# Supplementary material for: Somatic mutations in early metazoan genes disrupt regulatory links between unicellular and multicellular genes in cancer
Source: eLife journal article supplement (doi:10.7554/elife.40947), 2019-02-25
Supplement: supp [file elife-40947-supp-v1.zip]

Archive with 36 entries (36 files):
- elife_poa_e40947_Figure_5_figure_supplement_4.pdf
- elife_poa_e40947_Figure_1_figure_supplement_2.pdf
- elife_poa_e40947_Supplementary_File_1.txt
- elife_poa_e40947_Transparent_Reporting_File.pdf
- elife_poa_e40947_Figure_1_figure_supplement_7.pdf
- elife_poa_e40947_Figure_5_figure_supplement_6.pdf
- elife_poa_e40947_Figure_5_figure_supplement_3.pdf
- elife_poa_e40947_Supplementary_File_5.txt
- elife_poa_e40947_Figure_5_figure_supplement_2.pdf
- elife_poa_e40947_Figure_2_figure_supplement_6.pdf
- elife_poa_e40947_Figure_5_figure_supplement_1.pdf
- elife_poa_e40947_Figure_1_figure_supplement_4.pdf
- elife_poa_e40947_Figure_1_figure_supplement_9.pdf
- elife_poa_e40947_Figure_3_figure_supplement_2.pdf
- elife_poa_e40947_Figure_3_figure_supplement_1.pdf
- elife_poa_e40947_Figure_2_figure_supplement_4.pdf
- elife_poa_e40947_Figure_5_figure_supplement_7.pdf
- elife_poa_e40947_Figure_1_figure_supplement_3.pdf
- elife_poa_e40947_Figure_2_figure_supplement_1.pdf
- elife_poa_e40947_Figure_4_figure_supplement_2.pdf
- elife_poa_e40947_Figure_1_figure_supplement_5.pdf
- elife_poa_e40947_Figure_4_figure_supplement_3.pdf
- elife_poa_e40947_Figure_2_figure_supplement_3.pdf
- elife_poa_e40947_Figure_5_figure_supplement_5.pdf
- elife_poa_e40947_Supplementary_File_3.txt
- elife_poa_e40947_Figure_1_figure_supplement_8.pdf
- elife_poa_e40947_Figure_3_figure_supplement_3.pdf
- elife_poa_e40947_Figure_1_figure_supplement_6.pdf
- elife_poa_e40947_Figure_4_figure_supplement_4.pdf
- elife_poa_e40947_Supplementary_File_2.txt
- elife_poa_e40947_Figure_4_figure_supplement_1.pdf
- elife_poa_e40947_Supplementary_File_6.txt
- elife_poa_e40947_Figure_1_figure_supplement_1.pdf
- elife_poa_e40947_Supplementary_File_4.txt
- elife_poa_e40947_Figure_2_figure_supplement_5.pdf
- elife_poa_e40947_Figure_2_figure_supplement_2.pdf
