# Supplementary material for: Somatic mutations in early metazoan genes disrupt regulatory links between unicellular and multicellular genes in cancer
Source: eLife journal article supplement (doi:10.7554/elife.40947), 2019-02-25
Supplement: supp [file elife-40947-supp-v1.zip › elife_poa_e40947_Figure_4_figure_supplement_2.pdf]

Percentage of differentially expressed genes

Amp

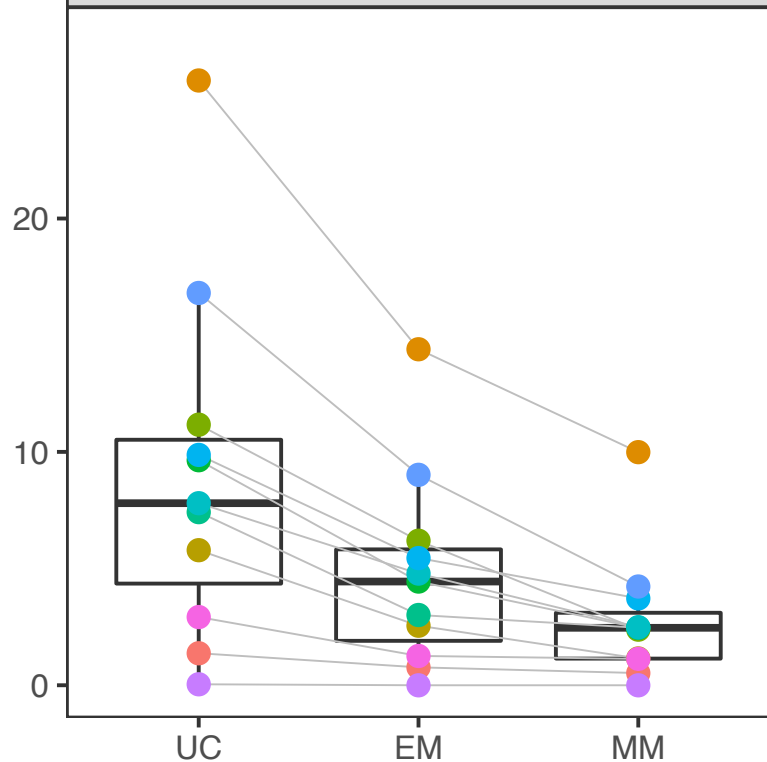

Age

Del

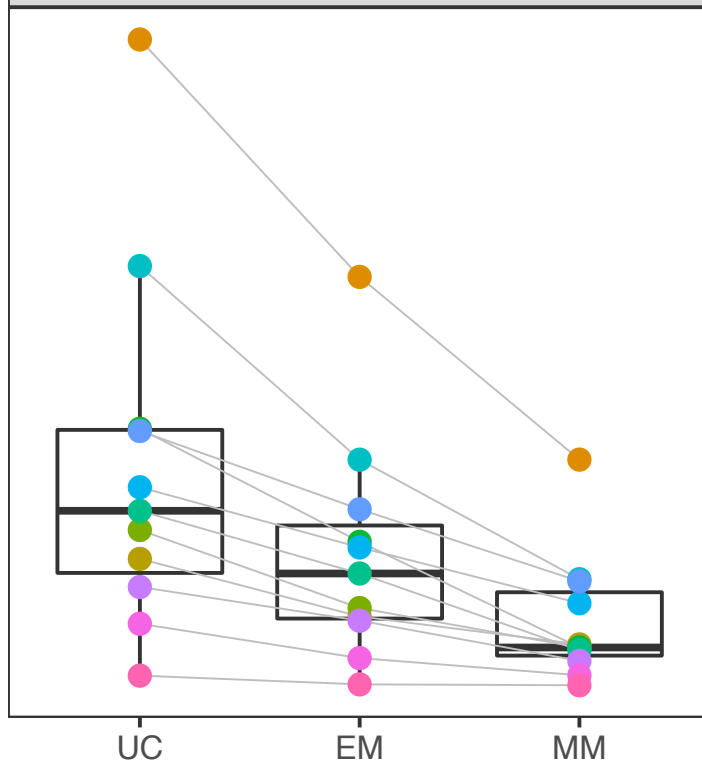

Tumour

- BLCA
- BRCA
- COAD
- HNSC
- KIRC
- KIRP
- LIHC
- LUAD
- LUSC
- PRAD
- STAD
- THCA
