# Supplementary material for: Somatic mutations in early metazoan genes disrupt regulatory links between unicellular and multicellular genes in cancer
Source: eLife journal article supplement (doi:10.7554/elife.40947), 2019-02-25
Supplement: supp [file elife-40947-supp-v1.zip › elife_poa_e40947_Figure_5_figure_supplement_2.pdf]

UC-t regulators

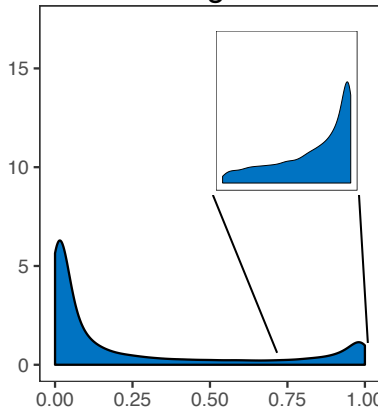

UC/EM-i regulators

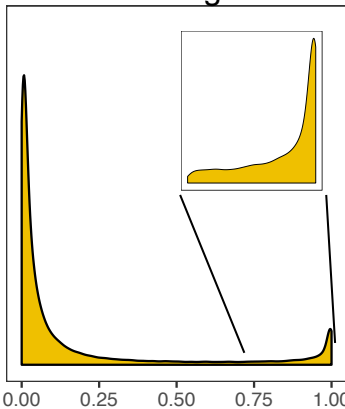

EM-t regulators

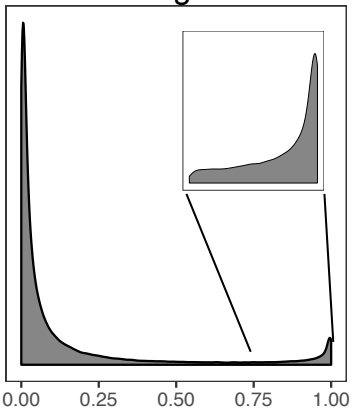

Probability of dependency after knockout of regulators
