# Supplementary material for: Somatic mutations in early metazoan genes disrupt regulatory links between unicellular and multicellular genes in cancer
Source: eLife journal article supplement (doi:10.7554/elife.40947), 2019-02-25

BMS-536924 – IGF1R

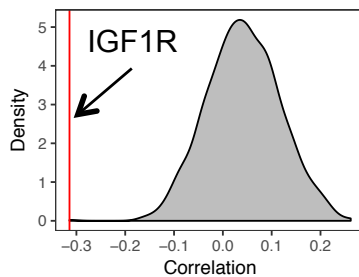

XAV939 – ILK

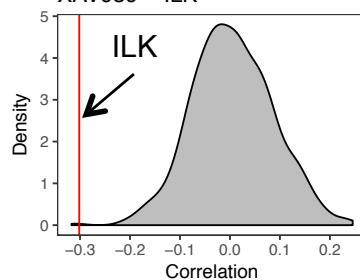

BMS-754807 – IGF1R

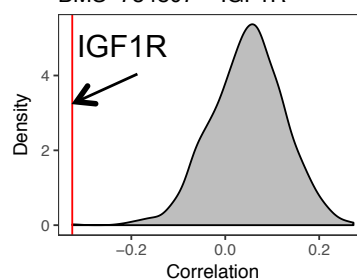

Linsitinib – IGF1R

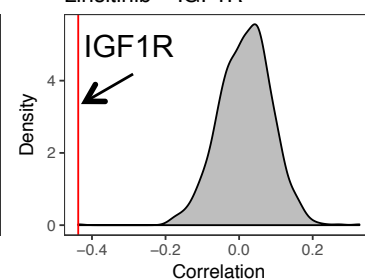

Temsirolimus – PPRC1

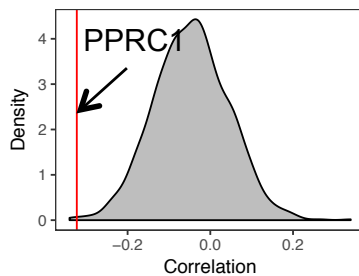

YK-4-279 – PPRC1

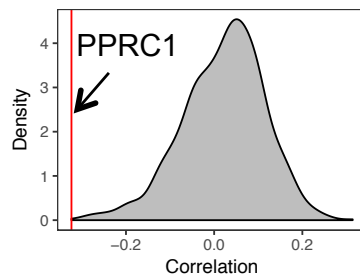

Dactolisib – PPRC1

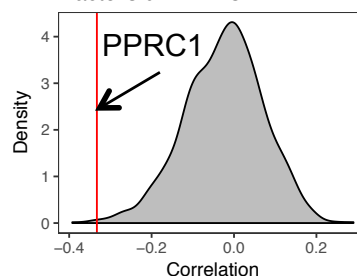

Docetaxel – PPRC1

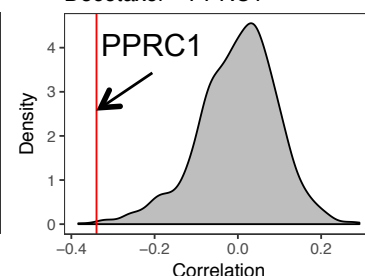

Cytarabine – TAF10

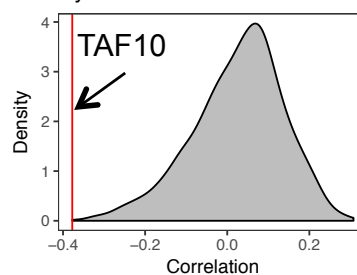

(5Z)-7-Oxozeaenol – MAPK1

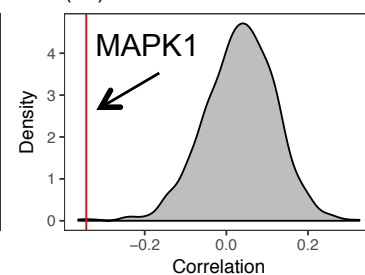

MG-132 – KAT2B

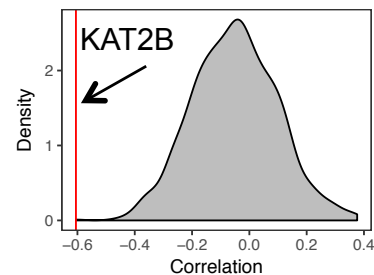

Supplement: supp [file elife-40947-supp-v1.zip › elife_poa_e40947_Figure_5_figure_supplement_6.pdf]
