# Supplementary material for: Somatic mutations in early metazoan genes disrupt regulatory links between unicellular and multicellular genes in cancer
Source: eLife journal article supplement (doi:10.7554/elife.40947), 2019-02-25
Supplement: supp [file elife-40947-supp-v1.zip › elife_poa_e40947_Supplementary_File_1.txt]

Hugo_Symbol	Number_mutations	Variant_type	Number_synonymous	Syn_ratio	Tumour	Frequency
A2ML1	1	LoF	0	Inf	ACC	Excluded
ABCA13	1	LoF	2	-1	ACC	Excluded
ABCC5	1	LoF	0	Inf	ACC	Excluded
ACAP2	1	LoF	0	Inf	ACC	Excluded
ACSL3	1	LoF	1	0	ACC	Excluded
ADAM11	1	LoF	0	Inf	ACC	Excluded
ADAMTS12	2	LoF	0	Inf	ACC	Excluded
ADIPOR1	1	LoF	0	Inf	ACC	Excluded
AGBL1	1	LoF	1	0	ACC	Excluded
AGBL2	1	LoF	0	Inf	ACC	Excluded
ALDH18A1	1	LoF	0	Inf	ACC	Excluded
ALG13	2	LoF	0	Inf	ACC	Excluded
ALK	1	LoF	1	0	ACC	Excluded
ANK3	1	LoF	0	Inf	ACC	Excluded
ANKRD55	2	LoF	0	Inf	ACC	Excluded
APAF1	1	LoF	0	Inf	ACC	Excluded
ARHGAP10	1	LoF	0	Inf	ACC	Excluded
ARHGAP44	1	LoF	0	Inf	ACC	Excluded
ARHGEF40	2	LoF	0	Inf	ACC	Excluded
ARID3A	2	LoF	0	Inf	ACC	Excluded
ARID5B	1	LoF	0	Inf	ACC	Excluded
ARRDC3	1	LoF	0	Inf	ACC	Excluded
ARSH	1	LoF	0	Inf	ACC	Excluded
ARSK	1	LoF	0	Inf	ACC	Excluded
ASB10	1	LoF	0	Inf	ACC	Excluded
ASUN	1	LoF	0	Inf	ACC	Excluded
ATP2B3	1	LoF	0	Inf	ACC	Excluded
ATRX	3	LoF	0	Inf	ACC	Recurrent
BIRC6	1	LoF	0	Inf	ACC	Excluded
BLMH	1	LoF	0	Inf	ACC	Excluded
BOD1L1	1	LoF	0	Inf	ACC	Excluded
BRD1	1	LoF	0	Inf	ACC	Excluded
BRF2	1	LoF	0	Inf	ACC	Excluded
BTN3A3	1	LoF	0	Inf	ACC	Excluded
C10orf71	1	LoF	0	Inf	ACC	Excluded
C22orf42	1	LoF	0	Inf	ACC	Excluded
CACNA1H	1	LoF	0	Inf	ACC	Excluded
CAPN6	1	LoF	0	Inf	ACC	Excluded
CAPRIN1	1	LoF	0	Inf	ACC	Excluded
CAPZA2	1	LoF	0	Inf	ACC	Excluded
CCNF	1	LoF	0	Inf	ACC	Excluded
CCNL2	1	LoF	1	0	ACC	Excluded
CCRN4L	1	LoF	0	Inf	ACC	Excluded
CD320	1	LoF	0	Inf	ACC	Excluded
CDKAL1	1	LoF	0	Inf	ACC	Excluded
CDKL3	1	LoF	0	Inf	ACC	Excluded
CENPC	1	LoF	0	Inf	ACC	Excluded
CENPE	1	LoF	0	Inf	ACC	Excluded
CHTF18	1	LoF	0	Inf	ACC	Excluded
CNGA2	1	LoF	1	0	ACC	Excluded
CNTLN	1	LoF	0	Inf	ACC	Excluded
CNTNAP4	1	LoF	0	Inf	ACC	Excluded
COL21A1	1	LoF	0	Inf	ACC	Excluded
COL5A1	1	LoF	1	0	ACC	Excluded
CREB3L3	1	LoF	0	Inf	ACC	Excluded
CRISP3	1	LoF	0	Inf	ACC	Excluded
CTSC	1	LoF	1	0	ACC	Excluded
CUL4A	1	LoF	0	Inf	ACC	Excluded
CXCL1	1	LoF	0	Inf	ACC	Excluded
DEAF1	1	LoF	0	Inf	ACC	Excluded
DENND2A	1	LoF	1	0	ACC	Excluded
DES	1	LoF	0	Inf	ACC	Excluded
DFNA5	1	LoF	1	0	ACC	Excluded
DHTKD1	1	LoF	0	Inf	ACC	Excluded
DIDO1	1	LoF	0	Inf	ACC	Excluded
DLG5	1	LoF	0	Inf	ACC	Excluded
DOCK5	1	LoF	0	Inf	ACC	Excluded
DPEP3	1	LoF	0	Inf	ACC	Excluded
DPPA2	1	LoF	0	Inf	ACC	Excluded
EBF1	1	LoF	0	Inf	ACC	Excluded
ECHS1	1	LoF	0	Inf	ACC	Excluded
EHMT1	1	LoF	0	Inf	ACC	Excluded
EMC1	1	LoF	0	Inf	ACC	Excluded
ENOX1	1	LoF	0	Inf	ACC	Excluded
EPHA6	1	LoF	0	Inf	ACC	Excluded
EPHB4	1	LoF	1	0	ACC	Excluded
EPRS	1	LoF	0	Inf	ACC	Excluded
ETS2	1	LoF	0	Inf	ACC	Excluded
F11R	1	LoF	0	Inf	ACC	Excluded
FAM13A	1	LoF	0	Inf	ACC	Excluded
FAM81B	2	LoF	0	Inf	ACC	Excluded
FAM83B	1	LoF	0	Inf	ACC	Excluded
FBN1	1	LoF	0	Inf	ACC	Excluded
FERD3L	1	LoF	0	Inf	ACC	Excluded
FNIP1	1	LoF	0	Inf	ACC	Excluded
GABRG1	1	LoF	0	Inf	ACC	Excluded
GADD45G	1	LoF	0	Inf	ACC	Excluded
GALNT3	2	LoF	1	1	ACC	Excluded
GATAD2B	1	LoF	0	Inf	ACC	Excluded
GJA8	1	LoF	0	Inf	ACC	Excluded
GNAS	1	LoF	0	Inf	ACC	Excluded
GNL3L	1	LoF	0	Inf	ACC	Excluded
GP2	1	LoF	1	0	ACC	Excluded
GPR158	1	LoF	0	Inf	ACC	Excluded
GRB14	1	LoF	0	Inf	ACC	Excluded
GRID2IP	1	LoF	0	Inf	ACC	Excluded
GSN	1	LoF	0	Inf	ACC	Excluded
GTF2IRD2	1	LoF	0	Inf	ACC	Excluded
HCFC1	1	LoF	0	Inf	ACC	Excluded
HERC2	1	LoF	1	0	ACC	Excluded
HGF	1	LoF	0	Inf	ACC	Excluded
HMCN2	1	LoF	0	Inf	ACC	Excluded
IFT140	1	LoF	0	Inf	ACC	Excluded
IFT52	2	LoF	0	Inf	ACC	Excluded
IGFL1	1	LoF	0	Inf	ACC	Excluded
IL23R	1	LoF	0	Inf	ACC	Excluded
IMMT	1	LoF	0	Inf	ACC	Excluded
INO80	1	LoF	0	Inf	ACC	Excluded
INSC	1	LoF	1	0	ACC	Excluded
ITIH6	1	LoF	0	Inf	ACC	Excluded
KCNH8	1	LoF	0	Inf	ACC	Excluded
KHSRP	1	LoF	0	Inf	ACC	Excluded
KIAA0319	1	LoF	0	Inf	ACC	Excluded
KIAA1109	1	LoF	0	Inf	ACC	Excluded
KIAA1210	1	LoF	0	Inf	ACC	Excluded
KLHL1	1	LoF	0	Inf	ACC	Excluded
KMT2C	2	LoF	0	Inf	ACC	Excluded
KRCC1	1	LoF	0	Inf	ACC	Excluded
LCK	1	LoF	0	Inf	ACC	Excluded
LGI4	1	LoF	0	Inf	ACC	Excluded
LOXL2	1	LoF	0	Inf	ACC	Excluded
LPCAT4	1	LoF	0	Inf	ACC	Excluded
LPPR4	1	LoF	0	Inf	ACC	Excluded
LRP2	1	LoF	0	Inf	ACC	Excluded
LRRC69	1	LoF	0	Inf	ACC	Excluded
LRRIQ1	1	LoF	0	Inf	ACC	Excluded
MAGEB6	1	LoF	0	Inf	ACC	Excluded
MDM2	1	LoF	0	Inf	ACC	Excluded
MED23	2	LoF	0	Inf	ACC	Excluded
MORN5	1	LoF	0	Inf	ACC	Excluded
MOV10L1	1	LoF	0	Inf	ACC	Excluded
MYO10	1	LoF	0	Inf	ACC	Excluded
NDST4	1	LoF	0	Inf	ACC	Excluded
NEFM	1	LoF	0	Inf	ACC	Excluded
NF1	3	LoF	1	1.58496250072116	ACC	Recurrent
NIPBL	1	LoF	0	Inf	ACC	Excluded
NLRP5	1	LoF	0	Inf	ACC	Excluded
NTAN1	1	LoF	0	Inf	ACC	Excluded
NUP205	1	LoF	0	Inf	ACC	Excluded
NYAP2	1	LoF	0	Inf	ACC	Excluded
OLFML2A	1	LoF	0	Inf	ACC	Excluded
OSTF1	1	LoF	0	Inf	ACC	Excluded
OVCH1	1	LoF	0	Inf	ACC	Excluded
PAPOLA	1	LoF	1	0	ACC	Excluded
PAPPA	1	LoF	0	Inf	ACC	Excluded
PARG	1	LoF	0	Inf	ACC	Excluded
PDE3A	1	LoF	0	Inf	ACC	Excluded
PDGFD	1	LoF	0	Inf	ACC	Excluded
PDILT	1	LoF	0	Inf	ACC	Excluded
PGAP1	1	LoF	0	Inf	ACC	Excluded
PGBD5	1	LoF	0	Inf	ACC	Excluded
PGRMC1	1	LoF	0	Inf	ACC	Excluded
PHLDB1	1	LoF	0	Inf	ACC	Excluded
PI4KA	1	LoF	0	Inf	ACC	Excluded
PKN3	1	LoF	0	Inf	ACC	Excluded
PLCB1	1	LoF	0	Inf	ACC	Excluded
PLEC	2	LoF	0	Inf	ACC	Excluded
PML	1	LoF	0	Inf	ACC	Excluded
PNPLA4	1	LoF	0	Inf	ACC	Excluded
POM121L2	1	LoF	0	Inf	ACC	Excluded
POT1	1	LoF	0	Inf	ACC	Excluded
POTED	1	LoF	0	Inf	ACC	Excluded
PPP1R3A	1	LoF	0	Inf	ACC	Excluded
PRDM9	1	LoF	0	Inf	ACC	Excluded
PREX2	1	LoF	0	Inf	ACC	Excluded
PRKCQ	1	LoF	0	Inf	ACC	Excluded
PRKDC	2	LoF	0	Inf	ACC	Excluded
PRTG	1	LoF	0	Inf	ACC	Excluded
PTPRZ1	1	LoF	0	Inf	ACC	Excluded
RANBP17	1	LoF	1	0	ACC	Excluded
RANBP6	1	LoF	0	Inf	ACC	Excluded
RB1	2	LoF	0	Inf	ACC	Excluded
RBM15B	1	LoF	0	Inf	ACC	Excluded
RFWD3	1	LoF	0	Inf	ACC	Excluded
RHAG	1	LoF	0	Inf	ACC	Excluded
RIMS1	1	LoF	1	0	ACC	Excluded
RNF169	1	LoF	0	Inf	ACC	Excluded
RNF219	1	LoF	0	Inf	ACC	Excluded
RNFT2	1	LoF	0	Inf	ACC	Excluded
RSL1D1	1	LoF	0	Inf	ACC	Excluded
RSPH3	1	LoF	0	Inf	ACC	Excluded
SEC63	1	LoF	0	Inf	ACC	Excluded
SERPINA10	1	LoF	0	Inf	ACC	Excluded
SLC2A3	1	LoF	0	Inf	ACC	Excluded
SLC39A12	1	LoF	0	Inf	ACC	Excluded
SLC4A10	1	LoF	0	Inf	ACC	Excluded
SLC5A7	1	LoF	1	0	ACC	Excluded
SLC6A1	2	LoF	0	Inf	ACC	Excluded
SLCO4C1	1	LoF	0	Inf	ACC	Excluded
SMARCAL1	1	LoF	0	Inf	ACC	Excluded
SMARCD3	1	LoF	0	Inf	ACC	Excluded
SPHKAP	1	LoF	0	Inf	ACC	Excluded
SRSF11	1	LoF	0	Inf	ACC	Excluded
STAB2	1	LoF	0	Inf	ACC	Excluded
STK11	1	LoF	0	Inf	ACC	Excluded
SUDS3	1	LoF	0	Inf	ACC	Excluded
SV2C	1	LoF	0	Inf	ACC	Excluded
SVIL	1	LoF	0	Inf	ACC	Excluded
SYNE1	1	LoF	1	0	ACC	Excluded
T	1	LoF	0	Inf	ACC	Excluded
TBC1D13	1	LoF	0	Inf	ACC	Excluded
TBC1D16	1	LoF	0	Inf	ACC	Excluded
TBC1D8B	1	LoF	0	Inf	ACC	Excluded
TCEB3B	1	LoF	0	Inf	ACC	Excluded
TCERG1	1	LoF	0	Inf	ACC	Excluded
THOC2	1	LoF	0	Inf	ACC	Excluded
TIGD5	1	LoF	0	Inf	ACC	Excluded
TMCC1	1	LoF	1	0	ACC	Excluded
TMEFF2	1	LoF	0	Inf	ACC	Excluded
TMEM132D	1	LoF	0	Inf	ACC	Excluded
TMEM135	1	LoF	0	Inf	ACC	Excluded
TMEM203	1	LoF	0	Inf	ACC	Excluded
TMEM55A	1	LoF	0	Inf	ACC	Excluded
TMEM87A	1	LoF	0	Inf	ACC	Excluded
TP53	1	LoF	0	Inf	ACC	Excluded
TRAF3IP3	2	LoF	0	Inf	ACC	Excluded
TRIB3	1	LoF	0	Inf	ACC	Excluded
TRIM33	1	LoF	0	Inf	ACC	Excluded
TRPM7	1	LoF	0	Inf	ACC	Excluded
TSC22D2	1	LoF	0	Inf	ACC	Excluded
TSPAN6	1	LoF	0	Inf	ACC	Excluded
TTC37	2	LoF	0	Inf	ACC	Excluded
UCMA	1	LoF	0	Inf	ACC	Excluded
UGT3A1	1	LoF	0	Inf	ACC	Excluded
ULK1	1	LoF	0	Inf	ACC	Excluded
UNC13C	1	LoF	0	Inf	ACC	Excluded
UPF2	1	LoF	0	Inf	ACC	Excluded
VAV3	1	LoF	1	0	ACC	Excluded
VPS35	1	LoF	0	Inf	ACC	Excluded
VSIG2	1	LoF	0	Inf	ACC	Excluded
VTI1B	1	LoF	0	Inf	ACC	Excluded
VWF	1	LoF	0	Inf	ACC	Excluded
WNT3	1	LoF	0	Inf	ACC	Excluded
YIPF6	1	LoF	0	Inf	ACC	Excluded
ZFPM2	1	LoF	0	Inf	ACC	Excluded
ZNF330	1	LoF	0	Inf	ACC	Excluded
ZNF462	1	LoF	0	Inf	ACC	Excluded
ZNF467	1	LoF	0	Inf	ACC	Excluded
ZNF536	1	LoF	0	Inf	ACC	Excluded
ZNF804A	1	LoF	1	0	ACC	Excluded
ZNF814	1	LoF	0	Inf	ACC	Excluded
ZZEF1	1	LoF	0	Inf	ACC	Excluded
AASDHPPT	1	Missense	0	Inf	ACC	Excluded
ABCA5	2	Missense	0	Inf	ACC	Excluded
ABCA6	1	Missense	0	Inf	ACC	Excluded
ABCB4	1	Missense	0	Inf	ACC	Excluded
ABCC12	1	Missense	1	0	ACC	Excluded
ABCC6	1	Missense	0	Inf	ACC	Excluded
ACOT4	1	Missense	0	Inf	ACC	Excluded
ACR	1	Missense	0	Inf	ACC	Excluded
ACSL3	1	Missense	1	0	ACC	Excluded
ACTR5	1	Missense	0	Inf	ACC	Excluded
ACVR1	1	Missense	0	Inf	ACC	Excluded
ADAM20	2	Missense	0	Inf	ACC	Excluded
ADAM23	1	Missense	0	Inf	ACC	Excluded
ADAMTS12	2	Missense	0	Inf	ACC	Excluded
ADAMTS16	1	Missense	0	Inf	ACC	Excluded
ADAMTS17	3	Missense	0	Inf	ACC	Recurrent
ADAMTS18	2	Missense	0	Inf	ACC	Excluded
ADAMTS19	1	Missense	0	Inf	ACC	Excluded
ADAMTS2	1	Missense	0	Inf	ACC	Excluded
ADAMTS20	2	Missense	0	Inf	ACC	Excluded
ADCY2	1	Missense	0	Inf	ACC	Excluded
ADCY4	1	Missense	1	0	ACC	Excluded
ADCY6	1	Missense	0	Inf	ACC	Excluded
ADRA2B	1	Missense	0	Inf	ACC	Excluded
AGBL1	1	Missense	1	0	ACC	Excluded
AGPAT5	1	Missense	0	Inf	ACC	Excluded
AGPS	1	Missense	0	Inf	ACC	Excluded
AIFM3	1	Missense	0	Inf	ACC	Excluded
AK5	1	Missense	0	Inf	ACC	Excluded
ALDH1L2	1	Missense	0	Inf	ACC	Excluded
ALDH8A1	1	Missense	0	Inf	ACC	Excluded
ALOX5	4	Missense	0	Inf	ACC	Recurrent
AMMECR1	1	Missense	0	Inf	ACC	Excluded
ANGPTL4	1	Missense	0	Inf	ACC	Excluded
ANKRD12	1	Missense	0	Inf	ACC	Excluded
ANKRD26	1	Missense	0	Inf	ACC	Excluded
ANKRD28	1	Missense	0	Inf	ACC	Excluded
ANKRD36C	1	Missense	0	Inf	ACC	Excluded
ANKZF1	1	Missense	0	Inf	ACC	Excluded
ANLN	1	Missense	0	Inf	ACC	Excluded
ARAP2	1	Missense	1	0	ACC	Excluded
ARAP3	1	Missense	0	Inf	ACC	Excluded
ARC	1	Missense	1	0	ACC	Excluded
ARFGEF2	1	Missense	0	Inf	ACC	Excluded
ARL4D	1	Missense	0	Inf	ACC	Excluded
ASCC3	1	Missense	0	Inf	ACC	Excluded
ASPM	1	Missense	2	-1	ACC	Excluded
ATF6	1	Missense	0	Inf	ACC	Excluded
ATG2B	2	Missense	0	Inf	ACC	Excluded
ATM	1	Missense	1	0	ACC	Excluded
ATP1B4	1	Missense	0	Inf	ACC	Excluded
ATP2B3	1	Missense	0	Inf	ACC	Excluded
ATP6AP1L	1	Missense	0	Inf	ACC	Excluded
ATP6V0D2	1	Missense	0	Inf	ACC	Excluded
ATP8B2	1	Missense	0	Inf	ACC	Excluded
AVPR1A	1	Missense	0	Inf	ACC	Excluded
B3GAT2	1	Missense	0	Inf	ACC	Excluded
B4GALT5	1	Missense	0	Inf	ACC	Excluded
BAIAP2L1	1	Missense	0	Inf	ACC	Excluded
BCHE	1	Missense	0	Inf	ACC	Excluded
BCO2	1	Missense	0	Inf	ACC	Excluded
BDP1	1	Missense	0	Inf	ACC	Excluded
BECN1	1	Missense	0	Inf	ACC	Excluded
BICD1	1	Missense	0	Inf	ACC	Excluded
BTG2	1	Missense	0	Inf	ACC	Excluded
C10orf71	1	Missense	0	Inf	ACC	Excluded
C16orf92	1	Missense	0	Inf	ACC	Excluded
C19orf18	1	Missense	0	Inf	ACC	Excluded
C1orf174	1	Missense	0	Inf	ACC	Excluded
C3AR1	1	Missense	0	Inf	ACC	Excluded
C9orf173	1	Missense	0	Inf	ACC	Excluded
CABLES2	1	Missense	0	Inf	ACC	Excluded
CACNA1C	1	Missense	0	Inf	ACC	Excluded
CACNA1S	1	Missense	1	0	ACC	Excluded
CACNB3	1	Missense	0	Inf	ACC	Excluded
CADPS2	1	Missense	0	Inf	ACC	Excluded
CALCR	1	Missense	0	Inf	ACC	Excluded
CAPN2	1	Missense	0	Inf	ACC	Excluded
CARD11	2	Missense	0	Inf	ACC	Excluded
CARD8	1	Missense	0	Inf	ACC	Excluded
CASS4	1	Missense	0	Inf	ACC	Excluded
CCDC170	1	Missense	0	Inf	ACC	Excluded
CCDC171	1	Missense	0	Inf	ACC	Excluded
CCNF	1	Missense	0	Inf	ACC	Excluded
CCR4	1	Missense	0	Inf	ACC	Excluded
CD5L	1	Missense	1	0	ACC	Excluded
CDC73	1	Missense	0	Inf	ACC	Excluded
CDCP1	1	Missense	0	Inf	ACC	Excluded
CDK13	1	Missense	0	Inf	ACC	Excluded
CDK8	1	Missense	0	Inf	ACC	Excluded
CEACAM5	1	Missense	0	Inf	ACC	Excluded
CEP19	1	Missense	0	Inf	ACC	Excluded
CHAT	1	Missense	0	Inf	ACC	Excluded
CHD2	2	Missense	0	Inf	ACC	Excluded
CHKB	1	Missense	0	Inf	ACC	Excluded
CHRNA3	1	Missense	0	Inf	ACC	Excluded
CHST11	1	Missense	0	Inf	ACC	Excluded
CINP	1	Missense	0	Inf	ACC	Excluded
CLEC4F	1	Missense	0	Inf	ACC	Excluded
CLSTN2	2	Missense	0	Inf	ACC	Excluded
CNGA2	1	Missense	1	0	ACC	Excluded
CNKSR1	1	Missense	0	Inf	ACC	Excluded
CNN1	1	Missense	0	Inf	ACC	Excluded
CNPY2	1	Missense	0	Inf	ACC	Excluded
CNTNAP4	1	Missense	0	Inf	ACC	Excluded
COL23A1	1	Missense	0	Inf	ACC	Excluded
COL6A6	1	Missense	0	Inf	ACC	Excluded
CPSF3	1	Missense	0	Inf	ACC	Excluded
CREB3L1	1	Missense	0	Inf	ACC	Excluded
CRIM1	2	Missense	1	1	ACC	Excluded
CS	1	Missense	0	Inf	ACC	Excluded
CTNNA2	1	Missense	0	Inf	ACC	Excluded
CTNNB1	6	Missense	0	Inf	ACC	Recurrent
CTNND2	1	Missense	1	0	ACC	Excluded
CUBN	2	Missense	0	Inf	ACC	Excluded
CUL3	1	Missense	0	Inf	ACC	Excluded
CYP4F3	1	Missense	0	Inf	ACC	Excluded
DCC	1	Missense	0	Inf	ACC	Excluded
DCHS1	1	Missense	0	Inf	ACC	Excluded
DCHS2	1	Missense	0	Inf	ACC	Excluded
DDX26B	1	Missense	0	Inf	ACC	Excluded
DDX53	2	Missense	0	Inf	ACC	Excluded
DDX60L	1	Missense	0	Inf	ACC	Excluded
DENND2A	1	Missense	1	0	ACC	Excluded
DENND4B	1	Missense	0	Inf	ACC	Excluded
DGKD	1	Missense	0	Inf	ACC	Excluded
DGKZ	1	Missense	0	Inf	ACC	Excluded
DHX34	1	Missense	0	Inf	ACC	Excluded
DIO3	1	Missense	0	Inf	ACC	Excluded
DIRAS3	1	Missense	0	Inf	ACC	Excluded
DLEC1	1	Missense	0	Inf	ACC	Excluded
DNAJA2	1	Missense	0	Inf	ACC	Excluded
DOCK2	1	Missense	0	Inf	ACC	Excluded
DPP3	1	Missense	0	Inf	ACC	Excluded
DRP2	1	Missense	0	Inf	ACC	Excluded
DSEL	1	Missense	0	Inf	ACC	Excluded
DSG1	2	Missense	1	1	ACC	Excluded
E4F1	1	Missense	0	Inf	ACC	Excluded
ECHDC3	1	Missense	0	Inf	ACC	Excluded
ECM2	1	Missense	0	Inf	ACC	Excluded
EEA1	1	Missense	0	Inf	ACC	Excluded
EEF2	1	Missense	0	Inf	ACC	Excluded
EGFLAM	1	Missense	0	Inf	ACC	Excluded
EGR1	1	Missense	0	Inf	ACC	Excluded
EGR3	1	Missense	0	Inf	ACC	Excluded
EHHADH	1	Missense	0	Inf	ACC	Excluded
EIF4E1B	1	Missense	0	Inf	ACC	Excluded
ELK4	1	Missense	0	Inf	ACC	Excluded
ELMSAN1	1	Missense	0	Inf	ACC	Excluded
ENPEP	1	Missense	0	Inf	ACC	Excluded
ENTPD4	1	Missense	0	Inf	ACC	Excluded
EPHA8	2	Missense	0	Inf	ACC	Excluded
EPHB6	1	Missense	0	Inf	ACC	Excluded
EPRS	1	Missense	0	Inf	ACC	Excluded
ERBB3	1	Missense	0	Inf	ACC	Excluded
ERBB4	1	Missense	0	Inf	ACC	Excluded
ERN2	1	Missense	2	-1	ACC	Excluded
ESCO2	1	Missense	0	Inf	ACC	Excluded
EXD2	1	Missense	0	Inf	ACC	Excluded
F11R	1	Missense	0	Inf	ACC	Excluded
FADD	1	Missense	0	Inf	ACC	Excluded
FAM124B	1	Missense	0	Inf	ACC	Excluded
FAM160A1	1	Missense	0	Inf	ACC	Excluded
FAM161B	1	Missense	0	Inf	ACC	Excluded
FAM171B	1	Missense	0	Inf	ACC	Excluded
FAM183B	1	Missense	0	Inf	ACC	Excluded
FAM63B	1	Missense	0	Inf	ACC	Excluded
FAM71F2	1	Missense	0	Inf	ACC	Excluded
FAN1	1	Missense	0	Inf	ACC	Excluded
FBLN7	1	Missense	0	Inf	ACC	Excluded
FBN1	1	Missense	0	Inf	ACC	Excluded
FBXO11	1	Missense	0	Inf	ACC	Excluded
FBXO8	1	Missense	0	Inf	ACC	Excluded
FKBP4	1	Missense	0	Inf	ACC	Excluded
FKBPL	1	Missense	0	Inf	ACC	Excluded
FKRP	1	Missense	0	Inf	ACC	Excluded
FLAD1	1	Missense	0	Inf	ACC	Excluded
FLNC	1	Missense	0	Inf	ACC	Excluded
FOXI1	1	Missense	0	Inf	ACC	Excluded
FRAS1	1	Missense	0	Inf	ACC	Excluded
FRMD4B	1	Missense	0	Inf	ACC	Excluded
FRMD7	1	Missense	0	Inf	ACC	Excluded
FRMPD3	2	Missense	0	Inf	ACC	Excluded
FSTL5	1	Missense	0	Inf	ACC	Excluded
FTHL17	1	Missense	0	Inf	ACC	Excluded
FUCA1	1	Missense	0	Inf	ACC	Excluded
FZD8	1	Missense	0	Inf	ACC	Excluded
FZR1	1	Missense	0	Inf	ACC	Excluded
G6PC3	1	Missense	0	Inf	ACC	Excluded
GABRB1	1	Missense	0	Inf	ACC	Excluded
GABRG3	1	Missense	0	Inf	ACC	Excluded
GALNS	1	Missense	0	Inf	ACC	Excluded
GAS6	1	Missense	0	Inf	ACC	Excluded
GCN1L1	1	Missense	0	Inf	ACC	Excluded
GFRA1	1	Missense	0	Inf	ACC	Excluded
GHDC	1	Missense	1	0	ACC	Excluded
GIMAP8	1	Missense	0	Inf	ACC	Excluded
GLTSCR1L	1	Missense	0	Inf	ACC	Excluded
GNAT2	2	Missense	0	Inf	ACC	Excluded
GNPAT	1	Missense	0	Inf	ACC	Excluded
GP2	1	Missense	1	0	ACC	Excluded
GPLD1	2	Missense	0	Inf	ACC	Excluded
GPR108	1	Missense	0	Inf	ACC	Excluded
GPR158	1	Missense	0	Inf	ACC	Excluded
GPR173	1	Missense	0	Inf	ACC	Excluded
GPX8	1	Missense	0	Inf	ACC	Excluded
GRHL3	1	Missense	0	Inf	ACC	Excluded
GRID2	1	Missense	0	Inf	ACC	Excluded
GRID2IP	1	Missense	0	Inf	ACC	Excluded
GRIK2	1	Missense	1	0	ACC	Excluded
GRIN2D	1	Missense	0	Inf	ACC	Excluded
GRIN3A	1	Missense	0	Inf	ACC	Excluded
GRM5	1	Missense	0	Inf	ACC	Excluded
GTF3C1	1	Missense	2	-1	ACC	Excluded
GTPBP2	1	Missense	0	Inf	ACC	Excluded
GUCY2D	1	Missense	0	Inf	ACC	Excluded
HAUS8	1	Missense	0	Inf	ACC	Excluded
HCN1	1	Missense	0	Inf	ACC	Excluded
HDAC4	1	Missense	0	Inf	ACC	Excluded
HDAC6	1	Missense	1	0	ACC	Excluded
HDLBP	1	Missense	0	Inf	ACC	Excluded
HFM1	1	Missense	1	0	ACC	Excluded
HHIPL2	2	Missense	0	Inf	ACC	Excluded
HIPK3	1	Missense	0	Inf	ACC	Excluded
HK3	1	Missense	0	Inf	ACC	Excluded
HKDC1	1	Missense	0	Inf	ACC	Excluded
HLTF	1	Missense	0	Inf	ACC	Excluded
HOMER1	1	Missense	0	Inf	ACC	Excluded
HOXA9	1	Missense	0	Inf	ACC	Excluded
HOXD8	1	Missense	0	Inf	ACC	Excluded
HS3ST2	2	Missense	0	Inf	ACC	Excluded
HSPA13	1	Missense	0	Inf	ACC	Excluded
IBTK	1	Missense	0	Inf	ACC	Excluded
ICAM1	1	Missense	2	-1	ACC	Excluded
IDH3G	1	Missense	0	Inf	ACC	Excluded
IDS	1	Missense	0	Inf	ACC	Excluded
IDUA	1	Missense	0	Inf	ACC	Excluded
IGFBP1	1	Missense	0	Inf	ACC	Excluded
IGFBP7	1	Missense	0	Inf	ACC	Excluded
IGKV5-2	2	Missense	0	Inf	ACC	Excluded
IKBKAP	1	Missense	0	Inf	ACC	Excluded
IL17A	1	Missense	0	Inf	ACC	Excluded
ILKAP	1	Missense	0	Inf	ACC	Excluded
INSM2	1	Missense	0	Inf	ACC	Excluded
INTS7	1	Missense	0	Inf	ACC	Excluded
IPO8	1	Missense	0	Inf	ACC	Excluded
IQCF6	1	Missense	0	Inf	ACC	Excluded
IQSEC2	2	Missense	0	Inf	ACC	Excluded
IRF2	1	Missense	0	Inf	ACC	Excluded
IRX6	1	Missense	1	0	ACC	Excluded
ITGA10	2	Missense	0	Inf	ACC	Excluded
ITGB8	1	Missense	0	Inf	ACC	Excluded
ITIH2	1	Missense	0	Inf	ACC	Excluded
ITLN2	1	Missense	0	Inf	ACC	Excluded
ITPR3	2	Missense	0	Inf	ACC	Excluded
JAG2	1	Missense	0	Inf	ACC	Excluded
JAKMIP3	1	Missense	0	Inf	ACC	Excluded
KALRN	2	Missense	0	Inf	ACC	Excluded
KCNA6	1	Missense	1	0	ACC	Excluded
KCNC4	1	Missense	1	0	ACC	Excluded
KCND2	1	Missense	1	0	ACC	Excluded
KCNH7	1	Missense	0	Inf	ACC	Excluded
KCNJ10	1	Missense	0	Inf	ACC	Excluded
KCNJ2	2	Missense	0	Inf	ACC	Excluded
KCNK18	1	Missense	0	Inf	ACC	Excluded
KCNQ3	1	Missense	0	Inf	ACC	Excluded
KCNS1	1	Missense	0	Inf	ACC	Excluded
KCTD19	1	Missense	0	Inf	ACC	Excluded
KDM7A	1	Missense	0	Inf	ACC	Excluded
KEL	2	Missense	0	Inf	ACC	Excluded
KIAA0556	2	Missense	0	Inf	ACC	Excluded
KIAA1107	1	Missense	0	Inf	ACC	Excluded
KIAA1715	1	Missense	0	Inf	ACC	Excluded
KIF23	1	Missense	0	Inf	ACC	Excluded
KIF2C	1	Missense	0	Inf	ACC	Excluded
KIF5A	1	Missense	0	Inf	ACC	Excluded
KIRREL	1	Missense	0	Inf	ACC	Excluded
KLHDC8B	1	Missense	0	Inf	ACC	Excluded
KLHL15	1	Missense	0	Inf	ACC	Excluded
KLHL3	1	Missense	0	Inf	ACC	Excluded
KMO	1	Missense	0	Inf	ACC	Excluded
KRBA1	1	Missense	0	Inf	ACC	Excluded
L1CAM	1	Missense	1	0	ACC	Excluded
L3MBTL1	1	Missense	0	Inf	ACC	Excluded
LAG3	1	Missense	0	Inf	ACC	Excluded
LAMA1	1	Missense	0	Inf	ACC	Excluded
LARGE	1	Missense	0	Inf	ACC	Excluded
LAX1	1	Missense	0	Inf	ACC	Excluded
LCN6	1	Missense	0	Inf	ACC	Excluded
LGI1	1	Missense	0	Inf	ACC	Excluded
LONRF1	1	Missense	0	Inf	ACC	Excluded
LONRF3	2	Missense	0	Inf	ACC	Excluded
LPPR4	3	Missense	0	Inf	ACC	Recurrent
LRFN2	1	Missense	0	Inf	ACC	Excluded
LRRC36	1	Missense	0	Inf	ACC	Excluded
LRRTM1	1	Missense	0	Inf	ACC	Excluded
LYRM7	1	Missense	0	Inf	ACC	Excluded
MAATS1	1	Missense	0	Inf	ACC	Excluded
MAGEA1	1	Missense	0	Inf	ACC	Excluded
MAGEB6	1	Missense	0	Inf	ACC	Excluded
MAGI3	2	Missense	0	Inf	ACC	Excluded
MAGIX	1	Missense	0	Inf	ACC	Excluded
MAML1	1	Missense	1	0	ACC	Excluded
MAPK11	1	Missense	0	Inf	ACC	Excluded
MAPK8IP3	1	Missense	0	Inf	ACC	Excluded
MARCH4	1	Missense	0	Inf	ACC	Excluded
MAST1	1	Missense	0	Inf	ACC	Excluded
MCF2L2	1	Missense	0	Inf	ACC	Excluded
MDGA2	1	Missense	0	Inf	ACC	Excluded
MDH2	1	Missense	0	Inf	ACC	Excluded
MED23	1	Missense	0	Inf	ACC	Excluded
MED4	1	Missense	0	Inf	ACC	Excluded
MEFV	1	Missense	2	-1	ACC	Excluded
MFN1	1	Missense	0	Inf	ACC	Excluded
MGA	1	Missense	0	Inf	ACC	Excluded
MGAM	1	Missense	0	Inf	ACC	Excluded
MLLT10	1	Missense	0	Inf	ACC	Excluded
MOXD1	1	Missense	0	Inf	ACC	Excluded
MPHOSPH9	1	Missense	0	Inf	ACC	Excluded
MPPED2	1	Missense	1	0	ACC	Excluded
MROH8	1	Missense	0	Inf	ACC	Excluded
MSH2	1	Missense	0	Inf	ACC	Excluded
MTHFD2L	1	Missense	0	Inf	ACC	Excluded
MTM1	1	Missense	0	Inf	ACC	Excluded
MTMR1	1	Missense	0	Inf	ACC	Excluded
MUL1	1	Missense	0	Inf	ACC	Excluded
MUSK	1	Missense	0	Inf	ACC	Excluded
MYBL2	1	Missense	0	Inf	ACC	Excluded
MYCT1	1	Missense	0	Inf	ACC	Excluded
MYH2	2	Missense	0	Inf	ACC	Excluded
MYH4	1	Missense	1	0	ACC	Excluded
MYL10	1	Missense	0	Inf	ACC	Excluded
MYO10	1	Missense	0	Inf	ACC	Excluded
MYO5A	1	Missense	0	Inf	ACC	Excluded
MYOM1	1	Missense	1	0	ACC	Excluded
MYOM2	2	Missense	0	Inf	ACC	Excluded
MYRF	1	Missense	0	Inf	ACC	Excluded
NAA35	1	Missense	0	Inf	ACC	Excluded
NALCN	1	Missense	0	Inf	ACC	Excluded
NAV3	1	Missense	0	Inf	ACC	Excluded
NCAN	1	Missense	1	0	ACC	Excluded
NCKAP5	1	Missense	0	Inf	ACC	Excluded
NECAP1	1	Missense	0	Inf	ACC	Excluded
NGFR	1	Missense	0	Inf	ACC	Excluded
NHSL2	1	Missense	0	Inf	ACC	Excluded
NID2	1	Missense	0	Inf	ACC	Excluded
NLN	1	Missense	1	0	ACC	Excluded
NLRC5	1	Missense	0	Inf	ACC	Excluded
NLRP3	2	Missense	0	Inf	ACC	Excluded
NLRP8	2	Missense	0	Inf	ACC	Excluded
NLRP9	1	Missense	1	0	ACC	Excluded
NOP56	1	Missense	0	Inf	ACC	Excluded
NOS1AP	1	Missense	0	Inf	ACC	Excluded
NOS3	1	Missense	0	Inf	ACC	Excluded
NOVA1	1	Missense	0	Inf	ACC	Excluded
NPAP1	1	Missense	0	Inf	ACC	Excluded
NPC1L1	1	Missense	0	Inf	ACC	Excluded
NR2F1	2	Missense	0	Inf	ACC	Excluded
NTRK3	1	Missense	0	Inf	ACC	Excluded
NUDT9	1	Missense	0	Inf	ACC	Excluded
OGFR	1	Missense	0	Inf	ACC	Excluded
OGT	1	Missense	0	Inf	ACC	Excluded
OSMR	1	Missense	0	Inf	ACC	Excluded
OTOP2	1	Missense	0	Inf	ACC	Excluded
OTP	1	Missense	0	Inf	ACC	Excluded
OTUD5	1	Missense	0	Inf	ACC	Excluded
OTUD6A	1	Missense	0	Inf	ACC	Excluded
PALM2-AKAP2	1	Missense	0	Inf	ACC	Excluded
PAPL	2	Missense	0	Inf	ACC	Excluded
PARP1	1	Missense	0	Inf	ACC	Excluded
PARP12	1	Missense	0	Inf	ACC	Excluded
PCCA	1	Missense	0	Inf	ACC	Excluded
PCDH17	1	Missense	0	Inf	ACC	Excluded
PCDH18	1	Missense	2	-1	ACC	Excluded
PCDH9	1	Missense	0	Inf	ACC	Excluded
PCNX	1	Missense	1	0	ACC	Excluded
PCYOX1L	1	Missense	0	Inf	ACC	Excluded
PCYT1B	1	Missense	0	Inf	ACC	Excluded
PDE3A	1	Missense	0	Inf	ACC	Excluded
PDE9A	1	Missense	0	Inf	ACC	Excluded
PDGFRA	1	Missense	0	Inf	ACC	Excluded
PEG3	2	Missense	0	Inf	ACC	Excluded
PGRMC1	1	Missense	0	Inf	ACC	Excluded
PHF20	1	Missense	0	Inf	ACC	Excluded
PI4K2A	2	Missense	0	Inf	ACC	Excluded
PIGG	1	Missense	0	Inf	ACC	Excluded
PIK3AP1	1	Missense	0	Inf	ACC	Excluded
PIKFYVE	1	Missense	0	Inf	ACC	Excluded
PIN4	1	Missense	0	Inf	ACC	Excluded
PIPOX	1	Missense	1	0	ACC	Excluded
PKHD1	2	Missense	1	1	ACC	Excluded
PLA2G4A	1	Missense	0	Inf	ACC	Excluded
PLXNA1	2	Missense	0	Inf	ACC	Excluded
PNLIP	1	Missense	1	0	ACC	Excluded
PNPLA6	1	Missense	0	Inf	ACC	Excluded
POLG	1	Missense	0	Inf	ACC	Excluded
POLR1C	1	Missense	0	Inf	ACC	Excluded
POT1	1	Missense	0	Inf	ACC	Excluded
PPEF1	1	Missense	0	Inf	ACC	Excluded
PPFIA2	1	Missense	0	Inf	ACC	Excluded
PPFIA3	1	Missense	0	Inf	ACC	Excluded
PPP1R16B	1	Missense	0	Inf	ACC	Excluded
PRAMEF2	1	Missense	0	Inf	ACC	Excluded
PRDX3	1	Missense	0	Inf	ACC	Excluded
PRKCQ	1	Missense	0	Inf	ACC	Excluded
PRKG2	1	Missense	1	0	ACC	Excluded
PROS1	1	Missense	0	Inf	ACC	Excluded
PRPF6	1	Missense	0	Inf	ACC	Excluded
PRR15	1	Missense	0	Inf	ACC	Excluded
PRR23A	1	Missense	0	Inf	ACC	Excluded
PRUNE2	2	Missense	0	Inf	ACC	Excluded
PSG9	1	Missense	0	Inf	ACC	Excluded
PSMB9	1	Missense	0	Inf	ACC	Excluded
PTCH1	1	Missense	0	Inf	ACC	Excluded
PTCHD2	1	Missense	1	0	ACC	Excluded
PTPN2	1	Missense	0	Inf	ACC	Excluded
PTPN4	1	Missense	0	Inf	ACC	Excluded
PURG	1	Missense	0	Inf	ACC	Excluded
PVR	1	Missense	0	Inf	ACC	Excluded
PVRL1	1	Missense	0	Inf	ACC	Excluded
PXDN	1	Missense	0	Inf	ACC	Excluded
PXDNL	2	Missense	0	Inf	ACC	Excluded
PZP	1	Missense	0	Inf	ACC	Excluded
QARS	1	Missense	0	Inf	ACC	Excluded
QSER1	1	Missense	0	Inf	ACC	Excluded
RAB8A	1	Missense	0	Inf	ACC	Excluded
RANBP2	1	Missense	0	Inf	ACC	Excluded
RAP2B	1	Missense	0	Inf	ACC	Excluded
RAP2C	1	Missense	0	Inf	ACC	Excluded
RARS2	1	Missense	0	Inf	ACC	Excluded
RASGEF1B	1	Missense	0	Inf	ACC	Excluded
RBM20	1	Missense	0	Inf	ACC	Excluded
RBM27	2	Missense	0	Inf	ACC	Excluded
RBP3	1	Missense	0	Inf	ACC	Excluded
RELN	3	Missense	1	1.58496250072116	ACC	Recurrent
REPS1	1	Missense	0	Inf	ACC	Excluded
RET	1	Missense	0	Inf	ACC	Excluded
RGS1	1	Missense	0	Inf	ACC	Excluded
RGS18	1	Missense	0	Inf	ACC	Excluded
RHBDD2	1	Missense	0	Inf	ACC	Excluded
RHBDF1	1	Missense	0	Inf	ACC	Excluded
RIMS1	1	Missense	1	0	ACC	Excluded
RIPK2	1	Missense	0	Inf	ACC	Excluded
ROBO1	1	Missense	0	Inf	ACC	Excluded
ROCK1	1	Missense	0	Inf	ACC	Excluded
ROR1	1	Missense	0	Inf	ACC	Excluded
RRAGB	1	Missense	0	Inf	ACC	Excluded
SACM1L	1	Missense	0	Inf	ACC	Excluded
SAMD5	1	Missense	0	Inf	ACC	Excluded
SAMD9L	1	Missense	0	Inf	ACC	Excluded
SART3	1	Missense	0	Inf	ACC	Excluded
SCN11A	1	Missense	0	Inf	ACC	Excluded
SEC24C	1	Missense	0	Inf	ACC	Excluded
SEMA3D	1	Missense	0	Inf	ACC	Excluded
SEMA5A	1	Missense	0	Inf	ACC	Excluded
SEMA6D	1	Missense	0	Inf	ACC	Excluded
SEPT8	1	Missense	0	Inf	ACC	Excluded
SERPINA7	1	Missense	0	Inf	ACC	Excluded
SERPINB1	1	Missense	0	Inf	ACC	Excluded
SERPINB12	1	Missense	0	Inf	ACC	Excluded
SETBP1	1	Missense	0	Inf	ACC	Excluded
SETD5	1	Missense	0	Inf	ACC	Excluded
SETX	2	Missense	0	Inf	ACC	Excluded
SEZ6L	1	Missense	0	Inf	ACC	Excluded
SGIP1	1	Missense	0	Inf	ACC	Excluded
SGOL2	1	Missense	1	0	ACC	Excluded
SH3RF3	1	Missense	0	Inf	ACC	Excluded
SH3TC2	1	Missense	1	0	ACC	Excluded
SHROOM3	1	Missense	0	Inf	ACC	Excluded
SLC17A6	1	Missense	0	Inf	ACC	Excluded
SLC18A3	1	Missense	0	Inf	ACC	Excluded
SLC24A2	2	Missense	0	Inf	ACC	Excluded
SLC25A27	1	Missense	0	Inf	ACC	Excluded
SLC25A37	1	Missense	0	Inf	ACC	Excluded
SLC27A5	1	Missense	0	Inf	ACC	Excluded
SLC2A13	1	Missense	0	Inf	ACC	Excluded
SLC35B3	1	Missense	0	Inf	ACC	Excluded
SLC44A3	1	Missense	0	Inf	ACC	Excluded
SLC5A6	1	Missense	0	Inf	ACC	Excluded
SLC6A9	1	Missense	1	0	ACC	Excluded
SLIT1	1	Missense	0	Inf	ACC	Excluded
SLIT2	1	Missense	0	Inf	ACC	Excluded
SLITRK6	1	Missense	0	Inf	ACC	Excluded
SLK	1	Missense	0	Inf	ACC	Excluded
SMARCA5	1	Missense	0	Inf	ACC	Excluded
SMC3	1	Missense	0	Inf	ACC	Excluded
SMO	1	Missense	0	Inf	ACC	Excluded
SNTA1	1	Missense	0	Inf	ACC	Excluded
SOBP	1	Missense	0	Inf	ACC	Excluded
SOX11	1	Missense	0	Inf	ACC	Excluded
SPATA18	1	Missense	0	Inf	ACC	Excluded
SPATA31E1	1	Missense	0	Inf	ACC	Excluded
SPG7	1	Missense	1	0	ACC	Excluded
SPHK2	1	Missense	0	Inf	ACC	Excluded
SPIN3	1	Missense	0	Inf	ACC	Excluded
SPPL3	1	Missense	0	Inf	ACC	Excluded
SPR	1	Missense	0	Inf	ACC	Excluded
SRBD1	1	Missense	0	Inf	ACC	Excluded
ST18	1	Missense	1	0	ACC	Excluded
STAB1	1	Missense	0	Inf	ACC	Excluded
STARD7	1	Missense	0	Inf	ACC	Excluded
STAT6	1	Missense	0	Inf	ACC	Excluded
STK11	1	Missense	0	Inf	ACC	Excluded
STK4	1	Missense	0	Inf	ACC	Excluded
STRN	1	Missense	0	Inf	ACC	Excluded
STYK1	2	Missense	0	Inf	ACC	Excluded
SULF2	2	Missense	1	1	ACC	Excluded
SVOPL	1	Missense	0	Inf	ACC	Excluded
TAAR5	1	Missense	1	0	ACC	Excluded
TAB3	1	Missense	0	Inf	ACC	Excluded
TAS2R31	1	Missense	0	Inf	ACC	Excluded
TAS2R5	1	Missense	0	Inf	ACC	Excluded
TBC1D2B	1	Missense	0	Inf	ACC	Excluded
TBL2	1	Missense	0	Inf	ACC	Excluded
TCOF1	1	Missense	0	Inf	ACC	Excluded
TEC	1	Missense	0	Inf	ACC	Excluded
TECRL	1	Missense	0	Inf	ACC	Excluded
TET1	1	Missense	0	Inf	ACC	Excluded
TEX13A	2	Missense	0	Inf	ACC	Excluded
TFDP3	1	Missense	0	Inf	ACC	Excluded
TG	1	Missense	0	Inf	ACC	Excluded
TGM6	1	Missense	0	Inf	ACC	Excluded
THRA	1	Missense	0	Inf	ACC	Excluded
TIAM1	1	Missense	0	Inf	ACC	Excluded
TKTL2	1	Missense	0	Inf	ACC	Excluded
TLL1	1	Missense	1	0	ACC	Excluded
TLR2	1	Missense	0	Inf	ACC	Excluded
TMC4	1	Missense	0	Inf	ACC	Excluded
TMCC1	1	Missense	1	0	ACC	Excluded
TMEFF2	1	Missense	0	Inf	ACC	Excluded
TMEM132B	1	Missense	0	Inf	ACC	Excluded
TMEM144	1	Missense	0	Inf	ACC	Excluded
TMEM215	1	Missense	0	Inf	ACC	Excluded
TMEM225	1	Missense	0	Inf	ACC	Excluded
TMPRSS11E	1	Missense	0	Inf	ACC	Excluded
TNKS	1	Missense	0	Inf	ACC	Excluded
TNN	1	Missense	1	0	ACC	Excluded
TNS3	1	Missense	0	Inf	ACC	Excluded
TOM1L1	1	Missense	0	Inf	ACC	Excluded
TOX	1	Missense	0	Inf	ACC	Excluded
TRAPPC12	2	Missense	0	Inf	ACC	Excluded
TRHDE	1	Missense	0	Inf	ACC	Excluded
TRMT13	1	Missense	0	Inf	ACC	Excluded
TRPC3	1	Missense	0	Inf	ACC	Excluded
TRPM6	3	Missense	1	1.58496250072116	ACC	Recurrent
TRPM7	1	Missense	0	Inf	ACC	Excluded
TTC1	1	Missense	0	Inf	ACC	Excluded
TTC21B	1	Missense	0	Inf	ACC	Excluded
TTC26	1	Missense	0	Inf	ACC	Excluded
TXNDC16	1	Missense	0	Inf	ACC	Excluded
UBE3B	1	Missense	0	Inf	ACC	Excluded
UBTD2	1	Missense	0	Inf	ACC	Excluded
UGT2A3	1	Missense	1	0	ACC	Excluded
URB1	1	Missense	0	Inf	ACC	Excluded
USP38	1	Missense	0	Inf	ACC	Excluded
UTP11L	1	Missense	0	Inf	ACC	Excluded
VAT1L	1	Missense	0	Inf	ACC	Excluded
VCAN	1	Missense	1	0	ACC	Excluded
VIPR2	1	Missense	0	Inf	ACC	Excluded
VPS13B	1	Missense	0	Inf	ACC	Excluded
VWC2L	1	Missense	0	Inf	ACC	Excluded
VWDE	1	Missense	0	Inf	ACC	Excluded
VWF	1	Missense	0	Inf	ACC	Excluded
WDFY3	1	Missense	0	Inf	ACC	Excluded
WDFY4	1	Missense	2	-1	ACC	Excluded
WDR44	1	Missense	0	Inf	ACC	Excluded
WFIKKN2	1	Missense	0	Inf	ACC	Excluded
WNK3	1	Missense	0	Inf	ACC	Excluded
WNT10A	1	Missense	0	Inf	ACC	Excluded
XDH	1	Missense	0	Inf	ACC	Excluded
XKR4	1	Missense	0	Inf	ACC	Excluded
XPC	1	Missense	0	Inf	ACC	Excluded
XPNPEP1	1	Missense	0	Inf	ACC	Excluded
YTHDF1	1	Missense	0	Inf	ACC	Excluded
ZAP70	1	Missense	0	Inf	ACC	Excluded
ZBTB21	1	Missense	0	Inf	ACC	Excluded
ZBTB22	2	Missense	0	Inf	ACC	Excluded
ZCCHC16	1	Missense	0	Inf	ACC	Excluded
ZCCHC4	1	Missense	0	Inf	ACC	Excluded
ZFC3H1	1	Missense	0	Inf	ACC	Excluded
ZFP1	1	Missense	0	Inf	ACC	Excluded
ZFP64	1	Missense	0	Inf	ACC	Excluded
ZNF263	1	Missense	0	Inf	ACC	Excluded
ZNF281	1	Missense	0	Inf	ACC	Excluded
ZNF382	1	Missense	0	Inf	ACC	Excluded
ZNF546	1	Missense	0	Inf	ACC	Excluded
ZNF598	1	Missense	0	Inf	ACC	Excluded
ZNF653	1	Missense	1	0	ACC	Excluded
ZNF697	1	Missense	0	Inf	ACC	Excluded
ZNF77	1	Missense	0	Inf	ACC	Excluded
ZNF793	1	Missense	0	Inf	ACC	Excluded
ZNF804B	2	Missense	0	Inf	ACC	Excluded
ZNF813	1	Missense	0	Inf	ACC	Excluded
ZRSR1	1	Missense	0	Inf	ACC	Excluded
ZSWIM6	1	Missense	0	Inf	ACC	Excluded
A1BG	1	LoF	1	0	BLCA	Excluded
A2M	3	LoF	5	-0.736965594166206	BLCA	Excluded
AASDH	1	LoF	1	0	BLCA	Excluded
AASS	1	LoF	1	0	BLCA	Excluded
AATF	2	LoF	1	1	BLCA	Excluded
AATK	1	LoF	1	0	BLCA	Excluded
ABCA13	3	LoF	7	-1.22239242133645	BLCA	Excluded
ABCA3	1	LoF	1	0	BLCA	Excluded
ABCA4	2	LoF	6	-1.58496250072116	BLCA	Excluded
ABCA5	1	LoF	1	0	BLCA	Excluded
ABCA7	3	LoF	4	-0.415037499278844	BLCA	Excluded
ABCA9	2	LoF	3	-0.584962500721156	BLCA	Excluded
ABCB4	1	LoF	1	0	BLCA	Excluded
ABCB5	1	LoF	1	0	BLCA	Excluded
ABCB6	1	LoF	0	Inf	BLCA	Excluded
ABCC1	1	LoF	4	-2	BLCA	Excluded
ABCC12	1	LoF	5	-2.32192809488736	BLCA	Excluded
ABCC4	2	LoF	0	Inf	BLCA	Excluded
ABCC5	3	LoF	3	0	BLCA	Excluded
ABCD2	1	LoF	0	Inf	BLCA	Excluded
ABHD16A	1	LoF	1	0	BLCA	Excluded
ABI3BP	1	LoF	1	0	BLCA	Excluded
ACACA	2	LoF	7	-1.8073549220576	BLCA	Excluded
ACACB	1	LoF	4	-2	BLCA	Excluded
ACAP3	1	LoF	0	Inf	BLCA	Excluded
ACCSL	1	LoF	0	Inf	BLCA	Excluded
ACE	1	LoF	1	0	BLCA	Excluded
ACIN1	1	LoF	2	-1	BLCA	Excluded
ACMSD	1	LoF	0	Inf	BLCA	Excluded
ACOX3	1	LoF	3	-1.58496250072116	BLCA	Excluded
ACRC	1	LoF	0	Inf	BLCA	Excluded
ACSBG2	1	LoF	2	-1	BLCA	Excluded
ACSM5	1	LoF	0	Inf	BLCA	Excluded
ACTL8	1	LoF	0	Inf	BLCA	Excluded
ACTR3B	1	LoF	0	Inf	BLCA	Excluded
ACTR8	1	LoF	0	Inf	BLCA	Excluded
ACTRT1	2	LoF	1	1	BLCA	Excluded
ADAM17	2	LoF	0	Inf	BLCA	Excluded
ADAM2	2	LoF	0	Inf	BLCA	Excluded
ADAM21	1	LoF	0	Inf	BLCA	Excluded
ADAM7	1	LoF	0	Inf	BLCA	Excluded
ADAMTS13	1	LoF	0	Inf	BLCA	Excluded
ADAMTS16	2	LoF	3	-0.584962500721156	BLCA	Excluded
ADAMTS18	1	LoF	3	-1.58496250072116	BLCA	Excluded
ADAMTS19	2	LoF	4	-1	BLCA	Excluded
ADAMTS6	2	LoF	1	1	BLCA	Excluded
ADAMTSL2	1	LoF	3	-1.58496250072116	BLCA	Excluded
ADAMTSL3	2	LoF	4	-1	BLCA	Excluded
ADCY1	1	LoF	2	-1	BLCA	Excluded
ADCY2	2	LoF	2	0	BLCA	Excluded
ADH1B	1	LoF	0	Inf	BLCA	Excluded
ADH4	1	LoF	1	0	BLCA	Excluded
ADHFE1	1	LoF	0	Inf	BLCA	Excluded
ADRA1D	1	LoF	0	Inf	BLCA	Excluded
AFF4	1	LoF	1	0	BLCA	Excluded
AGBL1	1	LoF	0	Inf	BLCA	Excluded
AGFG2	1	LoF	0	Inf	BLCA	Excluded
AGO4	1	LoF	2	-1	BLCA	Excluded
AGPAT2	1	LoF	0	Inf	BLCA	Excluded
AGPS	1	LoF	2	-1	BLCA	Excluded
AGR3	1	LoF	0	Inf	BLCA	Excluded
AGTRAP	1	LoF	0	Inf	BLCA	Excluded
AGXT2	1	LoF	1	0	BLCA	Excluded
AHNAK	3	LoF	14	-2.22239242133645	BLCA	Excluded
AHNAK2	2	LoF	13	-2.70043971814109	BLCA	Excluded
AHR	1	LoF	1	0	BLCA	Excluded
AIM1	1	LoF	2	-1	BLCA	Excluded
AIPL1	1	LoF	1	0	BLCA	Excluded
AK5	1	LoF	0	Inf	BLCA	Excluded
AK9	2	LoF	1	1	BLCA	Excluded
AKAP6	6	LoF	2	1.58496250072116	BLCA	Recurrent
AKAP8	1	LoF	0	Inf	BLCA	Excluded
AKAP9	2	LoF	6	-1.58496250072116	BLCA	Excluded
AKIRIN2	1	LoF	0	Inf	BLCA	Excluded
AKR1C3	1	LoF	0	Inf	BLCA	Excluded
AKR1E2	1	LoF	0	Inf	BLCA	Excluded
AKT3	1	LoF	1	0	BLCA	Excluded
ALCAM	1	LoF	0	Inf	BLCA	Excluded
ALDH1L2	2	LoF	1	1	BLCA	Excluded
ALDH9A1	1	LoF	0	Inf	BLCA	Excluded
ALG2	1	LoF	1	0	BLCA	Excluded
ALMS1	3	LoF	8	-1.41503749927884	BLCA	Excluded
ALOX5	1	LoF	0	Inf	BLCA	Excluded
ALPK3	1	LoF	3	-1.58496250072116	BLCA	Excluded
ALYREF	1	LoF	0	Inf	BLCA	Excluded
AMDHD1	1	LoF	1	0	BLCA	Excluded
AMER1	3	LoF	2	0.584962500721156	BLCA	Excluded
AMN	1	LoF	1	0	BLCA	Excluded
AMOT	2	LoF	1	1	BLCA	Excluded
AMOTL1	3	LoF	1	1.58496250072116	BLCA	Recurrent
AMPD1	1	LoF	1	0	BLCA	Excluded
AMY2B	1	LoF	0	Inf	BLCA	Excluded
ANAPC1	1	LoF	1	0	BLCA	Excluded
ANAPC5	2	LoF	0	Inf	BLCA	Excluded
ANGPT4	1	LoF	1	0	BLCA	Excluded
ANK2	2	LoF	6	-1.58496250072116	BLCA	Excluded
ANK3	2	LoF	6	-1.58496250072116	BLCA	Excluded
ANKIB1	1	LoF	1	0	BLCA	Excluded
ANKRA2	1	LoF	0	Inf	BLCA	Excluded
ANKRD11	3	LoF	6	-1	BLCA	Excluded
ANKRD12	1	LoF	3	-1.58496250072116	BLCA	Excluded
ANKRD20A4	1	LoF	0	Inf	BLCA	Excluded
ANKRD27	1	LoF	0	Inf	BLCA	Excluded
ANKRD35	1	LoF	1	0	BLCA	Excluded
ANKRD54	1	LoF	0	Inf	BLCA	Excluded
ANKS1B	1	LoF	4	-2	BLCA	Excluded
ANKZF1	1	LoF	0	Inf	BLCA	Excluded
ANLN	1	LoF	0	Inf	BLCA	Excluded
ANO10	1	LoF	0	Inf	BLCA	Excluded
ANO4	2	LoF	3	-0.584962500721156	BLCA	Excluded
ANO7	1	LoF	5	-2.32192809488736	BLCA	Excluded
ANP32E	1	LoF	0	Inf	BLCA	Excluded
ANXA7	2	LoF	0	Inf	BLCA	Excluded
ANXA9	2	LoF	1	1	BLCA	Excluded
AOC2	1	LoF	1	0	BLCA	Excluded
AOX1	3	LoF	1	1.58496250072116	BLCA	Recurrent
AP3B1	1	LoF	1	0	BLCA	Excluded
AP4E1	2	LoF	0	Inf	BLCA	Excluded
APAF1	1	LoF	1	0	BLCA	Excluded
APC	2	LoF	3	-0.584962500721156	BLCA	Excluded
APOA4	1	LoF	2	-1	BLCA	Excluded
APOB	1	LoF	11	-3.4594316186373	BLCA	Excluded
APP	1	LoF	1	0	BLCA	Excluded
AQP1	1	LoF	1	0	BLCA	Excluded
AQP10	1	LoF	1	0	BLCA	Excluded
ARAP2	2	LoF	3	-0.584962500721156	BLCA	Excluded
ARAP3	2	LoF	4	-1	BLCA	Excluded
AREL1	1	LoF	3	-1.58496250072116	BLCA	Excluded
ARFGAP3	1	LoF	0	Inf	BLCA	Excluded
ARFGEF2	1	LoF	4	-2	BLCA	Excluded
ARG2	1	LoF	1	0	BLCA	Excluded
ARGFX	1	LoF	0	Inf	BLCA	Excluded
ARHGAP11A	1	LoF	1	0	BLCA	Excluded
ARHGAP12	1	LoF	1	0	BLCA	Excluded
ARHGAP15	1	LoF	1	0	BLCA	Excluded
ARHGAP17	1	LoF	0	Inf	BLCA	Excluded
ARHGAP24	1	LoF	0	Inf	BLCA	Excluded
ARHGAP26	3	LoF	3	0	BLCA	Excluded
ARHGAP29	1	LoF	1	0	BLCA	Excluded
ARHGAP31	3	LoF	0	Inf	BLCA	Recurrent
ARHGAP32	2	LoF	6	-1.58496250072116	BLCA	Excluded
ARHGAP44	1	LoF	1	0	BLCA	Excluded
ARHGAP5	1	LoF	2	-1	BLCA	Excluded
ARHGAP6	1	LoF	0	Inf	BLCA	Excluded
ARHGAP9	1	LoF	2	-1	BLCA	Excluded
ARHGEF10L	1	LoF	1	0	BLCA	Excluded
ARHGEF12	1	LoF	1	0	BLCA	Excluded
ARHGEF15	1	LoF	0	Inf	BLCA	Excluded
ARHGEF18	1	LoF	0	Inf	BLCA	Excluded
ARHGEF2	1	LoF	1	0	BLCA	Excluded
ARID1A	39	LoF	7	2.47804729680464	BLCA	Recurrent
ARID2	11	LoF	4	1.4594316186373	BLCA	Recurrent
ARID3A	1	LoF	0	Inf	BLCA	Excluded
ARID4B	1	LoF	0	Inf	BLCA	Excluded
ARID5B	1	LoF	3	-1.58496250072116	BLCA	Excluded
ARIH2	2	LoF	0	Inf	BLCA	Excluded
ARL11	1	LoF	1	0	BLCA	Excluded
ARMC3	2	LoF	3	-0.584962500721156	BLCA	Excluded
ARNT	1	LoF	0	Inf	BLCA	Excluded
ARPC1A	1	LoF	2	-1	BLCA	Excluded
ARRDC3	2	LoF	0	Inf	BLCA	Excluded
ARSB	1	LoF	0	Inf	BLCA	Excluded
ARSG	1	LoF	2	-1	BLCA	Excluded
ARSJ	2	LoF	0	Inf	BLCA	Excluded
ARVCF	1	LoF	3	-1.58496250072116	BLCA	Excluded
AS3MT	1	LoF	2	-1	BLCA	Excluded
ASAP1	2	LoF	2	0	BLCA	Excluded
ASAP2	1	LoF	1	0	BLCA	Excluded
ASB11	1	LoF	1	0	BLCA	Excluded
ASB16	1	LoF	0	Inf	BLCA	Excluded
ASB8	1	LoF	1	0	BLCA	Excluded
ASCC3	1	LoF	7	-2.8073549220576	BLCA	Excluded
ASF1B	1	LoF	0	Inf	BLCA	Excluded
ASL	1	LoF	2	-1	BLCA	Excluded
ASNSD1	1	LoF	1	0	BLCA	Excluded
ASPN	1	LoF	0	Inf	BLCA	Excluded
ASTL	2	LoF	1	1	BLCA	Excluded
ASUN	1	LoF	4	-2	BLCA	Excluded
ASXL1	2	LoF	1	1	BLCA	Excluded
ASXL3	1	LoF	4	-2	BLCA	Excluded
ATAD2	3	LoF	1	1.58496250072116	BLCA	Recurrent
ATAD5	5	LoF	1	2.32192809488736	BLCA	Recurrent
ATCAY	1	LoF	0	Inf	BLCA	Excluded
ATF6	2	LoF	1	1	BLCA	Excluded
ATF6B	1	LoF	5	-2.32192809488736	BLCA	Excluded
ATG10	1	LoF	0	Inf	BLCA	Excluded
ATG14	3	LoF	1	1.58496250072116	BLCA	Recurrent
ATG2A	1	LoF	4	-2	BLCA	Excluded
ATM	13	LoF	3	2.11547721741994	BLCA	Recurrent
ATMIN	3	LoF	0	Inf	BLCA	Recurrent
ATN1	1	LoF	0	Inf	BLCA	Excluded
ATP11C	1	LoF	2	-1	BLCA	Excluded
ATP13A4	1	LoF	1	0	BLCA	Excluded
ATP1A4	1	LoF	1	0	BLCA	Excluded
ATP2B1	2	LoF	2	0	BLCA	Excluded
ATP5C1	1	LoF	0	Inf	BLCA	Excluded
ATP6AP1L	1	LoF	1	0	BLCA	Excluded
ATP6V0A2	1	LoF	1	0	BLCA	Excluded
ATP6V1B1	2	LoF	2	0	BLCA	Excluded
ATP8A1	2	LoF	1	1	BLCA	Excluded
ATP8A2	2	LoF	3	-0.584962500721156	BLCA	Excluded
ATP8B4	4	LoF	4	0	BLCA	Excluded
ATR	1	LoF	2	-1	BLCA	Excluded
ATRX	1	LoF	1	0	BLCA	Excluded
ATXN2	1	LoF	0	Inf	BLCA	Excluded
AUTS2	2	LoF	3	-0.584962500721156	BLCA	Excluded
AVIL	1	LoF	2	-1	BLCA	Excluded
AXDND1	1	LoF	2	-1	BLCA	Excluded
AXIN1	1	LoF	0	Inf	BLCA	Excluded
AZI2	3	LoF	1	1.58496250072116	BLCA	Recurrent
B3GALT4	2	LoF	1	1	BLCA	Excluded
B3GNT3	1	LoF	1	0	BLCA	Excluded
B4GALNT2	1	LoF	0	Inf	BLCA	Excluded
B4GALNT3	2	LoF	1	1	BLCA	Excluded
BAHD1	2	LoF	1	1	BLCA	Excluded
BAK1	1	LoF	0	Inf	BLCA	Excluded
BAP1	4	LoF	1	2	BLCA	Recurrent
BARHL2	1	LoF	2	-1	BLCA	Excluded
BARX1	1	LoF	0	Inf	BLCA	Excluded
BAZ1A	1	LoF	2	-1	BLCA	Excluded
BAZ1B	1	LoF	2	-1	BLCA	Excluded
BAZ2A	5	LoF	1	2.32192809488736	BLCA	Recurrent
BAZ2B	2	LoF	0	Inf	BLCA	Excluded
BBS4	1	LoF	1	0	BLCA	Excluded
BBS9	2	LoF	2	0	BLCA	Excluded
BBX	3	LoF	1	1.58496250072116	BLCA	Recurrent
BCAN	1	LoF	0	Inf	BLCA	Excluded
BCAS3	1	LoF	1	0	BLCA	Excluded
BCL2L11	1	LoF	0	Inf	BLCA	Excluded
BCL9	1	LoF	1	0	BLCA	Excluded
BCL9L	1	LoF	0	Inf	BLCA	Excluded
BCLAF1	3	LoF	1	1.58496250072116	BLCA	Recurrent
BCO2	1	LoF	0	Inf	BLCA	Excluded
BDKRB1	1	LoF	1	0	BLCA	Excluded
BDP1	2	LoF	2	0	BLCA	Excluded
BEND6	2	LoF	1	1	BLCA	Excluded
BFAR	1	LoF	0	Inf	BLCA	Excluded
BFSP1	2	LoF	0	Inf	BLCA	Excluded
BGLAP	1	LoF	0	Inf	BLCA	Excluded
BICC1	1	LoF	2	-1	BLCA	Excluded
BIN1	1	LoF	1	0	BLCA	Excluded
BIRC6	1	LoF	8	-3	BLCA	Excluded
BLVRB	1	LoF	0	Inf	BLCA	Excluded
BMF	1	LoF	0	Inf	BLCA	Excluded
BMP2K	2	LoF	1	1	BLCA	Excluded
BMP5	2	LoF	2	0	BLCA	Excluded
BMP8B	1	LoF	0	Inf	BLCA	Excluded
BMPR2	1	LoF	2	-1	BLCA	Excluded
BNC2	1	LoF	6	-2.58496250072116	BLCA	Excluded
BOD1L1	3	LoF	6	-1	BLCA	Excluded
BPHL	1	LoF	0	Inf	BLCA	Excluded
BPIFB3	1	LoF	1	0	BLCA	Excluded
BPIFB6	1	LoF	1	0	BLCA	Excluded
BRAF	2	LoF	2	0	BLCA	Excluded
BRAP	1	LoF	2	-1	BLCA	Excluded
BRAT1	1	LoF	2	-1	BLCA	Excluded
BRCA2	6	LoF	3	1	BLCA	Excluded
BRINP2	1	LoF	1	0	BLCA	Excluded
BRIP1	2	LoF	1	1	BLCA	Excluded
BRSK1	2	LoF	0	Inf	BLCA	Excluded
BRWD1	1	LoF	2	-1	BLCA	Excluded
BSN	2	LoF	2	0	BLCA	Excluded
BTAF1	1	LoF	3	-1.58496250072116	BLCA	Excluded
BTBD17	1	LoF	2	-1	BLCA	Excluded
BTBD2	1	LoF	0	Inf	BLCA	Excluded
BTBD7	1	LoF	0	Inf	BLCA	Excluded
BTBD9	1	LoF	1	0	BLCA	Excluded
BTF3	1	LoF	0	Inf	BLCA	Excluded
BTLA	1	LoF	0	Inf	BLCA	Excluded
BTN1A1	1	LoF	1	0	BLCA	Excluded
BTN3A1	1	LoF	1	0	BLCA	Excluded
BTNL3	2	LoF	1	1	BLCA	Excluded
BUB1	2	LoF	1	1	BLCA	Excluded
BUB3	1	LoF	0	Inf	BLCA	Excluded
BUD13	1	LoF	0	Inf	BLCA	Excluded
C10orf113	1	LoF	0	Inf	BLCA	Excluded
C10orf12	1	LoF	1	0	BLCA	Excluded
C10orf67	1	LoF	0	Inf	BLCA	Excluded
C10orf76	1	LoF	1	0	BLCA	Excluded
C10orf90	1	LoF	3	-1.58496250072116	BLCA	Excluded
C11orf58	1	LoF	0	Inf	BLCA	Excluded
C11orf85	1	LoF	1	0	BLCA	Excluded
C12orf4	1	LoF	0	Inf	BLCA	Excluded
C12orf40	1	LoF	1	0	BLCA	Excluded
C12orf45	1	LoF	0	Inf	BLCA	Excluded
C12orf76	1	LoF	0	Inf	BLCA	Excluded
C14orf142	1	LoF	2	-1	BLCA	Excluded
C14orf39	2	LoF	0	Inf	BLCA	Excluded
C15orf39	1	LoF	1	0	BLCA	Excluded
C16orf71	1	LoF	0	Inf	BLCA	Excluded
C16orf72	1	LoF	0	Inf	BLCA	Excluded
C17orf74	1	LoF	1	0	BLCA	Excluded
C17orf80	1	LoF	1	0	BLCA	Excluded
C18orf25	1	LoF	1	0	BLCA	Excluded
C18orf8	1	LoF	0	Inf	BLCA	Excluded
C19orf44	1	LoF	1	0	BLCA	Excluded
C1orf112	1	LoF	2	-1	BLCA	Excluded
C1orf116	1	LoF	0	Inf	BLCA	Excluded
C1orf127	2	LoF	1	1	BLCA	Excluded
C1orf158	1	LoF	1	0	BLCA	Excluded
C1orf177	1	LoF	1	0	BLCA	Excluded
C1orf56	1	LoF	2	-1	BLCA	Excluded
C1orf61	1	LoF	0	Inf	BLCA	Excluded
C1QBP	1	LoF	0	Inf	BLCA	Excluded
C20orf194	1	LoF	0	Inf	BLCA	Excluded
C22orf31	1	LoF	1	0	BLCA	Excluded
C2CD3	2	LoF	1	1	BLCA	Excluded
C2orf42	1	LoF	0	Inf	BLCA	Excluded
C3orf56	1	LoF	1	0	BLCA	Excluded
C3orf70	1	LoF	0	Inf	BLCA	Excluded
C4B	1	LoF	1	0	BLCA	Excluded
C4BPA	1	LoF	1	0	BLCA	Excluded
C5orf42	1	LoF	1	0	BLCA	Excluded
C6orf222	1	LoF	0	Inf	BLCA	Excluded
C6orf226	1	LoF	0	Inf	BLCA	Excluded
C6orf58	2	LoF	0	Inf	BLCA	Excluded
C6orf62	1	LoF	2	-1	BLCA	Excluded
C7orf26	1	LoF	3	-1.58496250072116	BLCA	Excluded
C7orf33	1	LoF	0	Inf	BLCA	Excluded
C7orf60	1	LoF	2	-1	BLCA	Excluded
C8orf34	3	LoF	0	Inf	BLCA	Recurrent
C8orf76	1	LoF	1	0	BLCA	Excluded
C9orf131	1	LoF	2	-1	BLCA	Excluded
C9orf40	1	LoF	0	Inf	BLCA	Excluded
CA8	1	LoF	0	Inf	BLCA	Excluded
CABS1	1	LoF	0	Inf	BLCA	Excluded
CACNA1A	1	LoF	5	-2.32192809488736	BLCA	Excluded
CACNA1E	1	LoF	5	-2.32192809488736	BLCA	Excluded
CACNA1F	1	LoF	2	-1	BLCA	Excluded
CACNA1G	1	LoF	2	-1	BLCA	Excluded
CACNA1H	2	LoF	2	0	BLCA	Excluded
CACNB1	1	LoF	2	-1	BLCA	Excluded
CACNB3	1	LoF	1	0	BLCA	Excluded
CACNG3	1	LoF	1	0	BLCA	Excluded
CAD	2	LoF	3	-0.584962500721156	BLCA	Excluded
CAMKK2	2	LoF	0	Inf	BLCA	Excluded
CAMLG	1	LoF	1	0	BLCA	Excluded
CAMSAP2	1	LoF	2	-1	BLCA	Excluded
CAMTA1	1	LoF	4	-2	BLCA	Excluded
CANX	2	LoF	2	0	BLCA	Excluded
CAP2	1	LoF	0	Inf	BLCA	Excluded
CAPG	1	LoF	0	Inf	BLCA	Excluded
CAPN7	1	LoF	1	0	BLCA	Excluded
CAPRIN1	1	LoF	0	Inf	BLCA	Excluded
CAPRIN2	1	LoF	1	0	BLCA	Excluded
CARD11	2	LoF	1	1	BLCA	Excluded
CARD6	1	LoF	2	-1	BLCA	Excluded
CARF	1	LoF	3	-1.58496250072116	BLCA	Excluded
CARS2	1	LoF	0	Inf	BLCA	Excluded
CASC4	1	LoF	0	Inf	BLCA	Excluded
CASC5	1	LoF	1	0	BLCA	Excluded
CASD1	1	LoF	1	0	BLCA	Excluded
CASKIN1	1	LoF	3	-1.58496250072116	BLCA	Excluded
CATSPERD	4	LoF	0	Inf	BLCA	Recurrent
CATSPERG	2	LoF	0	Inf	BLCA	Excluded
CBFA2T2	1	LoF	1	0	BLCA	Excluded
CBL	1	LoF	1	0	BLCA	Excluded
CBLB	1	LoF	1	0	BLCA	Excluded
CC2D1A	1	LoF	1	0	BLCA	Excluded
CCAR1	3	LoF	1	1.58496250072116	BLCA	Recurrent
CCBE1	1	LoF	0	Inf	BLCA	Excluded
CCDC108	1	LoF	1	0	BLCA	Excluded
CCDC110	2	LoF	1	1	BLCA	Excluded
CCDC116	1	LoF	1	0	BLCA	Excluded
CCDC132	1	LoF	0	Inf	BLCA	Excluded
CCDC141	1	LoF	0	Inf	BLCA	Excluded
CCDC158	3	LoF	1	1.58496250072116	BLCA	Recurrent
CCDC178	2	LoF	0	Inf	BLCA	Excluded
CCDC33	1	LoF	0	Inf	BLCA	Excluded
CCDC37	1	LoF	1	0	BLCA	Excluded
CCDC39	2	LoF	0	Inf	BLCA	Excluded
CCDC40	1	LoF	1	0	BLCA	Excluded
CCDC43	1	LoF	0	Inf	BLCA	Excluded
CCDC47	1	LoF	1	0	BLCA	Excluded
CCDC60	1	LoF	1	0	BLCA	Excluded
CCDC85A	1	LoF	1	0	BLCA	Excluded
CCDC87	2	LoF	1	1	BLCA	Excluded
CCKAR	1	LoF	0	Inf	BLCA	Excluded
CCL2	1	LoF	0	Inf	BLCA	Excluded
CCNDBP1	1	LoF	0	Inf	BLCA	Excluded
CCNJL	1	LoF	1	0	BLCA	Excluded
CCNL2	1	LoF	0	Inf	BLCA	Excluded
CCNT1	1	LoF	1	0	BLCA	Excluded
CCP110	1	LoF	1	0	BLCA	Excluded
CD163	1	LoF	1	0	BLCA	Excluded
CD1D	1	LoF	0	Inf	BLCA	Excluded
CD22	1	LoF	1	0	BLCA	Excluded
CD34	1	LoF	2	-1	BLCA	Excluded
CD5	1	LoF	1	0	BLCA	Excluded
CD53	1	LoF	0	Inf	BLCA	Excluded
CD79A	1	LoF	0	Inf	BLCA	Excluded
CD84	1	LoF	0	Inf	BLCA	Excluded
CDA	1	LoF	0	Inf	BLCA	Excluded
CDAN1	1	LoF	1	0	BLCA	Excluded
CDC20B	1	LoF	3	-1.58496250072116	BLCA	Excluded
CDC42EP4	1	LoF	3	-1.58496250072116	BLCA	Excluded
CDC6	2	LoF	0	Inf	BLCA	Excluded
CDCA7L	1	LoF	0	Inf	BLCA	Excluded
CDH1	5	LoF	3	0.736965594166206	BLCA	Excluded
CDH10	2	LoF	2	0	BLCA	Excluded
CDH11	1	LoF	4	-2	BLCA	Excluded
CDH15	1	LoF	1	0	BLCA	Excluded
CDH17	2	LoF	2	0	BLCA	Excluded
CDH19	1	LoF	2	-1	BLCA	Excluded
CDH5	1	LoF	4	-2	BLCA	Excluded
CDH8	3	LoF	3	0	BLCA	Excluded
CDK12	2	LoF	4	-1	BLCA	Excluded
CDK13	5	LoF	0	Inf	BLCA	Recurrent
CDK19	1	LoF	1	0	BLCA	Excluded
CDK5R1	1	LoF	0	Inf	BLCA	Excluded
CDK5RAP2	1	LoF	2	-1	BLCA	Excluded
CDK7	1	LoF	0	Inf	BLCA	Excluded
CDKN1B	2	LoF	0	Inf	BLCA	Excluded
CDKN2AIP	1	LoF	0	Inf	BLCA	Excluded
CDKN2AIPNL	1	LoF	0	Inf	BLCA	Excluded
CDR1	1	LoF	1	0	BLCA	Excluded
CDRT1	1	LoF	1	0	BLCA	Excluded
CDS2	1	LoF	0	Inf	BLCA	Excluded
CELSR3	2	LoF	3	-0.584962500721156	BLCA	Excluded
CENPE	4	LoF	3	0.415037499278844	BLCA	Excluded
CENPF	1	LoF	5	-2.32192809488736	BLCA	Excluded
CEP112	2	LoF	0	Inf	BLCA	Excluded
CEP192	3	LoF	4	-0.415037499278844	BLCA	Excluded
CEP290	1	LoF	0	Inf	BLCA	Excluded
CEP350	3	LoF	4	-0.415037499278844	BLCA	Excluded
CEP68	1	LoF	0	Inf	BLCA	Excluded
CEP70	1	LoF	1	0	BLCA	Excluded
CEP89	1	LoF	0	Inf	BLCA	Excluded
CEP97	3	LoF	4	-0.415037499278844	BLCA	Excluded
CES2	1	LoF	2	-1	BLCA	Excluded
CES3	1	LoF	2	-1	BLCA	Excluded
CES4A	2	LoF	0	Inf	BLCA	Excluded
CETP	1	LoF	2	-1	BLCA	Excluded
CFH	1	LoF	0	Inf	BLCA	Excluded
CFHR4	1	LoF	1	0	BLCA	Excluded
CFTR	1	LoF	2	-1	BLCA	Excluded
CHAT	1	LoF	3	-1.58496250072116	BLCA	Excluded
CHCHD3	1	LoF	0	Inf	BLCA	Excluded
CHD2	3	LoF	1	1.58496250072116	BLCA	Recurrent
CHD4	2	LoF	4	-1	BLCA	Excluded
CHD5	2	LoF	9	-2.16992500144231	BLCA	Excluded
CHD6	1	LoF	4	-2	BLCA	Excluded
CHD7	2	LoF	5	-1.32192809488736	BLCA	Excluded
CHD8	3	LoF	4	-0.415037499278844	BLCA	Excluded
CHFR	1	LoF	4	-2	BLCA	Excluded
CHGA	1	LoF	1	0	BLCA	Excluded
CHKA	1	LoF	0	Inf	BLCA	Excluded
CHKB	1	LoF	1	0	BLCA	Excluded
CHMP4B	1	LoF	0	Inf	BLCA	Excluded
CHODL	1	LoF	0	Inf	BLCA	Excluded
CHRD	1	LoF	1	0	BLCA	Excluded
CHRNA9	1	LoF	1	0	BLCA	Excluded
CHRNB2	1	LoF	2	-1	BLCA	Excluded
CHRNG	1	LoF	1	0	BLCA	Excluded
CIAO1	1	LoF	0	Inf	BLCA	Excluded
CKAP4	1	LoF	0	Inf	BLCA	Excluded
CKAP5	1	LoF	4	-2	BLCA	Excluded
CLASP1	1	LoF	2	-1	BLCA	Excluded
CLASP2	1	LoF	0	Inf	BLCA	Excluded
CLC	1	LoF	0	Inf	BLCA	Excluded
CLCA4	3	LoF	1	1.58496250072116	BLCA	Recurrent
CLEC10A	2	LoF	1	1	BLCA	Excluded
CLEC16A	1	LoF	1	0	BLCA	Excluded
CLIC5	1	LoF	1	0	BLCA	Excluded
CLMN	1	LoF	2	-1	BLCA	Excluded
CLOCK	2	LoF	1	1	BLCA	Excluded
CLPB	2	LoF	2	0	BLCA	Excluded
CLSPN	1	LoF	1	0	BLCA	Excluded
CLSTN2	3	LoF	0	Inf	BLCA	Recurrent
CLTA	1	LoF	0	Inf	BLCA	Excluded
CLUAP1	1	LoF	0	Inf	BLCA	Excluded
CLVS2	1	LoF	1	0	BLCA	Excluded
CMAS	1	LoF	2	-1	BLCA	Excluded
CMSS1	1	LoF	0	Inf	BLCA	Excluded
CMTR2	1	LoF	2	-1	BLCA	Excluded
CNGB1	1	LoF	1	0	BLCA	Excluded
CNIH4	1	LoF	0	Inf	BLCA	Excluded
CNKSR2	2	LoF	0	Inf	BLCA	Excluded
CNOT1	8	LoF	3	1.41503749927884	BLCA	Recurrent
CNOT2	1	LoF	0	Inf	BLCA	Excluded
CNTLN	1	LoF	1	0	BLCA	Excluded
CNTNAP4	1	LoF	2	-1	BLCA	Excluded
COG2	1	LoF	0	Inf	BLCA	Excluded
COG7	1	LoF	0	Inf	BLCA	Excluded
COG8	1	LoF	0	Inf	BLCA	Excluded
COL11A1	1	LoF	1	0	BLCA	Excluded
COL12A1	2	LoF	5	-1.32192809488736	BLCA	Excluded
COL14A1	1	LoF	2	-1	BLCA	Excluded
COL15A1	1	LoF	0	Inf	BLCA	Excluded
COL16A1	1	LoF	3	-1.58496250072116	BLCA	Excluded
COL17A1	1	LoF	0	Inf	BLCA	Excluded
COL19A1	1	LoF	1	0	BLCA	Excluded
COL1A2	1	LoF	1	0	BLCA	Excluded
COL21A1	1	LoF	1	0	BLCA	Excluded
COL25A1	2	LoF	1	1	BLCA	Excluded
COL28A1	2	LoF	1	1	BLCA	Excluded
COL3A1	2	LoF	2	0	BLCA	Excluded
COL4A4	3	LoF	2	0.584962500721156	BLCA	Excluded
COL5A2	1	LoF	1	0	BLCA	Excluded
COL5A3	1	LoF	3	-1.58496250072116	BLCA	Excluded
COL6A2	1	LoF	4	-2	BLCA	Excluded
COL6A6	2	LoF	7	-1.8073549220576	BLCA	Excluded
COL7A1	3	LoF	3	0	BLCA	Excluded
COL9A1	1	LoF	5	-2.32192809488736	BLCA	Excluded
COL9A2	1	LoF	0	Inf	BLCA	Excluded
COLEC12	1	LoF	0	Inf	BLCA	Excluded
COMT	3	LoF	2	0.584962500721156	BLCA	Excluded
COPG1	1	LoF	4	-2	BLCA	Excluded
COQ2	1	LoF	0	Inf	BLCA	Excluded
COQ9	1	LoF	0	Inf	BLCA	Excluded
CORIN	1	LoF	1	0	BLCA	Excluded
CORO1A	1	LoF	0	Inf	BLCA	Excluded
CORO6	1	LoF	1	0	BLCA	Excluded
COX6A1	1	LoF	1	0	BLCA	Excluded
CPA2	1	LoF	1	0	BLCA	Excluded
CPA4	1	LoF	0	Inf	BLCA	Excluded
CPB2	2	LoF	1	1	BLCA	Excluded
CPD	1	LoF	1	0	BLCA	Excluded
CPE	1	LoF	0	Inf	BLCA	Excluded
CPEB4	1	LoF	0	Inf	BLCA	Excluded
CPSF1	1	LoF	1	0	BLCA	Excluded
CPSF2	1	LoF	2	-1	BLCA	Excluded
CPSF4	1	LoF	0	Inf	BLCA	Excluded
CPZ	1	LoF	0	Inf	BLCA	Excluded
CRB1	1	LoF	4	-2	BLCA	Excluded
CREB5	3	LoF	3	0	BLCA	Excluded
CREBBP	18	LoF	5	1.84799690655495	BLCA	Recurrent
CREM	1	LoF	0	Inf	BLCA	Excluded
CRHR1	1	LoF	1	0	BLCA	Excluded
CRISPLD1	1	LoF	1	0	BLCA	Excluded
CRTC3	1	LoF	0	Inf	BLCA	Excluded
CRX	1	LoF	0	Inf	BLCA	Excluded
CRYBB1	1	LoF	1	0	BLCA	Excluded
CRYGD	1	LoF	0	Inf	BLCA	Excluded
CRYM	1	LoF	0	Inf	BLCA	Excluded
CS	1	LoF	1	0	BLCA	Excluded
CSE1L	1	LoF	3	-1.58496250072116	BLCA	Excluded
CSF2RB	1	LoF	2	-1	BLCA	Excluded
CSGALNACT2	1	LoF	1	0	BLCA	Excluded
CSH2	1	LoF	0	Inf	BLCA	Excluded
CSN1S1	1	LoF	0	Inf	BLCA	Excluded
CSPG5	1	LoF	1	0	BLCA	Excluded
CSRNP2	1	LoF	1	0	BLCA	Excluded
CSRNP3	1	LoF	0	Inf	BLCA	Excluded
CST11	2	LoF	1	1	BLCA	Excluded
CST9	1	LoF	0	Inf	BLCA	Excluded
CTC1	1	LoF	2	-1	BLCA	Excluded
CTCF	4	LoF	1	2	BLCA	Recurrent
CTDP1	1	LoF	0	Inf	BLCA	Excluded
CTDSP1	1	LoF	0	Inf	BLCA	Excluded
CTF1	1	LoF	0	Inf	BLCA	Excluded
CTNNA3	1	LoF	0	Inf	BLCA	Excluded
CTNNBL1	1	LoF	0	Inf	BLCA	Excluded
CTNND1	2	LoF	0	Inf	BLCA	Excluded
CTNND2	1	LoF	5	-2.32192809488736	BLCA	Excluded
CTSF	1	LoF	0	Inf	BLCA	Excluded
CTTNBP2	2	LoF	0	Inf	BLCA	Excluded
CTXN3	1	LoF	0	Inf	BLCA	Excluded
CUBN	4	LoF	8	-1	BLCA	Excluded
CUL1	1	LoF	1	0	BLCA	Excluded
CUX2	1	LoF	1	0	BLCA	Excluded
CWC27	1	LoF	1	0	BLCA	Excluded
CWF19L2	1	LoF	0	Inf	BLCA	Excluded
CXADR	1	LoF	1	0	BLCA	Excluded
CXorf38	1	LoF	0	Inf	BLCA	Excluded
CXorf57	1	LoF	2	-1	BLCA	Excluded
CYBA	1	LoF	0	Inf	BLCA	Excluded
CYP24A1	1	LoF	1	0	BLCA	Excluded
CYP2C19	1	LoF	0	Inf	BLCA	Excluded
CYP46A1	2	LoF	0	Inf	BLCA	Excluded
CYP4A11	1	LoF	1	0	BLCA	Excluded
CYP4A22	1	LoF	1	0	BLCA	Excluded
CYP4X1	2	LoF	0	Inf	BLCA	Excluded
DAAM1	1	LoF	1	0	BLCA	Excluded
DACH1	3	LoF	0	Inf	BLCA	Recurrent
DACH2	1	LoF	0	Inf	BLCA	Excluded
DAGLB	1	LoF	2	-1	BLCA	Excluded
DALRD3	2	LoF	2	0	BLCA	Excluded
DARS2	1	LoF	0	Inf	BLCA	Excluded
DAZAP1	1	LoF	0	Inf	BLCA	Excluded
DBR1	1	LoF	1	0	BLCA	Excluded
DBT	1	LoF	0	Inf	BLCA	Excluded
DCAF12	1	LoF	1	0	BLCA	Excluded
DCAF17	1	LoF	2	-1	BLCA	Excluded
DCAF4L1	2	LoF	0	Inf	BLCA	Excluded
DCAF4L2	1	LoF	0	Inf	BLCA	Excluded
DCBLD2	1	LoF	2	-1	BLCA	Excluded
DCHS2	3	LoF	8	-1.41503749927884	BLCA	Excluded
DCK	1	LoF	1	0	BLCA	Excluded
DCLRE1A	4	LoF	1	2	BLCA	Recurrent
DCUN1D3	1	LoF	1	0	BLCA	Excluded
DDB1	1	LoF	0	Inf	BLCA	Excluded
DDB2	1	LoF	3	-1.58496250072116	BLCA	Excluded
DDX10	1	LoF	1	0	BLCA	Excluded
DDX19B	1	LoF	0	Inf	BLCA	Excluded
DDX20	2	LoF	3	-0.584962500721156	BLCA	Excluded
DDX39B	1	LoF	1	0	BLCA	Excluded
DDX3X	2	LoF	1	1	BLCA	Excluded
DDX4	2	LoF	1	1	BLCA	Excluded
DDX5	2	LoF	2	0	BLCA	Excluded
DDX50	1	LoF	0	Inf	BLCA	Excluded
DDX60	4	LoF	1	2	BLCA	Recurrent
DEFB124	1	LoF	0	Inf	BLCA	Excluded
DEFB128	1	LoF	0	Inf	BLCA	Excluded
DENND1C	1	LoF	2	-1	BLCA	Excluded
DENND2C	1	LoF	1	0	BLCA	Excluded
DENND5A	2	LoF	2	0	BLCA	Excluded
DENND5B	2	LoF	1	1	BLCA	Excluded
DEPDC1	1	LoF	0	Inf	BLCA	Excluded
DEPDC5	2	LoF	0	Inf	BLCA	Excluded
DESI1	1	LoF	0	Inf	BLCA	Excluded
DGKA	1	LoF	3	-1.58496250072116	BLCA	Excluded
DGKH	2	LoF	1	1	BLCA	Excluded
DHODH	1	LoF	0	Inf	BLCA	Excluded
DHRS7B	1	LoF	1	0	BLCA	Excluded
DHTKD1	1	LoF	2	-1	BLCA	Excluded
DHX15	3	LoF	0	Inf	BLCA	Recurrent
DHX16	1	LoF	1	0	BLCA	Excluded
DHX30	2	LoF	2	0	BLCA	Excluded
DHX34	1	LoF	1	0	BLCA	Excluded
DIP2B	2	LoF	1	1	BLCA	Excluded
DIRC2	1	LoF	1	0	BLCA	Excluded
DKK1	1	LoF	1	0	BLCA	Excluded
DKK2	1	LoF	1	0	BLCA	Excluded
DLG3	2	LoF	0	Inf	BLCA	Excluded
DLG5	1	LoF	5	-2.32192809488736	BLCA	Excluded
DLL1	1	LoF	0	Inf	BLCA	Excluded
DMD	5	LoF	7	-0.485426827170242	BLCA	Excluded
DMGDH	1	LoF	2	-1	BLCA	Excluded
DMRTA1	1	LoF	0	Inf	BLCA	Excluded
DNA2	1	LoF	0	Inf	BLCA	Excluded
DNAAF1	1	LoF	0	Inf	BLCA	Excluded
DNAJA2	1	LoF	0	Inf	BLCA	Excluded
DNAJB12	1	LoF	3	-1.58496250072116	BLCA	Excluded
DNAJB6	1	LoF	0	Inf	BLCA	Excluded
DNAJC13	3	LoF	6	-1	BLCA	Excluded
DNAJC16	1	LoF	3	-1.58496250072116	BLCA	Excluded
DNAJC24	1	LoF	0	Inf	BLCA	Excluded
DNAJC9	1	LoF	2	-1	BLCA	Excluded
DNER	1	LoF	1	0	BLCA	Excluded
DOCK2	2	LoF	6	-1.58496250072116	BLCA	Excluded
DOCK3	2	LoF	1	1	BLCA	Excluded
DOCK6	1	LoF	0	Inf	BLCA	Excluded
DOCK8	2	LoF	6	-1.58496250072116	BLCA	Excluded
DOPEY2	4	LoF	6	-0.584962500721156	BLCA	Excluded
DPEP3	1	LoF	0	Inf	BLCA	Excluded
DPF2	1	LoF	0	Inf	BLCA	Excluded
DPP6	1	LoF	1	0	BLCA	Excluded
DPYD	1	LoF	3	-1.58496250072116	BLCA	Excluded
DPYSL4	1	LoF	1	0	BLCA	Excluded
DRC1	1	LoF	1	0	BLCA	Excluded
DRGX	1	LoF	0	Inf	BLCA	Excluded
DSC3	2	LoF	1	1	BLCA	Excluded
DSCAM	1	LoF	3	-1.58496250072116	BLCA	Excluded
DSCC1	1	LoF	0	Inf	BLCA	Excluded
DSEL	1	LoF	1	0	BLCA	Excluded
DSG1	1	LoF	0	Inf	BLCA	Excluded
DSG2	2	LoF	2	0	BLCA	Excluded
DSP	3	LoF	7	-1.22239242133645	BLCA	Excluded
DST	6	LoF	7	-0.222392421336448	BLCA	Excluded
DTD2	1	LoF	0	Inf	BLCA	Excluded
DTNBP1	1	LoF	0	Inf	BLCA	Excluded
DUSP11	1	LoF	0	Inf	BLCA	Excluded
DUSP6	1	LoF	1	0	BLCA	Excluded
DUSP9	1	LoF	1	0	BLCA	Excluded
DZIP3	2	LoF	1	1	BLCA	Excluded
E2F2	1	LoF	0	Inf	BLCA	Excluded
E2F6	1	LoF	0	Inf	BLCA	Excluded
ECHDC1	1	LoF	0	Inf	BLCA	Excluded
ECI2	1	LoF	0	Inf	BLCA	Excluded
ECM2	1	LoF	2	-1	BLCA	Excluded
ECSIT	1	LoF	0	Inf	BLCA	Excluded
EDC3	2	LoF	0	Inf	BLCA	Excluded
EDEM1	2	LoF	4	-1	BLCA	Excluded
EDEM3	1	LoF	0	Inf	BLCA	Excluded
EDIL3	1	LoF	0	Inf	BLCA	Excluded
EEA1	1	LoF	1	0	BLCA	Excluded
EED	1	LoF	1	0	BLCA	Excluded
EEF2	1	LoF	3	-1.58496250072116	BLCA	Excluded
EFCAB5	1	LoF	2	-1	BLCA	Excluded
EFCAB6	1	LoF	2	-1	BLCA	Excluded
EFHD2	1	LoF	0	Inf	BLCA	Excluded
EFTUD2	1	LoF	2	-1	BLCA	Excluded
EGFLAM	1	LoF	1	0	BLCA	Excluded
EGR4	1	LoF	1	0	BLCA	Excluded
EHBP1L1	1	LoF	0	Inf	BLCA	Excluded
EHD4	1	LoF	3	-1.58496250072116	BLCA	Excluded
EIF2AK2	2	LoF	1	1	BLCA	Excluded
EIF2AK3	3	LoF	2	0.584962500721156	BLCA	Excluded
EIF2B1	1	LoF	0	Inf	BLCA	Excluded
EIF2B5	2	LoF	1	1	BLCA	Excluded
EIF3A	1	LoF	0	Inf	BLCA	Excluded
EIF3K	1	LoF	0	Inf	BLCA	Excluded
EIF4A3	2	LoF	0	Inf	BLCA	Excluded
EIF4E3	1	LoF	0	Inf	BLCA	Excluded
EIF4EBP2	1	LoF	0	Inf	BLCA	Excluded
EIF4H	1	LoF	1	0	BLCA	Excluded
EIF5	1	LoF	0	Inf	BLCA	Excluded
EIF5B	1	LoF	2	-1	BLCA	Excluded
ELAC1	1	LoF	0	Inf	BLCA	Excluded
ELF1	1	LoF	3	-1.58496250072116	BLCA	Excluded
ELF3	3	LoF	1	1.58496250072116	BLCA	Recurrent
ELK4	1	LoF	0	Inf	BLCA	Excluded
ELL3	1	LoF	0	Inf	BLCA	Excluded
ELMO2	1	LoF	1	0	BLCA	Excluded
ELMOD2	1	LoF	0	Inf	BLCA	Excluded
EML4	1	LoF	1	0	BLCA	Excluded
ENAM	1	LoF	0	Inf	BLCA	Excluded
ENG	1	LoF	3	-1.58496250072116	BLCA	Excluded
ENGASE	1	LoF	1	0	BLCA	Excluded
ENOPH1	1	LoF	0	Inf	BLCA	Excluded
ENOX2	1	LoF	0	Inf	BLCA	Excluded
ENPEP	3	LoF	0	Inf	BLCA	Recurrent
ENPP7	1	LoF	2	-1	BLCA	Excluded
ENTPD2	2	LoF	1	1	BLCA	Excluded
EP300	17	LoF	4	2.08746284125034	BLCA	Recurrent
EP400	4	LoF	5	-0.321928094887362	BLCA	Excluded
EPB41L2	3	LoF	3	0	BLCA	Excluded
EPB41L4A	2	LoF	2	0	BLCA	Excluded
EPHA2	2	LoF	1	1	BLCA	Excluded
EPHA3	1	LoF	3	-1.58496250072116	BLCA	Excluded
EPHA4	1	LoF	0	Inf	BLCA	Excluded
EPHA6	1	LoF	1	0	BLCA	Excluded
EPHA7	3	LoF	1	1.58496250072116	BLCA	Recurrent
EPRS	2	LoF	0	Inf	BLCA	Excluded
EPS15	1	LoF	2	-1	BLCA	Excluded
EPS8	6	LoF	1	2.58496250072116	BLCA	Recurrent
EPS8L1	1	LoF	1	0	BLCA	Excluded
ERCC6	2	LoF	1	1	BLCA	Excluded
ERGIC1	1	LoF	0	Inf	BLCA	Excluded
ERICH1	2	LoF	0	Inf	BLCA	Excluded
ERO1LB	1	LoF	0	Inf	BLCA	Excluded
ESCO1	1	LoF	0	Inf	BLCA	Excluded
ESPL1	3	LoF	4	-0.415037499278844	BLCA	Excluded
ETV5	1	LoF	0	Inf	BLCA	Excluded
ETV6	1	LoF	0	Inf	BLCA	Excluded
EVPL	1	LoF	4	-2	BLCA	Excluded
EVX2	1	LoF	0	Inf	BLCA	Excluded
EXD3	1	LoF	0	Inf	BLCA	Excluded
EXOC3	1	LoF	2	-1	BLCA	Excluded
EXOC5	2	LoF	0	Inf	BLCA	Excluded
EXOC8	1	LoF	1	0	BLCA	Excluded
EXOSC10	2	LoF	0	Inf	BLCA	Excluded
EXOSC8	1	LoF	0	Inf	BLCA	Excluded
EXT1	1	LoF	3	-1.58496250072116	BLCA	Excluded
EYA1	1	LoF	0	Inf	BLCA	Excluded
F13B	1	LoF	1	0	BLCA	Excluded
F5	1	LoF	5	-2.32192809488736	BLCA	Excluded
F8	1	LoF	5	-2.32192809488736	BLCA	Excluded
FADS1	1	LoF	1	0	BLCA	Excluded
FADS3	1	LoF	1	0	BLCA	Excluded
FAF1	1	LoF	2	-1	BLCA	Excluded
FAM105A	1	LoF	2	-1	BLCA	Excluded
FAM111B	3	LoF	0	Inf	BLCA	Recurrent
FAM117B	1	LoF	2	-1	BLCA	Excluded
FAM120A	4	LoF	1	2	BLCA	Recurrent
FAM120AOS	1	LoF	0	Inf	BLCA	Excluded
FAM120C	1	LoF	0	Inf	BLCA	Excluded
FAM129A	1	LoF	1	0	BLCA	Excluded
FAM132A	1	LoF	0	Inf	BLCA	Excluded
FAM134B	3	LoF	0	Inf	BLCA	Recurrent
FAM13A	1	LoF	1	0	BLCA	Excluded
FAM150B	1	LoF	0	Inf	BLCA	Excluded
FAM155A	1	LoF	2	-1	BLCA	Excluded
FAM166A	1	LoF	0	Inf	BLCA	Excluded
FAM171A1	1	LoF	0	Inf	BLCA	Excluded
FAM174A	1	LoF	1	0	BLCA	Excluded
FAM175B	2	LoF	0	Inf	BLCA	Excluded
FAM179B	1	LoF	3	-1.58496250072116	BLCA	Excluded
FAM181A	1	LoF	1	0	BLCA	Excluded
FAM184A	1	LoF	2	-1	BLCA	Excluded
FAM188A	1	LoF	0	Inf	BLCA	Excluded
FAM193A	1	LoF	3	-1.58496250072116	BLCA	Excluded
FAM19A4	1	LoF	0	Inf	BLCA	Excluded
FAM208B	1	LoF	0	Inf	BLCA	Excluded
FAM20B	1	LoF	0	Inf	BLCA	Excluded
FAM217B	2	LoF	0	Inf	BLCA	Excluded
FAM219A	1	LoF	0	Inf	BLCA	Excluded
FAM3C	1	LoF	0	Inf	BLCA	Excluded
FAM3D	1	LoF	0	Inf	BLCA	Excluded
FAM47A	1	LoF	1	0	BLCA	Excluded
FAM49A	1	LoF	1	0	BLCA	Excluded
FAM50A	1	LoF	0	Inf	BLCA	Excluded
FAM53B	1	LoF	0	Inf	BLCA	Excluded
FAM71A	1	LoF	3	-1.58496250072116	BLCA	Excluded
FAM71F1	1	LoF	1	0	BLCA	Excluded
FAM78B	1	LoF	0	Inf	BLCA	Excluded
FAM91A1	2	LoF	6	-1.58496250072116	BLCA	Excluded
FANCE	1	LoF	1	0	BLCA	Excluded
FANCF	1	LoF	1	0	BLCA	Excluded
FANCG	1	LoF	1	0	BLCA	Excluded
FANCM	2	LoF	4	-1	BLCA	Excluded
FAP	2	LoF	0	Inf	BLCA	Excluded
FAR1	1	LoF	1	0	BLCA	Excluded
FAT2	1	LoF	5	-2.32192809488736	BLCA	Excluded
FAT3	1	LoF	11	-3.4594316186373	BLCA	Excluded
FAT4	11	LoF	9	0.289506617194985	BLCA	Excluded
FBN1	1	LoF	4	-2	BLCA	Excluded
FBXL20	1	LoF	0	Inf	BLCA	Excluded
FBXO10	1	LoF	1	0	BLCA	Excluded
FBXO16	1	LoF	0	Inf	BLCA	Excluded
FBXO25	1	LoF	0	Inf	BLCA	Excluded
FBXO30	1	LoF	0	Inf	BLCA	Excluded
FBXO33	1	LoF	0	Inf	BLCA	Excluded
FBXO42	1	LoF	3	-1.58496250072116	BLCA	Excluded
FBXO43	1	LoF	1	0	BLCA	Excluded
FBXO6	1	LoF	0	Inf	BLCA	Excluded
FBXW12	1	LoF	0	Inf	BLCA	Excluded
FBXW7	5	LoF	0	Inf	BLCA	Recurrent
FBXW9	1	LoF	2	-1	BLCA	Excluded
FCAR	1	LoF	1	0	BLCA	Excluded
FEM1A	1	LoF	3	-1.58496250072116	BLCA	Excluded
FER	1	LoF	1	0	BLCA	Excluded
FGD4	1	LoF	0	Inf	BLCA	Excluded
FGD6	2	LoF	0	Inf	BLCA	Excluded
FGF10	1	LoF	0	Inf	BLCA	Excluded
FH	1	LoF	1	0	BLCA	Excluded
FHL3	1	LoF	0	Inf	BLCA	Excluded
FILIP1	2	LoF	3	-0.584962500721156	BLCA	Excluded
FLG	3	LoF	5	-0.736965594166206	BLCA	Excluded
FLG2	3	LoF	2	0.584962500721156	BLCA	Excluded
FLI1	1	LoF	1	0	BLCA	Excluded
FLNC	2	LoF	4	-1	BLCA	Excluded
FLRT1	1	LoF	1	0	BLCA	Excluded
FLRT2	3	LoF	2	0.584962500721156	BLCA	Excluded
FMNL3	1	LoF	1	0	BLCA	Excluded
FMR1NB	1	LoF	1	0	BLCA	Excluded
FNDC1	2	LoF	5	-1.32192809488736	BLCA	Excluded
FNDC3B	1	LoF	2	-1	BLCA	Excluded
FNDC7	1	LoF	1	0	BLCA	Excluded
FNIP1	1	LoF	2	-1	BLCA	Excluded
FOS	1	LoF	2	-1	BLCA	Excluded
FOXA3	1	LoF	3	-1.58496250072116	BLCA	Excluded
FOXD2	1	LoF	0	Inf	BLCA	Excluded
FOXE1	1	LoF	0	Inf	BLCA	Excluded
FOXQ1	1	LoF	3	-1.58496250072116	BLCA	Excluded
FOXR1	1	LoF	0	Inf	BLCA	Excluded
FRAS1	2	LoF	1	1	BLCA	Excluded
FREM2	3	LoF	2	0.584962500721156	BLCA	Excluded
FRMD4A	2	LoF	1	1	BLCA	Excluded
FRMD4B	1	LoF	0	Inf	BLCA	Excluded
FRMD6	1	LoF	0	Inf	BLCA	Excluded
FRMPD2	1	LoF	1	0	BLCA	Excluded
FRRS1	1	LoF	1	0	BLCA	Excluded
FRY	3	LoF	8	-1.41503749927884	BLCA	Excluded
FRYL	1	LoF	5	-2.32192809488736	BLCA	Excluded
FSCB	2	LoF	1	1	BLCA	Excluded
FSHR	1	LoF	3	-1.58496250072116	BLCA	Excluded
FSTL1	2	LoF	0	Inf	BLCA	Excluded
FSTL5	1	LoF	3	-1.58496250072116	BLCA	Excluded
FTH1	1	LoF	0	Inf	BLCA	Excluded
FTSJ3	1	LoF	2	-1	BLCA	Excluded
FUS	3	LoF	0	Inf	BLCA	Recurrent
FUT8	1	LoF	1	0	BLCA	Excluded
FXR1	1	LoF	1	0	BLCA	Excluded
FYCO1	2	LoF	3	-0.584962500721156	BLCA	Excluded
FZR1	1	LoF	0	Inf	BLCA	Excluded
G2E3	1	LoF	1	0	BLCA	Excluded
G6PC3	2	LoF	0	Inf	BLCA	Excluded
GAA	1	LoF	0	Inf	BLCA	Excluded
GAB4	2	LoF	2	0	BLCA	Excluded
GABPA	1	LoF	0	Inf	BLCA	Excluded
GABRA6	1	LoF	0	Inf	BLCA	Excluded
GABRB2	1	LoF	2	-1	BLCA	Excluded
GABRB3	1	LoF	1	0	BLCA	Excluded
GABRG1	1	LoF	0	Inf	BLCA	Excluded
GABRG3	1	LoF	0	Inf	BLCA	Excluded
GALC	1	LoF	1	0	BLCA	Excluded
GALNT15	3	LoF	1	1.58496250072116	BLCA	Recurrent
GALNT3	1	LoF	1	0	BLCA	Excluded
GANC	1	LoF	1	0	BLCA	Excluded
GAPVD1	1	LoF	1	0	BLCA	Excluded
GAS7	1	LoF	0	Inf	BLCA	Excluded
GBP1	1	LoF	0	Inf	BLCA	Excluded
GBP5	1	LoF	0	Inf	BLCA	Excluded
GBP6	1	LoF	0	Inf	BLCA	Excluded
GBP7	1	LoF	0	Inf	BLCA	Excluded
GBX2	1	LoF	0	Inf	BLCA	Excluded
GCA	1	LoF	1	0	BLCA	Excluded
GCC2	1	LoF	1	0	BLCA	Excluded
GCM2	1	LoF	2	-1	BLCA	Excluded
GCN1L1	2	LoF	2	0	BLCA	Excluded
GEMIN2	1	LoF	0	Inf	BLCA	Excluded
GEMIN5	1	LoF	3	-1.58496250072116	BLCA	Excluded
GFM1	2	LoF	1	1	BLCA	Excluded
GFM2	1	LoF	1	0	BLCA	Excluded
GFRAL	1	LoF	0	Inf	BLCA	Excluded
GGNBP2	1	LoF	0	Inf	BLCA	Excluded
GHSR	2	LoF	1	1	BLCA	Excluded
GIF	1	LoF	1	0	BLCA	Excluded
GIMAP2	1	LoF	1	0	BLCA	Excluded
GIMAP8	1	LoF	1	0	BLCA	Excluded
GINM1	1	LoF	0	Inf	BLCA	Excluded
GINS1	1	LoF	0	Inf	BLCA	Excluded
GINS4	1	LoF	0	Inf	BLCA	Excluded
GIPR	1	LoF	3	-1.58496250072116	BLCA	Excluded
GK5	1	LoF	0	Inf	BLCA	Excluded
GLDC	1	LoF	1	0	BLCA	Excluded
GLI3	2	LoF	6	-1.58496250072116	BLCA	Excluded
GLTSCR1L	1	LoF	1	0	BLCA	Excluded
GLYR1	1	LoF	1	0	BLCA	Excluded
GMPS	1	LoF	1	0	BLCA	Excluded
GNAI1	1	LoF	1	0	BLCA	Excluded
GNB2L1	1	LoF	0	Inf	BLCA	Excluded
GNB4	1	LoF	1	0	BLCA	Excluded
GNE	1	LoF	0	Inf	BLCA	Excluded
GNG11	1	LoF	0	Inf	BLCA	Excluded
GNL2	1	LoF	0	Inf	BLCA	Excluded
GNL3	1	LoF	1	0	BLCA	Excluded
GOLGA2	2	LoF	1	1	BLCA	Excluded
GOLGA3	1	LoF	2	-1	BLCA	Excluded
GOLGA5	4	LoF	0	Inf	BLCA	Recurrent
GOLIM4	1	LoF	0	Inf	BLCA	Excluded
GOLPH3	1	LoF	0	Inf	BLCA	Excluded
GON4L	4	LoF	3	0.415037499278844	BLCA	Excluded
GPANK1	1	LoF	0	Inf	BLCA	Excluded
GPC2	1	LoF	0	Inf	BLCA	Excluded
GPC4	1	LoF	1	0	BLCA	Excluded
GPC5	2	LoF	2	0	BLCA	Excluded
GPD2	1	LoF	0	Inf	BLCA	Excluded
GPR107	1	LoF	0	Inf	BLCA	Excluded
GPR108	1	LoF	1	0	BLCA	Excluded
GPR149	1	LoF	3	-1.58496250072116	BLCA	Excluded
GPR158	2	LoF	3	-0.584962500721156	BLCA	Excluded
GPR171	2	LoF	1	1	BLCA	Excluded
GPR176	1	LoF	0	Inf	BLCA	Excluded
GPR22	1	LoF	1	0	BLCA	Excluded
GPR31	1	LoF	0	Inf	BLCA	Excluded
GPR82	1	LoF	0	Inf	BLCA	Excluded
GPRC5C	1	LoF	0	Inf	BLCA	Excluded
GPRC5D	1	LoF	2	-1	BLCA	Excluded
GPRC6A	1	LoF	1	0	BLCA	Excluded
GPS2	5	LoF	0	Inf	BLCA	Recurrent
GRB14	1	LoF	2	-1	BLCA	Excluded
GRIA4	1	LoF	3	-1.58496250072116	BLCA	Excluded
GRIK3	3	LoF	2	0.584962500721156	BLCA	Excluded
GRIN2D	1	LoF	4	-2	BLCA	Excluded
GRK5	1	LoF	0	Inf	BLCA	Excluded
GRM3	1	LoF	2	-1	BLCA	Excluded
GRM5	2	LoF	3	-0.584962500721156	BLCA	Excluded
GRM8	2	LoF	2	0	BLCA	Excluded
GSAP	1	LoF	4	-2	BLCA	Excluded
GSTM3	1	LoF	1	0	BLCA	Excluded
GSTM5	1	LoF	1	0	BLCA	Excluded
GTF2A1	1	LoF	0	Inf	BLCA	Excluded
GTF2A2	1	LoF	0	Inf	BLCA	Excluded
GTF2B	1	LoF	1	0	BLCA	Excluded
GTF2E2	1	LoF	0	Inf	BLCA	Excluded
GTF2H3	1	LoF	1	0	BLCA	Excluded
GTF2H4	1	LoF	0	Inf	BLCA	Excluded
GTF2I	1	LoF	1	0	BLCA	Excluded
GTF3C1	1	LoF	3	-1.58496250072116	BLCA	Excluded
GTPBP10	1	LoF	0	Inf	BLCA	Excluded
GUCY1A3	1	LoF	4	-2	BLCA	Excluded
GUCY2C	1	LoF	2	-1	BLCA	Excluded
GYG1	1	LoF	1	0	BLCA	Excluded
GYPA	1	LoF	0	Inf	BLCA	Excluded
GZF1	1	LoF	2	-1	BLCA	Excluded
GZMK	1	LoF	0	Inf	BLCA	Excluded
H3F3B	1	LoF	0	Inf	BLCA	Excluded
HACE1	2	LoF	0	Inf	BLCA	Excluded
HADHA	1	LoF	0	Inf	BLCA	Excluded
HAL	1	LoF	3	-1.58496250072116	BLCA	Excluded
HAUS3	1	LoF	0	Inf	BLCA	Excluded
HAUS4	1	LoF	0	Inf	BLCA	Excluded
HAUS7	1	LoF	0	Inf	BLCA	Excluded
HAUS8	1	LoF	0	Inf	BLCA	Excluded
HCK	1	LoF	2	-1	BLCA	Excluded
HCN1	2	LoF	4	-1	BLCA	Excluded
HDAC1	1	LoF	1	0	BLCA	Excluded
HDAC6	1	LoF	1	0	BLCA	Excluded
HDGFRP2	1	LoF	1	0	BLCA	Excluded
HDLBP	1	LoF	2	-1	BLCA	Excluded
HDX	1	LoF	0	Inf	BLCA	Excluded
HEATR1	1	LoF	2	-1	BLCA	Excluded
HECTD4	2	LoF	6	-1.58496250072116	BLCA	Excluded
HECW1	1	LoF	1	0	BLCA	Excluded
HELB	1	LoF	1	0	BLCA	Excluded
HELQ	1	LoF	2	-1	BLCA	Excluded
HERC2	1	LoF	8	-3	BLCA	Excluded
HERC4	1	LoF	0	Inf	BLCA	Excluded
HERC6	1	LoF	1	0	BLCA	Excluded
HFM1	3	LoF	0	Inf	BLCA	Recurrent
HGD	1	LoF	0	Inf	BLCA	Excluded
HGF	2	LoF	1	1	BLCA	Excluded
HHLA2	1	LoF	0	Inf	BLCA	Excluded
HIGD2A	1	LoF	1	0	BLCA	Excluded
HINFP	1	LoF	2	-1	BLCA	Excluded
HIP1	1	LoF	1	0	BLCA	Excluded
HIPK3	1	LoF	1	0	BLCA	Excluded
HIRA	1	LoF	3	-1.58496250072116	BLCA	Excluded
HIST1H1B	1	LoF	1	0	BLCA	Excluded
HIST1H2AK	1	LoF	0	Inf	BLCA	Excluded
HIST1H2BI	1	LoF	0	Inf	BLCA	Excluded
HIST1H2BL	1	LoF	3	-1.58496250072116	BLCA	Excluded
HIST1H4K	1	LoF	0	Inf	BLCA	Excluded
HIVEP1	2	LoF	3	-0.584962500721156	BLCA	Excluded
HK2	1	LoF	1	0	BLCA	Excluded
HK3	2	LoF	1	1	BLCA	Excluded
HKDC1	1	LoF	3	-1.58496250072116	BLCA	Excluded
HLA-A	1	LoF	0	Inf	BLCA	Excluded
HLA-B	1	LoF	0	Inf	BLCA	Excluded
HLA-C	1	LoF	2	-1	BLCA	Excluded
HMCN1	8	LoF	12	-0.584962500721156	BLCA	Excluded
HMGCR	2	LoF	0	Inf	BLCA	Excluded
HNRNPM	1	LoF	2	-1	BLCA	Excluded
HOOK1	2	LoF	0	Inf	BLCA	Excluded
HOXB1	1	LoF	3	-1.58496250072116	BLCA	Excluded
HOXD10	1	LoF	0	Inf	BLCA	Excluded
HPS1	1	LoF	2	-1	BLCA	Excluded
HPS3	1	LoF	1	0	BLCA	Excluded
HPX	1	LoF	1	0	BLCA	Excluded
HRASLS	1	LoF	0	Inf	BLCA	Excluded
HRC	1	LoF	3	-1.58496250072116	BLCA	Excluded
HRNR	1	LoF	0	Inf	BLCA	Excluded
HS3ST2	1	LoF	1	0	BLCA	Excluded
HSPA9	1	LoF	1	0	BLCA	Excluded
HSPB3	1	LoF	0	Inf	BLCA	Excluded
HSPG2	3	LoF	7	-1.22239242133645	BLCA	Excluded
HTR2B	1	LoF	1	0	BLCA	Excluded
HTR3B	1	LoF	0	Inf	BLCA	Excluded
HTRA2	1	LoF	1	0	BLCA	Excluded
IAH1	1	LoF	0	Inf	BLCA	Excluded
IARS2	1	LoF	0	Inf	BLCA	Excluded
IBSP	1	LoF	0	Inf	BLCA	Excluded
IBTK	1	LoF	1	0	BLCA	Excluded
ICAM2	1	LoF	0	Inf	BLCA	Excluded
ICAM5	2	LoF	0	Inf	BLCA	Excluded
ICMT	1	LoF	0	Inf	BLCA	Excluded
IDH3A	1	LoF	0	Inf	BLCA	Excluded
IDH3G	1	LoF	0	Inf	BLCA	Excluded
IER5	1	LoF	2	-1	BLCA	Excluded
IFI27L2	1	LoF	0	Inf	BLCA	Excluded
IFI30	1	LoF	0	Inf	BLCA	Excluded
IFIH1	1	LoF	1	0	BLCA	Excluded
IFIT2	1	LoF	0	Inf	BLCA	Excluded
IFNLR1	1	LoF	0	Inf	BLCA	Excluded
IFT88	2	LoF	0	Inf	BLCA	Excluded
IGDCC4	1	LoF	0	Inf	BLCA	Excluded
IGF1R	1	LoF	2	-1	BLCA	Excluded
IGF2R	1	LoF	0	Inf	BLCA	Excluded
IGHA2	1	LoF	0	Inf	BLCA	Excluded
IGHG2	2	LoF	3	-0.584962500721156	BLCA	Excluded
IGLV4-69	1	LoF	0	Inf	BLCA	Excluded
IGSF11	1	LoF	2	-1	BLCA	Excluded
IGSF21	1	LoF	0	Inf	BLCA	Excluded
IK	1	LoF	0	Inf	BLCA	Excluded
IKBKAP	1	LoF	0	Inf	BLCA	Excluded
IKBKB	2	LoF	2	0	BLCA	Excluded
IKBKE	1	LoF	2	-1	BLCA	Excluded
IKZF1	1	LoF	5	-2.32192809488736	BLCA	Excluded
IL10RA	3	LoF	1	1.58496250072116	BLCA	Recurrent
IL12RB2	1	LoF	1	0	BLCA	Excluded
IL17F	1	LoF	0	Inf	BLCA	Excluded
IL17RC	2	LoF	3	-0.584962500721156	BLCA	Excluded
IL17RE	1	LoF	1	0	BLCA	Excluded
IL1A	1	LoF	0	Inf	BLCA	Excluded
IL20RA	1	LoF	1	0	BLCA	Excluded
IL21R	1	LoF	0	Inf	BLCA	Excluded
IL23A	1	LoF	0	Inf	BLCA	Excluded
IL27RA	1	LoF	2	-1	BLCA	Excluded
IL36A	1	LoF	0	Inf	BLCA	Excluded
IL3RA	2	LoF	1	1	BLCA	Excluded
IMMT	1	LoF	0	Inf	BLCA	Excluded
IMPG1	1	LoF	0	Inf	BLCA	Excluded
INADL	2	LoF	4	-1	BLCA	Excluded
ING3	1	LoF	1	0	BLCA	Excluded
INO80E	1	LoF	0	Inf	BLCA	Excluded
INSIG1	1	LoF	1	0	BLCA	Excluded
INSR	1	LoF	5	-2.32192809488736	BLCA	Excluded
INTS1	1	LoF	1	0	BLCA	Excluded
INTS8	2	LoF	0	Inf	BLCA	Excluded
IPO13	1	LoF	1	0	BLCA	Excluded
IPO8	2	LoF	3	-0.584962500721156	BLCA	Excluded
IPO9	1	LoF	0	Inf	BLCA	Excluded
IQCB1	1	LoF	0	Inf	BLCA	Excluded
IQGAP1	2	LoF	4	-1	BLCA	Excluded
IQGAP2	1	LoF	1	0	BLCA	Excluded
IQGAP3	1	LoF	2	-1	BLCA	Excluded
IRAK2	1	LoF	1	0	BLCA	Excluded
IREB2	1	LoF	1	0	BLCA	Excluded
IRS4	1	LoF	5	-2.32192809488736	BLCA	Excluded
IRX1	1	LoF	2	-1	BLCA	Excluded
ITFG1	1	LoF	0	Inf	BLCA	Excluded
ITGA1	1	LoF	0	Inf	BLCA	Excluded
ITGA11	1	LoF	3	-1.58496250072116	BLCA	Excluded
ITGA4	3	LoF	1	1.58496250072116	BLCA	Recurrent
ITGA8	2	LoF	3	-0.584962500721156	BLCA	Excluded
ITGA9	1	LoF	3	-1.58496250072116	BLCA	Excluded
ITGAE	1	LoF	4	-2	BLCA	Excluded
ITGAL	2	LoF	2	0	BLCA	Excluded
ITGAV	1	LoF	5	-2.32192809488736	BLCA	Excluded
ITGB4	1	LoF	2	-1	BLCA	Excluded
ITGBL1	1	LoF	0	Inf	BLCA	Excluded
ITIH1	2	LoF	2	0	BLCA	Excluded
ITK	1	LoF	0	Inf	BLCA	Excluded
ITPR2	3	LoF	5	-0.736965594166206	BLCA	Excluded
ITSN2	4	LoF	2	1	BLCA	Excluded
IVNS1ABP	2	LoF	0	Inf	BLCA	Excluded
IWS1	1	LoF	2	-1	BLCA	Excluded
JAG1	1	LoF	5	-2.32192809488736	BLCA	Excluded
JAK1	1	LoF	1	0	BLCA	Excluded
JAK2	2	LoF	1	1	BLCA	Excluded
JMJD1C	4	LoF	0	Inf	BLCA	Recurrent
JMY	1	LoF	1	0	BLCA	Excluded
JRKL	1	LoF	1	0	BLCA	Excluded
KAL1	1	LoF	0	Inf	BLCA	Excluded
KAT7	1	LoF	0	Inf	BLCA	Excluded
KATNAL1	1	LoF	1	0	BLCA	Excluded
KBTBD12	1	LoF	0	Inf	BLCA	Excluded
KBTBD7	1	LoF	1	0	BLCA	Excluded
KCNA1	1	LoF	5	-2.32192809488736	BLCA	Excluded
KCNH1	1	LoF	5	-2.32192809488736	BLCA	Excluded
KCNH5	1	LoF	1	0	BLCA	Excluded
KCNH7	2	LoF	2	0	BLCA	Excluded
KCNH8	1	LoF	4	-2	BLCA	Excluded
KCNJ2	1	LoF	1	0	BLCA	Excluded
KCNJ3	2	LoF	0	Inf	BLCA	Excluded
KCNK18	1	LoF	0	Inf	BLCA	Excluded
KCNK2	1	LoF	0	Inf	BLCA	Excluded
KCNMB3	1	LoF	1	0	BLCA	Excluded
KCNN3	1	LoF	2	-1	BLCA	Excluded
KCNQ2	1	LoF	1	0	BLCA	Excluded
KCNQ3	1	LoF	0	Inf	BLCA	Excluded
KCNRG	1	LoF	2	-1	BLCA	Excluded
KCNT2	1	LoF	1	0	BLCA	Excluded
KCTD2	1	LoF	0	Inf	BLCA	Excluded
KCTD6	1	LoF	0	Inf	BLCA	Excluded
KCTD9	1	LoF	0	Inf	BLCA	Excluded
KDM1B	1	LoF	1	0	BLCA	Excluded
KDM2B	1	LoF	1	0	BLCA	Excluded
KDM3B	1	LoF	1	0	BLCA	Excluded
KDM4D	1	LoF	1	0	BLCA	Excluded
KDM5A	2	LoF	2	0	BLCA	Excluded
KDM5B	2	LoF	2	0	BLCA	Excluded
KDM6A	27	LoF	2	3.75488750216347	BLCA	Recurrent
KEAP1	1	LoF	2	-1	BLCA	Excluded
KHDC1	1	LoF	1	0	BLCA	Excluded
KHDC3L	1	LoF	0	Inf	BLCA	Excluded
KHDRBS2	3	LoF	0	Inf	BLCA	Recurrent
KIAA0195	2	LoF	3	-0.584962500721156	BLCA	Excluded
KIAA0232	2	LoF	1	1	BLCA	Excluded
KIAA0319	1	LoF	0	Inf	BLCA	Excluded
KIAA0430	3	LoF	2	0.584962500721156	BLCA	Excluded
KIAA0907	3	LoF	1	1.58496250072116	BLCA	Recurrent
KIAA1024	1	LoF	2	-1	BLCA	Excluded
KIAA1045	1	LoF	0	Inf	BLCA	Excluded
KIAA1109	3	LoF	7	-1.22239242133645	BLCA	Excluded
KIAA1210	1	LoF	0	Inf	BLCA	Excluded
KIAA1324L	2	LoF	2	0	BLCA	Excluded
KIAA1328	2	LoF	0	Inf	BLCA	Excluded
KIAA1407	1	LoF	1	0	BLCA	Excluded
KIAA1429	2	LoF	4	-1	BLCA	Excluded
KIAA1549	3	LoF	1	1.58496250072116	BLCA	Recurrent
KIAA1549L	2	LoF	2	0	BLCA	Excluded
KIAA1551	2	LoF	1	1	BLCA	Excluded
KIAA1614	1	LoF	1	0	BLCA	Excluded
KIAA1715	1	LoF	0	Inf	BLCA	Excluded
KIAA1841	3	LoF	0	Inf	BLCA	Recurrent
KIAA2018	1	LoF	1	0	BLCA	Excluded
KIAA2026	1	LoF	5	-2.32192809488736	BLCA	Excluded
KIDINS220	3	LoF	2	0.584962500721156	BLCA	Excluded
[truncated: 106,740 more rows]
