# Supplementary material for: Somatic mutations in early metazoan genes disrupt regulatory links between unicellular and multicellular genes in cancer
Source: eLife journal article supplement (doi:10.7554/elife.40947), 2019-02-25
Supplement: supp [file elife-40947-supp-v1.zip › elife_poa_e40947_Supplementary_File_2.txt]

Age	Mutation	Median	Upperquantile	Lowerquantile
UC	CNV	0.666666666666667	1	0.4
EM	CNV	0.384615384615385	0.49375	0.214518668466037
MM	CNV	0.6	0.684873949579832	0.352941176470588
UC	Point	0.514705882352941	2.46071428571429	0.454545454545455
EM	Point	0.831944444444444	3.33955223880597	0.535714285714286
MM	Point	0.306089743589744	0.552083333333333	0.269711538461539
