# Supplementary material for: Somatic mutations in early metazoan genes disrupt regulatory links between unicellular and multicellular genes in cancer
Source: eLife journal article supplement (doi:10.7554/elife.40947), 2019-02-25
Supplement: supp [file elife-40947-supp-v1.zip › elife_poa_e40947_Supplementary_File_3.txt]

Regulator	Regulator_class
A1BG	EM-t
AADAC	UC-t
ABCB1	EM-t
ABCB6	EM-t
ABCC1	UC-t
ABCC2	UC-t
ABL1	UC/EM-i
ACO1	MM-t
ACTA2	UC/EM-i
ACTL6A	UC/EM-i
ADAM17	EM-t
ADAR	UC-t
ADCY7	EM-t
ADIPOQ	NA
ADIPOR1	UC-t
ADIRF	EM-t
ADM	UC-t
ADORA2A	UC-t
ADORA2B	UC-t
ADRA2A	EM-t
ADRA2B	EM-t
ADRA2C	EM-t
ADRB1	UC-t
ADRB2	UC/EM-i
AES	UC/EM-i
AGAP2	EM-t
AGO1	NA
AGO2	UC-t
AGO3	NA
AGO4	NA
AGT	EM-t
AGTR1	EM-t
AGTR2	UC-t
AHR	UC/EM-i
AHRR	UC-t
AIM2	EM-t
AKAP13	EM-t
AKR1B10	EM-t
AKR1B1	UC/EM-i
AKT1	EM-t
AKT2	EM-t
ALDH1A1	UC/EM-i
ALDH2	NA
ALK	EM-t
ALOX15	UC/EM-i
ALX1	UC/EM-i
ALX4	NA
AMH	EM-t
AMN	EM-t
ANAPC10	EM-t
ANAPC11	EM-t
ANAPC15	EM-t
ANAPC16	EM-t
ANAPC1	EM-t
ANAPC2	EM-t
ANAPC4	EM-t
ANAPC5	EM-t
ANAPC7	EM-t
ANGPT1	NA
ANGPT2	NA
ANGPT4	EM-t
ANXA1	EM-t
AP1S1	UC/EM-i
APOA1	EM-t
APP	NA
APPL1	EM-t
AR	UC/EM-i
ARAF	EM-t
AREG	UC-t
ARHGEF17	UC-t
ARHGEF2	MM-t
ARL6IP5	EM-t
ARNT2	UC-t
ARNT	UC/EM-i
ARNTL2	EM-t
ARNTL	UC/EM-i
ARRB1	EM-t
ARRB2	UC/EM-i
ARTN	EM-t
ASAH2	EM-t
ASCL1	NA
ASH2L	EM-t
ATF1	UC/EM-i
ATF2	UC/EM-i
ATF3	UC/EM-i
ATF4	UC/EM-i
ATF5	EM-t
ATF6	UC/EM-i
ATF7	EM-t
ATG5	NA
ATG7	UC/EM-i
ATM	NA
ATP1B4	EM-t
ATP2A1	UC-t
ATP7B	UC/EM-i
ATR	UC-t
BACH1	UC/EM-i
BACH2	UC/EM-i
BATF3	MM-t
BCAR1	EM-t
BCL2	EM-t
BCL2L1	UC/EM-i
BCL3	EM-t
BCL6	EM-t
BCL9	EM-t
BCR	EM-t
BDNF	UC/EM-i
BECN1	NA
BHLHE40	UC-t
BHLHE41	EM-t
BID	NA
BIN1	UC-t
BIRC5	EM-t
BLVRA	UC/EM-i
BMF	EM-t
BMP2	EM-t
BMP4	EM-t
BMP6	EM-t
BMP7	EM-t
BMPR2	EM-t
BNIP3L	UC/EM-i
BPTF	UC/EM-i
BRAF	EM-t
BRCA1	UC/EM-i
BRD4	EM-t
BSG	EM-t
C5	EM-t
CA9	UC/EM-i
CALCA	UC/EM-i
CALCOCO1	MM-t
CALM1	UC/EM-i
CALM2	UC/EM-i
CALM3	UC/EM-i
CAMP	UC-t
CARM1	UC/EM-i
CASP1	EM-t
CASP3	NA
CASP8	EM-t
CASR	NA
CAT	UC/EM-i
CAV1	UC/EM-i
CAV3	UC/EM-i
CBFA2T3	UC/EM-i
CBFB	NA
CBL	EM-t
CBR1	UC/EM-i
CCDC59	MM-t
CCKBR	EM-t
CCL11	EM-t
CCL2	MM-t
CCL5	EM-t
CCNC	NA
CCND1	EM-t
CCND3	EM-t
CCNH	UC-t
CCNT1	UC-t
CCNT2	UC-t
CCS	EM-t
CD28	EM-t
CD2	MM-t
CD3D	EM-t
CD3E	EM-t
CD3G	EM-t
CD40LG	EM-t
CD44	UC/EM-i
CD4	EM-t
CD55	EM-t
CD80	EM-t
CD86	EM-t
CD8A	EM-t
CDC16	EM-t
CDC23	EM-t
CDC25C	EM-t
CDC26	EM-t
CDC42	NA
CDC5L	EM-t
CDH1	EM-t
CDH2	EM-t
CDK12	UC-t
CDK19	NA
CDK4	EM-t
CDK6	EM-t
CDK7	UC-t
CDK8	NA
CDK9	UC-t
CDKN1A	EM-t
CDKN1B	UC/EM-i
CDKN2A	UC/EM-i
CDKN2D	EM-t
CDX2	UC/EM-i
CEBPB	UC/EM-i
CEBPD	UC/EM-i
CEBPG	UC/EM-i
CEBPZ	UC-t
CES1	UC/EM-i
CES2	EM-t
CFD	EM-t
CFTR	UC/EM-i
CGA	EM-t
CGB8	EM-t
CHEK1	UC-t
CHEK2	NA
CHRNA3	EM-t
CHRNA5	EM-t
CHRNA7	UC/EM-i
CHRNB2	UC-t
CHUK	UC/EM-i
CIITA	EM-t
CITED2	EM-t
CLDN3	UC-t
CLDN4	UC-t
CLEC4E	EM-t
CLOCK	UC/EM-i
CLPTM1L	EM-t
CLU	EM-t
CMA1	UC/EM-i
CMTM2	EM-t
CNR1	UC-t
CNR2	EM-t
CNTF	UC/EM-i
COL18A1	EM-t
COMMD1	EM-t
COMT	UC/EM-i
COPS5	EM-t
CP	UC-t
CRABP2	EM-t
CREB1	UC/EM-i
CREB3L1	EM-t
CREB3L3	EM-t
CREBBP	UC/EM-i
CREM	NA
CRH	EM-t
CRHR2	EM-t
CRP	EM-t
CRTC1	EM-t
CRTC2	EM-t
CRTC3	EM-t
CRX	EM-t
CRY1	EM-t
CRY2	EM-t
CSE1L	UC/EM-i
CSF1	EM-t
CSF2	EM-t
CSF3	NA
CSK	UC/EM-i
CTBP1	EM-t
CTCF	UC-t
CTDP1	UC-t
CTDSP1	EM-t
CTGF	EM-t
CTNNB1	EM-t
CTNND1	EM-t
CUX1	UC/EM-i
CXCL12	EM-t
CXCL1	EM-t
CXCR3	EM-t
CXCR4	EM-t
CYBA	NA
CYBB	UC-t
CYLD	EM-t
CYP1A1	UC/EM-i
CYP1A2	EM-t
CYP1B1	EM-t
CYP26A1	EM-t
CYP27B1	UC/EM-i
CYP2A13	UC-t
CYP2C9	EM-t
CYP2D6	EM-t
CYP2E1	NA
CYP3A4	NA
CYP4Z1	EM-t
CYR61	EM-t
CYSLTR1	EM-t
DAXX	EM-t
DBP	UC/EM-i
DCD	UC-t
DDAH1	EM-t
DDB2	UC-t
DDIT3	UC/EM-i
DDIT4	EM-t
DDX17	MM-t
DDX54	NA
DEFA1B	UC-t
DEFA1	UC-t
DEK	EM-t
DHCR24	UC-t
DHFR	EM-t
DICER1	EM-t
DKK1	EM-t
DLC1	UC-t
DNAJB1	EM-t
DNMT1	UC-t
DNMT3A	UC-t
DNMT3B	EM-t
DPP3	UC-t
DRD2	UC-t
DUSP1	UC-t
DUSP6	UC-t
DVL3	UC-t
E2F2	UC/EM-i
E2F3	UC/EM-i
E2F4	UC-t
E2F5	UC-t
E2F6	UC-t
E2F7	EM-t
E2F8	EM-t
E4F1	UC/EM-i
EBF1	EM-t
EBF2	UC/EM-i
EBI3	NA
EDN1	EM-t
EDNRA	UC/EM-i
EDNRB	UC-t
EGF	EM-t
EGFR	NA
EGLN1	UC/EM-i
EGR1	UC/EM-i
EGR2	UC/EM-i
EGR3	UC/EM-i
EGR4	UC/EM-i
EHMT1	EM-t
EHMT2	EM-t
EIF2A	EM-t
EIF2AK3	UC/EM-i
EIF2S1	EM-t
ELANE	EM-t
ELAVL1	UC/EM-i
ELF1	UC/EM-i
ELF2	UC/EM-i
ELL	UC-t
EN1	EM-t
ENO1	UC-t
ENTPD1	EM-t
EOMES	EM-t
EP300	NA
EP400	EM-t
EPAS1	UC/EM-i
EPO	EM-t
EPOR	EM-t
ERBB2	UC-t
ERBB4	NA
ERCC2	UC-t
ERCC3	UC-t
ERCC4	UC-t
ERCC6	UC-t
EREG	UC-t
ERF	EM-t
ERN1	EM-t
ESR1	UC/EM-i
ESR2	UC/EM-i
ESRRA	UC/EM-i
ESRRB	MM-t
ESRRG	NA
ETFA	EM-t
ETS1	UC/EM-i
ETS2	UC/EM-i
ETV4	UC/EM-i
ETV5	EM-t
ETV7	UC/EM-i
EZH2	UC/EM-i
EZR	UC/EM-i
F2	EM-t
F2RL1	EM-t
F3	EM-t
F5	MM-t
F7	EM-t
FABP4	UC-t
FADD	UC/EM-i
FAM120B	NA
FANCD2	UC-t
FANCI	UC-t
FASLG	EM-t
FASN	NA
FBXO6	UC/EM-i
FBXW7	UC-t
FCER2	EM-t
FGB	EM-t
FGF10	UC/EM-i
FGF19	EM-t
FGF2	EM-t
FGF7	NA
FGF8	EM-t
FGF9	EM-t
FGFR1	EM-t
FGFR2	EM-t
FHL2	UC/EM-i
FKBP4	EM-t
FLT1	UC/EM-i
FLT3	UC-t
FLT3LG	EM-t
FN1	EM-t
FOS	NA
FOSB	UC/EM-i
FOSL1	EM-t
FOSL2	EM-t
FOXA1	UC/EM-i
FOXA3	NA
FOXC1	EM-t
FOXD3	EM-t
FOXF1	EM-t
FOXF2	UC/EM-i
FOXG1	EM-t
FOXH1	UC/EM-i
FOXI1	UC/EM-i
FOXJ1	UC/EM-i
FOXJ2	UC/EM-i
FOXL1	UC/EM-i
FOXL2	UC-t
FOXM1	UC/EM-i
FOXN1	UC/EM-i
FOXO1	UC/EM-i
FOXO3	UC/EM-i
FOXP1	MM-t
FOXP3	EM-t
FOXQ1	UC/EM-i
FSCN1	EM-t
FSHB	EM-t
FST	EM-t
FTL	EM-t
FXN	UC-t
FYN	EM-t
FZR1	EM-t
G3BP1	EM-t
GAB1	EM-t
GAB2	EM-t
GABPA	UC/EM-i
GABPB1	UC/EM-i
GABPB2	UC/EM-i
GADD45A	EM-t
GAST	EM-t
GATA1	UC/EM-i
GATA2	UC/EM-i
GATA3	EM-t
GATA4	EM-t
GATA6	EM-t
GBA	UC/EM-i
GCM1	UC/EM-i
GDNF	EM-t
GEMIN4	NA
GFI1	EM-t
GHRL	UC/EM-i
GJB1	UC-t
GLI1	EM-t
GLI2	EM-t
GLI3	EM-t
GLO1	NA
GLRX	MM-t
GNAI1	UC-t
GNAI2	UC-t
GNAI3	UC-t
GNAO1	UC-t
GNAQ	UC-t
GNAS	EM-t
GNAZ	UC-t
GNMT	UC-t
GPR39	UC-t
GPX1	EM-t
GPX4	UC/EM-i
GRB2	EM-t
GREM1	EM-t
GSK3A	MM-t
GSK3B	UC/EM-i
GSN	EM-t
GSTA1	EM-t
GSTM1	EM-t
GSTO1	EM-t
GSTP1	EM-t
GSTT1	EM-t
GTF2A2	UC/EM-i
GTF2F1	UC-t
GTF2F2	UC-t
GTF2H1	UC-t
GTF2H2	UC-t
GTF2H3	UC-t
GTF2H4	UC-t
GTF3A	UC/EM-i
GUSB	UC/EM-i
H2AFB1	EM-t
H2AFX	EM-t
H2AFZ	EM-t
H3F3A	EM-t
H3F3B	EM-t
HAMP	UC-t
HAND1	UC/EM-i
HBA1	EM-t
HBA2	EM-t
HBEGF	UC/EM-i
HBP1	EM-t
HCAR2	UC/EM-i
HCFC1	UC/EM-i
HDAC1	EM-t
HDAC2	NA
HDAC3	EM-t
HDAC4	UC/EM-i
HDAC5	UC-t
HDAC6	NA
HDAC7	UC/EM-i
HDAC8	EM-t
HES1	EM-t
HES6	EM-t
HEY1	EM-t
HEY2	EM-t
HEYL	EM-t
HGF	UC/EM-i
HHIP	UC/EM-i
HIF1A	UC/EM-i
HIF3A	EM-t
HIP1	EM-t
HIPK1	EM-t
HIPK2	EM-t
HIST1H2AB	EM-t
HIST1H2AC	EM-t
HIST1H2AD	EM-t
HIST1H2AE	EM-t
HIST1H2AJ	EM-t
HIST1H2BA	EM-t
HIST1H2BB	EM-t
HIST1H2BC	EM-t
HIST1H2BD	EM-t
HIST1H2BE	EM-t
HIST1H2BF	EM-t
HIST1H2BG	EM-t
HIST1H2BH	EM-t
HIST1H2BI	EM-t
HIST1H2BJ	EM-t
HIST1H2BK	EM-t
HIST1H2BL	EM-t
HIST1H2BM	EM-t
HIST1H2BN	EM-t
HIST1H2BO	EM-t
HIST1H3A	EM-t
HIST1H3B	EM-t
HIST1H3D	EM-t
HIST1H3E	EM-t
HIST1H3H	EM-t
HIST1H3I	EM-t
HIST1H3J	EM-t
HIST1H4A	EM-t
HIST1H4B	EM-t
HIST1H4C	EM-t
HIST1H4D	EM-t
HIST1H4E	EM-t
HIST1H4F	EM-t
HIST1H4H	EM-t
HIST1H4I	EM-t
HIST1H4J	EM-t
HIST1H4K	EM-t
HIST1H4L	EM-t
HIST2H2AA3	EM-t
HIST2H2AA4	EM-t
HIST2H2BE	EM-t
HIST2H3A	EM-t
HIST2H3C	EM-t
HIST2H3D	EM-t
HIST2H4A	EM-t
HIST2H4B	EM-t
HIST3H2BB	EM-t
HIST4H4	EM-t
HLA-A	EM-t
HLA-DRA	EM-t
HLA-DRB1	EM-t
HLF	UC/EM-i
HMGA1	UC/EM-i
HMGA2	EM-t
HMGCR	EM-t
HMOX1	UC/EM-i
HNF1A	UC/EM-i
HNF1B	EM-t
HNRNPA1	EM-t
HNRNPD	EM-t
HOMER3	EM-t
HOXA3	EM-t
HOXA4	UC/EM-i
HOXA5	EM-t
HOXA9	UC/EM-i
HOXB13	EM-t
HOXC4	EM-t
HPX	EM-t
HR	UC/EM-i
HRH1	UC/EM-i
HRH2	EM-t
HRH4	EM-t
HSD11B1	UC/EM-i
HSD11B2	EM-t
HSF2	UC/EM-i
HSPA1A	EM-t
HSPA1B	EM-t
HSPA5	EM-t
HSPA9	MM-t
HTR2A	EM-t
IAPP	UC/EM-i
ICAM1	EM-t
IDH3A	UC-t
IFNA10	EM-t
IFNA13	NA
IFNA14	EM-t
IFNA16	EM-t
IFNA17	EM-t
IFNA1	NA
IFNA21	EM-t
IFNA2	NA
IFNA4	EM-t
IFNA6	EM-t
IFNA7	EM-t
IFNA8	EM-t
IFNAR1	EM-t
IFNAR2	UC/EM-i
IFNB1	UC/EM-i
IFNG	NA
IGF1	UC/EM-i
IGF1R	UC/EM-i
IGF2BP1	EM-t
IGFBP5	UC-t
IHH	UC/EM-i
IKBKB	EM-t
IL10	UC/EM-i
IL11	EM-t
IL12A	EM-t
IL12B	EM-t
IL12RB2	EM-t
IL13	NA
IL15	UC-t
IL17A	EM-t
IL18	NA
IL18R1	NA
IL18RAP	NA
IL1A	NA
IL1B	UC/EM-i
IL1RN	EM-t
IL23A	EM-t
IL23R	EM-t
IL24	EM-t
IL27	NA
IL27RA	NA
IL2	NA
IL2RA	EM-t
IL3	NA
IL4	NA
IL4R	EM-t
IL5	EM-t
IL6	EM-t
IL6R	EM-t
IL6ST	NA
ILK	UC/EM-i
ING4	EM-t
INHBA	EM-t
INSR	EM-t
IRF1	UC/EM-i
IRF2	NA
IRF3	NA
IRF4	NA
IRF7	UC/EM-i
IRF8	UC/EM-i
ISL1	EM-t
ITGA4	EM-t
ITGAL	EM-t
ITGAV	UC/EM-i
ITGB1	UC-t
ITGB2	EM-t
ITPKA	UC-t
JAG1	NA
JAK1	EM-t
JAK2	EM-t
JDP2	UC/EM-i
JMY	EM-t
JUN	UC/EM-i
JUNB	NA
JUND	NA
KAT2A	EM-t
KAT2B	UC/EM-i
KAT5	UC/EM-i
KAT7	EM-t
KCNMA1	EM-t
KCNMB1	EM-t
KDM1A	UC/EM-i
KDM3A	NA
KDM4B	EM-t
KDM4C	NA
KDM5B	UC/EM-i
KDR	EM-t
KEAP1	UC/EM-i
KHSRP	UC/EM-i
KIT	EM-t
KL	EM-t
KLF12	UC/EM-i
KLF2	UC/EM-i
KLF5	EM-t
KLF8	EM-t
KLK2	EM-t
KLK3	MM-t
KMT2B	EM-t
KMT2C	UC/EM-i
KMT2D	UC/EM-i
KMT2E	EM-t
KNG1	UC-t
KRAS	UC/EM-i
KRT18	UC-t
KRT8	UC-t
LAT	UC-t
LATS2	EM-t
LCK	UC/EM-i
LCN2	EM-t
LDB1	UC-t
LDHA	EM-t
LDLR	EM-t
LEF1	UC/EM-i
LEP	EM-t
LEPR	EM-t
LGALS1	EM-t
LHX3	UC/EM-i
LIF	EM-t
LIN37	UC-t
LMNA	UC-t
LMO1	UC-t
LMO2	UC/EM-i
LPA	EM-t
LPIN1	EM-t
LPL	NA
LRIG1	EM-t
LRRK2	UC/EM-i
LTA	EM-t
LY96	EM-t
MACROD1	UC-t
MAF	UC/EM-i
MAFA	EM-t
MAFG	UC/EM-i
MAK	EM-t
MAML1	EM-t
MAMLD1	EM-t
MAP2K1	UC/EM-i
MAP2K2	UC-t
MAP2K3	EM-t
MAP2K4	UC/EM-i
MAP2K5	UC/EM-i
MAP2K6	NA
MAP3K1	NA
MAP3K5	UC/EM-i
MAP4K4	EM-t
MAPK11	UC/EM-i
MAPK12	UC/EM-i
MAPK14	UC/EM-i
MAPK1	UC/EM-i
MAPK3	UC/EM-i
MAPK7	UC/EM-i
MAPK8	EM-t
MAPK9	NA
MAPKAPK2	EM-t
MAPKAPK3	EM-t
MAT2B	UC/EM-i
MAX	UC/EM-i
MAZ	UC/EM-i
MDC1	UC-t
MDM2	EM-t
MDM4	UC/EM-i
MECOM	UC/EM-i
MED10	NA
MED11	NA
MED12	EM-t
MED13	NA
MED13L	NA
MED14	NA
MED15	NA
MED16	NA
MED17	NA
MED19	NA
MED1	UC/EM-i
MED20	NA
MED21	NA
MED22	NA
MED23	NA
MED24	NA
MED26	NA
MED27	NA
MED28	NA
MED29	NA
MED30	NA
MED31	NA
MED4	NA
MED6	NA
MED7	NA
MED8	NA
MED9	NA
MEF2C	UC/EM-i
MEF2D	EM-t
MEIS1	UC/EM-i
MET	EM-t
MFGE8	UC/EM-i
MGAT5	UC/EM-i
MGMT	UC-t
MIF	UC/EM-i
MITF	EM-t
MKL1	UC/EM-i
MLH1	UC-t
MLST8	UC/EM-i
MLX	UC-t
MLXIPL	UC-t
MME	EM-t
MMP14	UC-t
MMP9	EM-t
MNAT1	UC-t
MOV10	NA
MPG	MM-t
MPO	NA
MSH3	EM-t
MSMO1	UC-t
MSX1	UC/EM-i
MT1A	EM-t
MT2A	UC/EM-i
MTA1	EM-t
MTF1	UC/EM-i
MTNR1B	EM-t
MTOR	UC/EM-i
MXD1	UC-t
MYB	UC/EM-i
MYBL2	UC-t
MYC	UC/EM-i
MYCBP	UC-t
MYCN	UC/EM-i
MYD88	NA
MYOCD	UC/EM-i
MYOD1	UC/EM-i
MYOG	UC/EM-i
NANOG	EM-t
NCF1	UC-t
NCOA1	UC/EM-i
NCOA2	UC/EM-i
NCOA3	UC/EM-i
NCOA4	UC/EM-i
NCOA6	UC/EM-i
NCOA7	MM-t
NCOR1	UC/EM-i
NCOR2	UC-t
NDFIP1	UC/EM-i
NDRG1	NA
NDRG2	EM-t
NELFA	UC-t
NELFB	UC-t
NELFCD	UC-t
NELFE	UC-t
NEUROD1	UC-t
NEUROG3	EM-t
NF1	UC/EM-i
NFAT5	EM-t
NFATC1	NA
NFATC2	NA
NFATC3	NA
NFATC4	UC-t
NFE2	UC/EM-i
NFE2L1	UC/EM-i
NFE2L2	UC/EM-i
NFIB	NA
NFKB1	EM-t
NFKBIA	EM-t
NFKBIB	EM-t
NFYA	UC-t
NFYB	UC-t
NGF	UC/EM-i
NGFR	EM-t
NHLH1	UC/EM-i
NKX2-1	UC/EM-i
NKX2-5	UC/EM-i
NLRC5	UC-t
NLRP3	EM-t
NMNAT1	EM-t
NOC2L	EM-t
NOD2	UC/EM-i
NOG	UC/EM-i
NOS3	EM-t
NOTCH1	EM-t
NOTCH2	EM-t
NOX4	EM-t
NOXO1	UC-t
NPAS2	UC/EM-i
NPC1	UC-t
NPM1	UC/EM-i
NQO1	NA
NQO2	UC/EM-i
NR0B1	UC-t
NR0B2	UC/EM-i
NR1D1	EM-t
NR1H2	EM-t
NR1H4	UC/EM-i
NR1I2	UC/EM-i
NR1I3	UC/EM-i
NR2C1	EM-t
NR2C2	EM-t
NR2F1	UC/EM-i
NR3C1	UC/EM-i
NR3C2	UC/EM-i
NR4A1	EM-t
NR4A2	EM-t
NR4A3	EM-t
NR5A1	EM-t
NR5A2	EM-t
NR6A1	UC/EM-i
NRAS	UC/EM-i
NRF1	UC/EM-i
NRG1	UC/EM-i
NRIP1	EM-t
NTF3	EM-t
NTRK2	EM-t
NUDT1	UC-t
NUPR1	EM-t
ODC1	EM-t
OGG1	UC-t
OGT	EM-t
ONECUT1	EM-t
OR5I1	UC/EM-i
ORMDL3	EM-t
OSM	EM-t
P2RX4	UC-t
P2RX7	UC-t
P2RY11	EM-t
P2RY6	UC-t
PARG	UC-t
PARP14	EM-t
PARP1	NA
PATZ1	EM-t
PAWR	EM-t
PAX2	UC/EM-i
PAX3	UC/EM-i
PAX4	UC/EM-i
PAX5	UC/EM-i
PAX6	UC/EM-i
PAX8	UC/EM-i
PBX1	UC/EM-i
PCBP1	UC/EM-i
PCNA	MM-t
PDCD4	EM-t
PDE4A	UC/EM-i
PDGFA	UC/EM-i
PDGFB	UC/EM-i
PDK4	EM-t
PDX1	EM-t
PELP1	EM-t
PER1	EM-t
PER2	EM-t
PEX19	MM-t
PGR	UC/EM-i
PHB2	EM-t
PHB	EM-t
PIAS1	EM-t
PIAS3	EM-t
PIAS4	EM-t
PIK3CA	UC/EM-i
PIK3R1	EM-t
PIN1	EM-t
PINK1	UC/EM-i
PITX2	UC/EM-i
PKN1	NA
PKN3	EM-t
PLAUR	EM-t
PLCG1	EM-t
PLD1	UC/EM-i
PLD2	NA
PLK1	EM-t
PLK3	EM-t
PLXND1	EM-t
PMAIP1	EM-t
PML	EM-t
PNCK	UC-t
POLH	UC-t
POLR2A	UC/EM-i
POLR2B	UC/EM-i
POLR2C	UC/EM-i
POLR2D	UC/EM-i
POLR2E	UC/EM-i
POLR2G	UC/EM-i
POLR2H	UC/EM-i
POLR2I	UC/EM-i
POLR2J	UC/EM-i
POLR2K	UC/EM-i
POLR2L	UC/EM-i
POMC	EM-t
PON1	UC/EM-i
POR	UC-t
POSTN	EM-t
POU1F1	UC/EM-i
POU2F1	UC/EM-i
POU3F1	UC/EM-i
POU3F2	UC/EM-i
POU4F1	EM-t
POU4F2	EM-t
POU5F1	EM-t
POU6F1	EM-t
PPARA	UC/EM-i
PPARD	UC/EM-i
PPARG	UC/EM-i
PPARGC1A	UC/EM-i
PPARGC1B	UC-t
PPIA	EM-t
PPP1R13B	UC/EM-i
PPP1R15A	UC-t
PPP2CA	UC/EM-i
PPP2R1A	EM-t
PPP2R2A	UC-t
PPP2R5C	UC-t
PPP2R5E	UC-t
PPRC1	UC/EM-i
PRAM1	EM-t
PRDM1	EM-t
PRDX1	EM-t
PRDX2	EM-t
PRDX4	UC/EM-i
PRKAA1	EM-t
PRKAA2	UC/EM-i
PRKACA	UC/EM-i
PRKACB	UC/EM-i
PRKCA	NA
PRKCB	NA
PRKCD	NA
PRKCE	NA
PRKCG	NA
PRKCH	NA
PRKCQ	EM-t
PRKCZ	NA
PRKDC	EM-t
PRKG1	UC-t
PRLR	MM-t
PRMT5	EM-t
PRMT6	EM-t
PRODH	UC-t
PROX1	EM-t
PRRX2	EM-t
PSEN1	EM-t
PSEN2	UC/EM-i
PTCH1	EM-t
PTEN	UC/EM-i
PTF1A	UC/EM-i
PTGDR	UC/EM-i
PTGDS	UC-t
PTGER1	EM-t
PTGER2	EM-t
PTGES2	EM-t
PTGES	EM-t
PTGR1	EM-t
PTGS1	UC/EM-i
PTGS2	UC/EM-i
PTH	UC/EM-i
PTHLH	NA
PTK2B	EM-t
PTMA	EM-t
PTPN1	MM-t
PTPN2	UC-t
PUM2	EM-t
RAC1	NA
RAD23B	UC/EM-i
RAD51	UC/EM-i
RAD51D	UC-t
RAF1	UC/EM-i
RAG1	EM-t
RAG2	EM-t
RALA	EM-t
RANBP9	EM-t
RAP2A	EM-t
RARB	EM-t
RARG	EM-t
RASSF1	EM-t
RASSF5	EM-t
RB1	UC/EM-i
RB1CC1	EM-t
RBBP4	UC-t
RBBP5	EM-t
RBBP7	UC-t
RBBP8	UC/EM-i
RBL1	UC-t
RBL2	UC-t
RBM4	EM-t
RBP2	UC-t
RBPJ	EM-t
RCOR1	UC/EM-i
RECK	EM-t
RELA	NA
REL	UC/EM-i
RELB	UC/EM-i
REPIN1	UC/EM-i
REST	EM-t
RFX1	UC/EM-i
RHEB	EM-t
RHOA	UC/EM-i
RHOB	EM-t
RNASEL	NA
RNF128	MM-t
RNF187	EM-t
RNF34	UC/EM-i
RORA	UC/EM-i
RORC	EM-t
RPL11	UC-t
RPS6KA3	EM-t
RPS6KB1	EM-t
RPTOR	UC/EM-i
RREB1	UC/EM-i
RUNX1	UC/EM-i
RUNX2	UC/EM-i
RUNX3	EM-t
RUVBL1	UC/EM-i
RUVBL2	UC/EM-i
RXRA	UC/EM-i
RXRB	UC/EM-i
RXRG	EM-t
RYBP	UC-t
RYR1	EM-t
S100A11	UC-t
S100A4	EM-t
S100B	NA
S1PR3	UC-t
SALL4	EM-t
SAP18	UC-t
SAP30	UC-t
SCAI	EM-t
SDC2	EM-t
SEMA4A	EM-t
SENP1	EM-t
SERPINB5	EM-t
SESN2	EM-t
SETD1A	EM-t
SETD1B	EM-t
SETD7	EM-t
SF1	UC/EM-i
SFRP2	NA
SFTPA2	EM-t
SGK1	UC/EM-i
SGK2	UC/EM-i
SHBG	EM-t
SHC1	EM-t
SHH	EM-t
SIK1	EM-t
SIN3A	UC/EM-i
SIN3B	UC/EM-i
SIRT1	EM-t
SIRT3	NA
SIRT4	EM-t
SIRT5	EM-t
SIRT7	UC/EM-i
SKI	UC-t
SLC20A1	UC-t
SLC22A2	EM-t
SLC31A1	EM-t
SLC38A2	EM-t
SLC39A2	UC-t
SLC39A6	EM-t
SLC39A8	EM-t
SLC3A2	EM-t
SLC46A1	EM-t
SLC6A3	EM-t
SLURP1	EM-t
SMAD1	UC/EM-i
SMAD2	NA
SMAD3	UC/EM-i
SMAD4	UC/EM-i
SMAD7	EM-t
SMAD9	NA
SMARCA2	EM-t
SMARCA4	UC/EM-i
SMARCB1	EM-t
SMARCC1	UC/EM-i
SMARCC2	UC-t
SMARCD1	UC-t
SMARCD3	UC/EM-i
SMARCE1	EM-t
SMO	EM-t
SMPD1	EM-t
SNAI1	EM-t
SNCA	NA
SND1	EM-t
SNW1	EM-t
SOD1	UC/EM-i
SOD2	NA
SOS1	EM-t
SOX2	EM-t
SOX30	EM-t
SOX9	UC/EM-i
SP1	UC/EM-i
SP3	UC/EM-i
SP4	EM-t
SPARC	MM-t
SPDEF	EM-t
SPDL1	UC-t
SPEN	EM-t
SPHK1	EM-t
SPHK2	EM-t
SPI1	UC/EM-i
SPP1	EM-t
SPZ1	UC/EM-i
SQSTM1	EM-t
SRC	NA
SRD5A1	UC-t
SREBF1	UC/EM-i
SREBF2	UC-t
SRF	UC/EM-i
SRSF2	EM-t
SRSF3	UC-t
SRY	EM-t
SSRP1	UC-t
SSTR2	EM-t
SSTR5	EM-t
STAM2	UC-t
STAM	UC-t
STAT1	UC/EM-i
STAT2	UC/EM-i
STAT3	EM-t
STAT4	UC/EM-i
STAT5A	UC/EM-i
STAT5B	UC/EM-i
STAT6	UC/EM-i
STK11	UC/EM-i
STK17A	EM-t
SULT2A1	UC-t
SUMO1	EM-t
SUPT16H	UC-t
SUPT3H	UC/EM-i
SUPT4H1	UC-t
SUPT5H	UC-t
SUPT7L	UC/EM-i
SVIL	EM-t
TAB2	NA
TAC1	EM-t
TADA2B	EM-t
TAF10	UC/EM-i
TAF12	UC/EM-i
TAL1	UC-t
TBK1	EM-t
TBL1X	UC/EM-i
TBL1XR1	UC/EM-i
TBP	NA
TBX21	UC/EM-i
TBX5	EM-t
TCF12	UC/EM-i
TCF3	UC/EM-i
TCF4	EM-t
TCF7	EM-t
TCF7L1	UC/EM-i
TCF7L2	EM-t
TDP1	UC-t
TEAD1	EM-t
TEAD2	EM-t
TEAD4	EM-t
TEK	EM-t
TERT	UC/EM-i
TES	UC/EM-i
TFAM	UC-t
TFAP2A	UC/EM-i
TFAP2B	EM-t
TFAP2C	UC/EM-i
TFAP4	UC/EM-i
TFCP2	UC/EM-i
TFDP1	UC/EM-i
TFDP2	UC/EM-i
TFEB	UC/EM-i
TGFA	NA
TGFB1	EM-t
TGFB1I1	UC/EM-i
TGFB2	UC/EM-i
TGFB3	UC/EM-i
TGFBI	NA
TGIF1	UC/EM-i
TGIF2	EM-t
TGS1	UC/EM-i
THPO	EM-t
THRAP3	NA
THRA	UC-t
THRB	UC-t
TIMP2	UC-t
TIPARP	UC/EM-i
TLE1	EM-t
TLR2	UC/EM-i
TLR3	MM-t
TLR4	EM-t
TLR9	UC-t
TLX2	UC/EM-i
TMF1	EM-t
TNF	UC/EM-i
TNFAIP3	EM-t
TNFAIP6	EM-t
TNFRSF10A	NA
TNFRSF10B	NA
TNFRSF10C	NA
TNFRSF10D	NA
TNFRSF1A	UC-t
TNFSF11	EM-t
TNIK	UC/EM-i
TNRC6A	NA
TNRC6B	NA
TNRC6C	NA
TOP2B	EM-t
TOPBP1	MM-t
TP53	UC/EM-i
TP53BP2	UC/EM-i
TP63	UC/EM-i
TP73	UC/EM-i
TRAF4	UC/EM-i
TRAP1	UC/EM-i
TRH	EM-t
TRIB3	EM-t
TRIM24	EM-t
TRIM28	UC/EM-i
TRIM33	UC/EM-i
TRIM59	EM-t
TRIM7	MM-t
TRIP6	EM-t
TRPM7	UC-t
TRPV1	EM-t
TRPV4	EM-t
TRPV6	EM-t
TRRAP	UC/EM-i
TSC22D3	EM-t
TSHB	EM-t
TSLP	EM-t
TTF1	MM-t
TWIST1	EM-t
TXLNG	EM-t
TXN	NA
TXNIP	EM-t
TYK2	EM-t
TYMP	NA
TYMS	EM-t
TYR	UC-t
UBA3	EM-t
UBE2C	EM-t
UBE2D1	EM-t
UBE2E1	EM-t
UBE3A	UC/EM-i
UBP1	UC/EM-i
UCN	EM-t
UCP1	MM-t
UGT1A3	EM-t
USF2	EM-t
UXT	NA
VAV3	EM-t
VDR	UC/EM-i
VEGFA	EM-t
VEGFC	UC/EM-i
VHL	UC/EM-i
VIP	UC/EM-i
VSX1	UC/EM-i
WDR5	EM-t
WNT3A	UC/EM-i
WNT5A	UC-t
WNT7A	EM-t
WRN	UC/EM-i
WT1	UC-t
WWTR1	EM-t
XBP1	UC/EM-i
XPA	EM-t
XRCC5	EM-t
XRCC6	EM-t
YAP1	UC/EM-i
YBX1	EM-t
YY1	UC/EM-i
ZAP70	UC-t
ZBTB14	UC/EM-i
ZBTB17	EM-t
ZBTB18	EM-t
ZBTB33	EM-t
ZEB1	UC/EM-i
ZFHX3	EM-t
ZFPM1	UC/EM-i
ZHX2	EM-t
ZIC1	UC/EM-i
ZIC2	UC/EM-i
ZIC3	UC/EM-i
ZMIZ2	EM-t
ZMYND8	UC/EM-i
ZNF318	EM-t
ZNF366	UC-t
ZNF385A	NA
ZNF423	NA
ZNF461	EM-t
ZNF467	EM-t
ZNFX1	UC-t
