# Supplementary material for: Somatic mutations in early metazoan genes disrupt regulatory links between unicellular and multicellular genes in cancer
Source: eLife journal article supplement (doi:10.7554/elife.40947), 2019-02-25
Supplement: supp [file elife-40947-supp-v1.zip › elife_poa_e40947_Supplementary_File_4.txt]

query.number	significant	p.value	term.size	query.size	overlap.size	precision	recall	term.id	domain	subgraph.number	term.name	relative.depth	intersection
840	1	TRUE	8.35e-06	24	194	11	0.057	0.458	CORUM:103	cor	181	RNA polymerase II holoenzyme complex	1	POLR2J,POLR2B,POLR2E,POLR2C,POLR2I,POLR2D,POLR2K,POLR2H,POLR2G,POLR2L,POLR2A
841	1	TRUE	4.72e-12	13	194	12	0.062	0.923	CORUM:2686	cor	317	BRCA1-core RNA polymerase II complex	1	POLR2J,BRCA1,POLR2B,POLR2E,POLR2C,POLR2I,POLR2D,POLR2K,POLR2H,POLR2G,POLR2L,POLR2A
842	1	TRUE	0.0499	3	194	3	0.015	1	CORUM:2970	cor	410	mTOR complex (MTOR, RAPTOR, MLST8)	1	RPTOR,MLST8,MTOR
843	1	TRUE	0.0499	3	194	3	0.015	1	CORUM:2760	cor	32	SMAD3-SMAD4-FOXO3 complex	1	FOXO3,SMAD4,SMAD3
844	1	TRUE	0.0499	3	194	3	0.015	1	CORUM:2990	cor	325	mTOR complex (MTOR, RAPTOR, MLST8)	1	RPTOR,MLST8,MTOR
845	1	TRUE	0.0404	6	194	4	0.021	0.667	CORUM:1166	cor	360	p400-associated complex	1	ACTL6A,RUVBL1,RUVBL2,TRRAP
846	1	TRUE	0.0499	3	194	3	0.015	1	CORUM:2124	cor	151	IKK-alpha--ER-alpha-AIB1 complex	1	ESR1,NCOA3,CHUK
847	1	TRUE	0.000175	5	194	5	0.026	1	CORUM:1170	cor	249	c-MYC-ATPase-helicase complex	1	ACTL6A,MYC,RUVBL1,RUVBL2,TRRAP
848	1	TRUE	0.000175	5	194	5	0.026	1	CORUM:1171	cor	270	c-MYC-ATPase-helicase complex	1	ACTL6A,MYC,RUVBL1,RUVBL2,TRRAP
849	1	TRUE	0.0499	3	194	3	0.015	1	CORUM:2641	cor	316	CREBBP-KAT2B-MYOD1 complex	1	CREBBP,KAT2B,MYOD1
850	1	TRUE	0.00844	8	194	5	0.026	0.625	CORUM:787	cor	300	NuA4/Tip60-HAT complex B	1	ACTL6A,KAT5,RUVBL1,RUVBL2,TRRAP
851	1	TRUE	0.0499	3	194	3	0.015	1	CORUM:3980	cor	178	mTOR complex (MTOR, RAPTOR, MLST8)	1	RPTOR,MLST8,MTOR
852	1	TRUE	0.0499	3	194	3	0.015	1	CORUM:1297	cor	177	MKK4-ARRB2-ASK1 complex	1	MAP2K4,ARRB2,MAP3K5
853	1	TRUE	0.0499	3	194	3	0.015	1	CORUM:3754	cor	139	CREBBP-SMAD3-SMAD4 pentameric complex	1	CREBBP,SMAD4,SMAD3
854	1	TRUE	6.03e-08	17	194	11	0.057	0.647	CORUM:2685	cor	376	RNA polymerase II (RNAPII)	1	POLR2J,POLR2B,POLR2E,POLR2C,POLR2I,POLR2D,POLR2K,POLR2H,POLR2G,POLR2L,POLR2A
855	1	TRUE	7.64e-11	12	194	11	0.057	0.917	CORUM:104	cor	349	RNA polymerase II core complex	1	POLR2J,POLR2B,POLR2E,POLR2C,POLR2I,POLR2D,POLR2K,POLR2H,POLR2G,POLR2L,POLR2A
856	1	TRUE	0.0499	3	194	3	0.015	1	CORUM:6203	cor	354	TFAP2C-Myc-KDM5B complex	1	TFAP2C,KDM5B,MYC
857	1	TRUE	0.0499	3	194	3	0.015	1	CORUM:1897	cor	175	mTOR complex (MTOR, RAPTOR, MLST8)	1	RPTOR,MLST8,MTOR
858	1	TRUE	0.0499	3	194	3	0.015	1	CORUM:2706	cor	319	SMAD3-SMAD4-SP1 complex	1	SMAD4,SMAD3,SP1
859	1	TRUE	0.0499	3	194	3	0.015	1	CORUM:1173	cor	209	TIP49-TIP48-BAF53 complex	1	ACTL6A,RUVBL1,RUVBL2
860	1	TRUE	0.000175	5	194	5	0.026	1	CORUM:525	cor	51	TIP60 histone acetylase complex	1	ACTL6A,KAT5,RUVBL1,RUVBL2,TRRAP
861	1	TRUE	6.19e-05	10	194	7	0.036	0.7	CORUM:2829	cor	238	RSmad complex	1	CREBBP,NCOA3,SMARCA4,SMAD4,SMAD3,SMARCC1,TRIM33
862	1	TRUE	0.0499	3	194	3	0.015	1	CORUM:2761	cor	195	SMAD3-SMAD4-FOXO1 complex	1	SMAD4,FOXO1,SMAD3
863	1	TRUE	0.0344	10	194	5	0.026	0.5	CORUM:471	cor	199	PCAF complex	1	KAT2B,TAF12,TAF10,SUPT3H,TRRAP
864	1	TRUE	0.0499	3	194	3	0.015	1	CORUM:2708	cor	244	SMAD3-SMAD4-cJUN complex	1	SMAD4,SMAD3,JUN
865	1	TRUE	0.0344	10	194	5	0.026	0.5	CORUM:477	cor	90	PCAF complex	1	KAT2B,TAF12,TAF10,SUPT3H,TRRAP
866	1	TRUE	1.74e-06	26	194	12	0.062	0.462	CORUM:2825	cor	197	BRCA1-RNA polymerase II complex	1	POLR2J,BRCA1,POLR2B,POLR2E,POLR2C,POLR2I,POLR2D,POLR2K,POLR2H,POLR2G,POLR2L,POLR2A
1106	1	TRUE	2e-04	90	286	15	0.052	0.167	KEGG:04658	keg	379	Th1 and Th2 cell differentiation	1	TBX21,MAPK1,MAPK3,MAPK14,STAT1,STAT5A,STAT4,STAT6,STAT5B,JUN,MAF,LCK,MAPK11,MAPK12,CHUK
1107	1	TRUE	0.000661	137	286	18	0.063	0.131	KEGG:04210	keg	156	Apoptosis	1	MAPK1,MAPK3,PIK3CA,ATF4,RAF1,KRAS,NGF,TP53,FADD,MAP2K1,BCL2L1,EIF2AK3,DDIT3,JUN,MAP3K5,NRAS,CHUK,TNF
1108	1	TRUE	4.56e-08	125	286	23	0.08	0.184	KEGG:04380	keg	365	Osteoclast differentiation	1	SPI1,TGFB2,MAPK1,MAPK3,RELB,MAPK14,STAT1,FHL2,CREB1,PIK3CA,IL1B,FOSB,PPARG,IFNAR2,MAP2K1,STAT2,IFNB1,JUN,LCK,MAPK11,MAPK12,CHUK,TNF
1109	1	TRUE	4.09e-07	58	286	15	0.052	0.259	KEGG:05213	keg	387	Endometrial cancer	1	GSK3B,MAPK1,MAPK3,FOXO3,PIK3CA,RAF1,KRAS,MYC,LEF1,TP53,TCF7L1,ILK,MAP2K1,PTEN,NRAS
1110	1	TRUE	0.00665	162	286	18	0.063	0.111	KEGG:04630	keg	333	JAK-STAT signaling pathway	1	CREBBP,PDGFB,STAT1,PIK3CA,STAT5A,RAF1,IL10,MYC,STAT4,IFNAR2,STAT6,STAT2,BCL2L1,IFNB1,STAT5B,PDGFA,MTOR,CNTF
1111	1	TRUE	0.00283	152	286	18	0.063	0.118	KEGG:04921	keg	426	Oxytocin signaling pathway	1	RHOA,PRKACA,PTGS2,MEF2C,MAPK1,MAPK3,RAF1,KRAS,MAP2K5,PRKACB,CALM2,CALM3,PRKAA2,MAPK7,MAP2K1,JUN,CALM1,NRAS
1112	1	TRUE	1.94e-07	233	286	31	0.108	0.133	KEGG:04014	keg	361	Ras signaling pathway	1	IGF1,HGF,RHOA,FGF10,PRKACA,PLD1,ABL1,MAPK1,PDGFB,FLT1,MAPK3,PIK3CA,RAF1,KRAS,NGF,ETS1,IGF1R,PRKACB,CALM2,VEGFC,ETS2,CALM3,REL,MAP2K1,BCL2L1,BDNF,NF1,PDGFA,CALM1,NRAS,CHUK
1113	1	TRUE	0.00587	146	286	17	0.059	0.116	KEGG:04310	keg	339	Wnt signaling pathway	1	CREBBP,RHOA,PRKACA,GSK3B,TBL1X,PPARD,MYC,LEF1,TP53,SMAD4,PRKACB,TCF7L1,WNT3A,SMAD3,RUVBL1,TBL1XR1,JUN
1114	1	TRUE	0.000854	66	286	12	0.042	0.182	KEGG:05230	keg	194	Central carbon metabolism in cancer	1	MAPK1,HIF1A,MAPK3,PIK3CA,RAF1,KRAS,MYC,TP53,MAP2K1,PTEN,MTOR,NRAS
1115	1	TRUE	1.72e-06	83	286	17	0.059	0.205	KEGG:04350	keg	415	TGF-beta signaling pathway	1	CREBBP,RHOA,TGFB2,MAPK1,MAPK3,PPP2CA,TGFB3,MYC,SMAD4,PITX2,SMAD3,SMAD1,TGIF1,NOG,SP1,TFDP1,TNF
1116	1	TRUE	2.29e-09	99	286	22	0.077	0.222	KEGG:04933	keg	155	AGE-RAGE signaling pathway in diabetic complications	1	TGFB2,MAPK1,MAPK3,CDKN1B,MAPK14,STAT1,TGFB3,EGR1,PIK3CA,IL1B,STAT5A,KRAS,SMAD4,VEGFC,FOXO1,SMAD3,STAT5B,JUN,MAPK11,MAPK12,NRAS,TNF
1117	1	TRUE	0.000337	118	286	17	0.059	0.144	KEGG:04071	keg	396	Sphingolipid signaling pathway	1	RHOA,PLD1,MAPK1,MAPK3,MAPK14,PPP2CA,PIK3CA,RAF1,KRAS,TP53,MAP2K1,PTEN,MAPK11,MAPK12,MAP3K5,NRAS,TNF
1118	1	TRUE	0.0031	99	286	14	0.049	0.141	KEGG:05231	keg	287	Choline metabolism in cancer	1	PLD1,MAPK1,PDGFB,HIF1A,MAPK3,PIK3CA,RAF1,KRAS,MAP2K1,JUN,SP1,PDGFA,MTOR,NRAS
1119	1	TRUE	3.46e-11	137	286	28	0.098	0.204	KEGG:05418	keg	189	Fluid shear stress and atherosclerosis	1	MAP2K4,RHOA,KEAP1,MEF2C,HMOX1,PDGFB,CAV1,MAPK14,NFE2L2,PIK3CA,IL1B,KLF2,MAP2K5,ITGAV,TP53,CALM2,CALM3,PRKAA2,MAPK7,JUN,CAV3,MAPK11,MAPK12,MAP3K5,PDGFA,CALM1,CHUK,TNF
1120	1	TRUE	4.56e-09	37	286	14	0.049	0.378	KEGG:05216	keg	114	Thyroid cancer	1	MAPK1,MAPK3,PAX8,PPARG,KRAS,MYC,LEF1,TP53,TCF7L1,MAP2K1,RXRA,RXRB,NRAS,NCOA4
1121	1	TRUE	2.57e-10	148	286	28	0.098	0.189	KEGG:05226	keg	302	Gastric cancer	1	E2F2,HGF,FGF10,GSK3B,TGFB2,MAPK1,MAPK3,CDKN1B,E2F3,TGFB3,PIK3CA,RAF1,KRAS,MYC,LEF1,RB1,TP53,SMAD4,TCF7L1,WNT3A,TERT,CDX2,SMAD3,MAP2K1,RXRA,MTOR,RXRB,NRAS
1122	1	TRUE	0.00508	35	286	8	0.028	0.229	KEGG:05020	keg	393	Prion diseases	1	PRKACA,MAPK1,MAPK3,EGR1,IL1B,SOD1,PRKACB,MAP2K1
1123	1	TRUE	1.36e-18	253	286	48	0.168	0.19	KEGG:05166	keg	230	Human T-cell leukemia virus 1 infection	1	CREBBP,E2F2,MAP2K4,SPI1,TCF3,PRKACA,GSK3B,TGFB2,XBP1,PDGFB,RELB,E2F3,SRF,KAT2B,ATF2,CREB1,MYB,TGFB3,EGR1,PIK3CA,EGR2,ATF1,STAT5A,ATF4,KRAS,ETS1,MYC,RB1,TP53,SMAD4,PRKACB,CDKN2A,WNT3A,ETS2,ATF3,MSX1,TERT,SMAD3,BCL2L1,KAT5,STAT5B,JUN,LCK,TRRAP,PDGFA,NRAS,CHUK,TNF
1124	1	TRUE	8.71e-08	200	286	29	0.101	0.145	KEGG:05203	keg	252	Viral carcinogenesis	1	CREBBP,HDAC7,RHOA,HDAC4,PRKACA,MAPK1,MAPK3,CDKN1B,SRF,UBE3A,KAT2B,ATF2,CREB1,PIK3CA,EGR2,STAT5A,ATF4,KRAS,RB1,GTF2A2,TP53,PRKACB,CDKN2A,REL,STAT5B,JUN,EGR3,IRF7,NRAS
1125	1	TRUE	0.027	229	286	21	0.073	0.092	KEGG:04714	keg	348	Thermogenesis	1	KDM1A,PRKACA,SMARCD3,PPARGC1A,MAPK14,ATF2,CREB1,SMARCA4,PPARG,KRAS,ACTL6A,RPTOR,PRKACB,PRKAA2,MLST8,SMARCC1,MAPK11,MAPK12,MAP3K5,MTOR,NRAS
1126	1	TRUE	2.01e-09	353	286	43	0.15	0.122	KEGG:04151	keg	193	PI3K-Akt signaling pathway	1	BRCA1,IGF1,HGF,FGF10,GSK3B,MAPK1,PDGFB,SGK2,FLT1,MAPK3,CDKN1B,PPP2CA,ATF2,STK11,CREB1,MYB,SGK1,FOXO3,PIK3CA,ATF4,RAF1,KRAS,NGF,MYC,TLR2,ITGAV,IGF1R,TP53,RPTOR,VEGFC,IFNAR2,PRKAA2,MLST8,MAP2K1,BCL2L1,IFNB1,PTEN,BDNF,RXRA,PDGFA,MTOR,NRAS,CHUK
1127	1	TRUE	1.29e-06	31	286	11	0.038	0.355	KEGG:03020	keg	406	RNA polymerase	1	POLR2J,POLR2B,POLR2E,POLR2C,POLR2I,POLR2D,POLR2K,POLR2H,POLR2G,POLR2L,POLR2A
1128	1	TRUE	2.38e-08	91	286	20	0.07	0.22	KEGG:04211	keg	102	Longevity regulating pathway	1	IGF1,PRKACA,PPARGC1A,ATF2,STK11,CREB1,FOXO3,CAT,PIK3CA,ATF4,PPARG,KRAS,IGF1R,TP53,RPTOR,PRKACB,FOXO1,PRKAA2,MTOR,NRAS
1129	1	TRUE	2.05e-05	76	286	15	0.052	0.197	KEGG:05133	keg	355	Pertussis	1	RHOA,MAPK1,MAPK3,MAPK14,IRF1,IL1B,IL10,IRF8,CALM2,CALM3,JUN,MAPK11,MAPK12,CALM1,TNF
1130	1	TRUE	1.36e-11	104	286	25	0.087	0.24	KEGG:04625	keg	399	C-type lectin receptor signaling pathway	1	RHOA,PTGS2,MAPK1,MAPK3,RELB,MAPK14,STAT1,PIK3CA,EGR2,IRF1,IL1B,RAF1,KRAS,IL10,CALM2,CALM3,STAT2,JUN,EGR3,MAPK11,MAPK12,CALM1,NRAS,CHUK,TNF
1131	1	TRUE	4.61e-08	136	286	24	0.084	0.176	KEGG:04915	keg	161	Estrogen signaling pathway	1	PRKACA,PGR,NCOA1,ESR1,MAPK1,MAPK3,HBEGF,ATF2,CREB1,PIK3CA,NCOA3,ATF4,RAF1,KRAS,ESR2,NCOA2,PRKACB,CALM2,CALM3,MAP2K1,JUN,SP1,CALM1,NRAS
1132	1	TRUE	7.35e-08	139	286	24	0.084	0.173	KEGG:04550	keg	308	Signaling pathways regulating pluripotency of stem cells	1	PAX6,IGF1,TCF3,GSK3B,MAPK1,MAPK3,MAPK14,HAND1,PIK3CA,RAF1,KRAS,HNF1A,MYC,IGF1R,SMAD4,MEIS1,WNT3A,ZIC3,SMAD3,MAP2K1,SMAD1,MAPK11,MAPK12,NRAS
1133	1	TRUE	4.8e-09	93	286	21	0.073	0.226	KEGG:04912	keg	343	GnRH signaling pathway	1	MAP2K4,PRKACA,PLD1,MAPK1,MAPK3,MAPK14,HBEGF,EGR1,ATF4,RAF1,KRAS,PRKACB,CALM2,CALM3,MAPK7,MAP2K1,JUN,MAPK11,MAPK12,CALM1,NRAS
1134	1	TRUE	1.36e-05	64	286	14	0.049	0.219	KEGG:04213	keg	147	Longevity regulating pathway - multiple species	1	IGF1,PRKACA,FOXO3,CAT,PIK3CA,KRAS,IGF1R,RPTOR,SOD1,PRKACB,FOXO1,PRKAA2,MTOR,NRAS
1135	1	TRUE	1.2e-07	131	286	23	0.08	0.176	KEGG:05160	keg	106	Hepatitis C	1	GSK3B,MAPK1,MAPK3,MAPK14,PPP2CA,STAT1,PIK3CA,IRF1,RAF1,KRAS,TP53,IFNAR2,STAT2,IFNB1,EIF2AK3,MAPK11,IRF7,RXRA,PPARA,MAPK12,NRAS,CHUK,TNF
1136	1	TRUE	1.34e-05	339	286	35	0.122	0.103	KEGG:05165	keg	394	Human papillomavirus infection	1	CREBBP,HDAC7,HDAC4,PRKACA,PTGS2,GSK3B,MAPK1,MAPK3,CDKN1B,PPP2CA,UBE3A,STAT1,CREB1,PIK3CA,IRF1,RAF1,KRAS,ITGAV,RB1,TP53,PRKACB,FOXO1,TCF7L1,WNT3A,IFNAR2,TERT,FADD,MAP2K1,STAT2,IFNB1,PTEN,MTOR,NRAS,CHUK,TNF
1137	1	TRUE	0.000166	67	286	13	0.045	0.194	KEGG:04720	keg	207	Long-term potentiation	1	CREBBP,PRKACA,MAPK1,MAPK3,ATF4,RAF1,KRAS,PRKACB,CALM2,CALM3,MAP2K1,CALM1,NRAS
1138	1	TRUE	3.91e-08	66	286	17	0.059	0.258	KEGG:05221	keg	296	Acute myeloid leukemia	1	SPI1,MAPK1,MAPK3,PPARD,PIK3CA,STAT5A,RAF1,KRAS,MYC,LEF1,TCF7L1,RUNX1,MAP2K1,STAT5B,MTOR,NRAS,CHUK
1139	1	TRUE	3.91e-08	66	286	17	0.059	0.258	KEGG:05223	keg	266	Non-small cell lung cancer	1	E2F2,MAPK1,MAPK3,E2F3,FOXO3,PIK3CA,STAT5A,RAF1,KRAS,RB1,TP53,CDKN2A,MAP2K1,STAT5B,RXRA,RXRB,NRAS
1140	1	TRUE	0.0365	124	286	14	0.049	0.113	KEGG:04114	keg	397	Oocyte meiosis	1	IGF1,PRKACA,PGR,MAPK1,MAPK3,PPP2CA,IGF1R,PRKACB,CALM2,CALM3,MAP2K1,AR,MAPK12,CALM1
1141	1	TRUE	0.0307	68	286	10	0.035	0.147	KEGG:05031	keg	411	Amphetamine addiction	1	PRKACA,ATF2,CREB1,FOSB,ATF4,PRKACB,CALM2,CALM3,JUN,CALM1
1142	1	TRUE	1.08e-09	105	286	23	0.08	0.219	KEGG:04659	keg	309	Th17 cell differentiation	1	RORA,TBX21,MAPK1,HIF1A,MAPK3,AHR,MAPK14,STAT1,IL1B,STAT5A,SMAD4,RUNX1,STAT6,SMAD3,STAT5B,JUN,LCK,MAPK11,RXRA,MAPK12,MTOR,RXRB,CHUK
1143	1	TRUE	3e-09	110	286	23	0.08	0.209	KEGG:04668	keg	369	TNF signaling pathway	1	MAP2K4,PTGS2,MAPK1,MAPK3,MAPK14,ATF2,CREB1,PIK3CA,IRF1,IL1B,ATF4,VEGFC,NOD2,FADD,MAP2K1,IFNB1,CEBPB,JUN,MAPK11,MAPK12,MAP3K5,CHUK,TNF
1144	1	TRUE	0.0412	111	286	13	0.045	0.117	KEGG:05145	keg	267	Toxoplasmosis	1	TGFB2,MAPK1,MAPK3,MAPK14,STAT1,TGFB3,IL10,TLR2,BCL2L1,MAPK11,MAPK12,CHUK,TNF
1145	1	TRUE	0.0195	103	286	13	0.045	0.126	KEGG:04922	keg	356	Glucagon signaling pathway	1	CREBBP,PRKACA,PPARGC1A,ATF2,CREB1,ATF4,PRKACB,CALM2,FOXO1,CALM3,PRKAA2,PPARA,CALM1
1146	1	TRUE	0.002	121	286	16	0.056	0.132	KEGG:04152	keg	392	AMPK signaling pathway	1	CFTR,IGF1,ELAVL1,SREBF1,PPARGC1A,PPP2CA,STK11,CREB1,FOXO3,PIK3CA,PPARG,IGF1R,RPTOR,FOXO1,PRKAA2,MTOR
1147	1	TRUE	1.56e-11	71	286	21	0.073	0.296	KEGG:05214	keg	297	Glioma	1	E2F2,IGF1,MAPK1,PDGFB,MAPK3,E2F3,PIK3CA,RAF1,KRAS,RB1,IGF1R,TP53,CALM2,CDKN2A,CALM3,MAP2K1,PTEN,PDGFA,CALM1,MTOR,NRAS
1148	1	TRUE	5.8e-05	93	286	16	0.056	0.172	KEGG:05222	keg	345	Small cell lung cancer	1	E2F2,PTGS2,TRAF4,CDKN1B,E2F3,PIK3CA,MAX,MYC,ITGAV,RB1,TP53,BCL2L1,PTEN,RXRA,RXRB,CHUK
1149	1	TRUE	0.0028	211	286	22	0.077	0.104	KEGG:05170	keg	111	Human immunodeficiency virus 1 infection	1	MAPK1,MAPK3,AP1S1,MAPK14,PIK3CA,RAF1,KRAS,TLR2,CALM2,CALM3,FADD,MAP2K1,BCL2L1,IFNB1,JUN,MAPK11,MAPK12,CALM1,MTOR,NRAS,CHUK,TNF
1150	1	TRUE	1.23e-10	199	286	33	0.115	0.166	KEGG:05205	keg	12	Proteoglycans in cancer	1	IGF1,HGF,CD44,RHOA,PRKACA,TFAP4,ESR1,EZR,TGFB2,MAPK1,HIF1A,MAPK3,CAV1,MAPK14,HBEGF,PIK3CA,RAF1,KRAS,MYC,TLR2,ITGAV,IGF1R,TP53,PRKACB,WNT3A,IHH,MAP2K1,CAV3,MAPK11,MAPK12,MTOR,NRAS,TNF
1151	1	TRUE	0.0031	99	286	14	0.049	0.141	KEGG:04914	keg	403	Progesterone-mediated oocyte maturation	1	IGF1,PRKACA,PGR,MAPK1,MAPK3,MAPK14,PIK3CA,RAF1,KRAS,IGF1R,PRKACB,MAP2K1,MAPK11,MAPK12
1152	1	TRUE	3.91e-15	76	286	25	0.087	0.329	KEGG:05220	keg	73	Chronic myeloid leukemia	1	E2F2,MECOM,TGFB2,ABL1,MAPK1,MAPK3,CDKN1B,E2F3,TGFB3,PIK3CA,STAT5A,RAF1,KRAS,MYC,RB1,TP53,SMAD4,CDKN2A,RUNX1,SMAD3,MAP2K1,BCL2L1,STAT5B,NRAS,CHUK
1153	1	TRUE	0.0149	51	286	9	0.031	0.176	KEGG:05014	keg	305	Amyotrophic lateral sclerosis (ALS)	1	MAPK14,CAT,TP53,SOD1,BCL2L1,MAPK11,MAPK12,MAP3K5,TNF
1154	1	TRUE	1.21e-08	70	286	18	0.063	0.257	KEGG:04917	keg	137	Prolactin signaling pathway	1	GSK3B,ESR1,MAPK1,MAPK3,MAPK14,STAT1,FOXO3,PIK3CA,IRF1,STAT5A,RAF1,KRAS,ESR2,MAP2K1,STAT5B,MAPK11,MAPK12,NRAS
1155	1	TRUE	1.4e-06	63	286	15	0.052	0.238	KEGG:05321	keg	103	Inflammatory bowel disease (IBD)	1	RORA,TBX21,TGFB2,STAT1,TGFB3,IL1B,IL10,TLR2,STAT4,STAT6,SMAD3,NOD2,JUN,MAF,TNF
1156	1	TRUE	0.0164	88	286	12	0.042	0.136	KEGG:04540	keg	373	Gap junction	1	PRKACA,MAPK1,PDGFB,MAPK3,RAF1,KRAS,MAP2K5,PRKACB,MAPK7,MAP2K1,PDGFA,NRAS
1157	1	TRUE	9.53e-14	167	286	34	0.119	0.204	KEGG:05225	keg	336	Hepatocellular carcinoma	1	E2F2,HGF,KEAP1,SMARCD3,GSK3B,TGFB2,MAPK1,HMOX1,MAPK3,E2F3,NFE2L2,TGFB3,PIK3CA,SMARCA4,RAF1,KRAS,ACTL6A,MYC,LEF1,RB1,IGF1R,TP53,SMAD4,CDKN2A,TCF7L1,WNT3A,TERT,SMAD3,MAP2K1,BCL2L1,PTEN,SMARCC1,MTOR,NRAS
1158	1	TRUE	4.03e-07	175	286	26	0.091	0.149	KEGG:05152	keg	255	Tuberculosis	1	CREBBP,RHOA,TGFB2,MAPK1,MAPK3,CYP27B1,VDR,MAPK14,STAT1,CREB1,TGFB3,IL1B,RAF1,IL10,TLR2,CALM2,CEBPG,CALM3,NOD2,FADD,IFNB1,CEBPB,MAPK11,MAPK12,CALM1,TNF
1159	1	TRUE	2.83e-12	186	286	34	0.119	0.183	KEGG:05167	keg	242	Kaposi sarcoma-associated herpesvirus infection	1	CREBBP,E2F2,MAP2K4,PTGS2,GSK3B,MAPK1,PDGFB,HIF1A,MAPK3,MAPK14,E2F3,STAT1,CREB1,PIK3CA,RAF1,KRAS,MYC,RB1,TP53,CALM2,IFNAR2,CALM3,FADD,MAP2K1,STAT2,IFNB1,JUN,MAPK11,IRF7,MAPK12,CALM1,MTOR,NRAS,CHUK
1160	1	TRUE	2.91e-07	41	286	13	0.045	0.317	KEGG:05219	keg	258	Bladder cancer	1	E2F2,MAPK1,MAPK3,E2F3,HBEGF,RAF1,KRAS,MYC,RB1,TP53,CDKN2A,MAP2K1,NRAS
1161	1	TRUE	0.000589	206	286	23	0.08	0.112	KEGG:04015	keg	318	Rap1 signaling pathway	1	IGF1,HGF,RHOA,FGF10,MAPK1,PDGFB,FLT1,MAPK3,MAPK14,PIK3CA,RAF1,KRAS,NGF,IGF1R,CALM2,VEGFC,CALM3,MAP2K1,MAPK11,MAPK12,PDGFA,CALM1,NRAS
1162	1	TRUE	4.43e-05	70	286	14	0.049	0.2	KEGG:05140	keg	185	Leishmaniasis	1	PTGS2,TGFB2,MAPK1,MAPK3,MAPK14,STAT1,TGFB3,IL1B,IL10,TLR2,JUN,MAPK11,MAPK12,TNF
1163	1	TRUE	2.27e-14	150	286	33	0.115	0.22	KEGG:05206	keg	168	MicroRNAs in cancer	1	CREBBP,E2F2,BRCA1,CD44,RHOA,HDAC4,TP63,PTGS2,EZR,TGFB2,ABL1,MAPK1,HMOX1,PDGFB,EZH2,CDKN1B,E2F3,PIK3CA,RAF1,KRAS,MYC,TP53,RPTOR,CDKN2A,ZEB1,WNT3A,MAPK7,MAP2K1,PTEN,PDGFA,MDM4,MTOR,NRAS
1164	1	TRUE	8.84e-18	95	286	30	0.105	0.316	KEGG:01522	keg	378	Endocrine resistance	1	E2F2,IGF1,PRKACA,ESR1,MAPK1,MAPK3,CDKN1B,MAPK14,E2F3,HBEGF,PIK3CA,NCOA3,MED1,RAF1,KRAS,RB1,ESR2,IGF1R,NCOR1,TP53,CARM1,PRKACB,CDKN2A,MAP2K1,JUN,MAPK11,SP1,MAPK12,MTOR,NRAS
1165	1	TRUE	9.18e-11	197	286	33	0.115	0.168	KEGG:05169	keg	70	Epstein-Barr virus infection	1	POLR2J,CREBBP,CD44,POLR2B,MAP2K4,SPI1,HDAC4,PRKACA,GSK3B,POLR2E,POLR2C,RELB,POLR2I,CDKN1B,MAPK14,ATF2,PIK3CA,IL10,MYC,RB1,TP53,PRKACB,POLR2D,POLR2K,POLR2H,POLR2G,EIF2AK3,JUN,POLR2L,POLR2A,MAPK11,MAPK12,CHUK
1166	1	TRUE	1.56e-06	137	286	22	0.077	0.161	KEGG:04371	keg	294	Apelin signaling pathway	1	HDAC4,PRKACA,MEF2C,MAPK1,MAPK3,NRF1,ACTA2,PPARGC1A,EGR1,KLF2,RAF1,KRAS,SMAD4,PRKACB,CALM2,CALM3,PRKAA2,SMAD3,MAP2K1,CALM1,MTOR,NRAS
1167	1	TRUE	1.94e-05	157	286	22	0.077	0.14	KEGG:04934	keg	260	Cushing syndrome	1	E2F2,PRKACA,GSK3B,MAPK1,MAPK3,AHR,CDKN1B,E2F3,ATF2,CREB1,ATF4,LEF1,RB1,PRKACB,ARNT,CDKN2A,TCF7L1,WNT3A,KMT2D,MAP2K1,SP1,PBX1
1168	1	TRUE	2.62e-06	129	286	21	0.073	0.163	KEGG:04140	keg	417	Autophagy - animal	1	PRKACA,MAPK1,HIF1A,MAPK3,PPP2CA,STK11,PIK3CA,RAF1,KRAS,IGF1R,RPTOR,PRKACB,PRKAA2,MLST8,MAP2K1,BCL2L1,PTEN,EIF2AK3,ATG7,MTOR,NRAS
1169	1	TRUE	1.66e-16	185	286	39	0.136	0.211	KEGG:05202	keg	234	Transcriptional misregulation in cancer	1	ETV7,IGF1,SPI1,TCF3,HOXA9,MEF2C,FLT1,CDKN1B,ATF1,RUNX2,PAX8,MAX,PPARG,MYCN,LMO2,PAX3,MYC,IGF1R,NCOR1,TP53,MEIS1,ZEB1,FOXO1,RUNX1,REL,SIN3A,SMAD1,BCL2L1,CEBPB,DDIT3,ETV4,MAF,SP1,PBX1,RXRA,PAX5,SUPT3H,PDGFA,RXRB
1170	1	TRUE	0.00159	59	286	11	0.038	0.186	KEGG:04370	keg	276	VEGF signaling pathway	1	PTGS2,MAPK1,MAPK3,MAPK14,PIK3CA,RAF1,KRAS,MAP2K1,MAPK11,MAPK12,NRAS
1171	1	TRUE	1.29e-08	79	286	19	0.066	0.241	KEGG:01521	keg	120	EGFR tyrosine kinase inhibitor resistance	1	IGF1,HGF,GSK3B,MAPK1,PDGFB,MAPK3,FOXO3,PIK3CA,RAF1,KRAS,IGF1R,NRG1,MAP2K1,BCL2L1,PTEN,NF1,PDGFA,MTOR,NRAS
1172	1	TRUE	4.36e-12	296	286	43	0.15	0.145	KEGG:04010	keg	315	MAPK signaling pathway	1	IGF1,HGF,MAP2K4,FGF10,PRKACA,MEF2C,MECOM,TGFB2,MAPK1,PDGFB,FLT1,MAPK3,RELB,MAPK14,SRF,ATF2,TGFB3,IL1B,MAX,ATF4,RAF1,KRAS,NGF,MYC,MAP2K5,IGF1R,ARRB2,TP53,PRKACB,VEGFC,MAPK7,MAP2K1,DDIT3,BDNF,JUN,MAPK11,MAPK12,NF1,MAP3K5,PDGFA,NRAS,CHUK,TNF
1173	1	TRUE	1.02e-19	144	286	38	0.133	0.264	KEGG:05161	keg	36	Hepatitis B	1	CREBBP,E2F2,MAP2K4,TGFB2,MAPK1,MAPK3,CDKN1B,E2F3,STAT1,ATF2,CREB1,TGFB3,PIK3CA,EGR2,STAT5A,ATF4,RAF1,KRAS,MYC,TLR2,STAT4,RB1,TP53,SMAD4,STAT6,SMAD3,FADD,MAP2K1,STAT2,IFNB1,PTEN,STAT5B,JUN,EGR3,IRF7,NRAS,CHUK,TNF
1174	1	TRUE	6.18e-08	86	286	19	0.066	0.221	KEGG:05210	keg	127	Colorectal cancer	1	RHOA,GSK3B,TGFB2,MAPK1,MAPK3,TGFB3,PIK3CA,RAF1,KRAS,MYC,LEF1,TP53,SMAD4,TCF7L1,SMAD3,MAP2K1,JUN,MTOR,NRAS
1175	1	TRUE	2.2e-09	72	286	19	0.066	0.264	KEGG:05218	keg	253	Melanoma	1	E2F2,IGF1,HGF,FGF10,MAPK1,PDGFB,MAPK3,E2F3,PIK3CA,RAF1,KRAS,RB1,IGF1R,TP53,CDKN2A,MAP2K1,PTEN,PDGFA,NRAS
1176	1	TRUE	1.08e-06	101	286	19	0.066	0.188	KEGG:05142	keg	227	Chagas disease (American trypanosomiasis)	1	MAP2K4,TGFB2,MAPK1,MAPK3,MAPK14,PPP2CA,TGFB3,PIK3CA,IL1B,IL10,TLR2,SMAD3,FADD,IFNB1,JUN,MAPK11,MAPK12,CHUK,TNF
1177	1	TRUE	0.0391	70	286	10	0.035	0.143	KEGG:04662	keg	192	B cell receptor signaling pathway	1	GSK3B,MAPK1,MAPK3,PIK3CA,RAF1,KRAS,MAP2K1,JUN,NRAS,CHUK
1178	1	TRUE	3.33e-11	147	286	29	0.101	0.197	KEGG:05224	keg	311	Breast cancer	1	E2F2,BRCA1,IGF1,FGF10,PGR,GSK3B,NCOA1,ESR1,MAPK1,MAPK3,E2F3,PIK3CA,NCOA3,RAF1,KRAS,MYC,LEF1,RB1,ESR2,IGF1R,TP53,TCF7L1,WNT3A,MAP2K1,PTEN,JUN,SP1,MTOR,NRAS
1179	1	TRUE	0.0106	183	286	19	0.066	0.104	KEGG:05168	keg	48	Herpes simplex infection	1	CREBBP,STAT1,IL1B,ARNTL,CLOCK,TLR2,TP53,IFNAR2,TAF10,FADD,STAT2,IFNB1,EIF2AK3,HCFC1,JUN,POLR2A,IRF7,CHUK,TNF
1180	1	TRUE	2.43e-05	199	286	25	0.087	0.126	KEGG:04024	keg	150	cAMP signaling pathway	1	CFTR,CREBBP,PDE4A,RHOA,PRKACA,PLD1,MAPK1,MAPK3,CREB1,PIK3CA,SOX9,RAF1,PRKACB,CALM2,EDNRA,GHRL,CALM3,HHIP,MAP2K1,ADRB2,BDNF,JUN,HCAR2,PPARA,CALM1
1181	1	TRUE	1.29e-10	223	286	35	0.122	0.157	KEGG:05163	keg	8	Human cytomegalovirus infection	1	E2F2,RHOA,PRKACA,PTGS2,GSK3B,MAPK1,MAPK3,MAPK14,E2F3,ATF2,CREB1,PIK3CA,IL1B,ATF4,RAF1,KRAS,MYC,ITGAV,RB1,TP53,PRKACB,CALM2,CDKN2A,CALM3,FADD,MAP2K1,IFNB1,MAPK11,SP1,MAPK12,CALM1,MTOR,NRAS,CHUK,TNF
1182	1	TRUE	0.000734	194	286	22	0.077	0.113	KEGG:05016	keg	331	Huntington disease	1	POLR2J,CREBBP,POLR2B,RCOR1,POLR2E,POLR2C,POLR2I,NRF1,PPARGC1A,CREB1,PPARG,TP53,SOD1,POLR2D,POLR2K,POLR2H,POLR2G,SIN3A,BDNF,POLR2L,POLR2A,SP1
1183	1	TRUE	0.000179	138	286	19	0.066	0.138	KEGG:04910	keg	306	Insulin signaling pathway	1	PRKACA,SREBF1,GSK3B,MAPK1,MAPK3,PPARGC1A,PIK3CA,RAF1,KRAS,RPTOR,PRKACB,CALM2,FOXO1,CALM3,PRKAA2,MAP2K1,CALM1,MTOR,NRAS
1184	1	TRUE	3.02e-06	130	286	21	0.073	0.162	KEGG:04926	keg	27	Relaxin signaling pathway	1	MAP2K4,PRKACA,MAPK1,MAPK3,ACTA2,MAPK14,ATF2,CREB1,PIK3CA,ATF4,RAF1,KRAS,ARRB2,PRKACB,VEGFC,SMAD3,MAP2K1,JUN,MAPK11,MAPK12,NRAS
1185	1	TRUE	9.63e-10	69	286	19	0.066	0.275	KEGG:05211	keg	420	Renal cell carcinoma	1	CREBBP,HGF,TGFB2,MAPK1,PDGFB,HIF1A,MAPK3,EPAS1,TGFB3,PIK3CA,RAF1,KRAS,VHL,ETS1,EGLN1,ARNT,MAP2K1,JUN,NRAS
1186	1	TRUE	6.94e-11	76	286	21	0.073	0.276	KEGG:05212	keg	84	Pancreatic cancer	1	E2F2,RAD51,PLD1,TGFB2,MAPK1,MAPK3,E2F3,STAT1,TGFB3,PIK3CA,RAF1,KRAS,RB1,TP53,SMAD4,CDKN2A,SMAD3,MAP2K1,BCL2L1,MTOR,CHUK
1187	1	TRUE	3.84e-13	116	286	28	0.098	0.241	KEGG:04919	keg	303	Thyroid hormone signaling pathway	1	CREBBP,PRKACA,GSK3B,NCOA1,ESR1,MAPK1,HIF1A,MAPK3,KAT2B,STAT1,PIK3CA,NCOA3,MED1,RAF1,KRAS,MYC,ITGAV,NCOA2,NCOR1,TP53,PRKACB,FOXO1,MAP2K1,SIN3A,RXRA,MTOR,RXRB,NRAS
1188	1	TRUE	2.18e-10	107	286	24	0.084	0.224	KEGG:04928	keg	272	Parathyroid hormone synthesis, secretion and action	1	PDE4A,RHOA,PRKACA,PLD1,MEF2C,MAPK1,MAPK3,CYP27B1,VDR,HBEGF,ATF2,CREB1,EGR1,RUNX2,ATF4,RAF1,GCM1,ARRB2,PRKACB,PTH,MAP2K1,SP1,RXRA,RXRB
1189	1	TRUE	0.00273	124	286	16	0.056	0.129	KEGG:04110	keg	364	Cell cycle	1	CREBBP,E2F2,GSK3B,TGFB2,ABL1,CDKN1B,E2F3,TFDP2,TGFB3,MYC,RB1,TP53,SMAD4,CDKN2A,SMAD3,TFDP1
1190	1	TRUE	0.001	67	286	12	0.042	0.179	KEGG:04664	keg	243	Fc epsilon RI signaling pathway	1	MAP2K4,MAPK1,MAPK3,MAPK14,PIK3CA,RAF1,KRAS,MAP2K1,MAPK11,MAPK12,NRAS,TNF
1191	1	TRUE	0.00991	167	286	18	0.063	0.108	KEGG:04621	keg	340	NOD-like receptor signaling pathway	1	RHOA,MAPK1,MAPK3,MAPK14,STAT1,IL1B,IFNAR2,NOD2,FADD,STAT2,BCL2L1,IFNB1,JUN,MAPK11,IRF7,MAPK12,CHUK,TNF
1192	1	TRUE	3.77e-05	150	286	21	0.073	0.14	KEGG:04150	keg	223	mTOR signaling pathway	1	IGF1,RHOA,GSK3B,MAPK1,MAPK3,STK11,SGK1,PIK3CA,RAF1,KRAS,IGF1R,RPTOR,WNT3A,PRKAA2,MLST8,MAP2K1,PTEN,MTOR,NRAS,CHUK,TNF
1193	1	TRUE	0.000877	101	286	15	0.052	0.149	KEGG:04066	keg	427	HIF-1 signaling pathway	1	CREBBP,IGF1,MAPK1,HMOX1,HIF1A,FLT1,MAPK3,CDKN1B,PIK3CA,VHL,EGLN1,IGF1R,ARNT,MAP2K1,MTOR
1194	1	TRUE	0.013	99	286	13	0.045	0.131	KEGG:04750	keg	282	Inflammatory mediator regulation of TRP channels	1	IGF1,PRKACA,MAPK14,PIK3CA,IL1B,NGF,PRKACB,CALM2,CALM3,MAPK11,MAPK12,HRH1,CALM1
1195	1	TRUE	1.02e-05	93	286	17	0.059	0.183	KEGG:04657	keg	337	IL-17 signaling pathway	1	ELAVL1,PTGS2,TRAF4,GSK3B,MAPK1,MAPK3,MAPK14,IL1B,FOSB,MAPK7,FADD,CEBPB,JUN,MAPK11,MAPK12,CHUK,TNF
1196	1	TRUE	0.000115	65	286	13	0.045	0.2	KEGG:04137	keg	291	Mitophagy - animal	1	HIF1A,BNIP3L,TFEB,FOXO3,ATF4,KRAS,TP53,PINK1,BCL2L1,EIF2AK3,JUN,SP1,NRAS
1197	1	TRUE	0.000277	169	286	21	0.073	0.124	KEGG:05164	keg	38	Influenza A	1	CREBBP,MAP2K4,GSK3B,MAPK1,MAPK3,MAPK14,STAT1,ATF2,PIK3CA,IL1B,RAF1,IFNAR2,MAP2K1,STAT2,IFNB1,EIF2AK3,JUN,MAPK11,IRF7,MAPK12,TNF
1198	1	TRUE	0.00157	132	286	17	0.059	0.129	KEGG:04728	keg	371	Dopaminergic synapse	1	PRKACA,GSK3B,COMT,MAPK14,PPP2CA,ATF2,CREB1,ATF4,ARNTL,CLOCK,ARRB2,PRKACB,CALM2,CALM3,MAPK11,MAPK12,CALM1
1199	1	TRUE	0.0493	72	286	10	0.035	0.139	KEGG:01524	keg	225	Platinum drug resistance	1	BRCA1,MAPK1,MAPK3,PIK3CA,ATP7B,TP53,CDKN2A,FADD,BCL2L1,MAP3K5
1200	1	TRUE	3.67e-07	85	286	18	0.063	0.212	KEGG:04012	keg	382	ErbB signaling pathway	1	MAP2K4,GSK3B,ABL1,MAPK1,MAPK3,CDKN1B,HBEGF,PIK3CA,STAT5A,RAF1,KRAS,MYC,NRG1,MAP2K1,STAT5B,JUN,MTOR,NRAS
1201	1	TRUE	1.35e-09	158	286	28	0.098	0.177	KEGG:04218	keg	91	Cellular senescence	1	E2F2,TGFB2,MAPK1,MAPK3,FOXM1,MAPK14,E2F3,FOXO3,TGFB3,PIK3CA,RAF1,KRAS,ETS1,MYC,RB1,TP53,CALM2,CDKN2A,FOXO1,CALM3,SMAD3,MAP2K1,PTEN,MAPK11,MAPK12,CALM1,MTOR,NRAS
1202	1	TRUE	7.49e-06	102	286	18	0.063	0.176	KEGG:04620	keg	246	Toll-like receptor signaling pathway	1	MAP2K4,MAPK1,MAPK3,MAPK14,STAT1,PIK3CA,IL1B,TLR2,IFNAR2,FADD,MAP2K1,IFNB1,JUN,MAPK11,IRF7,MAPK12,CHUK,TNF
1203	1	TRUE	6.31e-12	119	286	27	0.094	0.227	KEGG:04722	keg	214	Neurotrophin signaling pathway	1	RHOA,TP73,GSK3B,ABL1,MAPK1,MAPK3,MAPK14,FOXO3,PIK3CA,ATF4,RAF1,KRAS,NGF,MAP2K5,TP53,PSEN2,CALM2,CALM3,MAPK7,MAP2K1,BDNF,JUN,MAPK11,MAPK12,MAP3K5,CALM1,NRAS
1204	1	TRUE	7.5e-29	526	286	84	0.294	0.16	KEGG:05200	keg	64	Pathways in cancer	1	CREBBP,E2F2,IGF1,HGF,RAD51,SPI1,RHOA,FGF10,PRKACA,PTGS2,PLD1,TRAF4,KEAP1,GSK3B,NCOA1,MECOM,ESR1,TGFB2,ABL1,MAPK1,HMOX1,PDGFB,HIF1A,MAPK3,CDKN1B,PPARD,E2F3,STAT1,EPAS1,NFE2L2,TGFB3,PIK3CA,NCOA3,PAX8,MAX,STAT5A,RAF1,PPARG,KRAS,VHL,ETS1,EGLN1,MYC,STAT4,ITGAV,LEF1,RB1,ESR2,IGF1R,TP53,SMAD4,PRKACB,ARNT,CALM2,CDKN2A,VEGFC,FOXO1,EDNRA,TCF7L1,WNT3A,IFNAR2,RUNX1,CALM3,HHIP,TERT,STAT6,SMAD3,FADD,MAP2K1,AR,…
1205	1	TRUE	2.14e-12	133	286	29	0.101	0.218	KEGG:04068	keg	263	FoxO signaling pathway	1	CREBBP,IGF1,TGFB2,MAPK1,SGK2,MAPK3,CDKN1B,MAPK14,STK11,SGK1,FOXO3,TGFB3,CAT,PIK3CA,KLF2,RAF1,KRAS,IL10,IGF1R,SMAD4,FOXO1,PRKAA2,SMAD3,MAP2K1,PTEN,MAPK11,MAPK12,NRAS,CHUK
1206	1	TRUE	3.54e-05	101	286	17	0.059	0.168	KEGG:04660	keg	236	T cell receptor signaling pathway	1	RHOA,GSK3B,MAPK1,MAPK3,MAPK14,PIK3CA,RAF1,KRAS,IL10,MAP2K1,JUN,LCK,MAPK11,MAPK12,NRAS,CHUK,TNF
1207	1	TRUE	2.31e-15	97	286	28	0.098	0.289	KEGG:05215	keg	312	Prostate cancer	1	CREBBP,E2F2,IGF1,GSK3B,MAPK1,PDGFB,MAPK3,CDKN1B,E2F3,CREB1,PIK3CA,ATF4,RAF1,KRAS,LEF1,RB1,IGF1R,TP53,ZEB1,FOXO1,TCF7L1,MAP2K1,AR,PTEN,PDGFA,MTOR,NRAS,CHUK
1208	1	TRUE	3.54e-05	101	286	17	0.059	0.168	KEGG:04916	keg	158	Melanogenesis	1	CREBBP,PRKACA,GSK3B,MAPK1,MAPK3,CREB1,RAF1,KRAS,LEF1,PRKACB,CALM2,TCF7L1,WNT3A,CALM3,MAP2K1,CALM1,NRAS
1209	1	TRUE	0.00542	131	286	16	0.056	0.122	KEGG:05162	keg	342	Measles	1	TP73,GSK3B,CDKN1B,STAT1,PIK3CA,IL1B,STAT5A,TLR2,TP53,IFNAR2,STAT2,IFNB1,EIF2AK3,STAT5B,IRF7,CHUK
1210	1	TRUE	0.0109	199	286	20	0.07	0.101	KEGG:04510	keg	45	Focal adhesion	1	IGF1,HGF,RHOA,GSK3B,MAPK1,PDGFB,FLT1,MAPK3,CAV1,PIK3CA,RAF1,ITGAV,IGF1R,VEGFC,ILK,MAP2K1,PTEN,JUN,CAV3,PDGFA
1246	1	TRUE	2.13e-10	287	326	36	0.11	0.125	REAC:R-HSA-9006925	rea	132	Intracellular signaling by second messengers	1	KDM1A,HGF,HDAC7,FGF10,PRKACA,GSK3B,MECOM,RCOR1,ESR1,MAPK1,PDGFB,MAPK3,EZH2,CDKN1B,HBEGF,PPP2CA,ATF2,CREB1,FOXO3,EGR1,PIK3CA,PPARG,ESR2,TP53,RPTOR,PRKACB,FOXO1,NRG1,MLST8,PTEN,JUN,LCK,PDGFA,CALM1,MTOR,CHUK
1247	1	TRUE	9.92e-10	256	326	33	0.101	0.129	REAC:R-HSA-1257604	rea	132	PIP3 activates AKT signaling	2	KDM1A,HGF,HDAC7,FGF10,GSK3B,MECOM,RCOR1,ESR1,MAPK1,PDGFB,MAPK3,EZH2,CDKN1B,HBEGF,PPP2CA,ATF2,CREB1,FOXO3,EGR1,PIK3CA,PPARG,ESR2,TP53,RPTOR,FOXO1,NRG1,MLST8,PTEN,JUN,LCK,PDGFA,MTOR,CHUK
1248	1	TRUE	0.00245	139	326	16	0.049	0.115	REAC:R-HSA-6807070	rea	132	PTEN Regulation	3	KDM1A,HDAC7,MECOM,RCOR1,MAPK1,MAPK3,EZH2,ATF2,EGR1,PPARG,TP53,RPTOR,MLST8,PTEN,JUN,MTOR
1249	1	TRUE	1.04e-07	60	326	15	0.046	0.25	REAC:R-HSA-8943724	rea	132	Regulation of PTEN gene transcription	4	KDM1A,HDAC7,MECOM,RCOR1,MAPK1,MAPK3,EZH2,ATF2,EGR1,PPARG,TP53,RPTOR,MLST8,JUN,MTOR
1250	1	TRUE	0.00134	103	326	14	0.043	0.136	REAC:R-HSA-199418	rea	132	Negative regulation of the PI3K/AKT network	3	HGF,FGF10,ESR1,MAPK1,PDGFB,MAPK3,HBEGF,PPP2CA,PIK3CA,ESR2,NRG1,PTEN,LCK,PDGFA
1251	1	TRUE	0.00315	96	326	13	0.04	0.135	REAC:R-HSA-6811558	rea	132	PI5P, PP2A and IER3 Regulate PI3K/AKT Signaling	4	HGF,FGF10,ESR1,MAPK1,PDGFB,MAPK3,HBEGF,PPP2CA,PIK3CA,ESR2,NRG1,LCK,PDGFA
1252	1	TRUE	5.73e-05	29	326	9	0.028	0.31	REAC:R-HSA-525793	rea	80	Myogenesis	1	TCF3,MEF2C,ABL1,MAPK14,MYOG,MYOD1,TCF12,MAPK11,MAPK12
1253	1	TRUE	5.73e-05	29	326	9	0.028	0.31	REAC:R-HSA-375170	rea	80	CDO in myogenesis	2	TCF3,MEF2C,ABL1,MAPK14,MYOG,MYOD1,TCF12,MAPK11,MAPK12
1254	1	TRUE	0.0232	33	326	7	0.021	0.212	REAC:R-HSA-186712	rea	374	Regulation of beta-cell development	1	PAX6,FGF10,PAX4,IAPP,HNF1A,FOXO1,PTF1A
1255	1	TRUE	1.54e-08	24	326	11	0.034	0.458	REAC:R-HSA-203927	rea	254	MicroRNA (miRNA) biogenesis	1	POLR2J,POLR2B,POLR2E,POLR2C,POLR2I,POLR2D,POLR2K,POLR2H,POLR2G,POLR2L,POLR2A
1256	1	TRUE	1.99e-05	74	326	14	0.043	0.189	REAC:R-HSA-6807505	rea	226	RNA polymerase II transcribes snRNA genes	1	POLR2J,POLR2B,POLR2E,POLR2C,POLR2I,GTF2A2,POU2F1,POLR2D,POLR2K,POLR2H,POLR2G,POLR2L,POLR2A,SP1
1257	1	TRUE	8.96e-05	83	326	14	0.043	0.169	REAC:R-HSA-674695	rea	171	RNA Polymerase II Pre-transcription Events	1	POLR2J,POLR2B,POLR2E,POLR2C,POLR2I,TAF12,GTF2A2,POLR2D,POLR2K,POLR2H,TAF10,POLR2G,POLR2L,POLR2A
1258	1	TRUE	4.89e-06	735	326	52	0.16	0.071	REAC:R-HSA-556833	rea	58	Metabolism of lipids	1	CREBBP,PON1,NR1H4,RORA,PRKACA,SREBF1,PTGS2,PLD1,SMARCD3,NCOA1,AKR1B1,PTGS1,TBL1X,CAV1,NRF1,AHR,PPARGC1A,CYP27B1,VDR,PPARD,FHL2,HSD11B1,PIK3CA,NCOA3,MED1,SIN3B,PPARG,ARNTL,CLOCK,TGS1,NCOA2,CYP1A1,NCOR1,CARM1,PRKACB,ARNT,CBR1,ALOX15,PRKAA2,GPX4,SIN3A,NPAS2,PTEN,ESRRA,TBL1XR1,GBA,SP1,RXRA,PPARA,MTF1,NCOA6,RXRB
1259	1	TRUE	4.18e-06	154	326	21	0.064	0.136	REAC:R-HSA-8957322	rea	58	Metabolism of steroids	2	CREBBP,NR1H4,SREBF1,SMARCD3,NCOA1,AKR1B1,TBL1X,CYP27B1,VDR,HSD11B1,MED1,TGS1,NCOA2,CARM1,TBL1XR1,SP1,RXRA,PPARA,MTF1,NCOA6,RXRB
1260	1	TRUE	6.65e-09	59	326	16	0.049	0.271	REAC:R-HSA-1655829	rea	58	Regulation of cholesterol biosynthesis by SREBP (SREBF)	3	CREBBP,SREBF1,SMARCD3,NCOA1,TBL1X,MED1,TGS1,NCOA2,CARM1,TBL1XR1,SP1,RXRA,PPARA,MTF1,NCOA6,RXRB
1261	1	TRUE	8.65e-11	46	326	16	0.049	0.348	REAC:R-HSA-2426168	rea	58	Activation of gene expression by SREBF (SREBP)	4	CREBBP,SREBF1,SMARCD3,NCOA1,TBL1X,MED1,TGS1,NCOA2,CARM1,TBL1XR1,SP1,RXRA,PPARA,MTF1,NCOA6,RXRB
1262	1	TRUE	2.92e-20	119	326	33	0.101	0.277	REAC:R-HSA-400206	rea	58	Regulation of lipid metabolism by Peroxisome proliferator-activated receptor alpha (PPARalpha)	2	CREBBP,NR1H4,RORA,SREBF1,SMARCD3,NCOA1,TBL1X,NRF1,AHR,PPARGC1A,FHL2,NCOA3,MED1,SIN3B,PPARG,ARNTL,CLOCK,TGS1,NCOA2,CYP1A1,NCOR1,CARM1,ARNT,SIN3A,NPAS2,ESRRA,TBL1XR1,SP1,RXRA,PPARA,MTF1,NCOA6,RXRB
1263	1	TRUE	2.79e-18	117	326	31	0.095	0.265	REAC:R-HSA-1989781	rea	58	PPARA activates gene expression	3	CREBBP,NR1H4,RORA,SREBF1,SMARCD3,NCOA1,TBL1X,NRF1,AHR,PPARGC1A,FHL2,NCOA3,MED1,PPARG,ARNTL,CLOCK,TGS1,NCOA2,CYP1A1,NCOR1,CARM1,ARNT,NPAS2,ESRRA,TBL1XR1,SP1,RXRA,PPARA,MTF1,NCOA6,RXRB
1264	1	TRUE	1.86e-07	29	326	11	0.034	0.379	REAC:R-HSA-5601884	rea	167	PIWI-interacting RNA (piRNA) biogenesis	1	POLR2J,POLR2B,POLR2E,POLR2C,POLR2I,POLR2D,POLR2K,POLR2H,POLR2G,POLR2L,POLR2A
1265	1	TRUE	0.00212	54	326	10	0.031	0.185	REAC:R-HSA-9006927	rea	7	Signaling by Non-Receptor Tyrosine Kinases	1	RHOA,HIF1A,CDKN1B,HBEGF,NR3C1,EPAS1,KRAS,NRG1,LRRK2,NRAS
1266	1	TRUE	0.00212	54	326	10	0.031	0.185	REAC:R-HSA-8848021	rea	7	Signaling by PTK6	2	RHOA,HIF1A,CDKN1B,HBEGF,NR3C1,EPAS1,KRAS,NRG1,LRRK2,NRAS
1267	1	TRUE	3.16e-08	47	326	14	0.043	0.298	REAC:R-HSA-76042	rea	251	RNA Polymerase II Transcription Initiation And Promoter Clearance	1	POLR2J,POLR2B,POLR2E,POLR2C,POLR2I,TAF12,GTF2A2,POLR2D,POLR2K,POLR2H,TAF10,POLR2G,POLR2L,POLR2A
1268	1	TRUE	3.16e-08	47	326	14	0.043	0.298	REAC:R-HSA-75953	rea	251	RNA Polymerase II Transcription Initiation	2	POLR2J,POLR2B,POLR2E,POLR2C,POLR2I,TAF12,GTF2A2,POLR2D,POLR2K,POLR2H,TAF10,POLR2G,POLR2L,POLR2A
1269	1	TRUE	3.16e-08	47	326	14	0.043	0.298	REAC:R-HSA-73776	rea	251	RNA Polymerase II Promoter Escape	2	POLR2J,POLR2B,POLR2E,POLR2C,POLR2I,TAF12,GTF2A2,POLR2D,POLR2K,POLR2H,TAF10,POLR2G,POLR2L,POLR2A
1270	1	TRUE	0.000258	18	326	7	0.021	0.389	REAC:R-HSA-881907	rea	322	Gastrin-CREB signalling pathway via PKC and MAPK	1	MAPK1,MAPK3,HBEGF,CREB1,KRAS,MAPK7,NRAS
1271	1	TRUE	0.00714	38	326	8	0.025	0.211	REAC:R-HSA-5674135	rea	330	MAP2K and MAPK activation	1	MAPK1,MAPK3,CSK,RAF1,KRAS,ARRB2,MAP2K1,NRAS
1272	1	TRUE	7.41e-08	27	326	11	0.034	0.407	REAC:R-HSA-77075	rea	245	RNA Pol II CTD phosphorylation and interaction with CE	1	POLR2J,POLR2B,POLR2E,POLR2C,POLR2I,POLR2D,POLR2K,POLR2H,POLR2G,POLR2L,POLR2A
1273	1	TRUE	0.00469	11	326	5	0.015	0.455	REAC:R-HSA-1234158	rea	264	Regulation of gene expression by Hypoxia-inducible Factor	1	CREBBP,HIF1A,CA9,EPAS1,ARNT
1274	1	TRUE	4.49e-06	281	326	29	0.089	0.103	REAC:R-HSA-1852241	rea	43	Organelle biogenesis and maintenance	1	CREBBP,PRKACA,MEF2C,SMARCD3,NCOA1,TBL1X,GABPB1,NRF1,PPARGC1A,MAPK14,ATF2,CREB1,MED1,TGS1,NCOA2,NCOR1,CARM1,PPRC1,GABPA,PRKAA2,HCFC1,ESRRA,TBL1XR1,MAPK11,RXRA,PPARA,MAPK12,NCOA6,CALM1
1275	1	TRUE	7.05e-18	94	326	28	0.086	0.298	REAC:R-HSA-1592230	rea	43	Mitochondrial biogenesis	2	CREBBP,MEF2C,SMARCD3,NCOA1,TBL1X,GABPB1,NRF1,PPARGC1A,MAPK14,ATF2,CREB1,MED1,TGS1,NCOA2,NCOR1,CARM1,PPRC1,GABPA,PRKAA2,HCFC1,ESRRA,TBL1XR1,MAPK11,RXRA,PPARA,MAPK12,NCOA6,CALM1
1276	1	TRUE	1.07e-19	55	326	24	0.074	0.436	REAC:R-HSA-2151201	rea	43	Transcriptional activation of mitochondrial biogenesis	3	CREBBP,MEF2C,SMARCD3,NCOA1,TBL1X,GABPB1,NRF1,PPARGC1A,ATF2,CREB1,MED1,TGS1,NCOA2,NCOR1,CARM1,PPRC1,GABPA,HCFC1,ESRRA,TBL1XR1,RXRA,PPARA,NCOA6,CALM1
1277	1	TRUE	0.00262	10	326	5	0.015	0.5	REAC:R-HSA-2151209	rea	43	Activation of PPARGC1A (PGC-1alpha) by phosphorylation	3	PPARGC1A,MAPK14,PRKAA2,MAPK11,MAPK12
1278	1	TRUE	0.000784	60	326	11	0.034	0.183	REAC:R-HSA-75955	rea	95	RNA Polymerase II Transcription Elongation	1	POLR2J,POLR2B,POLR2E,POLR2C,POLR2I,POLR2D,POLR2K,POLR2H,POLR2G,POLR2L,POLR2A
1279	1	TRUE	0.000784	60	326	11	0.034	0.183	REAC:R-HSA-112382	rea	95	Formation of RNA Pol II elongation complex	2	POLR2J,POLR2B,POLR2E,POLR2C,POLR2I,POLR2D,POLR2K,POLR2H,POLR2G,POLR2L,POLR2A
1280	1	TRUE	6.39e-07	32	326	11	0.034	0.344	REAC:R-HSA-113418	rea	95	Formation of the Early Elongation Complex	2	POLR2J,POLR2B,POLR2E,POLR2C,POLR2I,POLR2D,POLR2K,POLR2H,POLR2G,POLR2L,POLR2A
1281	1	TRUE	0.00784	12	326	5	0.015	0.417	REAC:R-HSA-6803211	rea	10	TP53 Regulates Transcription of Death Receptors and Ligands	1	TP63,TP73,PPP1R13B,TP53,TP53BP2
1282	1	TRUE	0.00618	102	326	13	0.04	0.127	REAC:R-HSA-9006936	rea	144	Signaling by TGF-beta family members	1	RHOA,TFDP2,MYC,NCOR1,SMAD4,FOXH1,SMAD3,SMAD1,TGIF1,NOG,SP1,TRIM33,TFDP1
1283	1	TRUE	0.0327	73	326	10	0.031	0.137	REAC:R-HSA-170834	rea	144	Signaling by TGF-beta Receptor Complex	2	RHOA,TFDP2,MYC,NCOR1,SMAD4,SMAD3,TGIF1,SP1,TRIM33,TFDP1
1284	1	TRUE	0.0027	44	326	9	0.028	0.205	REAC:R-HSA-2173793	rea	144	Transcriptional activity of SMAD2/SMAD3:SMAD4 heterotrimer	3	TFDP2,MYC,NCOR1,SMAD4,SMAD3,TGIF1,SP1,TRIM33,TFDP1
1285	1	TRUE	0.0188	32	326	7	0.021	0.219	REAC:R-HSA-2173796	rea	144	SMAD2/SMAD3:SMAD4 heterotrimer regulates transcription	4	TFDP2,MYC,SMAD4,SMAD3,TGIF1,SP1,TFDP1
1286	1	TRUE	2.1e-05	43	326	11	0.034	0.256	REAC:R-HSA-168325	rea	215	Viral Messenger RNA Synthesis	1	POLR2J,POLR2B,POLR2E,POLR2C,POLR2I,POLR2D,POLR2K,POLR2H,POLR2G,POLR2L,POLR2A
1287	1	TRUE	9.6e-19	431	326	57	0.175	0.132	REAC:R-HSA-9006934	rea	159	Signaling by Receptor Tyrosine Kinases	1	POLR2J,IGF1,HGF,POLR2B,RHOA,FGF10,PRKACA,MEF2C,PGR,ESR1,CMA1,POLR2E,MAPK1,PDGFB,FLT1,MAPK3,POLR2C,CSK,POLR2I,CAV1,MAPK14,HBEGF,PPP2CA,STAT1,CREB1,PIK3CA,ATF1,STAT5A,KRAS,NGF,YAP1,MAP2K5,ITGAV,IGF1R,NCOR1,PRKACB,PSEN2,POLR2D,POLR2K,VEGFC,NRG1,POLR2H,MAPK7,STAT6,MLST8,POLR2G,STAT5B,BDNF,POLR2L,POLR2A,LCK,MAPK11,MAPK12,PDGFA,CALM1,MTOR,NRAS
1288	1	TRUE	0.0132	53	326	9	0.028	0.17	REAC:R-HSA-186797	rea	159	Signaling by PDGF	2	PDGFB,STAT1,PIK3CA,STAT5A,KRAS,STAT6,STAT5B,PDGFA,NRAS
1289	1	TRUE	5.73e-05	29	326	9	0.028	0.31	REAC:R-HSA-186763	rea	159	Downstream signal transduction	3	PDGFB,STAT1,PIK3CA,STAT5A,KRAS,STAT6,STAT5B,PDGFA,NRAS
1290	1	TRUE	1.44e-06	94	326	17	0.052	0.181	REAC:R-HSA-166520	rea	159	Signaling by NTRKs	2	RHOA,MEF2C,MAPK1,MAPK3,MAPK14,PPP2CA,CREB1,PIK3CA,ATF1,KRAS,NGF,MAP2K5,MAPK7,BDNF,MAPK11,MAPK12,NRAS
1291	1	TRUE	6.13e-07	78	326	16	0.049	0.205	REAC:R-HSA-187037	rea	159	Signaling by NTRK1 (TRKA)	3	RHOA,MEF2C,MAPK1,MAPK3,MAPK14,PPP2CA,CREB1,PIK3CA,ATF1,KRAS,NGF,MAP2K5,MAPK7,MAPK11,MAPK12,NRAS
1292	1	TRUE	1.3e-05	25	326	9	0.028	0.36	REAC:R-HSA-198725	rea	159	Nuclear Events (kinase and transcription factor activation)	4	MEF2C,MAPK1,MAPK3,MAPK14,PPP2CA,CREB1,ATF1,MAPK7,MAPK11
1293	1	TRUE	3.98e-05	103	326	16	0.049	0.155	REAC:R-HSA-194138	rea	159	Signaling by VEGF	2	RHOA,PRKACA,FLT1,CAV1,MAPK14,PIK3CA,KRAS,ITGAV,PRKACB,VEGFC,MLST8,MAPK11,MAPK12,CALM1,MTOR,NRAS
1294	1	TRUE	0.000496	95	326	14	0.043	0.147	REAC:R-HSA-4420097	rea	159	VEGFA-VEGFR2 Pathway	3	RHOA,PRKACA,CAV1,MAPK14,PIK3CA,KRAS,ITGAV,PRKACB,MLST8,MAPK11,MAPK12,CALM1,MTOR,NRAS
1295	1	TRUE	0.0185	43	326	8	0.025	0.186	REAC:R-HSA-1433557	rea	159	Signaling by SCF-KIT	2	CMA1,STAT1,PIK3CA,STAT5A,KRAS,STAT5B,LCK,NRAS
1296	1	TRUE	2.73e-05	44	326	11	0.034	0.25	REAC:R-HSA-1236394	rea	159	Signaling by ERBB4	2	PGR,ESR1,HBEGF,PIK3CA,STAT5A,KRAS,YAP1,NCOR1,PSEN2,NRG1,NRAS
1297	1	TRUE	0.000315	26	326	8	0.025	0.308	REAC:R-HSA-1251985	rea	159	Nuclear signaling by ERBB4	3	PGR,ESR1,HBEGF,STAT5A,YAP1,NCOR1,PSEN2,NRG1
1298	1	TRUE	4.83e-08	87	326	18	0.055	0.207	REAC:R-HSA-190236	rea	159	Signaling by FGFR	2	POLR2J,POLR2B,FGF10,POLR2E,MAPK1,MAPK3,POLR2C,POLR2I,PPP2CA,PIK3CA,KRAS,POLR2D,POLR2K,POLR2H,POLR2G,POLR2L,POLR2A,NRAS
1299	1	TRUE	2.04e-09	73	326	18	0.055	0.247	REAC:R-HSA-5654738	rea	159	Signaling by FGFR2	3	POLR2J,POLR2B,FGF10,POLR2E,MAPK1,MAPK3,POLR2C,POLR2I,PPP2CA,PIK3CA,KRAS,POLR2D,POLR2K,POLR2H,POLR2G,POLR2L,POLR2A,NRAS
1300	1	TRUE	4.52e-08	26	326	11	0.034	0.423	REAC:R-HSA-6803529	rea	159	FGFR2 alternative splicing	4	POLR2J,POLR2B,POLR2E,POLR2C,POLR2I,POLR2D,POLR2K,POLR2H,POLR2G,POLR2L,POLR2A
1301	1	TRUE	0.000418	152	326	18	0.055	0.118	REAC:R-HSA-168898	rea	159	Toll-Like Receptors Cascades	1	MAP2K4,MEF2C,MAPK1,MAPK3,MAPK14,PPP2CA,ATF2,CREB1,ATF1,TLR2,MAPK7,NOD2,FADD,MAP2K1,JUN,MAPK11,IRF7,CHUK
1302	1	TRUE	3.29e-06	99	326	17	0.052	0.172	REAC:R-HSA-168164	rea	159	Toll Like Receptor 3 (TLR3) Cascade	2	MAP2K4,MEF2C,MAPK1,MAPK3,MAPK14,PPP2CA,ATF2,CREB1,ATF1,MAPK7,NOD2,FADD,MAP2K1,JUN,MAPK11,IRF7,CHUK
1303	1	TRUE	1.74e-05	85	326	15	0.046	0.176	REAC:R-HSA-168176	rea	159	Toll Like Receptor 5 (TLR5) Cascade	2	MAP2K4,MEF2C,MAPK1,MAPK3,MAPK14,PPP2CA,ATF2,CREB1,ATF1,MAPK7,NOD2,MAP2K1,JUN,MAPK11,CHUK
1304	1	TRUE	1.74e-05	85	326	15	0.046	0.176	REAC:R-HSA-168142	rea	159	Toll Like Receptor 10 (TLR10) Cascade	2	MAP2K4,MEF2C,MAPK1,MAPK3,MAPK14,PPP2CA,ATF2,CREB1,ATF1,MAPK7,NOD2,MAP2K1,JUN,MAPK11,CHUK
1305	1	TRUE	1.74e-05	85	326	15	0.046	0.176	REAC:R-HSA-975871	rea	159	MyD88 cascade initiated on plasma membrane	3	MAP2K4,MEF2C,MAPK1,MAPK3,MAPK14,PPP2CA,ATF2,CREB1,ATF1,MAPK7,NOD2,MAP2K1,JUN,MAPK11,CHUK
1306	1	TRUE	1.93e-05	98	326	16	0.049	0.163	REAC:R-HSA-168138	rea	159	Toll Like Receptor 9 (TLR9) Cascade	2	MAP2K4,MEF2C,MAPK1,MAPK3,MAPK14,PPP2CA,ATF2,CREB1,ATF1,MAPK7,NOD2,MAP2K1,JUN,MAPK11,IRF7,CHUK
1307	1	TRUE	1.04e-05	94	326	16	0.049	0.17	REAC:R-HSA-168181	rea	159	Toll Like Receptor 7/8 (TLR7/8) Cascade	2	MAP2K4,MEF2C,MAPK1,MAPK3,MAPK14,PPP2CA,ATF2,CREB1,ATF1,MAPK7,NOD2,MAP2K1,JUN,MAPK11,IRF7,CHUK
1308	1	TRUE	1.04e-05	94	326	16	0.049	0.17	REAC:R-HSA-975155	rea	159	MyD88 dependent cascade initiated on endosome	3	MAP2K4,MEF2C,MAPK1,MAPK3,MAPK14,PPP2CA,ATF2,CREB1,ATF1,MAPK7,NOD2,MAP2K1,JUN,MAPK11,IRF7,CHUK
1309	1	TRUE	5.23e-05	92	326	15	0.046	0.163	REAC:R-HSA-975138	rea	159	TRAF6 mediated induction of NFkB and MAP kinases upon TLR7/8 or 9 activation	4	MAP2K4,MEF2C,MAPK1,MAPK3,MAPK14,PPP2CA,ATF2,CREB1,ATF1,MAPK7,NOD2,MAP2K1,JUN,MAPK11,CHUK
1310	1	TRUE	2.35e-05	126	326	18	0.055	0.143	REAC:R-HSA-166016	rea	159	Toll Like Receptor 4 (TLR4) Cascade	2	MAP2K4,MEF2C,MAPK1,MAPK3,MAPK14,PPP2CA,ATF2,CREB1,ATF1,TLR2,MAPK7,NOD2,FADD,MAP2K1,JUN,MAPK11,IRF7,CHUK
1311	1	TRUE	3.86e-06	100	326	17	0.052	0.17	REAC:R-HSA-166166	rea	159	MyD88-independent TLR4 cascade	3	MAP2K4,MEF2C,MAPK1,MAPK3,MAPK14,PPP2CA,ATF2,CREB1,ATF1,MAPK7,NOD2,FADD,MAP2K1,JUN,MAPK11,IRF7,CHUK
1312	1	TRUE	3.86e-06	100	326	17	0.052	0.17	REAC:R-HSA-937061	rea	159	TRIF(TICAM1)-mediated TLR4 signaling	4	MAP2K4,MEF2C,MAPK1,MAPK3,MAPK14,PPP2CA,ATF2,CREB1,ATF1,MAPK7,NOD2,FADD,MAP2K1,JUN,MAPK11,IRF7,CHUK
1313	1	TRUE	1.22e-05	95	326	16	0.049	0.168	REAC:R-HSA-181438	rea	159	Toll Like Receptor 2 (TLR2) Cascade	2	MAP2K4,MEF2C,MAPK1,MAPK3,MAPK14,PPP2CA,ATF2,CREB1,ATF1,TLR2,MAPK7,NOD2,MAP2K1,JUN,MAPK11,CHUK
1314	1	TRUE	1.22e-05	95	326	16	0.049	0.168	REAC:R-HSA-168188	rea	159	Toll Like Receptor TLR6:TLR2 Cascade	3	MAP2K4,MEF2C,MAPK1,MAPK3,MAPK14,PPP2CA,ATF2,CREB1,ATF1,TLR2,MAPK7,NOD2,MAP2K1,JUN,MAPK11,CHUK
1315	1	TRUE	1.22e-05	95	326	16	0.049	0.168	REAC:R-HSA-168179	rea	159	Toll Like Receptor TLR1:TLR2 Cascade	3	MAP2K4,MEF2C,MAPK1,MAPK3,MAPK14,PPP2CA,ATF2,CREB1,ATF1,TLR2,MAPK7,NOD2,MAP2K1,JUN,MAPK11,CHUK
1316	1	TRUE	1.22e-05	95	326	16	0.049	0.168	REAC:R-HSA-166058	rea	159	MyD88:Mal cascade initiated on plasma membrane	4	MAP2K4,MEF2C,MAPK1,MAPK3,MAPK14,PPP2CA,ATF2,CREB1,ATF1,TLR2,MAPK7,NOD2,MAP2K1,JUN,MAPK11,CHUK
1317	1	TRUE	1.7e-08	687	326	55	0.169	0.08	REAC:R-HSA-1280215	rea	159	Cytokine Signaling in Immune system	1	HGF,CD44,MAP2K4,RORA,PRKACA,PTGS2,MEF2C,MAPK1,HMOX1,HIF1A,MAPK3,RELB,MAPK14,PPP2CA,STAT1,ATF2,CREB1,FOXO3,EGR1,PIK3CA,ATF1,MT2A,IRF1,IL1B,STAT5A,SMARCA4,IL10,MYC,STAT4,IRF8,TP53,SOD1,POU2F1,ZEB1,FOXO1,IFNAR2,ALOX15,MAPK7,STAT6,SMAD3,NOD2,MAP2K1,STAT2,BCL2L1,IFNB1,STAT5B,JUN,LCK,MAPK11,IRF7,CHUK,CEBPD,TNF,MIF,CNTF
1318	1	TRUE	5.92e-10	464	326	46	0.141	0.099	REAC:R-HSA-449147	rea	159	Signaling by Interleukins	2	HGF,MAP2K4,RORA,PRKACA,PTGS2,MEF2C,MAPK1,HMOX1,HIF1A,MAPK3,MAPK14,PPP2CA,STAT1,ATF2,CREB1,FOXO3,PIK3CA,ATF1,IL1B,STAT5A,SMARCA4,IL10,MYC,STAT4,TP53,SOD1,POU2F1,ZEB1,FOXO1,ALOX15,MAPK7,STAT6,SMAD3,NOD2,MAP2K1,STAT2,BCL2L1,STAT5B,JUN,LCK,MAPK11,CHUK,CEBPD,TNF,MIF,CNTF
1319	1	TRUE	4.48e-07	111	326	19	0.058	0.171	REAC:R-HSA-6785807	rea	159	Interleukin-4 and 13 signaling	3	HGF,RORA,PTGS2,HMOX1,HIF1A,STAT1,FOXO3,IL1B,IL10,MYC,TP53,POU2F1,ZEB1,FOXO1,ALOX15,STAT6,BCL2L1,CEBPD,TNF
1320	1	TRUE	1.31e-06	71	326	15	0.046	0.211	REAC:R-HSA-448424	rea	159	Interleukin-17 signaling	3	MAP2K4,MEF2C,MAPK1,MAPK3,MAPK14,PPP2CA,ATF2,CREB1,ATF1,MAPK7,NOD2,MAP2K1,JUN,MAPK11,CHUK
1321	1	TRUE	2.19e-07	63	326	15	0.046	0.238	REAC:R-HSA-450294	rea	159	MAP kinase activation	4	MAP2K4,MEF2C,MAPK1,MAPK3,MAPK14,PPP2CA,ATF2,CREB1,ATF1,MAPK7,NOD2,MAP2K1,JUN,MAPK11,CHUK
1322	1	TRUE	4.31e-07	31	326	11	0.034	0.355	REAC:R-HSA-450282	rea	159	MAPK targets/ Nuclear events mediated by MAP kinases	5	MEF2C,MAPK1,MAPK3,MAPK14,PPP2CA,ATF2,CREB1,ATF1,MAPK7,JUN,MAPK11
1323	1	TRUE	6.79e-05	10	326	6	0.018	0.6	REAC:R-HSA-450341	rea	159	Activation of the AP-1 family of transcription factors	6	MAPK1,MAPK3,MAPK14,ATF2,JUN,MAPK11
1324	1	TRUE	0.00124	22	326	7	0.021	0.318	REAC:R-HSA-198753	rea	159	ERK/MAPK targets	6	MEF2C,MAPK1,MAPK3,MAPK14,PPP2CA,MAPK7,MAPK11
1325	1	TRUE	0.0472	107	326	12	0.037	0.112	REAC:R-HSA-211945	rea	152	Phase I - Functionalization of compounds	1	NR1H4,NCOA1,PTGS1,AHR,CYP27B1,NQO2,NCOA2,CYP1A1,ARNT,ALDH1A1,RXRA,CES1
1326	1	TRUE	8.43e-13	36	326	16	0.049	0.444	REAC:R-HSA-452723	rea	25	Transcriptional regulation of pluripotent stem cells	1	POLR2J,POLR2B,POLR2E,POLR2C,POLR2I,EPAS1,SMAD4,POLR2D,POLR2K,NR6A1,ZIC3,POLR2H,POLR2G,POLR2L,POLR2A,PBX1
1327	1	TRUE	0.00087	21	326	7	0.021	0.333	REAC:R-HSA-5621575	rea	121	CD209 (DC-SIGN) signaling	1	CREBBP,PRKACA,RELB,RAF1,KRAS,PRKACB,NRAS
1328	1	TRUE	1.42e-12	122	326	26	0.08	0.213	REAC:R-HSA-5619507	rea	63	Activation of HOX genes during differentiation	1	POLR2J,CREBBP,PAX6,POLR2B,KMT2C,POLR2E,YY1,POLR2C,POLR2I,EZH2,EGR2,NCOA3,NCOR1,MEIS1,POLR2D,POLR2K,POLR2H,KMT2D,POLR2G,JUN,POLR2L,POLR2A,PBX1,RXRA,HOXA4,NCOA6
1329	1	TRUE	1.42e-12	122	326	26	0.08	0.213	REAC:R-HSA-5617472	rea	63	Activation of anterior HOX genes in hindbrain development during early embryogenesis	2	POLR2J,CREBBP,PAX6,POLR2B,KMT2C,POLR2E,YY1,POLR2C,POLR2I,EZH2,EGR2,NCOA3,NCOR1,MEIS1,POLR2D,POLR2K,POLR2H,KMT2D,POLR2G,JUN,POLR2L,POLR2A,PBX1,RXRA,HOXA4,NCOA6
1330	1	TRUE	0.0261	45	326	8	0.025	0.178	REAC:R-HSA-109606	rea	165	Intrinsic Pathway for Apoptosis	1	TP63,TP73,PPP1R13B,TFDP2,TP53,TP53BP2,BCL2L1,TFDP1
1331	1	TRUE	0.012	30	326	7	0.021	0.233	REAC:R-HSA-114452	rea	165	Activation of BH3-only proteins	2	TP63,TP73,PPP1R13B,TFDP2,TP53,TP53BP2,TFDP1
1332	1	TRUE	3.71e-07	9	326	7	0.021	0.778	REAC:R-HSA-139915	rea	165	Activation of PUMA and translocation to mitochondria	3	TP63,TP73,PPP1R13B,TFDP2,TP53,TP53BP2,TFDP1
1333	1	TRUE	1.53e-11	850	326	69	0.212	0.081	REAC:R-HSA-1643685	rea	47	Disease	1	CFTR,POLR2J,CREBBP,HGF,POLR2B,HDAC7,MAP2K4,HDAC4,FGF10,GSK3B,ESR1,POLR2E,MAPK1,PDGFB,TBL1X,MAPK3,POLR2C,CSK,POLR2I,AP1S1,CDKN1B,HBEGF,PPP2CA,KAT2B,STAT1,CREB1,FOXO3,TAF12,PIK3CA,STAT5A,RAF1,KRAS,MYC,HMGA1,TLR2,STAT4,ESR2,GTF2A2,NCOR1,ARRB2,SMAD4,PSEN2,POLR2D,POLR2K,FOXO1,WNT3A,NRG1,IHH,POLR2H,TAF10,SMAD3,MLST8,POLR2G,MAP2K1,STAT5B,TBL1XR1,JUN,POLR2L,NPM1,POLR2A,LCK,NF1,PDGFA,ATG7,CALM1,MTOR,NRAS,…
1334	1	TRUE	2.29e-22	366	326	57	0.175	0.156	REAC:R-HSA-5663202	rea	47	Diseases of signal transduction	2	POLR2J,CREBBP,HGF,POLR2B,HDAC7,HDAC4,FGF10,GSK3B,ESR1,POLR2E,MAPK1,PDGFB,TBL1X,MAPK3,POLR2C,CSK,POLR2I,CDKN1B,HBEGF,PPP2CA,KAT2B,STAT1,CREB1,FOXO3,PIK3CA,STAT5A,RAF1,KRAS,MYC,ESR2,NCOR1,ARRB2,SMAD4,PSEN2,POLR2D,POLR2K,FOXO1,WNT3A,NRG1,IHH,POLR2H,SMAD3,MLST8,POLR2G,MAP2K1,STAT5B,TBL1XR1,POLR2L,POLR2A,LCK,NF1,PDGFA,ATG7,MTOR,NRAS,CHUK,CUX1
1335	1	TRUE	1.54e-07	93	326	18	0.055	0.194	REAC:R-HSA-2219528	rea	47	PI3K/AKT Signaling in Cancer	3	HGF,FGF10,GSK3B,ESR1,PDGFB,CDKN1B,HBEGF,CREB1,FOXO3,PIK3CA,ESR2,FOXO1,NRG1,MLST8,LCK,PDGFA,MTOR,CHUK
1336	1	TRUE	0.0175	68	326	10	0.031	0.147	REAC:R-HSA-2219530	rea	47	Constitutive Signaling by Aberrant PI3K in Cancer	4	HGF,FGF10,ESR1,PDGFB,HBEGF,PIK3CA,ESR2,NRG1,LCK,PDGFA
1337	1	TRUE	0.000224	25	326	8	0.025	0.32	REAC:R-HSA-5674400	rea	47	Constitutive Signaling by AKT1 E17K in Cancer	4	GSK3B,CDKN1B,CREB1,FOXO3,FOXO1,MLST8,MTOR,CHUK
1338	1	TRUE	0.0277	58	326	9	0.028	0.155	REAC:R-HSA-2644603	rea	47	Signaling by NOTCH1 in Cancer	3	CREBBP,HDAC7,HDAC4,TBL1X,KAT2B,MYC,NCOR1,PSEN2,TBL1XR1
1339	1	TRUE	0.0277	58	326	9	0.028	0.155	REAC:R-HSA-2644602	rea	47	Signaling by NOTCH1 PEST Domain Mutants in Cancer	4	CREBBP,HDAC7,HDAC4,TBL1X,KAT2B,MYC,NCOR1,PSEN2,TBL1XR1
1340	1	TRUE	0.0277	58	326	9	0.028	0.155	REAC:R-HSA-2644606	rea	47	Constitutive Signaling by NOTCH1 PEST Domain Mutants	5	CREBBP,HDAC7,HDAC4,TBL1X,KAT2B,MYC,NCOR1,PSEN2,TBL1XR1
1341	1	TRUE	0.0277	58	326	9	0.028	0.155	REAC:R-HSA-2894858	rea	47	Signaling by NOTCH1 HD+PEST Domain Mutants in Cancer	4	CREBBP,HDAC7,HDAC4,TBL1X,KAT2B,MYC,NCOR1,PSEN2,TBL1XR1
1342	1	TRUE	0.0277	58	326	9	0.028	0.155	REAC:R-HSA-2894862	rea	47	Constitutive Signaling by NOTCH1 HD+PEST Domain Mutants	5	CREBBP,HDAC7,HDAC4,TBL1X,KAT2B,MYC,NCOR1,PSEN2,TBL1XR1
1343	1	TRUE	9.05e-12	63	326	19	0.058	0.302	REAC:R-HSA-1226099	rea	47	Signaling by FGFR in disease	3	POLR2J,POLR2B,FGF10,POLR2E,POLR2C,POLR2I,STAT1,PIK3CA,STAT5A,KRAS,POLR2D,POLR2K,POLR2H,POLR2G,STAT5B,POLR2L,POLR2A,NRAS,CUX1
1344	1	TRUE	4.75e-10	43	326	15	0.046	0.349	REAC:R-HSA-5655253	rea	47	Signaling by FGFR2 in disease	4	POLR2J,POLR2B,FGF10,POLR2E,POLR2C,POLR2I,PIK3CA,KRAS,POLR2D,POLR2K,POLR2H,POLR2G,POLR2L,POLR2A,NRAS
1345	1	TRUE	5.23e-08	33	326	12	0.037	0.364	REAC:R-HSA-1839126	rea	47	FGFR2 mutant receptor activation	5	POLR2J,POLR2B,FGF10,POLR2E,POLR2C,POLR2I,POLR2D,POLR2K,POLR2H,POLR2G,POLR2L,POLR2A
1346	1	TRUE	5.36e-10	19	326	11	0.034	0.579	REAC:R-HSA-8851708	rea	47	Signaling by FGFR2 IIIa TM	6	POLR2J,POLR2B,POLR2E,POLR2C,POLR2I,POLR2D,POLR2K,POLR2H,POLR2G,POLR2L,POLR2A
1347	1	TRUE	0.0368	74	326	10	0.031	0.135	REAC:R-HSA-6802957	rea	47	Oncogenic MAPK signaling	3	MAPK1,MAPK3,CSK,RAF1,KRAS,ARRB2,MAP2K1,NF1,ATG7,NRAS
1348	1	TRUE	0.0497	4	326	3	0.009	0.75	REAC:R-HSA-6802953	rea	47	RAS signaling downstream of NF1 loss-of-function variants	4	KRAS,NF1,NRAS
1349	1	TRUE	0.00714	38	326	8	0.025	0.211	REAC:R-HSA-6802946	rea	47	Signaling by moderate kinase activity BRAF mutants	4	MAPK1,MAPK3,CSK,RAF1,KRAS,ARRB2,MAP2K1,NRAS
1350	1	TRUE	0.0277	58	326	9	0.028	0.155	REAC:R-HSA-6802952	rea	47	Signaling by BRAF and RAF fusions	4	MAPK1,MAPK3,CSK,RAF1,KRAS,ARRB2,MAP2K1,ATG7,NRAS
1351	1	TRUE	0.00714	38	326	8	0.025	0.211	REAC:R-HSA-6802955	rea	47	Paradoxical activation of RAF signaling by kinase inactive BRAF	4	MAPK1,MAPK3,CSK,RAF1,KRAS,ARRB2,MAP2K1,NRAS
1352	1	TRUE	0.00957	51	326	9	0.028	0.176	REAC:R-HSA-6802949	rea	47	Signaling by RAS mutants	4	MAPK1,MAPK3,CSK,RAF1,KRAS,ARRB2,MAP2K1,NF1,NRAS
1353	1	TRUE	0.00295	34	326	8	0.025	0.235	REAC:R-HSA-6802948	rea	47	Signaling by high-kinase activity BRAF mutants	4	MAPK1,MAPK3,CSK,RAF1,KRAS,ARRB2,MAP2K1,NRAS
1354	1	TRUE	1.86e-07	29	326	11	0.034	0.379	REAC:R-HSA-72086	rea	259	mRNA Capping	1	POLR2J,POLR2B,POLR2E,POLR2C,POLR2I,POLR2D,POLR2K,POLR2H,POLR2G,POLR2L,POLR2A
1355	1	TRUE	0.000767	299	326	26	0.08	0.087	REAC:R-HSA-5688426	rea	388	Deubiquitination	1	CFTR,BRCA1,MAT2B,RHOA,KEAP1,ESR1,HIF1A,YY1,KAT2B,RAD23B,ACTL6A,MYC,ARRB2,TP53,SMAD4,TAF10,SMAD3,NOD2,AR,ADRB2,SMAD1,PTEN,HCFC1,RUVBL1,TRRAP,MDM4
1356	1	TRUE	3.16e-08	47	326	14	0.043	0.298	REAC:R-HSA-73779	rea	381	RNA Polymerase II Transcription Pre-Initiation And Promoter Opening	1	POLR2J,POLR2B,POLR2E,POLR2C,POLR2I,TAF12,GTF2A2,POLR2D,POLR2K,POLR2H,TAF10,POLR2G,POLR2L,POLR2A
1357	1	TRUE	3.12e-19	199	326	40	0.123	0.201	REAC:R-HSA-9006931	rea	74	Signaling by Nuclear Receptors	1	KDM1A,POLR2J,CREBBP,POLR2B,PGR,NCOA1,ESR1,POLR2E,MAPK1,YY1,MAPK3,POLR2C,POLR2I,PPARD,KAT2B,ATF2,MYB,NCOA3,MED1,FOSB,FOXA1,MYC,ESR2,GTF2A2,NCOA2,CARM1,POU2F1,POLR2D,POLR2K,RUNX1,POLR2H,ALDH1A1,POLR2G,KAT5,JUN,POLR2L,POLR2A,SP1,RXRA,RXRB
1358	1	TRUE	2.83e-19	156	326	36	0.11	0.231	REAC:R-HSA-8939211	rea	74	ESR-mediated signaling	2	KDM1A,POLR2J,CREBBP,POLR2B,PGR,NCOA1,ESR1,POLR2E,MAPK1,YY1,MAPK3,POLR2C,POLR2I,KAT2B,ATF2,MYB,NCOA3,MED1,FOSB,FOXA1,MYC,ESR2,GTF2A2,NCOA2,CARM1,POU2F1,POLR2D,POLR2K,RUNX1,POLR2H,POLR2G,KAT5,JUN,POLR2L,POLR2A,SP1
1359	1	TRUE	7.79e-17	150	326	33	0.101	0.22	REAC:R-HSA-9018519	rea	74	Estrogen-dependent gene expression	3	KDM1A,POLR2J,CREBBP,POLR2B,PGR,NCOA1,ESR1,POLR2E,YY1,POLR2C,POLR2I,KAT2B,ATF2,MYB,NCOA3,MED1,FOSB,FOXA1,MYC,GTF2A2,NCOA2,CARM1,POU2F1,POLR2D,POLR2K,RUNX1,POLR2H,POLR2G,KAT5,JUN,POLR2L,POLR2A,SP1
1360	1	TRUE	2.11e-16	51	326	21	0.064	0.412	REAC:R-HSA-383280	rea	389	Nuclear Receptor transcription pathway	1	NR1H4,RORA,PGR,ESR1,VDR,PPARD,NR3C1,MED1,NR0B2,PPARG,ESR2,NR1I3,NR1I2,NR6A1,NR3C2,AR,ESRRA,NR2F1,RXRA,PPARA,RXRB
1361	1	TRUE	0.000172	52	326	11	0.034	0.212	REAC:R-HSA-72165	rea	89	mRNA Splicing - Minor Pathway	1	POLR2J,POLR2B,POLR2E,POLR2C,POLR2I,POLR2D,POLR2K,POLR2H,POLR2G,POLR2L,POLR2A
1362	1	TRUE	0.0285	34	326	7	0.021	0.206	REAC:R-HSA-8953750	rea	217	Transcriptional Regulation by E2F6	1	BRCA1,RAD51,RBBP8,EZH2,TFDP2,MAX,TFDP1
1363	1	TRUE	2.63e-07	120	326	20	0.061	0.167	REAC:R-HSA-8878166	rea	164	Transcriptional regulation by RUNX2	1	HDAC4,GSK3B,ESR1,ABL1,MAPK1,MAPK3,PPARGC1A,NR3C1,STAT1,RUNX2,SOX9,YAP1,RB1,SMAD4,RUNX1,IHH,AR,SMAD1,ESRRA,MAF
1364	1	TRUE	2.2e-08	31	326	12	0.037	0.387	REAC:R-HSA-8941326	rea	164	RUNX2 regulates bone development	2	HDAC4,ABL1,MAPK1,MAPK3,RUNX2,YAP1,RB1,SMAD4,IHH,AR,SMAD1,MAF
1365	1	TRUE	0.000157	24	326	8	0.025	0.333	REAC:R-HSA-8940973	rea	164	RUNX2 regulates osteoblast differentiation	3	ABL1,MAPK1,MAPK3,RUNX2,YAP1,RB1,AR,MAF
1366	1	TRUE	0.00555	6	326	4	0.012	0.667	REAC:R-HSA-5674499	rea	310	Negative feedback regulation of MAPK pathway	1	MAPK1,MAPK3,RAF1,MAP2K1
1367	1	TRUE	0.0257	150	326	15	0.046	0.1	REAC:R-HSA-162587	rea	116	HIV Life Cycle	1	POLR2J,POLR2B,POLR2E,POLR2C,POLR2I,TAF12,HMGA1,GTF2A2,POLR2D,POLR2K,POLR2H,TAF10,POLR2G,POLR2L,POLR2A
1368	1	TRUE	0.0358	137	326	14	0.043	0.102	REAC:R-HSA-162599	rea	116	Late Phase of HIV Life Cycle	2	POLR2J,POLR2B,POLR2E,POLR2C,POLR2I,TAF12,GTF2A2,POLR2D,POLR2K,POLR2H,TAF10,POLR2G,POLR2L,POLR2A
1369	1	TRUE	1.38e-05	72	326	14	0.043	0.194	REAC:R-HSA-167172	rea	116	Transcription of the HIV genome	3	POLR2J,POLR2B,POLR2E,POLR2C,POLR2I,TAF12,GTF2A2,POLR2D,POLR2K,POLR2H,TAF10,POLR2G,POLR2L,POLR2A
1370	1	TRUE	7.41e-08	27	326	11	0.034	0.407	REAC:R-HSA-167160	rea	116	RNA Pol II CTD phosphorylation and interaction with CE during HIV infection	4	POLR2J,POLR2B,POLR2E,POLR2C,POLR2I,POLR2D,POLR2K,POLR2H,POLR2G,POLR2L,POLR2A
1371	1	TRUE	1.9e-06	35	326	11	0.034	0.314	REAC:R-HSA-167287	rea	116	HIV elongation arrest and recovery	4	POLR2J,POLR2B,POLR2E,POLR2C,POLR2I,POLR2D,POLR2K,POLR2H,POLR2G,POLR2L,POLR2A
1372	1	TRUE	9.32e-07	33	326	11	0.034	0.333	REAC:R-HSA-167238	rea	116	Pausing and recovery of Tat-mediated HIV elongation	4	POLR2J,POLR2B,POLR2E,POLR2C,POLR2I,POLR2D,POLR2K,POLR2H,POLR2G,POLR2L,POLR2A
1373	1	TRUE	3.16e-08	47	326	14	0.043	0.298	REAC:R-HSA-167162	rea	116	RNA Polymerase II HIV Promoter Escape	4	POLR2J,POLR2B,POLR2E,POLR2C,POLR2I,TAF12,GTF2A2,POLR2D,POLR2K,POLR2H,TAF10,POLR2G,POLR2L,POLR2A
1374	1	TRUE	3.51e-05	45	326	11	0.034	0.244	REAC:R-HSA-167169	rea	116	HIV Transcription Elongation	4	POLR2J,POLR2B,POLR2E,POLR2C,POLR2I,POLR2D,POLR2K,POLR2H,POLR2G,POLR2L,POLR2A
1375	1	TRUE	4.61e-09	22	326	11	0.034	0.5	REAC:R-HSA-167242	rea	116	Abortive elongation of HIV-1 transcript in the absence of Tat	5	POLR2J,POLR2B,POLR2E,POLR2C,POLR2I,POLR2D,POLR2K,POLR2H,POLR2G,POLR2L,POLR2A
1376	1	TRUE	6.39e-07	32	326	11	0.034	0.344	REAC:R-HSA-167158	rea	116	Formation of the HIV-1 Early Elongation Complex	5	POLR2J,POLR2B,POLR2E,POLR2C,POLR2I,POLR2D,POLR2K,POLR2H,POLR2G,POLR2L,POLR2A
1377	1	TRUE	3.51e-05	45	326	11	0.034	0.244	REAC:R-HSA-167246	rea	116	Tat-mediated elongation of the HIV-1 transcript	5	POLR2J,POLR2B,POLR2E,POLR2C,POLR2I,POLR2D,POLR2K,POLR2H,POLR2G,POLR2L,POLR2A
1378	1	TRUE	3.51e-05	45	326	11	0.034	0.244	REAC:R-HSA-167200	rea	116	Formation of HIV-1 elongation complex containing HIV-1 Tat	6	POLR2J,POLR2B,POLR2E,POLR2C,POLR2I,POLR2D,POLR2K,POLR2H,POLR2G,POLR2L,POLR2A
1379	1	TRUE	1.9e-06	35	326	11	0.034	0.314	REAC:R-HSA-167290	rea	116	Pausing and recovery of HIV elongation	4	POLR2J,POLR2B,POLR2E,POLR2C,POLR2I,POLR2D,POLR2K,POLR2H,POLR2G,POLR2L,POLR2A
1380	1	TRUE	5.7e-05	47	326	11	0.034	0.234	REAC:R-HSA-167152	rea	116	Formation of HIV elongation complex in the absence of HIV Tat	4	POLR2J,POLR2B,POLR2E,POLR2C,POLR2I,POLR2D,POLR2K,POLR2H,POLR2G,POLR2L,POLR2A
1381	1	TRUE	9.32e-07	33	326	11	0.034	0.333	REAC:R-HSA-167243	rea	116	Tat-mediated HIV elongation arrest and recovery	4	POLR2J,POLR2B,POLR2E,POLR2C,POLR2I,POLR2D,POLR2K,POLR2H,POLR2G,POLR2L,POLR2A
1382	1	TRUE	3.16e-08	47	326	14	0.043	0.298	REAC:R-HSA-167161	rea	116	HIV Transcription Initiation	4	POLR2J,POLR2B,POLR2E,POLR2C,POLR2I,TAF12,GTF2A2,POLR2D,POLR2K,POLR2H,TAF10,POLR2G,POLR2L,POLR2A
1383	1	TRUE	0.00073	38	326	9	0.028	0.237	REAC:R-HSA-8864260	rea	184	Transcriptional regulation by the AP-2 (TFAP2) family of transcription factors	1	CREBBP,TFAP2C,ESR1,YY1,KDM5B,MYC,TFAP2A,PITX2,NPM1
1384	1	TRUE	0.0497	4	326	3	0.009	0.75	REAC:R-HSA-8866906	rea	184	TFAP2 (AP-2) family regulates transcription of other transcription factors	2	TFAP2C,TFAP2A,PITX2
1385	1	TRUE	0.0019	5	326	4	0.012	0.8	REAC:R-HSA-8866911	rea	184	TFAP2 (AP-2) family regulates transcription of cell cycle factors	2	TFAP2C,KDM5B,MYC,TFAP2A
1386	1	TRUE	0.000568	110	326	15	0.046	0.136	REAC:R-HSA-5696398	rea	17	Nucleotide Excision Repair	1	POLR2J,POLR2B,POLR2E,YY1,POLR2C,POLR2I,RAD23B,ACTL6A,POLR2D,POLR2K,POLR2H,POLR2G,RUVBL1,POLR2L,POLR2A
1387	1	TRUE	0.0108	78	326	11	0.034	0.141	REAC:R-HSA-6781827	rea	17	Transcription-Coupled Nucleotide Excision Repair (TC-NER)	2	POLR2J,POLR2B,POLR2E,POLR2C,POLR2I,POLR2D,POLR2K,POLR2H,POLR2G,POLR2L,POLR2A
1388	1	TRUE	0.00152	64	326	11	0.034	0.172	REAC:R-HSA-6782210	rea	17	Gap-filling DNA repair synthesis and ligation in TC-NER	3	POLR2J,POLR2B,POLR2E,POLR2C,POLR2I,POLR2D,POLR2K,POLR2H,POLR2G,POLR2L,POLR2A
1389	1	TRUE	0.00178	65	326	11	0.034	0.169	REAC:R-HSA-6782135	rea	17	Dual incision in TC-NER	3	POLR2J,POLR2B,POLR2E,POLR2C,POLR2I,POLR2D,POLR2K,POLR2H,POLR2G,POLR2L,POLR2A
1390	1	TRUE	0.000211	53	326	11	0.034	0.208	REAC:R-HSA-6781823	rea	17	Formation of TC-NER Pre-Incision Complex	3	POLR2J,POLR2B,POLR2E,POLR2C,POLR2I,POLR2D,POLR2K,POLR2H,POLR2G,POLR2L,POLR2A
1391	1	TRUE	0.000596	20	326	7	0.021	0.35	REAC:R-HSA-6803204	rea	173	TP53 Regulates Transcription of Genes Involved in Cytochrome C Release	1	CREBBP,TP63,TP73,PPP1R13B,BNIP3L,TP53,TP53BP2
1392	1	TRUE	9.36e-10	488	326	47	0.144	0.096	REAC:R-HSA-8953897	rea	212	Cellular responses to external stimuli	1	CREBBP,E2F2,MAP2K4,PGR,GSK3B,MAPK1,HIF1A,MAPK3,EZH2,CA9,CDKN1B,MAPK14,E2F3,NR3C1,TFDP2,EPAS1,CAT,MT2A,VHL,ETS1,EGLN1,HMGA1,RB1,TP53,RPTOR,SOD1,ARNT,CDKN2A,NR3C2,TNIK,ETS2,PRKAA2,MAPK7,MLST8,AR,IFNB1,CEBPB,KAT5,JUN,MAPK11,SP1,MTF1,MAP3K5,ATG7,TFDP1,MDM4,MTOR
1393	1	TRUE	6.13e-10	412	326	43	0.132	0.104	REAC:R-HSA-2262752	rea	212	Cellular responses to stress	2	CREBBP,E2F2,MAP2K4,PGR,GSK3B,MAPK1,HIF1A,MAPK3,EZH2,CA9,CDKN1B,MAPK14,E2F3,NR3C1,TFDP2,EPAS1,CAT,VHL,ETS1,EGLN1,HMGA1,RB1,TP53,RPTOR,SOD1,ARNT,CDKN2A,NR3C2,TNIK,ETS2,MAPK7,MLST8,AR,IFNB1,CEBPB,KAT5,JUN,MAPK11,SP1,MAP3K5,TFDP1,MDM4,MTOR
1394	1	TRUE	1e-07	194	326	26	0.08	0.134	REAC:R-HSA-2559583	rea	212	Cellular Senescence	3	E2F2,MAP2K4,MAPK1,MAPK3,EZH2,CDKN1B,MAPK14,E2F3,TFDP2,ETS1,HMGA1,RB1,TP53,CDKN2A,TNIK,ETS2,MAPK7,IFNB1,CEBPB,KAT5,JUN,MAPK11,SP1,MAP3K5,TFDP1,MDM4
1395	1	TRUE	2.57e-09	33	326	13	0.04	0.394	REAC:R-HSA-2559585	rea	212	Oncogene Induced Senescence	4	E2F2,MAPK1,MAPK3,E2F3,TFDP2,ETS1,RB1,TP53,CDKN2A,ETS2,SP1,TFDP1,MDM4
1396	1	TRUE	0.000102	124	326	17	0.052	0.137	REAC:R-HSA-2559580	rea	212	Oxidative Stress Induced Senescence	4	E2F2,MAP2K4,MAPK1,MAPK3,EZH2,MAPK14,E2F3,TFDP2,TP53,CDKN2A,TNIK,IFNB1,JUN,MAPK11,MAP3K5,TFDP1,MDM4
1397	1	TRUE	4.2e-19	71	326	26	0.08	0.366	REAC:R-HSA-400253	rea	285	Circadian Clock	1	CREBBP,RORA,SREBF1,MEF2C,SMARCD3,NCOA1,HIF1A,TBL1X,DBP,PPARGC1A,NR3C1,ATF2,CREB1,MED1,ARNTL,CLOCK,TGS1,NCOA2,NCOR1,CARM1,NPAS2,TBL1XR1,RXRA,PPARA,NCOA6,RXRB
1398	1	TRUE	1.94e-15	27	326	16	0.049	0.593	REAC:R-HSA-1368108	rea	285	BMAL1:CLOCK,NPAS2 activates circadian gene expression	2	CREBBP,SMARCD3,NCOA1,TBL1X,DBP,MED1,ARNTL,CLOCK,TGS1,NCOA2,CARM1,NPAS2,TBL1XR1,RXRA,PPARA,NCOA6
1399	1	TRUE	9.62e-16	22	326	15	0.046	0.682	REAC:R-HSA-1368082	rea	285	RORA activates gene expression	2	CREBBP,RORA,SREBF1,SMARCD3,NCOA1,TBL1X,MED1,TGS1,NCOA2,CARM1,TBL1XR1,RXRA,PPARA,NCOA6,RXRB
1400	1	TRUE	0.0151	31	326	7	0.021	0.226	REAC:R-HSA-1912408	rea	33	Pre-NOTCH Transcription and Translation	1	CREBBP,E2F3,TFDP2,KAT2B,TP53,JUN,TFDP1
1401	1	TRUE	0.0433	9	326	4	0.012	0.444	REAC:R-HSA-2428933	rea	422	SHC-related events triggered by IGF1R	1	IGF1,KRAS,IGF1R,NRAS
1402	1	TRUE	4.29e-07	238	326	28	0.086	0.118	REAC:R-HSA-8878171	rea	350	Transcriptional regulation by RUNX1	1	CREBBP,KMT2C,SPI1,TCF3,TP73,SMARCD3,ESR1,ABL1,GATA1,ELF2,KAT2B,MYB,ELF1,NFE2,RUNX2,SIN3B,SMARCA4,LMO2,ACTL6A,YAP1,TCF12,RUNX1,KMT2D,SIN3A,SMARCC1,GATA2,ZFPM1,PAX5
1403	1	TRUE	0.00555	6	326	4	0.012	0.667	REAC:R-HSA-8939245	rea	350	RUNX1 regulates transcription of genes involved in BCR signaling	2	ELF2,ELF1,RUNX1,PAX5
1404	1	TRUE	0.00965	20	326	6	0.018	0.3	REAC:R-HSA-167044	rea	213	Signalling to RAS	1	MAPK14,KRAS,NGF,MAPK11,MAPK12,NRAS
1405	1	TRUE	0.0124	13	326	5	0.015	0.385	REAC:R-HSA-171007	rea	213	p38MAPK events	2	MAPK14,KRAS,MAPK11,MAPK12,NRAS
1406	1	TRUE	0.0027	44	326	9	0.028	0.205	REAC:R-HSA-69236	rea	6	G1 Phase	1	E2F2,ABL1,CDKN1B,E2F3,PPP2CA,TFDP2,RB1,CDKN2A,TFDP1
1407	1	TRUE	0.0027	44	326	9	0.028	0.205	REAC:R-HSA-69231	rea	6	Cyclin D associated events in G1	2	E2F2,ABL1,CDKN1B,E2F3,PPP2CA,TFDP2,RB1,CDKN2A,TFDP1
1408	1	TRUE	1.85e-12	365	326	44	0.135	0.121	REAC:R-HSA-3700989	rea	174	Transcriptional Regulation by TP53	1	POLR2J,CREBBP,BRCA1,POLR2B,TP63,TP73,PPP1R13B,POLR2E,RBBP8,POLR2C,BNIP3L,POLR2I,CDKN1B,MAPK14,PPP2CA,TFDP2,ATF2,STK11,SGK1,TAF12,TP53,RPTOR,CARM1,TP53BP2,POLR2D,POLR2K,CDKN2A,PRKAA2,POLR2H,WRN,TAF10,MLST8,POLR2G,RNF34,PTEN,KAT5,JUN,POLR2L,NPM1,POLR2A,MAPK11,TFDP1,MDM4,MTOR
1409	1	TRUE	2.78e-07	64	326	15	0.046	0.234	REAC:R-HSA-6796648	rea	174	TP53 Regulates Transcription of DNA Repair Genes	2	POLR2J,BRCA1,POLR2B,POLR2E,POLR2C,POLR2I,ATF2,TP53,POLR2D,POLR2K,POLR2H,POLR2G,JUN,POLR2L,POLR2A
1410	1	TRUE	1.57e-06	160	326	22	0.067	0.138	REAC:R-HSA-5633007	rea	174	Regulation of TP53 Activity	2	BRCA1,TP63,TP73,PPP1R13B,RBBP8,MAPK14,PPP2CA,STK11,SGK1,TAF12,TP53,TP53BP2,CDKN2A,PRKAA2,WRN,TAF10,MLST8,RNF34,KAT5,MAPK11,MDM4,MTOR
1411	1	TRUE	0.0188	14	326	5	0.015	0.357	REAC:R-HSA-6804759	rea	174	Regulation of TP53 Activity through Association with Co-factors	3	TP63,TP73,PPP1R13B,TP53,TP53BP2
1412	1	TRUE	0.0104	92	326	12	0.037	0.13	REAC:R-HSA-6804756	rea	174	Regulation of TP53 Activity through Phosphorylation	3	BRCA1,RBBP8,MAPK14,STK11,TAF12,TP53,PRKAA2,WRN,TAF10,KAT5,MAPK11,MDM4
1413	1	TRUE	0.00579	37	326	8	0.025	0.216	REAC:R-HSA-6806003	rea	174	Regulation of TP53 Expression and Degradation	3	PPP2CA,SGK1,TP53,CDKN2A,MLST8,RNF34,MDM4,MTOR
1414	1	TRUE	0.00466	36	326	8	0.025	0.222	REAC:R-HSA-6804757	rea	174	Regulation of TP53 Degradation	4	PPP2CA,SGK1,TP53,CDKN2A,MLST8,RNF34,MDM4,MTOR
1415	1	TRUE	0.00247	661	326	42	0.129	0.064	REAC:R-HSA-109582	rea	421	Hemostasis	1	KDM1A,CREBBP,IGF1,HGF,CD44,RHOA,PRKACA,RCOR1,TGFB2,ABL1,MAPK1,PDGFB,GATA1,MAPK3,CSK,CAV1,MAPK14,PPP2CA,MYB,TGFB3,PIK3CA,NFE2,IRF1,RAF1,KRAS,ITGAV,ARRB2,TP53,SOD1,PRKACB,VEGFC,SIN3A,IFNB1,GATA2,ZFPM1,LCK,IRF7,MAFG,PDGFA,CALM1,NRAS,MIF
1416	1	TRUE	0.00242	155	326	17	0.052	0.11	REAC:R-HSA-983231	rea	421	Factors involved in megakaryocyte development and platelet production	2	KDM1A,CREBBP,PRKACA,RCOR1,ABL1,GATA1,MYB,NFE2,IRF1,TP53,PRKACB,SIN3A,IFNB1,GATA2,ZFPM1,IRF7,MAFG
1417	1	TRUE	4.01e-06	126	326	19	0.058	0.151	REAC:R-HSA-157118	rea	71	Signaling by NOTCH	1	CREBBP,HDAC7,HDAC4,HIF1A,TBL1X,E2F3,TFDP2,KAT2B,STAT1,CREB1,MYC,NCOR1,ARRB2,TP53,PSEN2,TBL1XR1,JUN,PBX1,TFDP1
1418	1	TRUE	0.00569	73	326	11	0.034	0.151	REAC:R-HSA-1980143	rea	71	Signaling by NOTCH1	2	CREBBP,HDAC7,HDAC4,HIF1A,TBL1X,KAT2B,MYC,NCOR1,ARRB2,PSEN2,TBL1XR1
1419	1	TRUE	0.00478	47	326	9	0.028	0.191	REAC:R-HSA-2122947	rea	71	NOTCH1 Intracellular Domain Regulates Transcription	3	CREBBP,HDAC7,HDAC4,HIF1A,TBL1X,KAT2B,MYC,NCOR1,TBL1XR1
1420	1	TRUE	0.000565	96	326	14	0.043	0.146	REAC:R-HSA-8878159	rea	4	Transcriptional regulation by RUNX3	1	CREBBP,HDAC4,KAT2B,FOXO3,KRAS,MYC,YAP1,LEF1,TP53,SMAD4,CDKN2A,TCF7L1,RUNX1,SMAD3
1421	1	TRUE	5.9e-12	88	326	22	0.067	0.25	REAC:R-HSA-381340	rea	241	Transcriptional regulation of white adipocyte differentiation	1	CREBBP,SREBF1,SMARCD3,NCOA1,TBL1X,PPARGC1A,EGR2,NCOA3,MED1,PPARG,TGS1,NCOA2,NCOR1,CARM1,CEBPB,TBL1XR1,RXRA,PPARA,NCOA6,RXRB,CEBPD,TNF
1422	1	TRUE	1.67e-07	276	326	31	0.095	0.112	REAC:R-HSA-4839726	rea	327	Chromatin organization	1	KDM1A,CREBBP,KMT2C,SMARCD3,NCOA1,MECOM,RCOR1,TBL1X,EZH2,KAT2B,ATF2,KDM5B,SUPT7L,TAF12,SMARCA4,CLOCK,PAX3,ACTL6A,NCOA2,NCOR1,CARM1,TAF10,KMT2D,HCFC1,KAT5,SMARCC1,RUVBL1,TBL1XR1,RUVBL2,SUPT3H,TRRAP
1423	1	TRUE	1.67e-07	276	326	31	0.095	0.112	REAC:R-HSA-3247509	rea	327	Chromatin modifying enzymes	2	KDM1A,CREBBP,KMT2C,SMARCD3,NCOA1,MECOM,RCOR1,TBL1X,EZH2,KAT2B,ATF2,KDM5B,SUPT7L,TAF12,SMARCA4,CLOCK,PAX3,ACTL6A,NCOA2,NCOR1,CARM1,TAF10,KMT2D,HCFC1,KAT5,SMARCC1,RUVBL1,TBL1XR1,RUVBL2,SUPT3H,TRRAP
1424	1	TRUE	0.000795	143	326	17	0.052	0.119	REAC:R-HSA-3214847	rea	327	HATs acetylate histones	3	CREBBP,NCOA1,KAT2B,ATF2,SUPT7L,TAF12,CLOCK,PAX3,ACTL6A,NCOA2,TAF10,HCFC1,KAT5,RUVBL1,RUVBL2,SUPT3H,TRRAP
1425	1	TRUE	0.000977	284	326	25	0.077	0.088	REAC:R-HSA-5683057	rea	60	MAPK family signaling cascades	1	HGF,FGF10,PRKACA,MAPK1,PDGFB,MAPK3,CSK,HBEGF,PPP2CA,FOXO3,NCOA3,RAF1,KRAS,MYC,ARRB2,PRKACB,FOXO1,NRG1,MAP2K1,ETV4,JUN,NF1,PDGFA,CALM1,NRAS
1426	1	TRUE	0.0188	14	326	5	0.015	0.357	REAC:R-HSA-6803205	rea	314	TP53 regulates transcription of several additional cell death genes whose specific roles in p53-dependent apoptosis remain uncertain	1	TP63,TP73,PPP1R13B,TP53,TP53BP2
