# Supplementary material for: Somatic mutations in early metazoan genes disrupt regulatory links between unicellular and multicellular genes in cancer
Source: eLife journal article supplement (doi:10.7554/elife.40947), 2019-02-25
Supplement: supp [file elife-40947-supp-v1.zip › elife_poa_e40947_Supplementary_File_5.txt]

Tumour	Gene	Pathway	P_value	Adj_p
ACC	NF1	KEGG_MAPK_SIGNALING_PATHWAY	0.349167522556023	0.642205163335947
ACC	CTNNB1	KEGG_WNT_SIGNALING_PATHWAY	0.216618380240039	0.519343626402305
ACC	CTNNB1	KEGG_FOCAL_ADHESION	0.172628612796672	0.469437066812103
ACC	CTNNB1	KEGG_ADHERENS_JUNCTION	0.00110206996879101	0.0392777736877116
ACC	CTNNB1	KEGG_TIGHT_JUNCTION	0.769626829409896	0.902934229715871
ACC	CTNNB1	KEGG_LEUKOCYTE_TRANSENDOTHELIAL_MIGRATION	0.891109458507509	0.957671432344397
ACC	CTNNB1	KEGG_MELANOGENESIS	0.0664820430437727	0.311616692430424
ACC	ALOX5	KEGG_ARACHIDONIC_ACID_METABOLISM	0.0746453497655713	0.328808572158366
BLCA	TP53	KEGG_MAPK_SIGNALING_PATHWAY	3.61916903185515e-19	2.21696723007577e-16
BLCA	TP53	KEGG_CELL_CYCLE	0.000777642832131089	0.0307325701520839
BLCA	TP53	KEGG_P53_SIGNALING_PATHWAY	5.59569410965136e-08	8.84570934978919e-06
BLCA	TP53	KEGG_APOPTOSIS	0.00645635127006291	0.107656924169619
BLCA	TP53	KEGG_WNT_SIGNALING_PATHWAY	2.88556506576144e-09	5.65628464190557e-07
BLCA	TP53	KEGG_NEUROTROPHIN_SIGNALING_PATHWAY	0.00381864072714923	0.0832133809407655
BLCA	AMOTL1	KEGG_TIGHT_JUNCTION	0.320884947697102	0.617512933905222
BLCA	NF1	KEGG_MAPK_SIGNALING_PATHWAY	0.979422010306574	0.994079616160555
BLCA	EP300	KEGG_CELL_CYCLE	0.000127286892424832	0.00770085699170234
BLCA	EP300	KEGG_WNT_SIGNALING_PATHWAY	0.872111134647533	0.951687832736652
BLCA	EP300	KEGG_NOTCH_SIGNALING_PATHWAY	0.372880390077953	0.660390441480668
BLCA	EP300	KEGG_TGF_BETA_SIGNALING_PATHWAY	0.919599695400304	0.969923521558536
BLCA	EP300	KEGG_ADHERENS_JUNCTION	0.0395103553193879	0.245754270573632
BLCA	EP300	KEGG_JAK_STAT_SIGNALING_PATHWAY	6.89912585822374e-08	1.04028203902232e-05
BLCA	EP300	KEGG_LONG_TERM_POTENTIATION	0.000450483569515505	0.0212268724270263
BLCA	EP300	KEGG_MELANOGENESIS	0.283456683374243	0.583892171868633
BLCA	PLXNA2	KEGG_AXON_GUIDANCE	0.343096151184174	0.635410100554972
BLCA	RB1	KEGG_CELL_CYCLE	0.0879839594913232	0.351275114726208
BLCA	EPHA2	KEGG_AXON_GUIDANCE	0.805907377488212	0.920701504459956
BLCA	RYR2	KEGG_CALCIUM_SIGNALING_PATHWAY	0.435190727551544	0.706027582384338
BLCA	UBE4B	KEGG_UBIQUITIN_MEDIATED_PROTEOLYSIS	0.127668684609155	0.41255548231267
BLCA	ABCA12	KEGG_ABC_TRANSPORTERS	0.776220078134422	0.906283034998247
BLCA	CLOCK	KEGG_CIRCADIAN_RHYTHM_MAMMAL	0.434604775529306	0.705809677707163
BLCA	FBXW7	KEGG_UBIQUITIN_MEDIATED_PROTEOLYSIS	0.988783301233173	0.997409679869593
BLCA	ATM	KEGG_CELL_CYCLE	0.690061561825903	0.860981742617278
BLCA	ATM	KEGG_P53_SIGNALING_PATHWAY	0.171430165260924	0.468410105860696
BLCA	ATM	KEGG_APOPTOSIS	0.78215636311312	0.910243089572965
BLCA	ITPR2	KEGG_CALCIUM_SIGNALING_PATHWAY	0.00401072130839267	0.0846572271083999
BLCA	ITPR2	KEGG_PHOSPHATIDYLINOSITOL_SIGNALING_SYSTEM	0.00404808897783235	0.0846572271083999
BLCA	ITPR2	KEGG_OOCYTE_MEIOSIS	0.495004260952821	0.746643990565469
BLCA	ITPR2	KEGG_GAP_JUNCTION	0.0869636985365934	0.349746085087055
BLCA	ITPR2	KEGG_LONG_TERM_POTENTIATION	0.0415753409394989	0.25277910455833
BLCA	ITPR2	KEGG_GNRH_SIGNALING_PATHWAY	0.620999917425707	0.827056316757884
BLCA	CUL1	KEGG_CELL_CYCLE	0.204228143937647	0.505847874332292
BLCA	CUL1	KEGG_OOCYTE_MEIOSIS	0.876578739440632	0.952929820581283
BLCA	CUL1	KEGG_UBIQUITIN_MEDIATED_PROTEOLYSIS	0.767973323310259	0.902521885512078
BLCA	CUL1	KEGG_WNT_SIGNALING_PATHWAY	0.178923932700407	0.475650228037485
BLCA	CUL1	KEGG_TGF_BETA_SIGNALING_PATHWAY	0.29442148843144	0.593845000284308
BLCA	ERCC6	KEGG_NUCLEOTIDE_EXCISION_REPAIR	0.0492481744107954	0.270258318813105
BLCA	ETV6	KEGG_DORSO_VENTRAL_AXIS_FORMATION	0.665423356423604	0.850812934320508
BLCA	ABCC1	KEGG_ABC_TRANSPORTERS	0.311395956725075	0.608208802682834
BLCA	PIKFYVE	KEGG_INOSITOL_PHOSPHATE_METABOLISM	0.774175974728892	0.905237261789295
BLCA	PIKFYVE	KEGG_PHOSPHATIDYLINOSITOL_SIGNALING_SYSTEM	0.569650714916708	0.796192889999242
BLCA	PIKFYVE	KEGG_ENDOCYTOSIS	0.0437849087948486	0.257206223788273
BLCA	PIKFYVE	KEGG_FC_GAMMA_R_MEDIATED_PHAGOCYTOSIS	0.0881952479495857	0.351668683951949
BLCA	PIKFYVE	KEGG_REGULATION_OF_ACTIN_CYTOSKELETON	0.00241435477103433	0.0633868910968025
BLCA	ABCC5	KEGG_ABC_TRANSPORTERS	0.786949825130919	0.912768666995046
BLCA	PRICKLE2	KEGG_WNT_SIGNALING_PATHWAY	0.111349473711274	0.386853771738588
BLCA	VCAN	KEGG_CELL_ADHESION_MOLECULES_CAMS	0.162515050296929	0.458362592218763
BLCA	EPHA7	KEGG_AXON_GUIDANCE	0.684064938602179	0.859305346573344
BLCA	GRM8	KEGG_NEUROACTIVE_LIGAND_RECEPTOR_INTERACTION	0.658296889004619	0.846492759004759
BLCA	PIK3C2B	KEGG_INOSITOL_PHOSPHATE_METABOLISM	0.0212988354329326	0.184571075223848
BLCA	PIK3C2B	KEGG_PHOSPHATIDYLINOSITOL_SIGNALING_SYSTEM	0.264167211325289	0.56716381997791
BLCA	LAMA2	KEGG_FOCAL_ADHESION	0.774611522459053	0.90553047848535
BLCA	LAMA2	KEGG_ECM_RECEPTOR_INTERACTION	0.698069878770808	0.865391206910282
BLCA	TLN1	KEGG_FOCAL_ADHESION	0.554214289480192	0.788580982757482
BLCA	EDC3	KEGG_RNA_DEGRADATION	0.494572133258053	0.746643990565469
BLCA	MAP4K3	KEGG_MAPK_SIGNALING_PATHWAY	0.869666901487432	0.951040834599954
BLCA	CSNK2A1	KEGG_WNT_SIGNALING_PATHWAY	0.586963259477711	0.807622800442235
BLCA	CSNK2A1	KEGG_ADHERENS_JUNCTION	0.152991082211648	0.446660175007831
BLCA	CSNK2A1	KEGG_TIGHT_JUNCTION	0.393188965862171	0.676676615801894
BLCA	ATR	KEGG_CELL_CYCLE	0.966760179832156	0.990023367236572
BLCA	ATR	KEGG_P53_SIGNALING_PATHWAY	0.254243381868082	0.557495120807598
BLCA	ZFYVE16	KEGG_TGF_BETA_SIGNALING_PATHWAY	0.373763631988929	0.661835114204786
BLCA	VTI1B	KEGG_SNARE_INTERACTIONS_IN_VESICULAR_TRANSPORT	0.980397692379904	0.994296128209379
BLCA	PARD3	KEGG_CHEMOKINE_SIGNALING_PATHWAY	0.87161353602304	0.951657333261689
BLCA	PARD3	KEGG_NEUROACTIVE_LIGAND_RECEPTOR_INTERACTION	3.11521483317136e-05	0.00234863235230096
BLCA	PARD3	KEGG_ENDOCYTOSIS	0.00139133566933437	0.0451539102488284
BLCA	PARD3	KEGG_ADHERENS_JUNCTION	0.00241401091274546	0.0633868910968025
BLCA	PARD3	KEGG_TIGHT_JUNCTION	0.554425444371042	0.788668182914453
BLCA	CREBBP	KEGG_CELL_CYCLE	0.00102797452964065	0.0375939491231642
BLCA	CREBBP	KEGG_WNT_SIGNALING_PATHWAY	0.948943982545009	0.981782253760477
BLCA	CREBBP	KEGG_NOTCH_SIGNALING_PATHWAY	0.436304948740455	0.706357167000373
BLCA	CREBBP	KEGG_TGF_BETA_SIGNALING_PATHWAY	0.0533758607069295	0.280785298827747
BLCA	CREBBP	KEGG_ADHERENS_JUNCTION	0.031079626598937	0.221696812442636
BLCA	CREBBP	KEGG_JAK_STAT_SIGNALING_PATHWAY	5.28561856367667e-08	8.49251599058935e-06
BLCA	CREBBP	KEGG_LONG_TERM_POTENTIATION	0.00334827810184401	0.0770339757656646
BLCA	CREBBP	KEGG_MELANOGENESIS	0.0511379879495205	0.27570254368114
BLCA	TJP1	KEGG_ADHERENS_JUNCTION	0.143600723402815	0.433905206706011
BLCA	TJP1	KEGG_TIGHT_JUNCTION	0.0461012213210585	0.26300236913137
BLCA	TJP1	KEGG_GAP_JUNCTION	0.187823221779395	0.485989770277717
BLCA	SLC8A2	KEGG_CALCIUM_SIGNALING_PATHWAY	0.273451221499514	0.576364606863814
BLCA	NRCAM	KEGG_CELL_ADHESION_MOLECULES_CAMS	0.928823140736626	0.973645019348005
BLCA	GLI3	KEGG_HEDGEHOG_SIGNALING_PATHWAY	0.122442812750247	0.406249833366679
BLCA	SETD2	KEGG_LYSINE_DEGRADATION	0.710690872799075	0.872431753299858
BLCA	MYH9	KEGG_TIGHT_JUNCTION	0.328278168342018	0.622934042191698
BLCA	MYH9	KEGG_REGULATION_OF_ACTIN_CYTOSKELETON	0.73681372734627	0.886292506347667
BLCA	FLNA	KEGG_MAPK_SIGNALING_PATHWAY	0.302487020101987	0.601278582043788
BLCA	FLNA	KEGG_FOCAL_ADHESION	0.801736425754295	0.91861336320059
BLCA	COL4A4	KEGG_FOCAL_ADHESION	0.513148612801002	0.75973440236169
BLCA	COL4A4	KEGG_ECM_RECEPTOR_INTERACTION	0.172011890734722	0.469214734509048
BLCA	CHD8	KEGG_WNT_SIGNALING_PATHWAY	0.388019218115076	0.672832031042422
BLCA	ROBO1	KEGG_AXON_GUIDANCE	0.691479156362149	0.861579864162906
BLCA	ESPL1	KEGG_CELL_CYCLE	0.117518419835668	0.397171735451511
BLCA	ESPL1	KEGG_OOCYTE_MEIOSIS	0.268488729159966	0.571062941514068
BLCA	TICAM1	KEGG_TOLL_LIKE_RECEPTOR_SIGNALING_PATHWAY	0.210174271252401	0.512979740553132
BLCA	HMGCR	KEGG_TERPENOID_BACKBONE_BIOSYNTHESIS	0.967711091283606	0.990023367236572
BLCA	CNOT1	KEGG_RNA_DEGRADATION	0.29982643164546	0.598614556234906
BLCA	COMT	KEGG_STEROID_HORMONE_BIOSYNTHESIS	0.35374862340248	0.646234263808466
BLCA	COMT	KEGG_TYROSINE_METABOLISM	0.00432463894869419	0.0872135521319995
BLCA	TSC1	KEGG_MTOR_SIGNALING_PATHWAY	0.281168520310085	0.582688989097689
BLCA	TSC1	KEGG_INSULIN_SIGNALING_PATHWAY	0.189282768106227	0.487346684269561
BLCA	KIDINS220	KEGG_NEUROTROPHIN_SIGNALING_PATHWAY	0.140772984234168	0.430451416575132
BLCA	CARD6	KEGG_NOD_LIKE_RECEPTOR_SIGNALING_PATHWAY	0.507075255481851	0.75495132598779
BLCA	ABCA2	KEGG_ABC_TRANSPORTERS	0.171239858839453	0.468410105860696
BLCA	ABCA2	KEGG_LYSOSOME	0.0353186336413513	0.235447396594611
BLCA	GUCY2C	KEGG_PURINE_METABOLISM	0.302093905407285	0.601201238951074
BLCA	IGF2R	KEGG_LYSOSOME	0.513388526358685	0.75973440236169
BLCA	MAP3K1	KEGG_MAPK_SIGNALING_PATHWAY	0.18508291095407	0.482945600457258
BLCA	MAP3K1	KEGG_UBIQUITIN_MEDIATED_PROTEOLYSIS	0.45856795123264	0.722111903925306
BLCA	MAP3K1	KEGG_RIG_I_LIKE_RECEPTOR_SIGNALING_PATHWAY	0.23676750590264	0.538912755539195
BLCA	MAP3K1	KEGG_NEUROTROPHIN_SIGNALING_PATHWAY	0.106555609326067	0.379583226428266
BLCA	MAP3K1	KEGG_GNRH_SIGNALING_PATHWAY	0.681336674872363	0.857828671321657
BLCA	A2M	KEGG_COMPLEMENT_AND_COAGULATION_CASCADES	0.234359578934424	0.537425885151214
BLCA	PTEN	KEGG_INOSITOL_PHOSPHATE_METABOLISM	0.601524284205812	0.815941020271225
BLCA	PTEN	KEGG_PHOSPHATIDYLINOSITOL_SIGNALING_SYSTEM	0.431280647793707	0.703207724010335
BLCA	PTEN	KEGG_P53_SIGNALING_PATHWAY	0.0536374515564398	0.281196375234451
BLCA	PTEN	KEGG_FOCAL_ADHESION	0.256512067660346	0.559282534696168
BLCA	PTEN	KEGG_TIGHT_JUNCTION	0.0308715403228067	0.220533503428446
BLCA	TLR3	KEGG_TOLL_LIKE_RECEPTOR_SIGNALING_PATHWAY	0.449925904933119	0.716562202510481
BLCA	RELN	KEGG_FOCAL_ADHESION	0.784016575282447	0.91195661694081
BLCA	RELN	KEGG_ECM_RECEPTOR_INTERACTION	0.170548740016188	0.468410105860696
BLCA	LRP2	KEGG_HEDGEHOG_SIGNALING_PATHWAY	0.22350661319837	0.526560603770407
BLCA	DAAM1	KEGG_WNT_SIGNALING_PATHWAY	0.601133184485833	0.815787624738389
BLCA	MPP5	KEGG_TIGHT_JUNCTION	0.954355791600492	0.984343917475548
BLCA	CLCA4	KEGG_OLFACTORY_TRANSDUCTION	0.634022826949213	0.833654108791151
BLCA	AGPS	KEGG_ETHER_LIPID_METABOLISM	0.951880853940557	0.983423148880013
BLCA	AGPS	KEGG_PEROXISOME	0.0453667910147232	0.261092142533941
BLCA	EXOSC10	KEGG_RNA_DEGRADATION	0.0918875114047036	0.355122042301853
BLCA	PIK3C2A	KEGG_INOSITOL_PHOSPHATE_METABOLISM	0.242515350149408	0.545216233269221
BLCA	PIK3C2A	KEGG_PHOSPHATIDYLINOSITOL_SIGNALING_SYSTEM	0.381237508474209	0.666955815520404
BLCA	PDGFC	KEGG_CYTOKINE_CYTOKINE_RECEPTOR_INTERACTION	0.01349587328919	0.149153643581438
BLCA	PDGFC	KEGG_FOCAL_ADHESION	0.13329500053132	0.420608454834112
BLCA	PDGFC	KEGG_GAP_JUNCTION	0.689973843598707	0.860981742617278
BLCA	PDGFC	KEGG_REGULATION_OF_ACTIN_CYTOSKELETON	0.429664250809448	0.701912111792175
BLCA	UGP2	KEGG_PENTOSE_AND_GLUCURONATE_INTERCONVERSIONS	0.0617672132748683	0.301930601656737
BLCA	UGP2	KEGG_GALACTOSE_METABOLISM	0.190057139273927	0.487375725280942
BLCA	UGP2	KEGG_STARCH_AND_SUCROSE_METABOLISM	0.0889395596620545	0.352780598136314
BLCA	UGP2	KEGG_AMINO_SUGAR_AND_NUCLEOTIDE_SUGAR_METABOLISM	0.061025050827163	0.300103624263434
BLCA	CS	KEGG_CITRATE_CYCLE_TCA_CYCLE	0.94403665732687	0.98044964273187
BLCA	CS	KEGG_GLYOXYLATE_AND_DICARBOXYLATE_METABOLISM	0.495848364431056	0.746643990565469
BLCA	GAA	KEGG_GALACTOSE_METABOLISM	0.726307509912245	0.88042825249491
BLCA	GAA	KEGG_STARCH_AND_SUCROSE_METABOLISM	0.0365828685663284	0.23792215979999
BLCA	GAA	KEGG_LYSOSOME	0.0329151217043837	0.227343980144232
BLCA	BUB1	KEGG_CELL_CYCLE	0.794654224518433	0.914510082157832
BLCA	BUB1	KEGG_OOCYTE_MEIOSIS	0.564987021112678	0.795115119536225
BLCA	BUB1	KEGG_PROGESTERONE_MEDIATED_OOCYTE_MATURATION	0.194113497683601	0.49351657348819
BLCA	EPHA3	KEGG_AXON_GUIDANCE	0.773547021430389	0.90470869447651
BLCA	ENPEP	KEGG_RENIN_ANGIOTENSIN_SYSTEM	0.234359578934424	0.537425885151214
BLCA	PRKCQ	KEGG_TIGHT_JUNCTION	0.0292000376874509	0.215973564100109
BLCA	PRKCQ	KEGG_T_CELL_RECEPTOR_SIGNALING_PATHWAY	0.194757557444138	0.494000729945651
BLCA	PRKCQ	KEGG_ADIPOCYTOKINE_SIGNALING_PATHWAY	0.575209925927524	0.799851446562294
BLCA	SEMA3A	KEGG_AXON_GUIDANCE	0.906117146685553	0.962724392261955
BLCA	MYH4	KEGG_TIGHT_JUNCTION	0.345269585440048	0.637405765096612
BLCA	GABRB2	KEGG_NEUROACTIVE_LIGAND_RECEPTOR_INTERACTION	0.128753647172202	0.414040974668349
BLCA	TAF1L	KEGG_BASAL_TRANSCRIPTION_FACTORS	0.712445466501059	0.872943870130876
BLCA	PDE3A	KEGG_PURINE_METABOLISM	0.271467800897265	0.574249104746119
BLCA	PDE3A	KEGG_INSULIN_SIGNALING_PATHWAY	0.633737234592923	0.833502232453736
BLCA	PDE3A	KEGG_PROGESTERONE_MEDIATED_OOCYTE_MATURATION	0.914799092180062	0.967408923441604
BLCA	ABCA7	KEGG_ABC_TRANSPORTERS	0.406269227060645	0.685815483021251
BLCA	RXRA	KEGG_PPAR_SIGNALING_PATHWAY	0.118719187357465	0.39971375997613
BLCA	RXRA	KEGG_ADIPOCYTOKINE_SIGNALING_PATHWAY	0.0264127665073191	0.203996473237379
BLCA	ABCA3	KEGG_ABC_TRANSPORTERS	0.211082582265458	0.513352657501537
BLCA	CTNNBL1	KEGG_SPLICEOSOME	0.35813217984543	0.64904835330345
BLCA	STAT1	KEGG_CHEMOKINE_SIGNALING_PATHWAY	0.032475687572396	0.226221900424345
BLCA	STAT1	KEGG_TOLL_LIKE_RECEPTOR_SIGNALING_PATHWAY	0.0590925143536613	0.294866141207949
BLCA	STAT1	KEGG_JAK_STAT_SIGNALING_PATHWAY	0.0468853259808313	0.264526393586756
BLCA	ABCA13	KEGG_ABC_TRANSPORTERS	0.875047780108341	0.952821163519814
BLCA	MTR	KEGG_CYSTEINE_AND_METHIONINE_METABOLISM	0.789282694122284	0.913903550054796
BLCA	MTR	KEGG_ONE_CARBON_POOL_BY_FOLATE	0.109652158046522	0.384296050842005
BLCA	LRP6	KEGG_WNT_SIGNALING_PATHWAY	0.454516341103643	0.719314493647151
BLCA	AGL	KEGG_STARCH_AND_SUCROSE_METABOLISM	0.347885089812569	0.640679878282687
BLCA	PDGFRA	KEGG_MAPK_SIGNALING_PATHWAY	0.857466795987202	0.945122168080331
BLCA	PDGFRA	KEGG_CALCIUM_SIGNALING_PATHWAY	0.0948704772666858	0.360653690234851
BLCA	PDGFRA	KEGG_CYTOKINE_CYTOKINE_RECEPTOR_INTERACTION	0.00328222968472308	0.0762301733174666
BLCA	PDGFRA	KEGG_ENDOCYTOSIS	0.00748598017872726	0.116091917297003
BLCA	PDGFRA	KEGG_FOCAL_ADHESION	0.566599313176669	0.795481806118046
BLCA	PDGFRA	KEGG_GAP_JUNCTION	0.4211807944622	0.695650988628922
BLCA	PDGFRA	KEGG_REGULATION_OF_ACTIN_CYTOSKELETON	0.194219574353793	0.493658207531516
BLCA	EPB41L2	KEGG_TIGHT_JUNCTION	0.140772984234168	0.430451416575132
BLCA	BRAF	KEGG_MAPK_SIGNALING_PATHWAY	0.876641388166373	0.952929820581283
BLCA	BRAF	KEGG_ERBB_SIGNALING_PATHWAY	0.0548333087980169	0.283660904674386
BLCA	BRAF	KEGG_CHEMOKINE_SIGNALING_PATHWAY	0.98772384337778	0.99708326181333
BLCA	BRAF	KEGG_MTOR_SIGNALING_PATHWAY	0.133743742064393	0.420608454834112
BLCA	BRAF	KEGG_FOCAL_ADHESION	0.070665638318364	0.321389290560689
BLCA	BRAF	KEGG_NATURAL_KILLER_CELL_MEDIATED_CYTOTOXICITY	0.0034554591182522	0.0785977626535963
BLCA	BRAF	KEGG_LONG_TERM_POTENTIATION	0.323130006970806	0.619037763549818
BLCA	BRAF	KEGG_NEUROTROPHIN_SIGNALING_PATHWAY	0.0140571248670335	0.151733348922682
BLCA	BRAF	KEGG_REGULATION_OF_ACTIN_CYTOSKELETON	0.523820027980488	0.769247841509854
BLCA	BRAF	KEGG_INSULIN_SIGNALING_PATHWAY	0.106606933957951	0.379583226428266
BLCA	BRAF	KEGG_PROGESTERONE_MEDIATED_OOCYTE_MATURATION	0.0663493825682545	0.311404693102067
BLCA	GALNT3	KEGG_O_GLYCAN_BIOSYNTHESIS	0.813057327856043	0.923808818724447
BLCA	ARHGAP35	KEGG_FOCAL_ADHESION	0.0142447265348006	0.152916281235028
BLCA	ARHGAP35	KEGG_LEUKOCYTE_TRANSENDOTHELIAL_MIGRATION	0.86876106113327	0.951040834599954
BLCA	ARHGAP35	KEGG_REGULATION_OF_ACTIN_CYTOSKELETON	0.138067934421779	0.425503077788212
BLCA	LTBP1	KEGG_TGF_BETA_SIGNALING_PATHWAY	0.978690272082989	0.993695572017546
BLCA	PPARGC1A	KEGG_INSULIN_SIGNALING_PATHWAY	0.727447275090668	0.881081406718195
BLCA	PPARGC1A	KEGG_ADIPOCYTOKINE_SIGNALING_PATHWAY	0.434201599499604	0.705477011229928
BLCA	KIT	KEGG_CYTOKINE_CYTOKINE_RECEPTOR_INTERACTION	0.023513156968006	0.191511774729863
BLCA	KIT	KEGG_ENDOCYTOSIS	0.00824939359178882	0.122527054727222
BLCA	KIT	KEGG_HEMATOPOIETIC_CELL_LINEAGE	0.887241055940324	0.956428683377817
BLCA	KIT	KEGG_MELANOGENESIS	0.61761783649324	0.824471862635555
BLCA	UNC5C	KEGG_AXON_GUIDANCE	0.564484365611936	0.795115119536225
BLCA	ROBO3	KEGG_AXON_GUIDANCE	0.258377309593108	0.560336931043599
BLCA	BRCA2	KEGG_HOMOLOGOUS_RECOMBINATION	0.173695201867499	0.470036092749067
BLCA	ARAP2	KEGG_ENDOCYTOSIS	0.690601287685709	0.860981742617278
BLCA	ADCY2	KEGG_PURINE_METABOLISM	0.441990595211325	0.710388623100393
BLCA	ADCY2	KEGG_CALCIUM_SIGNALING_PATHWAY	0.00148868685256388	0.0472188344400602
BLCA	ADCY2	KEGG_CHEMOKINE_SIGNALING_PATHWAY	0.871286581026628	0.951657333261689
BLCA	ADCY2	KEGG_OOCYTE_MEIOSIS	0.257730741527443	0.559844636017391
BLCA	ADCY2	KEGG_GAP_JUNCTION	0.0281886058954848	0.2109841958075
BLCA	ADCY2	KEGG_GNRH_SIGNALING_PATHWAY	0.657862013385493	0.846492759004759
BLCA	ADCY2	KEGG_PROGESTERONE_MEDIATED_OOCYTE_MATURATION	0.310051806093498	0.606550449405663
BLCA	ADCY2	KEGG_MELANOGENESIS	0.356539390708601	0.647598696874536
BLCA	DDX5	KEGG_SPLICEOSOME	0.270696385090718	0.573527772014263
BLCA	EPRS	KEGG_PORPHYRIN_AND_CHLOROPHYLL_METABOLISM	0.207721300031935	0.510148466523818
BLCA	EPRS	KEGG_AMINOACYL_TRNA_BIOSYNTHESIS	0.259805606649622	0.561407293279441
BLCA	SEMA3D	KEGG_AXON_GUIDANCE	0.228201885780389	0.53230456974894
BLCA	CACNA1E	KEGG_MAPK_SIGNALING_PATHWAY	0.315524381787732	0.612219497426098
BLCA	CACNA1E	KEGG_CALCIUM_SIGNALING_PATHWAY	0.438556615810743	0.707882756245566
BLCA	OR4K17	KEGG_OLFACTORY_TRANSDUCTION	0.244167488417942	0.547491547468371
BLCA	MSH6	KEGG_MISMATCH_REPAIR	0.156868971463887	0.451268796394939
BLCA	SOS2	KEGG_MAPK_SIGNALING_PATHWAY	0.754543329079645	0.894835589168597
BLCA	SOS2	KEGG_ERBB_SIGNALING_PATHWAY	0.1132674140351	0.390061373375588
BLCA	SOS2	KEGG_CHEMOKINE_SIGNALING_PATHWAY	0.84217559257152	0.937236385732856
BLCA	SOS2	KEGG_DORSO_VENTRAL_AXIS_FORMATION	0.39290057874064	0.676485614068188
BLCA	SOS2	KEGG_FOCAL_ADHESION	0.704588016413111	0.869825494612576
BLCA	SOS2	KEGG_GAP_JUNCTION	0.540224662632614	0.780359899552284
BLCA	SOS2	KEGG_JAK_STAT_SIGNALING_PATHWAY	0.00891996949646625	0.126500026863344
BLCA	SOS2	KEGG_NATURAL_KILLER_CELL_MEDIATED_CYTOTOXICITY	0.0624958526209968	0.303298371102074
BLCA	SOS2	KEGG_T_CELL_RECEPTOR_SIGNALING_PATHWAY	0.793089783191749	0.914412169256348
BLCA	SOS2	KEGG_B_CELL_RECEPTOR_SIGNALING_PATHWAY	0.197355331384026	0.497884067669199
BLCA	SOS2	KEGG_FC_EPSILON_RI_SIGNALING_PATHWAY	0.157694460756456	0.452846003479058
BLCA	SOS2	KEGG_NEUROTROPHIN_SIGNALING_PATHWAY	0.0911580307511534	0.354698547510041
BLCA	SOS2	KEGG_REGULATION_OF_ACTIN_CYTOSKELETON	0.466820692088523	0.725479055889664
BLCA	SOS2	KEGG_INSULIN_SIGNALING_PATHWAY	0.638377337149496	0.835680016215067
BLCA	SOS2	KEGG_GNRH_SIGNALING_PATHWAY	0.403004184523738	0.683538076550699
BLCA	ITGA11	KEGG_FOCAL_ADHESION	0.168970926471383	0.467011956137446
BLCA	ITGA11	KEGG_ECM_RECEPTOR_INTERACTION	0.74451939190895	0.890142885143714
BLCA	ITGA11	KEGG_REGULATION_OF_ACTIN_CYTOSKELETON	0.0379165519440057	0.241805553830679
BLCA	ECI2	KEGG_FATTY_ACID_METABOLISM	0.607567794556214	0.819539217512449
BLCA	ECI2	KEGG_PEROXISOME	0.581980398635634	0.803944508459873
BLCA	XYLB	KEGG_PENTOSE_AND_GLUCURONATE_INTERCONVERSIONS	0.479178007464817	0.735194685529535
BLCA	ACACA	KEGG_PYRUVATE_METABOLISM	0.221533377719379	0.525090359136066
BLCA	ACACA	KEGG_PROPANOATE_METABOLISM	0.476053868556608	0.733077825135013
BLCA	ACACA	KEGG_INSULIN_SIGNALING_PATHWAY	0.153893722156053	0.447437665633781
BLCA	CAD	KEGG_PYRIMIDINE_METABOLISM	0.304955137105638	0.602827061607139
BLCA	CAD	KEGG_ALANINE_ASPARTATE_AND_GLUTAMATE_METABOLISM	0.119845255815121	0.401603789466059
BLCA	PDGFRB	KEGG_MAPK_SIGNALING_PATHWAY	0.125300573743607	0.409944880435362
BLCA	PDGFRB	KEGG_CALCIUM_SIGNALING_PATHWAY	0.131028657677746	0.417419571778975
BLCA	PDGFRB	KEGG_CYTOKINE_CYTOKINE_RECEPTOR_INTERACTION	0.00502203672594849	0.0940014087806992
BLCA	PDGFRB	KEGG_FOCAL_ADHESION	0.0468565560397403	0.264526393586756
BLCA	PDGFRB	KEGG_GAP_JUNCTION	0.237889179588865	0.540461717466497
BLCA	PDGFRB	KEGG_REGULATION_OF_ACTIN_CYTOSKELETON	0.463292374276029	0.724661436367597
BLCA	OGDH	KEGG_CITRATE_CYCLE_TCA_CYCLE	0.163542480756984	0.459434111815079
BLCA	OGDH	KEGG_LYSINE_DEGRADATION	0.0020313233382725	0.0573237639768236
BLCA	OGDH	KEGG_TRYPTOPHAN_METABOLISM	0.299311218169938	0.598087288769121
BLCA	ASAP1	KEGG_ENDOCYTOSIS	0.626644831836319	0.829465335176951
BLCA	ASAP1	KEGG_FC_GAMMA_R_MEDIATED_PHAGOCYTOSIS	0.407206128900312	0.686510291164079
BLCA	CREB5	KEGG_VASOPRESSIN_REGULATED_WATER_REABSORPTION	0.229366176828138	0.533026940917341
BLCA	ATP2B1	KEGG_CALCIUM_SIGNALING_PATHWAY	0.0773078254689814	0.33208228328648
BLCA	FMN2	KEGG_DORSO_VENTRAL_AXIS_FORMATION	0.128753647172202	0.414040974668349
BLCA	VAV1	KEGG_CHEMOKINE_SIGNALING_PATHWAY	0.402367356035607	0.683363681676652
BLCA	VAV1	KEGG_FOCAL_ADHESION	0.306162723885402	0.603796670655101
BLCA	VAV1	KEGG_NATURAL_KILLER_CELL_MEDIATED_CYTOTOXICITY	0.00738612338417537	0.115663487750275
BLCA	VAV1	KEGG_T_CELL_RECEPTOR_SIGNALING_PATHWAY	0.148143458355294	0.440624173491705
BLCA	VAV1	KEGG_B_CELL_RECEPTOR_SIGNALING_PATHWAY	0.0112548023347335	0.141059229773303
BLCA	VAV1	KEGG_FC_EPSILON_RI_SIGNALING_PATHWAY	0.320105068954497	0.616688102479193
BLCA	VAV1	KEGG_FC_GAMMA_R_MEDIATED_PHAGOCYTOSIS	0.0814639791059563	0.340481219282506
BLCA	VAV1	KEGG_LEUKOCYTE_TRANSENDOTHELIAL_MIGRATION	0.306681429220242	0.604057498423636
BLCA	VAV1	KEGG_REGULATION_OF_ACTIN_CYTOSKELETON	0.404218801632069	0.684667984981034
BLCA	ABCC4	KEGG_ABC_TRANSPORTERS	0.824843764059167	0.929870454513906
BLCA	RBL1	KEGG_CELL_CYCLE	0.0671957941095684	0.31288214424752
BLCA	RBL1	KEGG_TGF_BETA_SIGNALING_PATHWAY	0.298496573713752	0.597541854364478
BLCA	TREH	KEGG_STARCH_AND_SUCROSE_METABOLISM	0.809718540825234	0.922375750881737
BLCA	ABCA5	KEGG_ABC_TRANSPORTERS	0.320884947697102	0.617512933905222
BLCA	TXK	KEGG_LEUKOCYTE_TRANSENDOTHELIAL_MIGRATION	0.0237937319577679	0.192411193826801
BLCA	EXOC3	KEGG_TIGHT_JUNCTION	0.802110023199753	0.918807546934984
BLCA	TYR	KEGG_TYROSINE_METABOLISM	0.78121770782814	0.910105165151979
BLCA	TYR	KEGG_RIBOFLAVIN_METABOLISM	0.768630770163179	0.902521885512078
BLCA	TYR	KEGG_MELANOGENESIS	0.964608306860651	0.989132246865583
BLCA	PIWIL1	KEGG_DORSO_VENTRAL_AXIS_FORMATION	0.665386575703978	0.850812934320508
BLCA	RASGRF1	KEGG_MAPK_SIGNALING_PATHWAY	0.385268853054944	0.670934617766792
BLCA	RASGRF1	KEGG_FOCAL_ADHESION	0.279023487915493	0.580852322272454
BLCA	NCAM2	KEGG_CELL_ADHESION_MOLECULES_CAMS	0.250188754425753	0.553396520452901
BLCA	MGAM	KEGG_GALACTOSE_METABOLISM	0.0856730022335881	0.346975659046032
BLCA	MGAM	KEGG_STARCH_AND_SUCROSE_METABOLISM	0.0325123036629626	0.226316113778904
BLCA	ATP6V1B1	KEGG_OXIDATIVE_PHOSPHORYLATION	0.790732556080166	0.914006446599165
BLCA	GRIK3	KEGG_NEUROACTIVE_LIGAND_RECEPTOR_INTERACTION	0.526894447600981	0.771383073728295
BLCA	FH	KEGG_CITRATE_CYCLE_TCA_CYCLE	0.00427693913544706	0.0867873301584195
BLCA	MSH2	KEGG_MISMATCH_REPAIR	0.15271911556705	0.446660175007831
BLCA	AZI2	KEGG_RIG_I_LIKE_RECEPTOR_SIGNALING_PATHWAY	0.894446670574913	0.958707672642082
BLCA	SI	KEGG_STARCH_AND_SUCROSE_METABOLISM	0.324874823462428	0.619956803885369
BLCA	PRKCI	KEGG_ENDOCYTOSIS	0.112389360530567	0.388546074977103
BLCA	PRKCI	KEGG_TIGHT_JUNCTION	0.00805531951504108	0.121836707664996
BLCA	PRKCI	KEGG_INSULIN_SIGNALING_PATHWAY	0.230044183658906	0.534246769284264
BLCA	NPFFR2	KEGG_NEUROACTIVE_LIGAND_RECEPTOR_INTERACTION	0.64061714334703	0.836712236399819
BLCA	ITGA1	KEGG_FOCAL_ADHESION	0.631911176756598	0.832888843920309
BLCA	ITGA1	KEGG_ECM_RECEPTOR_INTERACTION	0.447151059734934	0.714348416701237
BLCA	ITGA1	KEGG_HEMATOPOIETIC_CELL_LINEAGE	0.149636981329303	0.443199166118308
BLCA	ITGA1	KEGG_REGULATION_OF_ACTIN_CYTOSKELETON	0.530656497930892	0.773492613953104
BLCA	IQGAP2	KEGG_REGULATION_OF_ACTIN_CYTOSKELETON	0.407241182820932	0.686510291164079
BLCA	ABCB5	KEGG_ABC_TRANSPORTERS	0.792324183833653	0.914412169256348
BLCA	FLNC	KEGG_MAPK_SIGNALING_PATHWAY	0.898819297266073	0.960469033985391
BLCA	FLNC	KEGG_FOCAL_ADHESION	0.492048920500755	0.744798682598903
BLCA	TGFBR1	KEGG_MAPK_SIGNALING_PATHWAY	0.292078978581279	0.592016071522204
BLCA	TGFBR1	KEGG_CYTOKINE_CYTOKINE_RECEPTOR_INTERACTION	0.00342964095463034	0.0783541048865547
BLCA	TGFBR1	KEGG_TGF_BETA_SIGNALING_PATHWAY	0.258664552565406	0.560630535093663
BLCA	TGFBR1	KEGG_ADHERENS_JUNCTION	0.452179204024635	0.718353130830056
BLCA	EEA1	KEGG_ENDOCYTOSIS	0.875047780108341	0.952821163519814
BLCA	CYP46A1	KEGG_PRIMARY_BILE_ACID_BIOSYNTHESIS	0.513388526358685	0.75973440236169
BLCA	CDH1	KEGG_CELL_ADHESION_MOLECULES_CAMS	0.275461840977909	0.577992186560583
BLCA	CDH1	KEGG_ADHERENS_JUNCTION	0.751299634496814	0.893627150206708
BLCA	EIF4A3	KEGG_SPLICEOSOME	0.795266539767967	0.914510082157832
BLCA	SEMA6B	KEGG_AXON_GUIDANCE	0.464049206291449	0.724688698352851
BLCA	PIK3R1	KEGG_ERBB_SIGNALING_PATHWAY	0.814393666192711	0.924684003979931
BLCA	PIK3R1	KEGG_CHEMOKINE_SIGNALING_PATHWAY	0.935864800048468	0.977113018647261
BLCA	PIK3R1	KEGG_PHOSPHATIDYLINOSITOL_SIGNALING_SYSTEM	0.04507080391955	0.260344593534297
BLCA	PIK3R1	KEGG_MTOR_SIGNALING_PATHWAY	0.0388558297779877	0.244904172124796
BLCA	PIK3R1	KEGG_APOPTOSIS	0.249429508521876	0.552215634294761
BLCA	PIK3R1	KEGG_VEGF_SIGNALING_PATHWAY	0.0359748121552695	0.236851285078883
BLCA	PIK3R1	KEGG_FOCAL_ADHESION	0.664713647707567	0.850812934320508
BLCA	PIK3R1	KEGG_TOLL_LIKE_RECEPTOR_SIGNALING_PATHWAY	0.902696187983968	0.961908952121216
BLCA	PIK3R1	KEGG_JAK_STAT_SIGNALING_PATHWAY	0.0049679480272504	0.093747157951174
BLCA	PIK3R1	KEGG_NATURAL_KILLER_CELL_MEDIATED_CYTOTOXICITY	0.202021350845023	0.503025139372157
BLCA	PIK3R1	KEGG_T_CELL_RECEPTOR_SIGNALING_PATHWAY	0.404559436755436	0.684816414445601
BLCA	PIK3R1	KEGG_B_CELL_RECEPTOR_SIGNALING_PATHWAY	0.799954856517994	0.917644844186898
BLCA	PIK3R1	KEGG_FC_EPSILON_RI_SIGNALING_PATHWAY	0.388211930981012	0.672832031042422
BLCA	PIK3R1	KEGG_FC_GAMMA_R_MEDIATED_PHAGOCYTOSIS	0.00472229115800649	0.0914633773759347
BLCA	PIK3R1	KEGG_LEUKOCYTE_TRANSENDOTHELIAL_MIGRATION	0.560907991348919	0.793856927539459
BLCA	PIK3R1	KEGG_NEUROTROPHIN_SIGNALING_PATHWAY	0.0719649192165584	0.322856728240787
BLCA	PIK3R1	KEGG_REGULATION_OF_ACTIN_CYTOSKELETON	0.392942822251831	0.676485614068188
BLCA	PIK3R1	KEGG_INSULIN_SIGNALING_PATHWAY	0.329164183929857	0.624011250811708
BLCA	PIK3R1	KEGG_PROGESTERONE_MEDIATED_OOCYTE_MATURATION	0.505732302757618	0.754464168421015
BLCA	PIK3R1	KEGG_ALDOSTERONE_REGULATED_SODIUM_REABSORPTION	0.177717122460973	0.474477122647779
BLCA	LIPC	KEGG_GLYCEROLIPID_METABOLISM	0.898334418421002	0.960375896724294
BLCA	BMPR2	KEGG_CYTOKINE_CYTOKINE_RECEPTOR_INTERACTION	0.0675157622694313	0.313428067739058
BLCA	BMPR2	KEGG_TGF_BETA_SIGNALING_PATHWAY	0.308538933627424	0.60561581949655
BLCA	LAMA1	KEGG_FOCAL_ADHESION	0.82197305374955	0.928829192532011
BLCA	LAMA1	KEGG_ECM_RECEPTOR_INTERACTION	0.918399141547222	0.969542221704473
BLCA	NOTCH1	KEGG_DORSO_VENTRAL_AXIS_FORMATION	0.0889910548469109	0.352780598136314
BLCA	NOTCH1	KEGG_NOTCH_SIGNALING_PATHWAY	0.0217708656062921	0.186344221218869
BLCA	DNA2	KEGG_DNA_REPLICATION	0.230515629045544	0.534246769284264
BLCA	ABCD2	KEGG_ABC_TRANSPORTERS	0.168939331162788	0.467011956137446
BLCA	ABCD2	KEGG_PEROXISOME	0.604127261741911	0.817373176743853
BLCA	MAN2A1	KEGG_N_GLYCAN_BIOSYNTHESIS	0.584011636291203	0.805453096056048
BLCA	DOCK2	KEGG_CHEMOKINE_SIGNALING_PATHWAY	0.0392876874961062	0.245461115139159
BLCA	DOCK2	KEGG_FC_GAMMA_R_MEDIATED_PHAGOCYTOSIS	0.017332487164073	0.16606736340526
BLCA	CDKN1B	KEGG_ERBB_SIGNALING_PATHWAY	0.0129916653485952	0.146864258456265
BLCA	CDKN1B	KEGG_CELL_CYCLE	0.188831601310922	0.487019488217935
BLCA	PHKA1	KEGG_CALCIUM_SIGNALING_PATHWAY	0.00597906138750885	0.102448917235969
BLCA	PHKA1	KEGG_INSULIN_SIGNALING_PATHWAY	0.0903064122841252	0.353804158823045
BLCA	MYH7	KEGG_TIGHT_JUNCTION	0.659205608053854	0.847105567659083
BLCA	ARHGEF12	KEGG_AXON_GUIDANCE	0.214774539882136	0.517073265876889
BLCA	ARHGEF12	KEGG_REGULATION_OF_ACTIN_CYTOSKELETON	0.0484337405655158	0.268191576995831
BLCA	LDLR	KEGG_ENDOCYTOSIS	0.716126289848301	0.87537462793754
BLCA	ITGAL	KEGG_CELL_ADHESION_MOLECULES_CAMS	0.61761783649324	0.824471862635555
BLCA	ITGAL	KEGG_NATURAL_KILLER_CELL_MEDIATED_CYTOTOXICITY	0.0322858348549198	0.225965771283832
BLCA	ITGAL	KEGG_LEUKOCYTE_TRANSENDOTHELIAL_MIGRATION	0.791938446585106	0.914412169256348
BLCA	ITGAL	KEGG_REGULATION_OF_ACTIN_CYTOSKELETON	0.290122695007504	0.591637149106373
BLCA	NPY1R	KEGG_NEUROACTIVE_LIGAND_RECEPTOR_INTERACTION	0.182955038268312	0.480677452046025
BLCA	ITGB4	KEGG_FOCAL_ADHESION	0.117699022366114	0.397507966302648
BLCA	ITGB4	KEGG_ECM_RECEPTOR_INTERACTION	0.487989825782698	0.742092828936575
BLCA	ITGB4	KEGG_REGULATION_OF_ACTIN_CYTOSKELETON	0.140892576713909	0.430451416575132
BLCA	NDST4	KEGG_GLYCOSAMINOGLYCAN_BIOSYNTHESIS_HEPARAN_SULFATE	0.719799559871634	0.877415484214129
BLCA	ITGA8	KEGG_FOCAL_ADHESION	0.395114346026711	0.678674326219382
BLCA	ITGA8	KEGG_ECM_RECEPTOR_INTERACTION	0.456355683611317	0.720403077300569
BLCA	ITGA8	KEGG_CELL_ADHESION_MOLECULES_CAMS	0.314983972410908	0.61180299516435
BLCA	ITGA8	KEGG_REGULATION_OF_ACTIN_CYTOSKELETON	0.0444187229091852	0.25896362044236
BLCA	GLDC	KEGG_GLYCINE_SERINE_AND_THREONINE_METABOLISM	0.0504890053004955	0.273696206277741
BLCA	GRIA4	KEGG_NEUROACTIVE_LIGAND_RECEPTOR_INTERACTION	0.347120158344363	0.639978305480267
BLCA	FER	KEGG_ADHERENS_JUNCTION	0.254260094889293	0.557495120807598
BLCA	SMC1A	KEGG_CELL_CYCLE	0.203879149597499	0.505750327817031
BLCA	SMC1A	KEGG_OOCYTE_MEIOSIS	0.500877931615303	0.750479872476538
BLCA	SYMPK	KEGG_TIGHT_JUNCTION	0.385883372270385	0.671095254128618
BLCA	GRM5	KEGG_CALCIUM_SIGNALING_PATHWAY	0.352477826662916	0.645379896065087
BLCA	GRM5	KEGG_NEUROACTIVE_LIGAND_RECEPTOR_INTERACTION	0.00123064411601279	0.0422607182330434
BLCA	GRM5	KEGG_GAP_JUNCTION	0.0320742392075716	0.225509051989533
BLCA	GRM5	KEGG_LONG_TERM_POTENTIATION	0.456498506481804	0.720403077300569
BLCA	ABCA9	KEGG_ABC_TRANSPORTERS	0.562009314622141	0.794441624595017
BLCA	ITGA4	KEGG_FOCAL_ADHESION	0.221824483933165	0.525399170379157
BLCA	ITGA4	KEGG_ECM_RECEPTOR_INTERACTION	0.654015283951118	0.844199104175544
BLCA	ITGA4	KEGG_CELL_ADHESION_MOLECULES_CAMS	0.11678907853614	0.396302843099046
BLCA	ITGA4	KEGG_HEMATOPOIETIC_CELL_LINEAGE	0.28696792504672	0.587789474061213
BLCA	ITGA4	KEGG_LEUKOCYTE_TRANSENDOTHELIAL_MIGRATION	0.414648444089797	0.690349979964862
BLCA	ITGA4	KEGG_INTESTINAL_IMMUNE_NETWORK_FOR_IGA_PRODUCTION	0.0985796199526909	0.365561428360319
BLCA	ITGA4	KEGG_REGULATION_OF_ACTIN_CYTOSKELETON	0.185047483382063	0.482945600457258
BLCA	TNC	KEGG_FOCAL_ADHESION	0.888679616191625	0.957347649845473
BLCA	TNC	KEGG_ECM_RECEPTOR_INTERACTION	0.177853216187073	0.47453179192464
BLCA	RAPGEF2	KEGG_MAPK_SIGNALING_PATHWAY	0.50427787839932	0.753548301115973
BLCA	GNB4	KEGG_CHEMOKINE_SIGNALING_PATHWAY	0.738261566160197	0.886698528956137
BLCA	HSPG2	KEGG_ECM_RECEPTOR_INTERACTION	0.226716710958297	0.530829069302979
BLCA	LAMA4	KEGG_FOCAL_ADHESION	0.663892042686785	0.850340552845423
BLCA	LAMA4	KEGG_ECM_RECEPTOR_INTERACTION	0.26826070324655	0.570949653098683
BLCA	SMC1B	KEGG_CELL_CYCLE	0.590948612422275	0.809898935456334
BLCA	SMC1B	KEGG_OOCYTE_MEIOSIS	0.897128157160363	0.960012345051722
BLCA	POLR3A	KEGG_PURINE_METABOLISM	0.195541891667902	0.494689900760169
BLCA	POLR3A	KEGG_PYRIMIDINE_METABOLISM	0.755890872377881	0.895491510392029
BLCA	POLR3A	KEGG_RNA_POLYMERASE	0.0915829365607093	0.354703569927432
BLCA	POLR3A	KEGG_CYTOSOLIC_DNA_SENSING_PATHWAY	0.0245845016670638	0.195737368674973
BLCA	SUV420H1	KEGG_LYSINE_DEGRADATION	0.0221582590443051	0.186755997921006
BLCA	DDX3X	KEGG_RIG_I_LIKE_RECEPTOR_SIGNALING_PATHWAY	0.637105123990614	0.834927097904135
BLCA	MLH1	KEGG_MISMATCH_REPAIR	0.161361156703603	0.457597340787725
BLCA	PPAT	KEGG_PURINE_METABOLISM	0.989191516808093	0.99743477944816
BLCA	PPAT	KEGG_ALANINE_ASPARTATE_AND_GLUTAMATE_METABOLISM	0.611017042240313	0.821646500705523
BLCA	STK4	KEGG_MAPK_SIGNALING_PATHWAY	0.297512937478383	0.596059750659369
BLCA	CANX	KEGG_ANTIGEN_PROCESSING_AND_PRESENTATION	0.738012852041309	0.886698528956137
BLCA	S1PR1	KEGG_NEUROACTIVE_LIGAND_RECEPTOR_INTERACTION	0.58206205816052	0.803944508459873
BLCA	IARS	KEGG_VALINE_LEUCINE_AND_ISOLEUCINE_BIOSYNTHESIS	0.573564550063816	0.798754459707199
BLCA	IARS	KEGG_AMINOACYL_TRNA_BIOSYNTHESIS	0.581980398635634	0.803944508459873
BLCA	CARS2	KEGG_AMINOACYL_TRNA_BIOSYNTHESIS	0.672580175914519	0.855088755424788
BLCA	SSH3	KEGG_REGULATION_OF_ACTIN_CYTOSKELETON	0.260632640138726	0.56253259326132
BLCA	SF3B3	KEGG_SPLICEOSOME	0.761898101019815	0.898599673657666
BLCA	RXRG	KEGG_PPAR_SIGNALING_PATHWAY	0.105031852241261	0.377388824799631
BLCA	RXRG	KEGG_ADIPOCYTOKINE_SIGNALING_PATHWAY	0.217950908916548	0.520754963015867
BLCA	ADAM17	KEGG_NOTCH_SIGNALING_PATHWAY	0.734556671552566	0.884926255131327
BLCA	PPP1R3A	KEGG_INSULIN_SIGNALING_PATHWAY	0.688667233427392	0.860490768945991
BLCA	RBL2	KEGG_CELL_CYCLE	0.0776001287863253	0.332848517389398
BLCA	RBL2	KEGG_TGF_BETA_SIGNALING_PATHWAY	0.316713419893177	0.613278992237678
BLCA	XRN1	KEGG_RNA_DEGRADATION	0.211082582265458	0.513352657501537
BLCA	MYO10	KEGG_FC_GAMMA_R_MEDIATED_PHAGOCYTOSIS	0.616206059279536	0.824261399265112
BLCA	GUCY1A3	KEGG_PURINE_METABOLISM	0.0784319615462311	0.334917214426528
BLCA	GUCY1A3	KEGG_GAP_JUNCTION	0.142443200189012	0.432614825490478
BLCA	PHKB	KEGG_CALCIUM_SIGNALING_PATHWAY	0.301484876957191	0.60057993476777
BLCA	PHKB	KEGG_INSULIN_SIGNALING_PATHWAY	0.444402174989932	0.712448095568485
BLCA	PDE11A	KEGG_PURINE_METABOLISM	0.886493602387778	0.956428683377817
BLCA	F8	KEGG_COMPLEMENT_AND_COAGULATION_CASCADES	0.443089771693323	0.711384299545912
BLCA	COL6A6	KEGG_FOCAL_ADHESION	0.910803379916471	0.964748636252912
BLCA	COL6A6	KEGG_ECM_RECEPTOR_INTERACTION	0.00287648753388475	0.0708353123608152
BLCA	CFTR	KEGG_ABC_TRANSPORTERS	0.828817178967517	0.931312295339777
BLCA	DGKH	KEGG_GLYCEROLIPID_METABOLISM	0.0905146381058801	0.354003977683851
BLCA	DGKH	KEGG_GLYCEROPHOSPHOLIPID_METABOLISM	0.811655245414381	0.92307183340756
BLCA	DGKH	KEGG_PHOSPHATIDYLINOSITOL_SIGNALING_SYSTEM	0.0914574897922175	0.354703569927432
BLCA	TNN	KEGG_FOCAL_ADHESION	0.720379424891694	0.877589490550654
BLCA	TNN	KEGG_ECM_RECEPTOR_INTERACTION	0.429743376049957	0.701912111792175
BLCA	F5	KEGG_COMPLEMENT_AND_COAGULATION_CASCADES	0.336628436840889	0.629552121139148
BLCA	EHD4	KEGG_ENDOCYTOSIS	0.139104681682135	0.427119356255202
BLCA	TBL1XR1	KEGG_WNT_SIGNALING_PATHWAY	0.0957397524697537	0.362015939026256
BLCA	DHX15	KEGG_SPLICEOSOME	0.832951316774439	0.933320664880105
BLCA	CD5	KEGG_HEMATOPOIETIC_CELL_LINEAGE	0.112457675654812	0.388637281897713
BLCA	PIK3CG	KEGG_INOSITOL_PHOSPHATE_METABOLISM	0.0127063242809847	0.145501450990923
BLCA	PIK3CG	KEGG_ERBB_SIGNALING_PATHWAY	0.529135360166475	0.772696118387954
BLCA	PIK3CG	KEGG_CHEMOKINE_SIGNALING_PATHWAY	0.832303326948509	0.933026954230204
BLCA	PIK3CG	KEGG_PHOSPHATIDYLINOSITOL_SIGNALING_SYSTEM	0.018596623502056	0.173242261678245
BLCA	PIK3CG	KEGG_MTOR_SIGNALING_PATHWAY	0.114950573399946	0.392467773295699
BLCA	PIK3CG	KEGG_APOPTOSIS	0.00853677427948568	0.123950084833182
BLCA	PIK3CG	KEGG_VEGF_SIGNALING_PATHWAY	0.377227444729769	0.664245488375198
BLCA	PIK3CG	KEGG_FOCAL_ADHESION	0.788324660562934	0.913282505694718
BLCA	PIK3CG	KEGG_TOLL_LIKE_RECEPTOR_SIGNALING_PATHWAY	0.7082496513049	0.872383414910057
BLCA	PIK3CG	KEGG_JAK_STAT_SIGNALING_PATHWAY	0.00104293235573309	0.0378584445131112
BLCA	PIK3CG	KEGG_NATURAL_KILLER_CELL_MEDIATED_CYTOTOXICITY	0.0047585800122695	0.0918087454729397
BLCA	PIK3CG	KEGG_T_CELL_RECEPTOR_SIGNALING_PATHWAY	0.322591882854349	0.618781739251969
BLCA	PIK3CG	KEGG_B_CELL_RECEPTOR_SIGNALING_PATHWAY	0.0628829299596997	0.30405308166503
BLCA	PIK3CG	KEGG_FC_EPSILON_RI_SIGNALING_PATHWAY	0.875526375848895	0.952929820581283
BLCA	PIK3CG	KEGG_FC_GAMMA_R_MEDIATED_PHAGOCYTOSIS	0.0394345856230537	0.245707802728258
BLCA	PIK3CG	KEGG_LEUKOCYTE_TRANSENDOTHELIAL_MIGRATION	0.792726233293462	0.914412169256348
BLCA	PIK3CG	KEGG_NEUROTROPHIN_SIGNALING_PATHWAY	0.306681982670749	0.604057498423636
BLCA	PIK3CG	KEGG_REGULATION_OF_ACTIN_CYTOSKELETON	0.13611841220598	0.423879868865948
BLCA	PIK3CG	KEGG_INSULIN_SIGNALING_PATHWAY	0.356422934897976	0.64750717051623
BLCA	PIK3CG	KEGG_PROGESTERONE_MEDIATED_OOCYTE_MATURATION	0.870381573220342	0.951545989864202
BLCA	PIK3CG	KEGG_ALDOSTERONE_REGULATED_SODIUM_REABSORPTION	0.137464314194312	0.425146021905475
BLCA	PTPRC	KEGG_CELL_ADHESION_MOLECULES_CAMS	0.216522701770159	0.519343626402305
BLCA	PTPRC	KEGG_T_CELL_RECEPTOR_SIGNALING_PATHWAY	0.730010627511315	0.882006183461341
BLCA	PTPRC	KEGG_FC_GAMMA_R_MEDIATED_PHAGOCYTOSIS	0.814205298115657	0.9245772363378
BLCA	MYH15	KEGG_TIGHT_JUNCTION	0.301470646241162	0.60057993476777
BLCA	POLE	KEGG_PURINE_METABOLISM	0.0472158247290407	0.265005833497286
BLCA	POLE	KEGG_PYRIMIDINE_METABOLISM	0.672992634784862	0.855309109334431
BLCA	POLE	KEGG_DNA_REPLICATION	0.362871627609262	0.65268930294823
BLCA	POLE	KEGG_BASE_EXCISION_REPAIR	0.122347678756298	0.406071655770564
BLCA	POLE	KEGG_NUCLEOTIDE_EXCISION_REPAIR	0.994472120557018	0.998705990410052
BLCA	LIPE	KEGG_INSULIN_SIGNALING_PATHWAY	0.64061714334703	0.836712236399819
BLCA	AOX1	KEGG_VALINE_LEUCINE_AND_ISOLEUCINE_DEGRADATION	0.105629047941316	0.378388267131885
BLCA	AOX1	KEGG_TYROSINE_METABOLISM	0.778554024075217	0.907649338641751
BLCA	AOX1	KEGG_TRYPTOPHAN_METABOLISM	0.598271866447496	0.814486578791864
BLCA	AOX1	KEGG_NICOTINATE_AND_NICOTINAMIDE_METABOLISM	0.071285942534806	0.321821060701812
BLCA	AOX1	KEGG_DRUG_METABOLISM_CYTOCHROME_P450	0.0824653362640447	0.341931443343986
BLCA	FPGT	KEGG_FRUCTOSE_AND_MANNOSE_METABOLISM	0.6781229508047	0.85647977330372
BLCA	FPGT	KEGG_AMINO_SUGAR_AND_NUCLEOTIDE_SUGAR_METABOLISM	0.802586762187867	0.918835750052947
BLCA	AASDH	KEGG_LYSINE_DEGRADATION	0.963477457330073	0.98848974764912
BLCA	DOT1L	KEGG_LYSINE_DEGRADATION	0.575263018754985	0.799851446562294
BLCA	MCM4	KEGG_DNA_REPLICATION	0.402791904140478	0.683538076550699
BLCA	MCM4	KEGG_CELL_CYCLE	0.527719537762692	0.771794393381522
BLCA	CARD11	KEGG_T_CELL_RECEPTOR_SIGNALING_PATHWAY	0.995086933873937	0.998705990410052
BLCA	CARD11	KEGG_B_CELL_RECEPTOR_SIGNALING_PATHWAY	0.262943296625963	0.565279063441777
BLCA	INADL	KEGG_TIGHT_JUNCTION	0.047791273744574	0.266203976806561
BLCA	ITGAV	KEGG_FOCAL_ADHESION	0.1868211518401	0.485042148128429
BLCA	ITGAV	KEGG_ECM_RECEPTOR_INTERACTION	0.94837732025864	0.981485036657261
BLCA	ITGAV	KEGG_CELL_ADHESION_MOLECULES_CAMS	0.219042566792339	0.522106944969804
BLCA	ITGAV	KEGG_REGULATION_OF_ACTIN_CYTOSKELETON	0.164649801957266	0.460934792625868
BLCA	IL10RA	KEGG_CYTOKINE_CYTOKINE_RECEPTOR_INTERACTION	0.147194711323405	0.439565924948413
BLCA	IL10RA	KEGG_JAK_STAT_SIGNALING_PATHWAY	0.889321358551333	0.95755467659973
BLCA	DPYD	KEGG_PYRIMIDINE_METABOLISM	0.0396495615439664	0.246108519754537
BLCA	DPYD	KEGG_BETA_ALANINE_METABOLISM	0.711576188971156	0.872642420934222
BLCA	DPYD	KEGG_PANTOTHENATE_AND_COA_BIOSYNTHESIS	0.546485550916746	0.784540501584694
BLCA	DPYD	KEGG_DRUG_METABOLISM_OTHER_ENZYMES	0.0102016750577396	0.135667051887253
BLCA	CACNA1H	KEGG_MAPK_SIGNALING_PATHWAY	0.115226918199573	0.392620963121593
BLCA	CACNA1H	KEGG_CALCIUM_SIGNALING_PATHWAY	0.012813042251446	0.14568518225803
BLCA	HK2	KEGG_GLYCOLYSIS_GLUCONEOGENESIS	0.127603614592713	0.412500780626073
BLCA	HK2	KEGG_FRUCTOSE_AND_MANNOSE_METABOLISM	0.282857625503307	0.583422797189253
BLCA	HK2	KEGG_GALACTOSE_METABOLISM	0.669224009155563	0.852490838800841
BLCA	HK2	KEGG_STARCH_AND_SUCROSE_METABOLISM	0.00263917606467601	0.0664950247040863
BLCA	HK2	KEGG_AMINO_SUGAR_AND_NUCLEOTIDE_SUGAR_METABOLISM	0.0140551175580191	0.151733348922682
BLCA	HK2	KEGG_INSULIN_SIGNALING_PATHWAY	0.210433729261543	0.513019858670869
BLCA	OR6Y1	KEGG_OLFACTORY_TRANSDUCTION	0.440405831119489	0.70911809774599
BLCA	OR13C3	KEGG_OLFACTORY_TRANSDUCTION	0.0573945543732175	0.290110380305263
BLCA	MYH2	KEGG_TIGHT_JUNCTION	0.125313219241337	0.409944880435362
BLCA	DUSP6	KEGG_MAPK_SIGNALING_PATHWAY	0.0918875114047036	0.355122042301853
BLCA	F13B	KEGG_COMPLEMENT_AND_COAGULATION_CASCADES	0.507599229342068	0.755501905357875
BLCA	PRKDC	KEGG_NON_HOMOLOGOUS_END_JOINING	0.456225685207636	0.720403077300569
BLCA	PRKDC	KEGG_CELL_CYCLE	0.747884895283097	0.891296189040568
BLCA	ATP6V0A2	KEGG_OXIDATIVE_PHOSPHORYLATION	0.595564457843088	0.812358542343719
BLCA	ATP6V0A2	KEGG_LYSOSOME	0.210399799170081	0.513019858670869
BLCA	PARP4	KEGG_BASE_EXCISION_REPAIR	0.824988960772797	0.929927177059711
BLCA	SERPINC1	KEGG_COMPLEMENT_AND_COAGULATION_CASCADES	0.0785376017779698	0.334917214426528
BLCA	SV2C	KEGG_ECM_RECEPTOR_INTERACTION	0.609307166231623	0.820417576073106
BLCA	KEAP1	KEGG_UBIQUITIN_MEDIATED_PROTEOLYSIS	0.658296889004619	0.846492759004759
BLCA	PLXNA1	KEGG_AXON_GUIDANCE	0.686982603290601	0.859478049164566
BLCA	CNTNAP2	KEGG_CELL_ADHESION_MOLECULES_CAMS	0.0341922229782183	0.231213367424685
BLCA	OSMR	KEGG_CYTOKINE_CYTOKINE_RECEPTOR_INTERACTION	0.419866606310194	0.694885614394835
BLCA	OSMR	KEGG_JAK_STAT_SIGNALING_PATHWAY	0.781707593604639	0.910243089572965
BLCA	AASS	KEGG_LYSINE_DEGRADATION	0.799860530860615	0.917644043423257
BLCA	SLIT1	KEGG_AXON_GUIDANCE	0.125229529111658	0.409944880435362
BLCA	HCK	KEGG_CHEMOKINE_SIGNALING_PATHWAY	0.171239858839453	0.468410105860696
BLCA	HCK	KEGG_FC_GAMMA_R_MEDIATED_PHAGOCYTOSIS	0.81021512745236	0.922375750881737
BLCA	PARD6A	KEGG_ENDOCYTOSIS	0.679926940491828	0.85710147186629
BLCA	PARD6A	KEGG_TIGHT_JUNCTION	0.137158094651871	0.424466841074515
BLCA	SLK	KEGG_OOCYTE_MEIOSIS	0.409052148527911	0.687463296804941
BLCA	NRP1	KEGG_AXON_GUIDANCE	0.790732556080166	0.914006446599165
BLCA	PDE5A	KEGG_PURINE_METABOLISM	0.882798999078317	0.954678262160414
BLCA	MAGI3	KEGG_TIGHT_JUNCTION	0.368506862142249	0.656433817156466
BLCA	ABCB6	KEGG_ABC_TRANSPORTERS	0.409812358746859	0.687491030333882
BLCA	EPHA6	KEGG_AXON_GUIDANCE	0.821164900286596	0.928509398727339
BLCA	PSD	KEGG_ENDOCYTOSIS	0.612752322953969	0.822021134676895
BLCA	DDX23	KEGG_SPLICEOSOME	0.43930596893884	0.708047656893532
BLCA	DNTT	KEGG_NON_HOMOLOGOUS_END_JOINING	0.0225322049862538	0.187072815726328
BLCA	DNTT	KEGG_HEMATOPOIETIC_CELL_LINEAGE	0.254243381868082	0.557495120807598
BLCA	CHPT1	KEGG_GLYCEROPHOSPHOLIPID_METABOLISM	0.291232401808578	0.591899311646858
BLCA	CHPT1	KEGG_ETHER_LIPID_METABOLISM	0.983296689841867	0.995894726970719
BLCA	SF3B1	KEGG_SPLICEOSOME	0.611745530797832	0.821680149219804
BLCA	ITPR3	KEGG_CALCIUM_SIGNALING_PATHWAY	0.676943651627806	0.856027473338872
BLCA	ITPR3	KEGG_PHOSPHATIDYLINOSITOL_SIGNALING_SYSTEM	0.0104112750687761	0.136784057572486
BLCA	ITPR3	KEGG_OOCYTE_MEIOSIS	0.0974416675490897	0.364082371258747
BLCA	ITPR3	KEGG_GAP_JUNCTION	0.951655921030298	0.983423148880013
BLCA	ITPR3	KEGG_LONG_TERM_POTENTIATION	0.429369163145886	0.701912111792175
BLCA	ITPR3	KEGG_TASTE_TRANSDUCTION	0.00957627109740994	0.130902417051206
BLCA	ITPR3	KEGG_GNRH_SIGNALING_PATHWAY	0.292560796701867	0.592456534949785
BLCA	GRID1	KEGG_NEUROACTIVE_LIGAND_RECEPTOR_INTERACTION	0.349642723753645	0.642574223797014
BLCA	HTR1A	KEGG_NEUROACTIVE_LIGAND_RECEPTOR_INTERACTION	0.0659728977821877	0.310120082092672
BLCA	PAPOLB	KEGG_RNA_DEGRADATION	0.149918098096968	0.443777493037869
BLCA	DHX8	KEGG_SPLICEOSOME	0.526894447600981	0.771383073728295
BLCA	GGA2	KEGG_LYSOSOME	0.266749813045102	0.569093364748595
BLCA	ERCC2	KEGG_NUCLEOTIDE_EXCISION_REPAIR	0.92669108007443	0.972342537906691
BLCA	RAD54L	KEGG_HOMOLOGOUS_RECOMBINATION	0.110249908448426	0.384814584295948
BLCA	ADCY8	KEGG_PURINE_METABOLISM	0.166040068660651	0.463203255601075
BLCA	ADCY8	KEGG_CALCIUM_SIGNALING_PATHWAY	0.0291194942800899	0.215721967830054
BLCA	ADCY8	KEGG_CHEMOKINE_SIGNALING_PATHWAY	0.0403246004694166	0.247944687865593
BLCA	ADCY8	KEGG_OOCYTE_MEIOSIS	0.0429291984437123	0.255502007200631
BLCA	ADCY8	KEGG_GAP_JUNCTION	0.424227112180731	0.69809434628666
BLCA	ADCY8	KEGG_LONG_TERM_POTENTIATION	0.342879147271296	0.635410100554972
BLCA	ADCY8	KEGG_TASTE_TRANSDUCTION	4.95457877062246e-05	0.00352773302734546
BLCA	ADCY8	KEGG_GNRH_SIGNALING_PATHWAY	0.636515474637729	0.834617823171232
BLCA	ADCY8	KEGG_PROGESTERONE_MEDIATED_OOCYTE_MATURATION	0.421379643237101	0.695744926443199
BLCA	ADCY8	KEGG_MELANOGENESIS	0.970419592313387	0.990330896532262
BLCA	ZFYVE9	KEGG_TGF_BETA_SIGNALING_PATHWAY	0.869693927938144	0.951040834599954
BLCA	PDE3B	KEGG_PURINE_METABOLISM	0.727124569366186	0.880964659239904
BLCA	PDE3B	KEGG_INSULIN_SIGNALING_PATHWAY	0.778551196471976	0.907649338641751
BLCA	PDE3B	KEGG_PROGESTERONE_MEDIATED_OOCYTE_MATURATION	0.0611254664255462	0.300187742811254
BLCA	ACSS3	KEGG_PROPANOATE_METABOLISM	0.752277504393951	0.894030777320858
BLCA	ATP2B4	KEGG_CALCIUM_SIGNALING_PATHWAY	0.699779881727921	0.866305749755634
BLCA	EPHB3	KEGG_AXON_GUIDANCE	0.605870650785368	0.818601909063605
BLCA	SLU7	KEGG_SPLICEOSOME	0.333009083556106	0.62609285016946
BLCA	SEMA3E	KEGG_AXON_GUIDANCE	0.464049206291449	0.724688698352851
BLCA	ADCY5	KEGG_PURINE_METABOLISM	0.083155512074792	0.343173138739193
BLCA	ADCY5	KEGG_CHEMOKINE_SIGNALING_PATHWAY	0.62381036927175	0.828682771559549
BLCA	ADCY5	KEGG_OOCYTE_MEIOSIS	0.159936857961157	0.456226188850253
BLCA	ADCY5	KEGG_GAP_JUNCTION	0.0126131509390222	0.14526614847633
BLCA	ADCY5	KEGG_GNRH_SIGNALING_PATHWAY	0.749636673163038	0.892949566561854
BLCA	ADCY5	KEGG_PROGESTERONE_MEDIATED_OOCYTE_MATURATION	0.690588390929551	0.860981742617278
BLCA	ADCY5	KEGG_MELANOGENESIS	0.0969457538023382	0.363490946066074
BLCA	ERBB2	KEGG_ERBB_SIGNALING_PATHWAY	0.256558950718699	0.559282534696168
BLCA	ERBB2	KEGG_CALCIUM_SIGNALING_PATHWAY	2.45243578006306e-10	5.86251782448733e-08
BLCA	ERBB2	KEGG_FOCAL_ADHESION	0.0891192240120731	0.352780598136314
BLCA	ERBB2	KEGG_ADHERENS_JUNCTION	0.00472267507470297	0.0914633773759347
BLCA	NFASC	KEGG_CELL_ADHESION_MOLECULES_CAMS	0.57869682395636	0.802235865855203
BLCA	ERBB4	KEGG_ERBB_SIGNALING_PATHWAY	0.717549922852825	0.876131405740692
BLCA	ERBB4	KEGG_CALCIUM_SIGNALING_PATHWAY	0.00929063882402346	0.129246343712326
BLCA	ERBB4	KEGG_ENDOCYTOSIS	0.112969029146957	0.389588126203141
BLCA	EPHB1	KEGG_AXON_GUIDANCE	0.103139476131176	0.374623349148822
BLCA	FZD6	KEGG_WNT_SIGNALING_PATHWAY	0.484004870109209	0.738989663248292
BLCA	FZD6	KEGG_MELANOGENESIS	0.588000436520895	0.808074911858667
BLCA	OR5D16	KEGG_OLFACTORY_TRANSDUCTION	0.94734199343727	0.981485036657261
BLCA	DNMT3A	KEGG_CYSTEINE_AND_METHIONINE_METABOLISM	0.79831274042853	0.916619396548737
BLCA	DIAPH2	KEGG_REGULATION_OF_ACTIN_CYTOSKELETON	0.764361815836033	0.900313683092051
BLCA	RDH16	KEGG_RETINOL_METABOLISM	0.545557860396359	0.783904499302846
BLCA	STAM2	KEGG_ENDOCYTOSIS	0.18671282593427	0.484889350021669
BLCA	STAM2	KEGG_JAK_STAT_SIGNALING_PATHWAY	0.293554248707847	0.593444566999766
BLCA	GYS1	KEGG_STARCH_AND_SUCROSE_METABOLISM	0.0205304668998554	0.181605691412891
BLCA	GYS1	KEGG_INSULIN_SIGNALING_PATHWAY	0.087611618685548	0.351045804809574
BLCA	SIGLEC1	KEGG_CELL_ADHESION_MOLECULES_CAMS	0.53527696542529	0.776646859827279
BLCA	FLT4	KEGG_CYTOKINE_CYTOKINE_RECEPTOR_INTERACTION	0.02135034008664	0.184853960414451
BLCA	FLT4	KEGG_FOCAL_ADHESION	0.403037092581011	0.683538076550699
BLCA	ERCC4	KEGG_NUCLEOTIDE_EXCISION_REPAIR	0.173451822381574	0.470036092749067
BLCA	PPARG	KEGG_PPAR_SIGNALING_PATHWAY	0.105974717431569	0.378657749014512
BLCA	MEFV	KEGG_NOD_LIKE_RECEPTOR_SIGNALING_PATHWAY	0.972559419687646	0.991016454243321
BLCA	FARP2	KEGG_ADHERENS_JUNCTION	0.157799568512927	0.453015105739659
BLCA	GRIK2	KEGG_NEUROACTIVE_LIGAND_RECEPTOR_INTERACTION	0.846274501615275	0.939123232600918
BLCA	AQR	KEGG_SPLICEOSOME	0.967711091283606	0.990023367236572
BLCA	CTNNA2	KEGG_ADHERENS_JUNCTION	0.110679937828766	0.385766536124595
BLCA	CTNNA2	KEGG_TIGHT_JUNCTION	0.156102517279131	0.450120850795164
BLCA	CTNNA2	KEGG_LEUKOCYTE_TRANSENDOTHELIAL_MIGRATION	0.45445192652153	0.719314493647151
BLCA	RASGRF2	KEGG_MAPK_SIGNALING_PATHWAY	0.168840832680497	0.466932562387571
BLCA	TCIRG1	KEGG_OXIDATIVE_PHOSPHORYLATION	0.0719765280283767	0.322856728240787
BLCA	TCIRG1	KEGG_LYSOSOME	0.209504203182687	0.512057530023321
BLCA	LCMT2	KEGG_HISTIDINE_METABOLISM	0.862433894111372	0.947507521150718
BLCA	LCMT2	KEGG_TYROSINE_METABOLISM	0.817841100146212	0.926344692307064
BLCA	LCMT2	KEGG_SELENOAMINO_ACID_METABOLISM	0.957349083136028	0.986021265638526
BLCA	THBS2	KEGG_TGF_BETA_SIGNALING_PATHWAY	0.963031487692771	0.98848974764912
BLCA	THBS2	KEGG_FOCAL_ADHESION	0.567883377741752	0.795701002146616
BLCA	THBS2	KEGG_ECM_RECEPTOR_INTERACTION	0.338235682073087	0.630836901997779
BLCA	UBR5	KEGG_UBIQUITIN_MEDIATED_PROTEOLYSIS	0.709271463436858	0.872431753299858
BLCA	ATP2A2	KEGG_CALCIUM_SIGNALING_PATHWAY	0.36070846492873	0.651485137307702
BLCA	POLR1D	KEGG_PURINE_METABOLISM	0.263144510484644	0.565567279015524
BLCA	POLR1D	KEGG_PYRIMIDINE_METABOLISM	0.812376383725193	0.92367841414857
BLCA	POLR1D	KEGG_RNA_POLYMERASE	0.240698051400644	0.543817796629256
BLCA	POLR1D	KEGG_CYTOSOLIC_DNA_SENSING_PATHWAY	0.126117191691838	0.410792487793853
BLCA	FGA	KEGG_COMPLEMENT_AND_COAGULATION_CASCADES	0.824843764059167	0.929870454513906
BLCA	FZD10	KEGG_WNT_SIGNALING_PATHWAY	0.171239858839453	0.468410105860696
BLCA	FZD10	KEGG_MELANOGENESIS	0.453253334580297	0.718941646813965
BLCA	MAP3K4	KEGG_MAPK_SIGNALING_PATHWAY	0.838760992053394	0.935527737780348
BLCA	MAP3K4	KEGG_GNRH_SIGNALING_PATHWAY	0.317940661975596	0.61425054073176
BLCA	ROCK2	KEGG_CHEMOKINE_SIGNALING_PATHWAY	0.315097900934234	0.611807726954539
BLCA	ROCK2	KEGG_WNT_SIGNALING_PATHWAY	0.773631626202187	0.90470869447651
BLCA	ROCK2	KEGG_TGF_BETA_SIGNALING_PATHWAY	0.943798071235929	0.980305732957115
BLCA	ROCK2	KEGG_AXON_GUIDANCE	0.00721743739262275	0.114648466588486
BLCA	ROCK2	KEGG_FOCAL_ADHESION	0.996062622033851	0.99895219081368
BLCA	ROCK2	KEGG_LEUKOCYTE_TRANSENDOTHELIAL_MIGRATION	0.333786963222109	0.626671414569792
BLCA	ROCK2	KEGG_REGULATION_OF_ACTIN_CYTOSKELETON	0.0393385495431196	0.24546869205559
BLCA	ERBB3	KEGG_ERBB_SIGNALING_PATHWAY	0.266186748892096	0.56858218968471
BLCA	ERBB3	KEGG_CALCIUM_SIGNALING_PATHWAY	0.0219407439329226	0.186344221218869
BLCA	ERBB3	KEGG_ENDOCYTOSIS	0.00187778126445779	0.0545469455565959
BLCA	RPS6KA6	KEGG_MAPK_SIGNALING_PATHWAY	0.113689253804799	0.390266574338495
BLCA	RPS6KA6	KEGG_OOCYTE_MEIOSIS	0.506650166293516	0.754777060319616
BLCA	RPS6KA6	KEGG_MTOR_SIGNALING_PATHWAY	0.411569292579039	0.688027120407763
BLCA	RPS6KA6	KEGG_LONG_TERM_POTENTIATION	0.566237044591989	0.795481806118046
BLCA	RPS6KA6	KEGG_NEUROTROPHIN_SIGNALING_PATHWAY	0.0757485427880631	0.330254211684078
BLCA	RPS6KA6	KEGG_PROGESTERONE_MEDIATED_OOCYTE_MATURATION	0.626078728514926	0.829215894347945
BLCA	ATP6V0A4	KEGG_OXIDATIVE_PHOSPHORYLATION	0.626644831836319	0.829465335176951
BLCA	ATP6V0A4	KEGG_LYSOSOME	0.802586762187867	0.918835750052947
BLCA	LRRC4C	KEGG_AXON_GUIDANCE	0.0745512819364631	0.328808572158366
BLCA	PIK3CA	KEGG_INOSITOL_PHOSPHATE_METABOLISM	0.353771308949501	0.646234263808466
BLCA	PIK3CA	KEGG_ERBB_SIGNALING_PATHWAY	0.0320400102017025	0.225430107671849
BLCA	PIK3CA	KEGG_CHEMOKINE_SIGNALING_PATHWAY	0.0791082194131479	0.336074449767117
BLCA	PIK3CA	KEGG_PHOSPHATIDYLINOSITOL_SIGNALING_SYSTEM	0.00258950017812958	0.0656347801253609
BLCA	PIK3CA	KEGG_MTOR_SIGNALING_PATHWAY	0.546560814694449	0.784540501584694
BLCA	PIK3CA	KEGG_APOPTOSIS	0.00269061170192234	0.0674342046422023
BLCA	PIK3CA	KEGG_VEGF_SIGNALING_PATHWAY	0.0877188139445434	0.351045804809574
BLCA	PIK3CA	KEGG_FOCAL_ADHESION	0.15266153114607	0.446660175007831
BLCA	PIK3CA	KEGG_TOLL_LIKE_RECEPTOR_SIGNALING_PATHWAY	0.00294463600289216	0.0714365778820447
BLCA	PIK3CA	KEGG_JAK_STAT_SIGNALING_PATHWAY	4.82745301510411e-15	1.97141112504314e-12
BLCA	PIK3CA	KEGG_NATURAL_KILLER_CELL_MEDIATED_CYTOTOXICITY	1.02714116531571e-10	2.51675264031482e-08
BLCA	PIK3CA	KEGG_T_CELL_RECEPTOR_SIGNALING_PATHWAY	0.54069369779628	0.780922330106298
BLCA	PIK3CA	KEGG_B_CELL_RECEPTOR_SIGNALING_PATHWAY	0.000203541120771468	0.0115166887870005
BLCA	PIK3CA	KEGG_FC_EPSILON_RI_SIGNALING_PATHWAY	0.00413013585879839	0.0856765547184623
BLCA	PIK3CA	KEGG_FC_GAMMA_R_MEDIATED_PHAGOCYTOSIS	1.49710232181619e-08	2.62019640287866e-06
BLCA	PIK3CA	KEGG_LEUKOCYTE_TRANSENDOTHELIAL_MIGRATION	0.238324939798718	0.540551452360869
BLCA	PIK3CA	KEGG_NEUROTROPHIN_SIGNALING_PATHWAY	0.000293281362556584	0.0151317691998443
BLCA	PIK3CA	KEGG_REGULATION_OF_ACTIN_CYTOSKELETON	0.000204459121409865	0.0115166887870005
BLCA	PIK3CA	KEGG_INSULIN_SIGNALING_PATHWAY	0.604826966813947	0.817642634723241
BLCA	PIK3CA	KEGG_PROGESTERONE_MEDIATED_OOCYTE_MATURATION	0.233789776001088	0.536810729865095
BLCA	PIK3CA	KEGG_ALDOSTERONE_REGULATED_SODIUM_REABSORPTION	0.52756593134052	0.771794393381522
BLCA	OR13H1	KEGG_OLFACTORY_TRANSDUCTION	0.320884947697102	0.617512933905222
BLCA	MYH1	KEGG_TIGHT_JUNCTION	0.516560439792355	0.762356402711169
BLCA	EPB41L1	KEGG_TIGHT_JUNCTION	0.264639394762383	0.567616230748055
BLCA	AARS2	KEGG_AMINOACYL_TRNA_BIOSYNTHESIS	0.626618120638666	0.829465335176951
BLCA	GNA13	KEGG_REGULATION_OF_ACTIN_CYTOSKELETON	0.104043426508191	0.37531454663481
BLCA	GRIK1	KEGG_NEUROACTIVE_LIGAND_RECEPTOR_INTERACTION	0.967711091283606	0.990023367236572
BLCA	BLM	KEGG_HOMOLOGOUS_RECOMBINATION	0.0546814094140753	0.283562165961562
BLCA	VPS45	KEGG_ENDOCYTOSIS	0.208391594653413	0.511122627426952
BLCA	CTNNB1	KEGG_WNT_SIGNALING_PATHWAY	0.175830351651228	0.472368341002928
BLCA	CTNNB1	KEGG_FOCAL_ADHESION	0.0913397507753331	0.354698547510041
BLCA	CTNNB1	KEGG_ADHERENS_JUNCTION	0.199829716438306	0.500646996628793
BLCA	CTNNB1	KEGG_TIGHT_JUNCTION	0.348361897291746	0.641182151240639
BLCA	CTNNB1	KEGG_LEUKOCYTE_TRANSENDOTHELIAL_MIGRATION	0.728963155274557	0.881348348988983
BLCA	CTNNB1	KEGG_MELANOGENESIS	0.608036150318186	0.819655864828178
BLCA	SYNJ1	KEGG_INOSITOL_PHOSPHATE_METABOLISM	0.376879788565872	0.664113413832095
BLCA	SYNJ1	KEGG_PHOSPHATIDYLINOSITOL_SIGNALING_SYSTEM	0.68707382054937	0.859478049164566
BLCA	PIK3R3	KEGG_ERBB_SIGNALING_PATHWAY	0.715316866357408	0.874755632965898
BLCA	PIK3R3	KEGG_CHEMOKINE_SIGNALING_PATHWAY	0.365028089562684	0.654286815253085
BLCA	PIK3R3	KEGG_PHOSPHATIDYLINOSITOL_SIGNALING_SYSTEM	0.062029823176177	0.302766084138302
BLCA	PIK3R3	KEGG_MTOR_SIGNALING_PATHWAY	0.871842791078125	0.951657333261689
BLCA	PIK3R3	KEGG_APOPTOSIS	0.0598186483895938	0.296251931716225
BLCA	PIK3R3	KEGG_VEGF_SIGNALING_PATHWAY	0.0343115601706774	0.231762647300351
BLCA	PIK3R3	KEGG_FOCAL_ADHESION	0.261833248229083	0.563947038550906
BLCA	PIK3R3	KEGG_TOLL_LIKE_RECEPTOR_SIGNALING_PATHWAY	0.0671330016491047	0.31288214424752
BLCA	PIK3R3	KEGG_JAK_STAT_SIGNALING_PATHWAY	0.0241101697727188	0.19400966661939
BLCA	PIK3R3	KEGG_NATURAL_KILLER_CELL_MEDIATED_CYTOTOXICITY	0.0341232070873024	0.231127541577506
BLCA	PIK3R3	KEGG_T_CELL_RECEPTOR_SIGNALING_PATHWAY	0.282852982753353	0.583422797189253
BLCA	PIK3R3	KEGG_B_CELL_RECEPTOR_SIGNALING_PATHWAY	0.110869360770312	0.385766536124595
BLCA	PIK3R3	KEGG_FC_EPSILON_RI_SIGNALING_PATHWAY	0.141459479637803	0.431501245515387
BLCA	PIK3R3	KEGG_FC_GAMMA_R_MEDIATED_PHAGOCYTOSIS	0.381053638467356	0.666955815520404
BLCA	PIK3R3	KEGG_LEUKOCYTE_TRANSENDOTHELIAL_MIGRATION	0.686231588799983	0.859417266811491
BLCA	PIK3R3	KEGG_NEUROTROPHIN_SIGNALING_PATHWAY	0.40833177625458	0.687281143803345
BLCA	PIK3R3	KEGG_REGULATION_OF_ACTIN_CYTOSKELETON	0.192823732875644	0.490874131406282
BLCA	PIK3R3	KEGG_INSULIN_SIGNALING_PATHWAY	0.542125098278905	0.781607544605994
BLCA	PIK3R3	KEGG_PROGESTERONE_MEDIATED_OOCYTE_MATURATION	0.569108052665548	0.796178199785144
BLCA	PIK3R3	KEGG_ALDOSTERONE_REGULATED_SODIUM_REABSORPTION	0.0203785616155181	0.181602173426128
BLCA	NRXN3	KEGG_CELL_ADHESION_MOLECULES_CAMS	0.43428059733802	0.705477011229928
BLCA	MALT1	KEGG_T_CELL_RECEPTOR_SIGNALING_PATHWAY	0.246508970966683	0.548724602417547
BLCA	MALT1	KEGG_B_CELL_RECEPTOR_SIGNALING_PATHWAY	0.144464939959363	0.435260029677749
BLCA	NFATC1	KEGG_WNT_SIGNALING_PATHWAY	0.808634816886858	0.922150479254476
BLCA	NFATC1	KEGG_AXON_GUIDANCE	0.935439314698996	0.976903646602542
BLCA	NFATC1	KEGG_VEGF_SIGNALING_PATHWAY	0.278964518897679	0.580852322272454
BLCA	NFATC1	KEGG_NATURAL_KILLER_CELL_MEDIATED_CYTOTOXICITY	0.690307620917292	0.860981742617278
BLCA	NFATC1	KEGG_T_CELL_RECEPTOR_SIGNALING_PATHWAY	0.177306180780752	0.473896339741519
BLCA	NFATC1	KEGG_B_CELL_RECEPTOR_SIGNALING_PATHWAY	0.0118682710861846	0.143076168407989
BLCA	CNTN2	KEGG_CELL_ADHESION_MOLECULES_CAMS	0.208391594653413	0.511122627426952
BLCA	GLB1	KEGG_GALACTOSE_METABOLISM	0.976053927882937	0.992433578414948
BLCA	GLB1	KEGG_OTHER_GLYCAN_DEGRADATION	0.668021271090858	0.852066173602486
BLCA	GLB1	KEGG_GLYCOSAMINOGLYCAN_DEGRADATION	0.701248996474939	0.86724812800642
BLCA	GLB1	KEGG_SPHINGOLIPID_METABOLISM	0.979989361906947	0.994212049634237
BLCA	GLB1	KEGG_GLYCOSPHINGOLIPID_BIOSYNTHESIS_GANGLIO_SERIES	0.799726759476792	0.917644043423257
BLCA	GLB1	KEGG_LYSOSOME	0.0658817174168932	0.310120082092672
BLCA	LAMB1	KEGG_FOCAL_ADHESION	0.536134542006183	0.777545819207251
BLCA	LAMB1	KEGG_ECM_RECEPTOR_INTERACTION	0.262343288916355	0.564236685246696
BLCA	PI4KA	KEGG_INOSITOL_PHOSPHATE_METABOLISM	0.266107048810883	0.56858218968471
BLCA	PI4KA	KEGG_PHOSPHATIDYLINOSITOL_SIGNALING_SYSTEM	0.274671450312969	0.577026548091905
BLCA	STAG1	KEGG_CELL_CYCLE	0.207988401186047	0.510516984729388
BLCA	LAMA3	KEGG_FOCAL_ADHESION	0.64649750515287	0.839915435843489
BLCA	LAMA3	KEGG_ECM_RECEPTOR_INTERACTION	0.410806019499552	0.688027120407763
BLCA	PIGK	KEGG_GLYCOSYLPHOSPHATIDYLINOSITOL_GPI_ANCHOR_BIOSYNTHESIS	0.0653620009967837	0.309624442614537
BLCA	XDH	KEGG_PURINE_METABOLISM	0.526926811408115	0.771383073728295
BLCA	XDH	KEGG_DRUG_METABOLISM_OTHER_ENZYMES	0.0962907699432773	0.363118828862663
BLCA	XDH	KEGG_PEROXISOME	0.793862225071721	0.914510082157832
BLCA	DPYS	KEGG_PYRIMIDINE_METABOLISM	0.0390648233719176	0.245110690292977
BLCA	DPYS	KEGG_BETA_ALANINE_METABOLISM	0.35347628586915	0.646234263808466
BLCA	DPYS	KEGG_PANTOTHENATE_AND_COA_BIOSYNTHESIS	0.576034367080204	0.800088201278401
BLCA	DPYS	KEGG_DRUG_METABOLISM_OTHER_ENZYMES	0.251237069682218	0.554003716637266
BLCA	PRKG2	KEGG_GAP_JUNCTION	0.0398379773018896	0.246341965637741
BLCA	PRKG2	KEGG_OLFACTORY_TRANSDUCTION	0.104819171870374	0.377279729526822
BLCA	F11	KEGG_COMPLEMENT_AND_COAGULATION_CASCADES	0.0540652801749893	0.281708565122313
BLCA	GCLC	KEGG_GLUTATHIONE_METABOLISM	0.214209915675512	0.516602210515673
BLCA	VAV2	KEGG_CHEMOKINE_SIGNALING_PATHWAY	0.738399797984807	0.886698528956137
BLCA	VAV2	KEGG_FOCAL_ADHESION	0.74461560071218	0.890142885143714
BLCA	VAV2	KEGG_NATURAL_KILLER_CELL_MEDIATED_CYTOTOXICITY	0.0975792551284628	0.36418108260334
BLCA	VAV2	KEGG_T_CELL_RECEPTOR_SIGNALING_PATHWAY	0.297942545728794	0.596554625268214
BLCA	VAV2	KEGG_B_CELL_RECEPTOR_SIGNALING_PATHWAY	0.324125236067373	0.619441811551317
BLCA	VAV2	KEGG_FC_EPSILON_RI_SIGNALING_PATHWAY	0.526474157163431	0.771181170880106
BLCA	VAV2	KEGG_FC_GAMMA_R_MEDIATED_PHAGOCYTOSIS	0.230608169281597	0.534246769284264
BLCA	VAV2	KEGG_LEUKOCYTE_TRANSENDOTHELIAL_MIGRATION	0.583420005712947	0.805139323569782
BLCA	VAV2	KEGG_REGULATION_OF_ACTIN_CYTOSKELETON	0.173649447937105	0.470036092749067
BLCA	GUCY2F	KEGG_PURINE_METABOLISM	0.392525029911226	0.676171477870992
BLCA	MTHFD1	KEGG_GLYOXYLATE_AND_DICARBOXYLATE_METABOLISM	0.0453667910147232	0.261092142533941
BLCA	MTHFD1	KEGG_ONE_CARBON_POOL_BY_FOLATE	0.568542887584575	0.795806174609993
BLCA	SMAD4	KEGG_CELL_CYCLE	0.628210516469328	0.830132300379653
BLCA	SMAD4	KEGG_WNT_SIGNALING_PATHWAY	0.0909673894880428	0.354373791677127
BLCA	SMAD4	KEGG_TGF_BETA_SIGNALING_PATHWAY	0.125011596911663	0.409715284890808
BLCA	SMAD4	KEGG_ADHERENS_JUNCTION	0.891469252878642	0.957671432344397
BLCA	MYH3	KEGG_TIGHT_JUNCTION	0.661598291879467	0.848641299620455
BLCA	ATP6V1A	KEGG_OXIDATIVE_PHOSPHORYLATION	0.268871780301021	0.571505599377642
BLCA	GRM6	KEGG_NEUROACTIVE_LIGAND_RECEPTOR_INTERACTION	0.676169791466182	0.856027473338872
BLCA	PRUNE	KEGG_PURINE_METABOLISM	0.734556671552566	0.884926255131327
BLCA	EGF	KEGG_MAPK_SIGNALING_PATHWAY	0.554645839495585	0.788867199665684
BLCA	EGF	KEGG_ERBB_SIGNALING_PATHWAY	0.607882454258507	0.819655864828178
BLCA	EGF	KEGG_CYTOKINE_CYTOKINE_RECEPTOR_INTERACTION	0.0122906393448392	0.144437117768308
BLCA	EGF	KEGG_ENDOCYTOSIS	0.0138843631687141	0.151012174181606
BLCA	EGF	KEGG_FOCAL_ADHESION	0.139708051848737	0.428569206938802
BLCA	EGF	KEGG_GAP_JUNCTION	0.868048803560444	0.950692404033513
BLCA	EGF	KEGG_REGULATION_OF_ACTIN_CYTOSKELETON	0.607454496271963	0.81949917659484
BLCA	NDST3	KEGG_GLYCOSAMINOGLYCAN_BIOSYNTHESIS_HEPARAN_SULFATE	0.94734199343727	0.981485036657261
BLCA	ITGB6	KEGG_FOCAL_ADHESION	0.982955259966698	0.995756537770916
BLCA	ITGB6	KEGG_ECM_RECEPTOR_INTERACTION	0.279541882503763	0.581087254426527
BLCA	ITGB6	KEGG_REGULATION_OF_ACTIN_CYTOSKELETON	0.187504702524995	0.485729200117372
BLCA	MAGI1	KEGG_TIGHT_JUNCTION	0.189299951741069	0.487346684269561
BLCA	NLGN1	KEGG_CELL_ADHESION_MOLECULES_CAMS	0.665423356423604	0.850812934320508
BLCA	DGKG	KEGG_GLYCEROLIPID_METABOLISM	0.0223533917705072	0.186871531996652
BLCA	DGKG	KEGG_GLYCEROPHOSPHOLIPID_METABOLISM	0.42256849260918	0.69689195962282
BLCA	DGKG	KEGG_PHOSPHATIDYLINOSITOL_SIGNALING_SYSTEM	0.435999908839113	0.706319852319363
BLCA	PANK3	KEGG_PANTOTHENATE_AND_COA_BIOSYNTHESIS	0.745689541621728	0.890374956870044
BLCA	C5	KEGG_COMPLEMENT_AND_COAGULATION_CASCADES	0.586941546568637	0.807622800442235
BLCA	DCC	KEGG_AXON_GUIDANCE	0.903344442233634	0.961946410052053
BLCA	ABCB10	KEGG_ABC_TRANSPORTERS	0.516560439792355	0.762356402711169
BLCA	SLIT2	KEGG_AXON_GUIDANCE	0.524115240723209	0.769450790043165
BLCA	NEDD4	KEGG_UBIQUITIN_MEDIATED_PROTEOLYSIS	0.553605308583721	0.78817075414652
BLCA	NEDD4	KEGG_ENDOCYTOSIS	0.74229270405341	0.889064009828605
BLCA	MAP3K5	KEGG_MAPK_SIGNALING_PATHWAY	0.201567838005166	0.502380868204165
BLCA	MAP3K5	KEGG_NEUROTROPHIN_SIGNALING_PATHWAY	0.69260571084686	0.862435341381029
BLCA	ALG10	KEGG_N_GLYCAN_BIOSYNTHESIS	0.775632093617867	0.90613955120157
BLCA	SRSF1	KEGG_SPLICEOSOME	0.464049206291449	0.724688698352851
BLCA	DVL2	KEGG_WNT_SIGNALING_PATHWAY	0.407739691837965	0.687091782524608
BLCA	DVL2	KEGG_NOTCH_SIGNALING_PATHWAY	0.0967642353774774	0.363386070505302
BLCA	DVL2	KEGG_MELANOGENESIS	0.607164123902576	0.819300956587594
BLCA	NEU3	KEGG_OTHER_GLYCAN_DEGRADATION	0.121614050043739	0.404595826367511
BLCA	NEU3	KEGG_SPHINGOLIPID_METABOLISM	0.356311318938732	0.64750717051623
BLCA	OR2G2	KEGG_OLFACTORY_TRANSDUCTION	0.191164798582585	0.489192216947236
BLCA	NTNG1	KEGG_AXON_GUIDANCE	0.384415520916997	0.670080102516367
BLCA	EPB41L3	KEGG_TIGHT_JUNCTION	0.0280499756867096	0.21076446053765
BLCA	LCT	KEGG_GALACTOSE_METABOLISM	0.355567502193244	0.647029873198561
BLCA	PPP2R5D	KEGG_OOCYTE_MEIOSIS	0.130139658107949	0.416149686497882
BLCA	PPP2R5D	KEGG_WNT_SIGNALING_PATHWAY	0.0478081207928262	0.266203976806561
BLCA	F7	KEGG_COMPLEMENT_AND_COAGULATION_CASCADES	0.964314418001951	0.989084374802503
BLCA	CDH2	KEGG_CELL_ADHESION_MOLECULES_CAMS	0.473094392678958	0.73054957344359
BLCA	TAOK1	KEGG_MAPK_SIGNALING_PATHWAY	0.156549622180813	0.45087947311024
BLCA	MFSD8	KEGG_LYSOSOME	0.136497516042993	0.423879868865948
BLCA	UGT8	KEGG_SPHINGOLIPID_METABOLISM	0.988237858073715	0.997409679869593
BLCA	SKIV2L2	KEGG_RNA_DEGRADATION	0.980397692379904	0.994296128209379
BRCA	TP53	KEGG_MAPK_SIGNALING_PATHWAY	3.15000733758794e-25	3.85915273946242e-22
BRCA	TP53	KEGG_CELL_CYCLE	3.64039290085986e-11	1.0194140234665e-08
BRCA	TP53	KEGG_P53_SIGNALING_PATHWAY	2.32284151739217e-11	6.69593226822372e-09
BRCA	TP53	KEGG_APOPTOSIS	0.00677304632651772	0.110087275366833
BRCA	TP53	KEGG_WNT_SIGNALING_PATHWAY	3.05448973093413e-17	1.49685269264427e-14
BRCA	TP53	KEGG_NEUROTROPHIN_SIGNALING_PATHWAY	3.5977513696793e-06	0.000345701580139479
BRCA	PHKA2	KEGG_CALCIUM_SIGNALING_PATHWAY	0.06921337891618	0.317287337117624
BRCA	PHKA2	KEGG_INSULIN_SIGNALING_PATHWAY	0.455867949907913	0.720174367673671
BRCA	LIFR	KEGG_CYTOKINE_CYTOKINE_RECEPTOR_INTERACTION	0.622828701598594	0.828044506832314
BRCA	LIFR	KEGG_JAK_STAT_SIGNALING_PATHWAY	0.400645281935838	0.682433856144099
BRCA	COL6A6	KEGG_FOCAL_ADHESION	0.763244148829231	0.899754137921012
BRCA	COL6A6	KEGG_ECM_RECEPTOR_INTERACTION	0.723930117449642	0.879975081374667
BRCA	INPPL1	KEGG_INOSITOL_PHOSPHATE_METABOLISM	0.881500348719016	0.954544792596959
BRCA	INPPL1	KEGG_PHOSPHATIDYLINOSITOL_SIGNALING_SYSTEM	0.687590959976581	0.859686056733062
BRCA	CDKN1B	KEGG_ERBB_SIGNALING_PATHWAY	0.688673563066254	0.860490768945991
BRCA	CDKN1B	KEGG_CELL_CYCLE	0.439759940862479	0.708478658985546
BRCA	ELMO1	KEGG_CHEMOKINE_SIGNALING_PATHWAY	0.727678866321731	0.881160766184949
BRCA	MAP3K1	KEGG_MAPK_SIGNALING_PATHWAY	0.323501110830013	0.61917117381221
BRCA	MAP3K1	KEGG_UBIQUITIN_MEDIATED_PROTEOLYSIS	0.0591807605449736	0.294866141207949
BRCA	MAP3K1	KEGG_RIG_I_LIKE_RECEPTOR_SIGNALING_PATHWAY	6.2859930285402e-06	0.000581217147855873
BRCA	MAP3K1	KEGG_NEUROTROPHIN_SIGNALING_PATHWAY	1.23237160195642e-06	0.000131840387199741
BRCA	MAP3K1	KEGG_GNRH_SIGNALING_PATHWAY	0.635440280849566	0.834063237258149
BRCA	RYR3	KEGG_CALCIUM_SIGNALING_PATHWAY	0.0421479859541658	0.254455576567694
BRCA	SETD2	KEGG_LYSINE_DEGRADATION	0.00741643536817605	0.115744708065182
BRCA	NF1	KEGG_MAPK_SIGNALING_PATHWAY	0.427457009380496	0.700586312531479
BRCA	MAN2B1	KEGG_OTHER_GLYCAN_DEGRADATION	0.00323395495452655	0.0759627203467913
BRCA	MAN2B1	KEGG_LYSOSOME	0.0968533430622839	0.363386070505302
BRCA	F8	KEGG_COMPLEMENT_AND_COAGULATION_CASCADES	0.728677879889517	0.881348348988983
BRCA	ETS2	KEGG_DORSO_VENTRAL_AXIS_FORMATION	0.341025748134199	0.63345186656494
BRCA	VCL	KEGG_FOCAL_ADHESION	0.296156221484326	0.59497101894363
BRCA	VCL	KEGG_ADHERENS_JUNCTION	0.012706835446645	0.145501450990923
BRCA	VCL	KEGG_LEUKOCYTE_TRANSENDOTHELIAL_MIGRATION	0.305656362958827	0.603128249116059
BRCA	VCL	KEGG_REGULATION_OF_ACTIN_CYTOSKELETON	0.294524415012111	0.593845000284308
BRCA	INADL	KEGG_TIGHT_JUNCTION	0.125798995156688	0.410574742434465
BRCA	JAK1	KEGG_JAK_STAT_SIGNALING_PATHWAY	0.0647644155555768	0.30817096790603
BRCA	ORC2	KEGG_CELL_CYCLE	0.899569272064594	0.960736453689124
BRCA	PTEN	KEGG_INOSITOL_PHOSPHATE_METABOLISM	0.19064933193044	0.488008741901582
BRCA	PTEN	KEGG_PHOSPHATIDYLINOSITOL_SIGNALING_SYSTEM	0.378482868235928	0.665025204657643
BRCA	PTEN	KEGG_P53_SIGNALING_PATHWAY	5.00488113665731e-05	0.00352898129643009
BRCA	PTEN	KEGG_FOCAL_ADHESION	0.824109151997403	0.929505569823553
BRCA	PTEN	KEGG_TIGHT_JUNCTION	8.73795139109489e-06	0.000764648764143938
BRCA	MAP3K4	KEGG_MAPK_SIGNALING_PATHWAY	0.830650488626378	0.932234677548051
BRCA	MAP3K4	KEGG_GNRH_SIGNALING_PATHWAY	0.969297457055663	0.990330896532262
BRCA	SLIT2	KEGG_AXON_GUIDANCE	0.650435144173918	0.842190215328851
BRCA	RB1	KEGG_CELL_CYCLE	0.0302891629479734	0.218705493222033
BRCA	CDH1	KEGG_CELL_ADHESION_MOLECULES_CAMS	0.00365570595217406	0.0813969094781355
BRCA	CDH1	KEGG_ADHERENS_JUNCTION	0.00391472782138902	0.0838072867744634
BRCA	PTPRC	KEGG_CELL_ADHESION_MOLECULES_CAMS	0.130819714460013	0.417371100723499
BRCA	PTPRC	KEGG_T_CELL_RECEPTOR_SIGNALING_PATHWAY	0.410946027214574	0.688027120407763
BRCA	PTPRC	KEGG_FC_GAMMA_R_MEDIATED_PHAGOCYTOSIS	0.0895407956924477	0.353253889572142
BRCA	ABCB11	KEGG_ABC_TRANSPORTERS	0.927648080954124	0.972913733700521
BRCA	EPHA7	KEGG_AXON_GUIDANCE	0.0480888406540713	0.267187487103488
BRCA	MAP3K5	KEGG_MAPK_SIGNALING_PATHWAY	0.163938231049217	0.459730678093902
BRCA	MAP3K5	KEGG_NEUROTROPHIN_SIGNALING_PATHWAY	0.491727342372225	0.744656934887234
BRCA	RELN	KEGG_FOCAL_ADHESION	0.309906712688531	0.606487316057101
BRCA	RELN	KEGG_ECM_RECEPTOR_INTERACTION	0.809601252648434	0.922375750881737
BRCA	PIWIL1	KEGG_DORSO_VENTRAL_AXIS_FORMATION	0.246927890817311	0.549158215997383
BRCA	CNOT1	KEGG_RNA_DEGRADATION	0.0429355990061666	0.255502007200631
BRCA	SMAD4	KEGG_CELL_CYCLE	0.272771428539828	0.575426769504704
BRCA	SMAD4	KEGG_WNT_SIGNALING_PATHWAY	0.032854961496514	0.227220831223389
BRCA	SMAD4	KEGG_TGF_BETA_SIGNALING_PATHWAY	0.275375433398495	0.577967460581232
BRCA	SMAD4	KEGG_ADHERENS_JUNCTION	0.162043564505267	0.457597340787725
BRCA	PLXNA3	KEGG_AXON_GUIDANCE	0.114704355489224	0.392017176748064
BRCA	ROCK2	KEGG_CHEMOKINE_SIGNALING_PATHWAY	0.321057082754179	0.617601662036057
BRCA	ROCK2	KEGG_WNT_SIGNALING_PATHWAY	0.638855377993442	0.836002198952675
BRCA	ROCK2	KEGG_TGF_BETA_SIGNALING_PATHWAY	0.0160115976908617	0.161743602105874
BRCA	ROCK2	KEGG_AXON_GUIDANCE	0.604415380883678	0.817428890839937
BRCA	ROCK2	KEGG_FOCAL_ADHESION	0.147244294542083	0.439580058119694
BRCA	ROCK2	KEGG_LEUKOCYTE_TRANSENDOTHELIAL_MIGRATION	0.230446552203944	0.534246769284264
BRCA	ROCK2	KEGG_REGULATION_OF_ACTIN_CYTOSKELETON	0.842094141826458	0.937236385732856
BRCA	DGKG	KEGG_GLYCEROLIPID_METABOLISM	0.85143514257248	0.941864089430347
BRCA	DGKG	KEGG_GLYCEROPHOSPHOLIPID_METABOLISM	0.893195054750096	0.958524551801784
BRCA	DGKG	KEGG_PHOSPHATIDYLINOSITOL_SIGNALING_SYSTEM	0.968819379893346	0.99023868415212
BRCA	ABCA6	KEGG_ABC_TRANSPORTERS	0.42970019368909	0.701912111792175
BRCA	HDAC1	KEGG_CELL_CYCLE	0.736959905661292	0.886331341998427
BRCA	HDAC1	KEGG_NOTCH_SIGNALING_PATHWAY	0.924877531760952	0.971775802829019
BRCA	AMPD1	KEGG_PURINE_METABOLISM	0.288228562440942	0.589263275027883
BRCA	POLA1	KEGG_PURINE_METABOLISM	0.256114676759683	0.559282534696168
BRCA	POLA1	KEGG_PYRIMIDINE_METABOLISM	0.558563624594134	0.792140368202446
BRCA	POLA1	KEGG_DNA_REPLICATION	0.437345991145795	0.707214660818336
BRCA	ACACA	KEGG_PYRUVATE_METABOLISM	0.537731121442849	0.778573943213953
BRCA	ACACA	KEGG_PROPANOATE_METABOLISM	0.548098465157332	0.784901744200499
BRCA	ACACA	KEGG_INSULIN_SIGNALING_PATHWAY	0.539527040672201	0.779696922092044
BRCA	CACNA1A	KEGG_MAPK_SIGNALING_PATHWAY	0.188707504094879	0.486972682368065
BRCA	CACNA1A	KEGG_CALCIUM_SIGNALING_PATHWAY	0.520821003438769	0.766621299290683
BRCA	CACNA1A	KEGG_TASTE_TRANSDUCTION	0.130128198509452	0.416149686497882
BRCA	ARHGAP5	KEGG_FOCAL_ADHESION	0.587258053617504	0.807706452919612
BRCA	ARHGAP5	KEGG_LEUKOCYTE_TRANSENDOTHELIAL_MIGRATION	0.0745236161516943	0.328808572158366
BRCA	CAMK4	KEGG_CALCIUM_SIGNALING_PATHWAY	0.295613025489726	0.594440554539353
BRCA	CAMK4	KEGG_LONG_TERM_POTENTIATION	0.5581066059674	0.791835964835913
BRCA	CAMK4	KEGG_NEUROTROPHIN_SIGNALING_PATHWAY	0.0156755213111687	0.16038465612842
BRCA	CYP7B1	KEGG_PRIMARY_BILE_ACID_BIOSYNTHESIS	0.112361778376592	0.388546074977103
BRCA	CYP7B1	KEGG_STEROID_HORMONE_BIOSYNTHESIS	0.0223776924310313	0.186871531996652
BRCA	ACACB	KEGG_PYRUVATE_METABOLISM	0.906227679672971	0.962724392261955
BRCA	ACACB	KEGG_PROPANOATE_METABOLISM	0.17513319775365	0.471690154213664
BRCA	ACACB	KEGG_INSULIN_SIGNALING_PATHWAY	0.38182727077696	0.666955815520404
BRCA	ACACB	KEGG_ADIPOCYTOKINE_SIGNALING_PATHWAY	0.568688953953791	0.795806174609993
BRCA	CHSY3	KEGG_GLYCOSAMINOGLYCAN_BIOSYNTHESIS_CHONDROITIN_SULFATE	0.595908533304657	0.812534715486776
BRCA	FARP2	KEGG_ADHERENS_JUNCTION	0.820606953479974	0.928277200522224
BRCA	GRM3	KEGG_NEUROACTIVE_LIGAND_RECEPTOR_INTERACTION	0.395489281224233	0.6788424597686
BRCA	LAMA3	KEGG_FOCAL_ADHESION	0.241700592211279	0.544626709230587
BRCA	LAMA3	KEGG_ECM_RECEPTOR_INTERACTION	0.896246751132789	0.959383399721763
BRCA	SEMA5A	KEGG_AXON_GUIDANCE	0.121495401713055	0.404595826367511
BRCA	PYGM	KEGG_STARCH_AND_SUCROSE_METABOLISM	0.305374961147062	0.602827061607139
BRCA	PYGM	KEGG_INSULIN_SIGNALING_PATHWAY	0.252101249286975	0.554314381466147
BRCA	LAMA1	KEGG_FOCAL_ADHESION	0.483210897863667	0.738176302467629
BRCA	LAMA1	KEGG_ECM_RECEPTOR_INTERACTION	0.62604617391588	0.829215894347945
BRCA	PIK3R1	KEGG_ERBB_SIGNALING_PATHWAY	0.399156717092309	0.681428201088574
BRCA	PIK3R1	KEGG_CHEMOKINE_SIGNALING_PATHWAY	0.610981740308935	0.821646500705523
BRCA	PIK3R1	KEGG_PHOSPHATIDYLINOSITOL_SIGNALING_SYSTEM	0.849924008281822	0.941024384425038
BRCA	PIK3R1	KEGG_MTOR_SIGNALING_PATHWAY	0.0985709951468441	0.365561428360319
BRCA	PIK3R1	KEGG_APOPTOSIS	0.0109438927480626	0.13930012055034
BRCA	PIK3R1	KEGG_VEGF_SIGNALING_PATHWAY	0.674554026384538	0.855389314606658
BRCA	PIK3R1	KEGG_FOCAL_ADHESION	0.0910511839091907	0.354546147593952
BRCA	PIK3R1	KEGG_TOLL_LIKE_RECEPTOR_SIGNALING_PATHWAY	0.791069590092122	0.914006446599165
BRCA	PIK3R1	KEGG_JAK_STAT_SIGNALING_PATHWAY	0.0132627438517703	0.148050287575399
BRCA	PIK3R1	KEGG_NATURAL_KILLER_CELL_MEDIATED_CYTOTOXICITY	0.880977938063248	0.954295399089069
BRCA	PIK3R1	KEGG_T_CELL_RECEPTOR_SIGNALING_PATHWAY	0.0883887867069307	0.351867789810978
BRCA	PIK3R1	KEGG_B_CELL_RECEPTOR_SIGNALING_PATHWAY	0.0101341735516261	0.134952493178651
BRCA	PIK3R1	KEGG_FC_EPSILON_RI_SIGNALING_PATHWAY	0.930524476860962	0.974200849158798
BRCA	PIK3R1	KEGG_FC_GAMMA_R_MEDIATED_PHAGOCYTOSIS	0.0768167553554487	0.33208228328648
BRCA	PIK3R1	KEGG_LEUKOCYTE_TRANSENDOTHELIAL_MIGRATION	0.365865784780485	0.654484271512358
BRCA	PIK3R1	KEGG_NEUROTROPHIN_SIGNALING_PATHWAY	0.0547345490242625	0.283605838552119
BRCA	PIK3R1	KEGG_REGULATION_OF_ACTIN_CYTOSKELETON	0.56812905094426	0.795701002146616
BRCA	PIK3R1	KEGG_INSULIN_SIGNALING_PATHWAY	0.24174115605995	0.544626709230587
BRCA	PIK3R1	KEGG_PROGESTERONE_MEDIATED_OOCYTE_MATURATION	0.125891257620504	0.410681152033801
BRCA	PIK3R1	KEGG_ALDOSTERONE_REGULATED_SODIUM_REABSORPTION	0.331155729344733	0.624573205821154
BRCA	RUFY1	KEGG_ENDOCYTOSIS	0.204134479613109	0.505781674201025
BRCA	PPP1R3A	KEGG_INSULIN_SIGNALING_PATHWAY	0.565049467508554	0.795115119536225
BRCA	CACNA1B	KEGG_MAPK_SIGNALING_PATHWAY	0.205735635461774	0.507610283800853
BRCA	CACNA1B	KEGG_CALCIUM_SIGNALING_PATHWAY	0.880796262286372	0.954204063962499
BRCA	CACNA1B	KEGG_TASTE_TRANSDUCTION	0.0107933803270665	0.138469020023058
BRCA	APAF1	KEGG_P53_SIGNALING_PATHWAY	0.451883452680594	0.718353130830056
BRCA	APAF1	KEGG_APOPTOSIS	0.887239804961521	0.956428683377817
BRCA	SEMA6D	KEGG_AXON_GUIDANCE	0.18454617703712	0.482844922888631
BRCA	FLAD1	KEGG_RIBOFLAVIN_METABOLISM	0.901934331168332	0.961908952121216
BRCA	MYLK	KEGG_CALCIUM_SIGNALING_PATHWAY	0.0646774197958482	0.30817096790603
BRCA	MYLK	KEGG_FOCAL_ADHESION	0.00811773208769321	0.12220787094694
BRCA	MYLK	KEGG_REGULATION_OF_ACTIN_CYTOSKELETON	0.761863644818161	0.898599673657666
BRCA	ATP2B1	KEGG_CALCIUM_SIGNALING_PATHWAY	0.486728986449602	0.741023816874654
BRCA	CFTR	KEGG_ABC_TRANSPORTERS	0.15075592356848	0.444630759210742
BRCA	LPCAT4	KEGG_GLYCEROPHOSPHOLIPID_METABOLISM	0.660778816180267	0.848340335253686
BRCA	LPCAT4	KEGG_ETHER_LIPID_METABOLISM	0.270710560664538	0.573527772014263
BRCA	ATP2B3	KEGG_CALCIUM_SIGNALING_PATHWAY	0.678536417249647	0.856781167928857
BRCA	IL9R	KEGG_CYTOKINE_CYTOKINE_RECEPTOR_INTERACTION	0.0666856236276106	0.31201902512995
BRCA	IL9R	KEGG_JAK_STAT_SIGNALING_PATHWAY	0.0448073356606401	0.259702363577725
BRCA	IL9R	KEGG_HEMATOPOIETIC_CELL_LINEAGE	0.22275353338527	0.526454637258025
BRCA	COL6A3	KEGG_FOCAL_ADHESION	0.09960124908631	0.367957724197107
BRCA	COL6A3	KEGG_ECM_RECEPTOR_INTERACTION	0.0107109871631993	0.138459601656215
BRCA	NOTCH2	KEGG_DORSO_VENTRAL_AXIS_FORMATION	0.71097983757354	0.872431753299858
BRCA	NOTCH2	KEGG_NOTCH_SIGNALING_PATHWAY	0.543152108663288	0.782282706393664
BRCA	NOS3	KEGG_ARGININE_AND_PROLINE_METABOLISM	0.719386019963395	0.877415484214129
BRCA	NOS3	KEGG_CALCIUM_SIGNALING_PATHWAY	0.738284087513411	0.886698528956137
BRCA	NOS3	KEGG_VEGF_SIGNALING_PATHWAY	0.259258948881229	0.561223061322195
BRCA	ARHGAP35	KEGG_FOCAL_ADHESION	0.498948417030108	0.74830810027729
BRCA	ARHGAP35	KEGG_LEUKOCYTE_TRANSENDOTHELIAL_MIGRATION	0.255815753541812	0.559282534696168
BRCA	ARHGAP35	KEGG_REGULATION_OF_ACTIN_CYTOSKELETON	0.199472590263324	0.500432343543718
BRCA	WBSCR17	KEGG_O_GLYCAN_BIOSYNTHESIS	0.212977369281241	0.515478711772886
BRCA	EPHB3	KEGG_AXON_GUIDANCE	0.845783282610252	0.939123232600918
BRCA	IL2RB	KEGG_CYTOKINE_CYTOKINE_RECEPTOR_INTERACTION	0.807454020628306	0.921609043458487
BRCA	IL2RB	KEGG_ENDOCYTOSIS	0.0746186658522078	0.328808572158366
BRCA	IL2RB	KEGG_JAK_STAT_SIGNALING_PATHWAY	0.57189566831314	0.797886042012396
BRCA	ROBO1	KEGG_AXON_GUIDANCE	0.0832635163679013	0.343173138739193
BRCA	MTHFD1	KEGG_GLYOXYLATE_AND_DICARBOXYLATE_METABOLISM	0.984140550337054	0.996302676778954
BRCA	MTHFD1	KEGG_ONE_CARBON_POOL_BY_FOLATE	0.955965449429537	0.984906692931661
BRCA	AR	KEGG_OOCYTE_MEIOSIS	0.773202856580019	0.90470869447651
BRCA	ACE	KEGG_RENIN_ANGIOTENSIN_SYSTEM	0.377293606140672	0.664245488375198
BRCA	GRIN2B	KEGG_NEUROACTIVE_LIGAND_RECEPTOR_INTERACTION	0.0254866188010978	0.199964491117268
BRCA	GRIN2B	KEGG_LONG_TERM_POTENTIATION	0.423297251070275	0.697266614746179
BRCA	F5	KEGG_COMPLEMENT_AND_COAGULATION_CASCADES	0.112833244885872	0.389256822642179
BRCA	PPP2R5B	KEGG_OOCYTE_MEIOSIS	0.105389850017413	0.377936330414309
BRCA	PPP2R5B	KEGG_WNT_SIGNALING_PATHWAY	0.616357309015317	0.824261399265112
BRCA	MYO10	KEGG_FC_GAMMA_R_MEDIATED_PHAGOCYTOSIS	0.151623195069231	0.445728534755109
BRCA	ENPP1	KEGG_PURINE_METABOLISM	0.448049990887358	0.7150851588808
BRCA	ENPP1	KEGG_STARCH_AND_SUCROSE_METABOLISM	0.0375846839237378	0.241179559883735
BRCA	ENPP1	KEGG_RIBOFLAVIN_METABOLISM	0.0244295156030271	0.195235644773298
BRCA	ENPP1	KEGG_NICOTINATE_AND_NICOTINAMIDE_METABOLISM	0.989094939690885	0.99743477944816
BRCA	ENPP1	KEGG_PANTOTHENATE_AND_COA_BIOSYNTHESIS	0.0420682956669307	0.254455576567694
BRCA	NEDD4L	KEGG_UBIQUITIN_MEDIATED_PROTEOLYSIS	0.822230447784957	0.928954538183327
BRCA	NEDD4L	KEGG_ENDOCYTOSIS	0.108861499230214	0.383795523005514
BRCA	NEDD4L	KEGG_ALDOSTERONE_REGULATED_SODIUM_REABSORPTION	0.0536514408007404	0.281196375234451
BRCA	CHD8	KEGG_WNT_SIGNALING_PATHWAY	0.0476047760696207	0.265702967117513
BRCA	RAD54B	KEGG_HOMOLOGOUS_RECOMBINATION	0.222354038965215	0.526399018332868
BRCA	WHSC1L1	KEGG_LYSINE_DEGRADATION	0.583087134847653	0.804906620935471
BRCA	VCAN	KEGG_CELL_ADHESION_MOLECULES_CAMS	0.224366732768412	0.527749565315742
BRCA	ATM	KEGG_CELL_CYCLE	0.222909031635101	0.526560603770407
BRCA	ATM	KEGG_P53_SIGNALING_PATHWAY	0.418674625646242	0.693654121742182
BRCA	ATM	KEGG_APOPTOSIS	0.489273156763925	0.743237168233606
BRCA	NRCAM	KEGG_CELL_ADHESION_MOLECULES_CAMS	0.574728713718597	0.799789311821095
BRCA	UGT2B15	KEGG_PENTOSE_AND_GLUCURONATE_INTERCONVERSIONS	0.0736067396755936	0.326838916529946
BRCA	UGT2B15	KEGG_ASCORBATE_AND_ALDARATE_METABOLISM	0.141848705699302	0.431757504521385
BRCA	UGT2B15	KEGG_STEROID_HORMONE_BIOSYNTHESIS	0.412800500309568	0.689125822438098
BRCA	UGT2B15	KEGG_STARCH_AND_SUCROSE_METABOLISM	0.18308018860196	0.480677452046025
BRCA	UGT2B15	KEGG_RETINOL_METABOLISM	0.217006461831724	0.519884160309031
BRCA	UGT2B15	KEGG_PORPHYRIN_AND_CHLOROPHYLL_METABOLISM	0.046876108984298	0.264526393586756
BRCA	UGT2B15	KEGG_METABOLISM_OF_XENOBIOTICS_BY_CYTOCHROME_P450	0.422962479569424	0.697120057190526
BRCA	UGT2B15	KEGG_DRUG_METABOLISM_CYTOCHROME_P450	0.557928218191631	0.791812115044335
BRCA	UGT2B15	KEGG_DRUG_METABOLISM_OTHER_ENZYMES	0.971516634802485	0.990330896532262
BRCA	SERPINE1	KEGG_P53_SIGNALING_PATHWAY	0.0562920838695273	0.287503238147596
BRCA	SERPINE1	KEGG_COMPLEMENT_AND_COAGULATION_CASCADES	0.162400172124877	0.458170433792723
BRCA	PRKDC	KEGG_NON_HOMOLOGOUS_END_JOINING	0.223517267098261	0.526560603770407
BRCA	PRKDC	KEGG_CELL_CYCLE	0.655255037069606	0.844798029244831
BRCA	CACNA1C	KEGG_MAPK_SIGNALING_PATHWAY	0.943059390371163	0.979875194026247
BRCA	CACNA1C	KEGG_CALCIUM_SIGNALING_PATHWAY	0.0778880856841198	0.333791485697446
BRCA	CACNA1C	KEGG_LONG_TERM_POTENTIATION	0.446099237901884	0.713790173218116
BRCA	CACNA1C	KEGG_GNRH_SIGNALING_PATHWAY	0.63052919635008	0.832064208576227
BRCA	PIWIL3	KEGG_DORSO_VENTRAL_AXIS_FORMATION	0.0828791473812755	0.342597437150519
BRCA	TLN1	KEGG_FOCAL_ADHESION	0.976440593262163	0.992433578414948
BRCA	PDE6A	KEGG_PURINE_METABOLISM	0.228324227434115	0.53230456974894
BRCA	SMAD2	KEGG_CELL_CYCLE	0.0342066506239969	0.231213367424685
BRCA	SMAD2	KEGG_WNT_SIGNALING_PATHWAY	0.0915845553473498	0.354703569927432
BRCA	SMAD2	KEGG_TGF_BETA_SIGNALING_PATHWAY	0.655195955542876	0.844798029244831
BRCA	SMAD2	KEGG_ADHERENS_JUNCTION	0.0191607361646328	0.176332746619311
BRCA	ITGA11	KEGG_FOCAL_ADHESION	0.316817165540721	0.613278992237678
BRCA	ITGA11	KEGG_ECM_RECEPTOR_INTERACTION	0.341059636757799	0.63345186656494
BRCA	ITGA11	KEGG_REGULATION_OF_ACTIN_CYTOSKELETON	0.041170504434785	0.251583622925558
BRCA	INPP4A	KEGG_INOSITOL_PHOSPHATE_METABOLISM	0.840444234315859	0.936328580570386
BRCA	INPP4A	KEGG_PHOSPHATIDYLINOSITOL_SIGNALING_SYSTEM	0.35971797432595	0.650839185225888
BRCA	ABCA10	KEGG_ABC_TRANSPORTERS	0.632936545520302	0.833246169304128
BRCA	ATP1A4	KEGG_ALDOSTERONE_REGULATED_SODIUM_REABSORPTION	0.893365440328332	0.958602439310048
BRCA	ATP1A4	KEGG_PROXIMAL_TUBULE_BICARBONATE_RECLAMATION	0.858817369613038	0.94554808352925
BRCA	ITPR3	KEGG_CALCIUM_SIGNALING_PATHWAY	0.637120678015001	0.834927097904135
BRCA	ITPR3	KEGG_PHOSPHATIDYLINOSITOL_SIGNALING_SYSTEM	0.0508279782348691	0.274471082468293
BRCA	ITPR3	KEGG_OOCYTE_MEIOSIS	0.0384706268087851	0.2437206424481
BRCA	ITPR3	KEGG_GAP_JUNCTION	0.136584006559676	0.423879868865948
BRCA	ITPR3	KEGG_LONG_TERM_POTENTIATION	0.306364742696441	0.603796670655101
BRCA	ITPR3	KEGG_TASTE_TRANSDUCTION	0.0128130130005412	0.14568518225803
BRCA	ITPR3	KEGG_GNRH_SIGNALING_PATHWAY	0.902917942040698	0.961946410052053
BRCA	CFH	KEGG_COMPLEMENT_AND_COAGULATION_CASCADES	0.0709960492846406	0.3216977711691
BRCA	LAMB1	KEGG_FOCAL_ADHESION	0.441221051177143	0.709889201455658
BRCA	LAMB1	KEGG_ECM_RECEPTOR_INTERACTION	0.43820390552377	0.707882756245566
BRCA	UNC5D	KEGG_AXON_GUIDANCE	0.0629542514666301	0.304067658312
BRCA	MTOR	KEGG_ERBB_SIGNALING_PATHWAY	0.445454173619851	0.71314870232737
BRCA	MTOR	KEGG_MTOR_SIGNALING_PATHWAY	0.0851406340290432	0.346434865417956
BRCA	MTOR	KEGG_INSULIN_SIGNALING_PATHWAY	0.304654635932288	0.602364350771102
BRCA	MTOR	KEGG_ADIPOCYTOKINE_SIGNALING_PATHWAY	0.0338233752711415	0.230274675876054
BRCA	RASGRF1	KEGG_MAPK_SIGNALING_PATHWAY	0.299667717208433	0.598541531762758
BRCA	RASGRF1	KEGG_FOCAL_ADHESION	0.0559042695913774	0.286717815941962
BRCA	MYH7	KEGG_TIGHT_JUNCTION	0.228171624894691	0.53230456974894
BRCA	MCM4	KEGG_DNA_REPLICATION	0.151937169132286	0.446249983417901
BRCA	MCM4	KEGG_CELL_CYCLE	0.624992356687061	0.829044891368935
BRCA	NAMPT	KEGG_NICOTINATE_AND_NICOTINAMIDE_METABOLISM	0.590095492114445	0.809403575293371
BRCA	ALDH18A1	KEGG_ARGININE_AND_PROLINE_METABOLISM	0.0749021990430965	0.32906013011802
BRCA	ITPR2	KEGG_CALCIUM_SIGNALING_PATHWAY	0.0270762267079195	0.207323514034624
BRCA	ITPR2	KEGG_PHOSPHATIDYLINOSITOL_SIGNALING_SYSTEM	0.207183458940081	0.509562128248867
BRCA	ITPR2	KEGG_OOCYTE_MEIOSIS	0.00413478322434779	0.0856765547184623
BRCA	ITPR2	KEGG_GAP_JUNCTION	0.800923792068932	0.918135139981242
BRCA	ITPR2	KEGG_LONG_TERM_POTENTIATION	0.628932863961378	0.830862784699483
BRCA	ITPR2	KEGG_GNRH_SIGNALING_PATHWAY	0.920058820164892	0.969923521558536
BRCA	IARS	KEGG_VALINE_LEUCINE_AND_ISOLEUCINE_BIOSYNTHESIS	0.292571128370264	0.592456534949785
BRCA	IARS	KEGG_AMINOACYL_TRNA_BIOSYNTHESIS	0.578166059305087	0.801840320822012
BRCA	EEA1	KEGG_ENDOCYTOSIS	0.494416784879125	0.746643990565469
BRCA	CACNA1E	KEGG_MAPK_SIGNALING_PATHWAY	0.168271578696009	0.466102813424676
BRCA	CACNA1E	KEGG_CALCIUM_SIGNALING_PATHWAY	0.302740972978513	0.601278582043788
BRCA	NLRP3	KEGG_NOD_LIKE_RECEPTOR_SIGNALING_PATHWAY	0.549094987456858	0.785188207187725
BRCA	PIKFYVE	KEGG_INOSITOL_PHOSPHATE_METABOLISM	0.382657460125843	0.667810855892697
BRCA	PIKFYVE	KEGG_PHOSPHATIDYLINOSITOL_SIGNALING_SYSTEM	0.910034957519996	0.964748636252912
BRCA	PIKFYVE	KEGG_ENDOCYTOSIS	0.702627350811433	0.868070378695494
BRCA	PIKFYVE	KEGG_FC_GAMMA_R_MEDIATED_PHAGOCYTOSIS	0.187532140486222	0.485729200117372
BRCA	PIKFYVE	KEGG_REGULATION_OF_ACTIN_CYTOSKELETON	0.281605997747358	0.582688989097689
BRCA	SIGLEC1	KEGG_CELL_ADHESION_MOLECULES_CAMS	0.456634077957347	0.720455666139723
BRCA	PREX1	KEGG_CHEMOKINE_SIGNALING_PATHWAY	0.0113586477818296	0.141456298487563
BRCA	LTBP1	KEGG_TGF_BETA_SIGNALING_PATHWAY	0.613146233566888	0.822256860128918
BRCA	MYH1	KEGG_TIGHT_JUNCTION	0.0325610324288305	0.22642503077911
BRCA	CACNA1F	KEGG_MAPK_SIGNALING_PATHWAY	0.256969566544794	0.559380718487582
BRCA	CACNA1F	KEGG_CALCIUM_SIGNALING_PATHWAY	0.0680086600640073	0.314708629502991
BRCA	CACNA1F	KEGG_GNRH_SIGNALING_PATHWAY	0.843980185080263	0.938276973000415
BRCA	GRIK2	KEGG_NEUROACTIVE_LIGAND_RECEPTOR_INTERACTION	0.477842161435574	0.733949384771989
BRCA	DYNC1I1	KEGG_VASOPRESSIN_REGULATED_WATER_REABSORPTION	0.0218903304225225	0.186344221218869
BRCA	CAD	KEGG_PYRIMIDINE_METABOLISM	0.0715695248643827	0.322052928071457
BRCA	CAD	KEGG_ALANINE_ASPARTATE_AND_GLUTAMATE_METABOLISM	0.575094308777469	0.799851446562294
BRCA	DOCK2	KEGG_CHEMOKINE_SIGNALING_PATHWAY	0.0188829294796938	0.174595841349508
BRCA	DOCK2	KEGG_FC_GAMMA_R_MEDIATED_PHAGOCYTOSIS	0.0392469496894536	0.245461115139159
BRCA	PIK3CA	KEGG_INOSITOL_PHOSPHATE_METABOLISM	7.5710211285936e-07	8.52914690590183e-05
BRCA	PIK3CA	KEGG_ERBB_SIGNALING_PATHWAY	1.27600806067985e-06	0.000131840387199741
BRCA	PIK3CA	KEGG_CHEMOKINE_SIGNALING_PATHWAY	0.00325766838121207	0.0759627203467913
BRCA	PIK3CA	KEGG_PHOSPHATIDYLINOSITOL_SIGNALING_SYSTEM	0.0018569501880205	0.0541886355108128
BRCA	PIK3CA	KEGG_MTOR_SIGNALING_PATHWAY	6.99570953653752e-09	1.26972128088156e-06
BRCA	PIK3CA	KEGG_APOPTOSIS	6.2261868778336e-08	9.68616787137256e-06
BRCA	PIK3CA	KEGG_VEGF_SIGNALING_PATHWAY	1.59187238883071e-05	0.00128941663495288
BRCA	PIK3CA	KEGG_FOCAL_ADHESION	3.7877580459382e-07	4.5902489220361e-05
BRCA	PIK3CA	KEGG_TOLL_LIKE_RECEPTOR_SIGNALING_PATHWAY	3.44223408522038e-05	0.00257536918085839
BRCA	PIK3CA	KEGG_JAK_STAT_SIGNALING_PATHWAY	3.3759225423411e-35	6.61748336749702e-32
BRCA	PIK3CA	KEGG_NATURAL_KILLER_CELL_MEDIATED_CYTOTOXICITY	1.10673569497287e-28	1.5495880780613e-25
BRCA	PIK3CA	KEGG_T_CELL_RECEPTOR_SIGNALING_PATHWAY	0.097395824936866	0.364082371258747
BRCA	PIK3CA	KEGG_B_CELL_RECEPTOR_SIGNALING_PATHWAY	8.28402333611106e-08	1.21449270705363e-05
BRCA	PIK3CA	KEGG_FC_EPSILON_RI_SIGNALING_PATHWAY	3.58987014377373e-07	4.45371104799067e-05
BRCA	PIK3CA	KEGG_FC_GAMMA_R_MEDIATED_PHAGOCYTOSIS	2.00036875941613e-08	3.43958144053289e-06
BRCA	PIK3CA	KEGG_LEUKOCYTE_TRANSENDOTHELIAL_MIGRATION	0.67389685704016	0.855333825986328
BRCA	PIK3CA	KEGG_NEUROTROPHIN_SIGNALING_PATHWAY	9.4102312347215e-16	4.39188934911931e-13
BRCA	PIK3CA	KEGG_REGULATION_OF_ACTIN_CYTOSKELETON	1.4914045012958e-05	0.00122834079976472
BRCA	PIK3CA	KEGG_INSULIN_SIGNALING_PATHWAY	1.06281344240383e-05	0.00090579430860869
BRCA	PIK3CA	KEGG_PROGESTERONE_MEDIATED_OOCYTE_MATURATION	0.00247811335059713	0.064028388713837
BRCA	PIK3CA	KEGG_ALDOSTERONE_REGULATED_SODIUM_REABSORPTION	6.90594763761741e-21	4.51234618641922e-18
BRCA	ACTN4	KEGG_FOCAL_ADHESION	0.115617076742271	0.393459364288541
BRCA	ACTN4	KEGG_ADHERENS_JUNCTION	0.0913945994656666	0.354703569927432
BRCA	ACTN4	KEGG_TIGHT_JUNCTION	0.380714230129514	0.666955815520404
BRCA	ACTN4	KEGG_LEUKOCYTE_TRANSENDOTHELIAL_MIGRATION	0.476366717558081	0.733077825135013
BRCA	ACTN4	KEGG_REGULATION_OF_ACTIN_CYTOSKELETON	0.719719904961644	0.877415484214129
BRCA	PARP4	KEGG_BASE_EXCISION_REPAIR	0.940214794486807	0.978242590314777
BRCA	ERBB2	KEGG_ERBB_SIGNALING_PATHWAY	0.567250578767109	0.79550877823654
BRCA	ERBB2	KEGG_CALCIUM_SIGNALING_PATHWAY	3.54286911119637e-05	0.0026305803150633
BRCA	ERBB2	KEGG_FOCAL_ADHESION	0.35945264850523	0.650714497444226
BRCA	ERBB2	KEGG_ADHERENS_JUNCTION	0.0803049236539225	0.337797663833517
BRCA	LCT	KEGG_GALACTOSE_METABOLISM	0.701044277361256	0.867104361738727
BRCA	PTPRF	KEGG_CELL_ADHESION_MOLECULES_CAMS	0.383110214189431	0.66835954572333
BRCA	PTPRF	KEGG_ADHERENS_JUNCTION	0.179202317524757	0.475650228037485
BRCA	PTPRF	KEGG_INSULIN_SIGNALING_PATHWAY	0.89487949504309	0.958707672642082
BRCA	MAN2A1	KEGG_N_GLYCAN_BIOSYNTHESIS	0.56807992961496	0.795701002146616
BRCA	OR2F1	KEGG_OLFACTORY_TRANSDUCTION	0.252794999831767	0.555400984835496
BRCA	UBR5	KEGG_UBIQUITIN_MEDIATED_PROTEOLYSIS	0.469897363438505	0.727791412620226
BRCA	IQSEC2	KEGG_ENDOCYTOSIS	0.555449290900146	0.789666158995116
BRCA	TNN	KEGG_FOCAL_ADHESION	0.797449428374169	0.916066087999077
BRCA	TNN	KEGG_ECM_RECEPTOR_INTERACTION	0.853160047526752	0.942708187802672
BRCA	VNN2	KEGG_PANTOTHENATE_AND_COA_BIOSYNTHESIS	0.209259791240834	0.511866572020624
BRCA	GNPTAB	KEGG_LYSOSOME	0.119806550359784	0.401603789466059
BRCA	GUCY2C	KEGG_PURINE_METABOLISM	0.361119469834624	0.651930728283137
BRCA	OGDH	KEGG_CITRATE_CYCLE_TCA_CYCLE	0.964985801508165	0.989208852691301
BRCA	OGDH	KEGG_LYSINE_DEGRADATION	0.161243293608737	0.457597340787725
BRCA	OGDH	KEGG_TRYPTOPHAN_METABOLISM	0.180368260354566	0.477505492662967
BRCA	FZD6	KEGG_WNT_SIGNALING_PATHWAY	0.236414433381141	0.538908809034826
BRCA	FZD6	KEGG_MELANOGENESIS	0.34027640711109	0.632842489212552
BRCA	SARS	KEGG_AMINOACYL_TRNA_BIOSYNTHESIS	0.0521420371633698	0.278498150538522
BRCA	ERBB3	KEGG_ERBB_SIGNALING_PATHWAY	0.0330005511599061	0.227773522477634
BRCA	ERBB3	KEGG_CALCIUM_SIGNALING_PATHWAY	0.000338071497573236	0.0171680764130326
BRCA	ERBB3	KEGG_ENDOCYTOSIS	0.018076727473766	0.169865777536319
BRCA	MAGI1	KEGG_TIGHT_JUNCTION	0.757660351914664	0.896514440313367
BRCA	MYH8	KEGG_TIGHT_JUNCTION	0.652052129602122	0.843468687058814
BRCA	PVRL3	KEGG_CELL_ADHESION_MOLECULES_CAMS	0.787450324066066	0.912917036452746
BRCA	PVRL3	KEGG_ADHERENS_JUNCTION	0.232005152068848	0.535283073311389
BRCA	FBXW7	KEGG_UBIQUITIN_MEDIATED_PROTEOLYSIS	0.259659939314526	0.561298426383253
BRCA	FASN	KEGG_INSULIN_SIGNALING_PATHWAY	0.257044814467946	0.559380718487582
BRCA	ABCC4	KEGG_ABC_TRANSPORTERS	0.155440871031119	0.449175757783963
BRCA	ETV6	KEGG_DORSO_VENTRAL_AXIS_FORMATION	0.799831885717245	0.917644043423257
BRCA	DGKH	KEGG_GLYCEROLIPID_METABOLISM	0.0523994667264995	0.279112594231751
BRCA	DGKH	KEGG_GLYCEROPHOSPHOLIPID_METABOLISM	0.045905465482195	0.262803427097543
BRCA	DGKH	KEGG_PHOSPHATIDYLINOSITOL_SIGNALING_SYSTEM	0.0975121135143567	0.364082371258747
BRCA	MARS	KEGG_SELENOAMINO_ACID_METABOLISM	0.0853989314197785	0.346834460345225
BRCA	MARS	KEGG_AMINOACYL_TRNA_BIOSYNTHESIS	0.88128733546372	0.954419577334798
BRCA	PER1	KEGG_CIRCADIAN_RHYTHM_MAMMAL	0.424063924527868	0.697946384926962
BRCA	LYN	KEGG_CHEMOKINE_SIGNALING_PATHWAY	0.874994459142841	0.952821163519814
BRCA	LYN	KEGG_B_CELL_RECEPTOR_SIGNALING_PATHWAY	0.920587227106229	0.97007584269091
BRCA	LYN	KEGG_FC_EPSILON_RI_SIGNALING_PATHWAY	0.0122770313711857	0.144437117768308
BRCA	LYN	KEGG_FC_GAMMA_R_MEDIATED_PHAGOCYTOSIS	0.103417621915533	0.374716183409787
BRCA	TLR7	KEGG_TOLL_LIKE_RECEPTOR_SIGNALING_PATHWAY	0.396287287813742	0.67949819941611
BRCA	GABRB2	KEGG_NEUROACTIVE_LIGAND_RECEPTOR_INTERACTION	0.0233398459146269	0.190787180825069
BRCA	PTCH1	KEGG_HEDGEHOG_SIGNALING_PATHWAY	0.898709682562573	0.960469033985391
BRCA	CNGA4	KEGG_OLFACTORY_TRANSDUCTION	0.749925248162033	0.893184756013621
BRCA	NCKAP1L	KEGG_REGULATION_OF_ACTIN_CYTOSKELETON	0.767544871721722	0.902327850275231
BRCA	POLE	KEGG_PURINE_METABOLISM	0.254395063574895	0.557513659599688
BRCA	POLE	KEGG_PYRIMIDINE_METABOLISM	0.964040639094092	0.988964025932719
BRCA	POLE	KEGG_DNA_REPLICATION	0.656672107316478	0.845957324370242
BRCA	POLE	KEGG_BASE_EXCISION_REPAIR	0.0151061245330458	0.157368167335382
BRCA	POLE	KEGG_NUCLEOTIDE_EXCISION_REPAIR	0.297873803824844	0.596538853961442
BRCA	PAPOLA	KEGG_RNA_DEGRADATION	0.839410108654398	0.935637265429518
BRCA	FLNA	KEGG_MAPK_SIGNALING_PATHWAY	0.247670240346029	0.54965125143044
BRCA	FLNA	KEGG_FOCAL_ADHESION	0.06211738801925	0.302835219014744
BRCA	ARAP1	KEGG_ENDOCYTOSIS	0.722291532531982	0.878907959458427
BRCA	VANGL2	KEGG_WNT_SIGNALING_PATHWAY	0.143931348762682	0.434453695479842
BRCA	DGKI	KEGG_GLYCEROLIPID_METABOLISM	0.795032360957547	0.914510082157832
BRCA	DGKI	KEGG_GLYCEROPHOSPHOLIPID_METABOLISM	0.142616461364758	0.432750445150462
BRCA	DGKI	KEGG_PHOSPHATIDYLINOSITOL_SIGNALING_SYSTEM	0.22394924207822	0.527119721808029
BRCA	STAT3	KEGG_CHEMOKINE_SIGNALING_PATHWAY	0.235919246828272	0.538533935358903
BRCA	STAT3	KEGG_JAK_STAT_SIGNALING_PATHWAY	0.056230383791728	0.287487736850666
BRCA	STAT3	KEGG_ADIPOCYTOKINE_SIGNALING_PATHWAY	0.867453998391289	0.950543522578775
BRCA	GRIN3B	KEGG_NEUROACTIVE_LIGAND_RECEPTOR_INTERACTION	0.214477674022612	0.516687425818736
BRCA	KIDINS220	KEGG_NEUROTROPHIN_SIGNALING_PATHWAY	0.705578288975772	0.870062133766223
BRCA	TARS2	KEGG_AMINOACYL_TRNA_BIOSYNTHESIS	0.14960167608637	0.443199166118308
BRCA	PRKACA	KEGG_MAPK_SIGNALING_PATHWAY	0.473177147252329	0.730562259013875
BRCA	PRKACA	KEGG_CALCIUM_SIGNALING_PATHWAY	0.0939386080502561	0.359645428711156
BRCA	PRKACA	KEGG_CHEMOKINE_SIGNALING_PATHWAY	0.579527696698517	0.802479648960464
BRCA	PRKACA	KEGG_OOCYTE_MEIOSIS	0.0572392457961307	0.289624082626679
BRCA	PRKACA	KEGG_APOPTOSIS	0.0195849986109253	0.177898583304614
BRCA	PRKACA	KEGG_WNT_SIGNALING_PATHWAY	0.902101340681071	0.961908952121216
BRCA	PRKACA	KEGG_HEDGEHOG_SIGNALING_PATHWAY	0.326185426282502	0.62088626199161
BRCA	PRKACA	KEGG_GAP_JUNCTION	0.346109195377244	0.638474726876034
BRCA	PRKACA	KEGG_LONG_TERM_POTENTIATION	0.794781137219863	0.914510082157832
BRCA	PRKACA	KEGG_OLFACTORY_TRANSDUCTION	0.00456747086365077	0.0902112568693785
BRCA	PRKACA	KEGG_TASTE_TRANSDUCTION	0.0122019579788476	0.144301578349548
BRCA	PRKACA	KEGG_INSULIN_SIGNALING_PATHWAY	0.113590244444815	0.390083386756704
BRCA	PRKACA	KEGG_GNRH_SIGNALING_PATHWAY	0.892615402687627	0.958427208779736
BRCA	PRKACA	KEGG_PROGESTERONE_MEDIATED_OOCYTE_MATURATION	0.0122283925693565	0.144301578349548
BRCA	PRKACA	KEGG_MELANOGENESIS	0.418872414259936	0.693708775289225
BRCA	PRKACA	KEGG_VASOPRESSIN_REGULATED_WATER_REABSORPTION	0.73543603697827	0.885613539553265
BRCA	LAMA2	KEGG_FOCAL_ADHESION	0.813177004212894	0.92383769772697
BRCA	LAMA2	KEGG_ECM_RECEPTOR_INTERACTION	0.547703750052016	0.784901744200499
BRCA	PRKCQ	KEGG_TIGHT_JUNCTION	0.272445986838062	0.575260978394723
BRCA	PRKCQ	KEGG_T_CELL_RECEPTOR_SIGNALING_PATHWAY	0.690610188813279	0.860981742617278
BRCA	PRKCQ	KEGG_ADIPOCYTOKINE_SIGNALING_PATHWAY	0.402258085177801	0.683363681676652
BRCA	SETDB1	KEGG_LYSINE_DEGRADATION	0.31977983756636	0.616354412583657
BRCA	HTR1A	KEGG_NEUROACTIVE_LIGAND_RECEPTOR_INTERACTION	0.228324227434115	0.53230456974894
BRCA	ENPEP	KEGG_RENIN_ANGIOTENSIN_SYSTEM	0.674068273682864	0.855333825986328
BRCA	OR5M1	KEGG_OLFACTORY_TRANSDUCTION	0.746838184826486	0.890544204094025
BRCA	NLGN3	KEGG_CELL_ADHESION_MOLECULES_CAMS	0.852166563040316	0.942103573242625
BRCA	ABCA4	KEGG_ABC_TRANSPORTERS	0.0769201165918993	0.33208228328648
BRCA	RAD23B	KEGG_NUCLEOTIDE_EXCISION_REPAIR	0.82828259380988	0.931051350392208
BRCA	AMOTL1	KEGG_TIGHT_JUNCTION	0.689005903392266	0.86068657394183
BRCA	GABRA4	KEGG_NEUROACTIVE_LIGAND_RECEPTOR_INTERACTION	0.237093225922668	0.539028231794959
BRCA	SF3B1	KEGG_SPLICEOSOME	0.282670182896676	0.583375544866355
BRCA	EPS15	KEGG_ENDOCYTOSIS	0.507372719283028	0.755279468665395
BRCA	MAGI2	KEGG_TIGHT_JUNCTION	0.229111731331058	0.532745926162681
BRCA	C3	KEGG_COMPLEMENT_AND_COAGULATION_CASCADES	0.266568234141038	0.568829798131137
BRCA	EPRS	KEGG_PORPHYRIN_AND_CHLOROPHYLL_METABOLISM	0.218746493641574	0.52201957248139
BRCA	EPRS	KEGG_AMINOACYL_TRNA_BIOSYNTHESIS	0.0977290764118408	0.36418108260334
BRCA	MAN1B1	KEGG_N_GLYCAN_BIOSYNTHESIS	0.820355278108526	0.92812178813685
BRCA	WWP2	KEGG_UBIQUITIN_MEDIATED_PROTEOLYSIS	0.00817855213414134	0.122234865035824
BRCA	NLGN2	KEGG_CELL_ADHESION_MOLECULES_CAMS	0.366387639728489	0.65492709410522
BRCA	CBLB	KEGG_ERBB_SIGNALING_PATHWAY	0.550797291465544	0.786125241122585
BRCA	CBLB	KEGG_UBIQUITIN_MEDIATED_PROTEOLYSIS	0.315749779969103	0.612219497426098
BRCA	CBLB	KEGG_ENDOCYTOSIS	0.949707746815248	0.982203276945215
BRCA	CBLB	KEGG_JAK_STAT_SIGNALING_PATHWAY	0.0106162341897191	0.138180227481324
BRCA	CBLB	KEGG_T_CELL_RECEPTOR_SIGNALING_PATHWAY	0.800944336990064	0.918135139981242
BRCA	CBLB	KEGG_INSULIN_SIGNALING_PATHWAY	0.407217715071973	0.686510291164079
CESC	PTPRF	KEGG_CELL_ADHESION_MOLECULES_CAMS	0.859843012431378	0.946191343912895
CESC	PTPRF	KEGG_ADHERENS_JUNCTION	0.161105009962753	0.457597340787725
CESC	PTPRF	KEGG_INSULIN_SIGNALING_PATHWAY	0.511641578816762	0.758867904658457
CESC	PPAP2B	KEGG_GLYCEROLIPID_METABOLISM	0.22212751269343	0.525989792681398
CESC	PPAP2B	KEGG_GLYCEROPHOSPHOLIPID_METABOLISM	0.464704138537726	0.724747791020027
CESC	PPAP2B	KEGG_ETHER_LIPID_METABOLISM	0.179050212465298	0.475650228037485
CESC	PPAP2B	KEGG_SPHINGOLIPID_METABOLISM	0.462981841864268	0.724638299602633
CESC	PPAP2B	KEGG_FC_GAMMA_R_MEDIATED_PHAGOCYTOSIS	0.0506024182790798	0.273986510847579
CESC	HLA-B	KEGG_ENDOCYTOSIS	0.00561775169041204	0.0983206862816579
CESC	HLA-B	KEGG_CELL_ADHESION_MOLECULES_CAMS	0.466295160952262	0.725076768601161
CESC	HLA-B	KEGG_ANTIGEN_PROCESSING_AND_PRESENTATION	0.740113752080898	0.887546830294939
CESC	HLA-B	KEGG_NATURAL_KILLER_CELL_MEDIATED_CYTOTOXICITY	0.742428955940629	0.889118548041802
CESC	SESN3	KEGG_P53_SIGNALING_PATHWAY	0.0140249449635897	0.151720182768369
CESC	APAF1	KEGG_P53_SIGNALING_PATHWAY	0.0192939017095891	0.176575134608278
CESC	APAF1	KEGG_APOPTOSIS	0.478007154424266	0.734003865437803
CESC	GNB5	KEGG_CHEMOKINE_SIGNALING_PATHWAY	0.411604774248536	0.688027120407763
CESC	HERC1	KEGG_UBIQUITIN_MEDIATED_PROTEOLYSIS	0.469787519127545	0.727736284964291
CESC	CACNA1H	KEGG_MAPK_SIGNALING_PATHWAY	0.00484026768053736	0.0926858839248936
CESC	CACNA1H	KEGG_CALCIUM_SIGNALING_PATHWAY	0.753982367184738	0.894646632055402
CESC	ABCA9	KEGG_ABC_TRANSPORTERS	0.140556861409687	0.430364823079145
CESC	FBXW7	KEGG_UBIQUITIN_MEDIATED_PROTEOLYSIS	0.409065720154692	0.687463296804941
CESC	PRKDC	KEGG_NON_HOMOLOGOUS_END_JOINING	0.804121951092762	0.919450980799664
CESC	PRKDC	KEGG_CELL_CYCLE	0.948602097848477	0.981550798248831
CESC	RB1	KEGG_CELL_CYCLE	0.158433145774719	0.454103908267646
CESC	EP300	KEGG_CELL_CYCLE	1.01946436680288e-06	0.000113542843852671
CESC	EP300	KEGG_WNT_SIGNALING_PATHWAY	0.608372427193828	0.819834753049183
CESC	EP300	KEGG_NOTCH_SIGNALING_PATHWAY	0.0306804360392002	0.219648614770052
CESC	EP300	KEGG_TGF_BETA_SIGNALING_PATHWAY	0.66149392584753	0.848641299620455
CESC	EP300	KEGG_ADHERENS_JUNCTION	0.0131871887874326	0.147542964960761
CESC	EP300	KEGG_JAK_STAT_SIGNALING_PATHWAY	3.79359415044306e-07	4.5902489220361e-05
CESC	EP300	KEGG_LONG_TERM_POTENTIATION	0.00195797894799668	0.0557853246201031
CESC	EP300	KEGG_MELANOGENESIS	0.0836055592920415	0.343427530017309
CESC	LRP2	KEGG_HEDGEHOG_SIGNALING_PATHWAY	0.131347579262356	0.418238344493291
CESC	DOCK2	KEGG_CHEMOKINE_SIGNALING_PATHWAY	0.233297008323446	0.536125185578523
CESC	DOCK2	KEGG_FC_GAMMA_R_MEDIATED_PHAGOCYTOSIS	0.0379201240932307	0.241805553830679
CESC	ACACA	KEGG_PYRUVATE_METABOLISM	0.136839081980317	0.42402081393478
CESC	ACACA	KEGG_PROPANOATE_METABOLISM	0.353240468120975	0.64615711609811
CESC	ACACA	KEGG_INSULIN_SIGNALING_PATHWAY	0.680865780009771	0.857733356025163
CESC	RBL1	KEGG_CELL_CYCLE	0.172427528622482	0.469437066812103
CESC	RBL1	KEGG_TGF_BETA_SIGNALING_PATHWAY	0.244529552619173	0.547503766787168
CESC	DDX3X	KEGG_RIG_I_LIKE_RECEPTOR_SIGNALING_PATHWAY	0.160512441556203	0.457054747150594
CESC	ATG7	KEGG_REGULATION_OF_AUTOPHAGY	0.336337422339217	0.629552121139148
CESC	ROCK1	KEGG_CHEMOKINE_SIGNALING_PATHWAY	0.548438817875719	0.78505168015188
CESC	ROCK1	KEGG_WNT_SIGNALING_PATHWAY	0.326424166381645	0.621099447623083
CESC	ROCK1	KEGG_TGF_BETA_SIGNALING_PATHWAY	0.0826072009314827	0.342058573066061
CESC	ROCK1	KEGG_AXON_GUIDANCE	0.360839035325426	0.651544470380343
CESC	ROCK1	KEGG_FOCAL_ADHESION	0.152093972592102	0.446309289034489
CESC	ROCK1	KEGG_LEUKOCYTE_TRANSENDOTHELIAL_MIGRATION	0.668182547252315	0.852160981863362
CESC	ROCK1	KEGG_REGULATION_OF_ACTIN_CYTOSKELETON	0.108795263846566	0.383700029132851
CESC	SMAD4	KEGG_CELL_CYCLE	0.0268607802668554	0.206157014405207
CESC	SMAD4	KEGG_WNT_SIGNALING_PATHWAY	0.055305688550275	0.284737755327216
CESC	SMAD4	KEGG_TGF_BETA_SIGNALING_PATHWAY	0.0979966939404955	0.364226620140613
CESC	SMAD4	KEGG_ADHERENS_JUNCTION	0.909302743286228	0.964406036895176
CESC	CLTCL1	KEGG_LYSOSOME	0.149413500446367	0.442952727729838
CESC	CLTCL1	KEGG_ENDOCYTOSIS	0.836493681398428	0.934916484929854
CESC	POLE	KEGG_PURINE_METABOLISM	0.00508288351204506	0.0942434199229134
CESC	POLE	KEGG_PYRIMIDINE_METABOLISM	0.985931119689329	0.996607972780024
CESC	POLE	KEGG_DNA_REPLICATION	0.3744161530605	0.662033685034451
CESC	POLE	KEGG_BASE_EXCISION_REPAIR	0.846988408999877	0.939702671112497
CESC	POLE	KEGG_NUCLEOTIDE_EXCISION_REPAIR	0.0469716717049866	0.264526393586756
CESC	ABCA4	KEGG_ABC_TRANSPORTERS	0.721717154160677	0.878483585187381
CESC	ITGA8	KEGG_FOCAL_ADHESION	0.969752319764678	0.990330896532262
CESC	ITGA8	KEGG_ECM_RECEPTOR_INTERACTION	0.947268220965359	0.981485036657261
CESC	ITGA8	KEGG_CELL_ADHESION_MOLECULES_CAMS	0.0110115524324814	0.139558805716424
CESC	ITGA8	KEGG_REGULATION_OF_ACTIN_CYTOSKELETON	0.709136198462265	0.872431753299858
CESC	BRCA2	KEGG_HOMOLOGOUS_RECOMBINATION	0.882902585986395	0.954678262160414
CESC	L1CAM	KEGG_AXON_GUIDANCE	0.752653234188137	0.894043673285412
CESC	L1CAM	KEGG_CELL_ADHESION_MOLECULES_CAMS	0.679068221553807	0.856841377811595
CESC	XRN2	KEGG_RNA_DEGRADATION	0.053622689476158	0.281196375234451
CESC	LNPEP	KEGG_RENIN_ANGIOTENSIN_SYSTEM	0.312231282967262	0.609112023161253
CESC	FLNC	KEGG_MAPK_SIGNALING_PATHWAY	0.959280375583225	0.987180487304829
CESC	FLNC	KEGG_FOCAL_ADHESION	0.834051424665663	0.933809948953197
CESC	ROBO1	KEGG_AXON_GUIDANCE	0.778045868190868	0.907450204975515
CESC	EHMT1	KEGG_LYSINE_DEGRADATION	0.801860743544348	0.918648409991602
CESC	CNTNAP2	KEGG_CELL_ADHESION_MOLECULES_CAMS	0.469787519127545	0.727736284964291
CESC	FSHR	KEGG_NEUROACTIVE_LIGAND_RECEPTOR_INTERACTION	0.74683537786843	0.890544204094025
CESC	F8	KEGG_COMPLEMENT_AND_COAGULATION_CASCADES	0.336996310217594	0.62975043054191
CESC	MAN2B1	KEGG_OTHER_GLYCAN_DEGRADATION	0.147695046488265	0.440459471002846
CESC	MAN2B1	KEGG_LYSOSOME	0.906294798816324	0.962724392261955
CESC	ABCA12	KEGG_ABC_TRANSPORTERS	0.900579975088768	0.961292129802332
CESC	PTEN	KEGG_INOSITOL_PHOSPHATE_METABOLISM	0.944844439424213	0.980930797181293
CESC	PTEN	KEGG_PHOSPHATIDYLINOSITOL_SIGNALING_SYSTEM	0.0838504248822845	0.343569403959561
CESC	PTEN	KEGG_P53_SIGNALING_PATHWAY	2.84743343666505e-05	0.00221489643752017
CESC	PTEN	KEGG_FOCAL_ADHESION	0.356372059415437	0.64750717051623
CESC	PTEN	KEGG_TIGHT_JUNCTION	0.0883327506957922	0.351858566784431
CESC	TP53	KEGG_MAPK_SIGNALING_PATHWAY	8.81521071289302e-05	0.00561025196084834
CESC	TP53	KEGG_CELL_CYCLE	0.070341100071497	0.320640466115025
CESC	TP53	KEGG_P53_SIGNALING_PATHWAY	0.0142226970540462	0.152847208143319
CESC	TP53	KEGG_APOPTOSIS	0.0842087174799711	0.344461452429548
CESC	TP53	KEGG_WNT_SIGNALING_PATHWAY	0.000407745557519935	0.0199815710462644
CESC	TP53	KEGG_NEUROTROPHIN_SIGNALING_PATHWAY	0.173281732941923	0.470036092749067
CESC	EPHB1	KEGG_AXON_GUIDANCE	0.838733473741101	0.935527737780348
CESC	AASS	KEGG_LYSINE_DEGRADATION	0.416340574646462	0.691652542396664
CESC	PTPRC	KEGG_CELL_ADHESION_MOLECULES_CAMS	0.528793397499806	0.772696118387954
CESC	PTPRC	KEGG_T_CELL_RECEPTOR_SIGNALING_PATHWAY	0.165561381053098	0.462561885889799
CESC	PTPRC	KEGG_FC_GAMMA_R_MEDIATED_PHAGOCYTOSIS	0.332906899820934	0.626020822169028
CESC	NOTCH3	KEGG_DORSO_VENTRAL_AXIS_FORMATION	0.340890150005594	0.63337712989665
CESC	NOTCH3	KEGG_NOTCH_SIGNALING_PATHWAY	0.0871429263371771	0.35017950841766
CESC	SUCLA2	KEGG_CITRATE_CYCLE_TCA_CYCLE	0.0360073885080641	0.236851285078883
CESC	SUCLA2	KEGG_PROPANOATE_METABOLISM	0.962086432653887	0.988381763152278
CESC	SETD2	KEGG_LYSINE_DEGRADATION	0.391908492273934	0.675892157799899
CESC	CREBBP	KEGG_CELL_CYCLE	0.0195459092945863	0.177873219123714
CESC	CREBBP	KEGG_WNT_SIGNALING_PATHWAY	0.443874663305881	0.712194672489261
CESC	CREBBP	KEGG_NOTCH_SIGNALING_PATHWAY	0.629558798894848	0.831438843475474
CESC	CREBBP	KEGG_TGF_BETA_SIGNALING_PATHWAY	0.147884653388068	0.440459471002846
CESC	CREBBP	KEGG_ADHERENS_JUNCTION	0.099476485011528	0.367635380693057
CESC	CREBBP	KEGG_JAK_STAT_SIGNALING_PATHWAY	0.0598126714878573	0.296251931716225
CESC	CREBBP	KEGG_LONG_TERM_POTENTIATION	0.0272543051057908	0.207802252003243
CESC	CREBBP	KEGG_MELANOGENESIS	0.137077841990198	0.424352472945651
CESC	CACNB4	KEGG_MAPK_SIGNALING_PATHWAY	0.624058105286621	0.828682771559549
CESC	IFNGR1	KEGG_CYTOKINE_CYTOKINE_RECEPTOR_INTERACTION	0.816559254839648	0.925873343936475
CESC	IFNGR1	KEGG_JAK_STAT_SIGNALING_PATHWAY	0.822610759776219	0.929132033312728
CESC	IFNGR1	KEGG_NATURAL_KILLER_CELL_MEDIATED_CYTOTOXICITY	0.237959456080313	0.540496090160637
CESC	RAD21	KEGG_CELL_CYCLE	0.0655180414350284	0.309914249085286
CESC	PPP2R5E	KEGG_OOCYTE_MEIOSIS	0.630774668560554	0.832064208576227
CESC	PPP2R5E	KEGG_WNT_SIGNALING_PATHWAY	0.482386638319177	0.737941532592464
CESC	ITGB4	KEGG_FOCAL_ADHESION	0.726205693861387	0.88042825249491
CESC	ITGB4	KEGG_ECM_RECEPTOR_INTERACTION	0.365560563536118	0.654484271512358
CESC	ITGB4	KEGG_REGULATION_OF_ACTIN_CYTOSKELETON	0.133765590625235	0.420608454834112
CESC	CACNA1S	KEGG_MAPK_SIGNALING_PATHWAY	0.260276629348899	0.562011730391839
CESC	CACNA1S	KEGG_CALCIUM_SIGNALING_PATHWAY	0.232519889115735	0.535590674087231
CESC	CACNA1S	KEGG_GNRH_SIGNALING_PATHWAY	0.181139744986794	0.477887117258565
CESC	CYB5R1	KEGG_AMINO_SUGAR_AND_NUCLEOTIDE_SUGAR_METABOLISM	0.668592355857423	0.852240041586501
CESC	REN	KEGG_RENIN_ANGIOTENSIN_SYSTEM	0.579305388808981	0.802398546596498
CESC	AGPS	KEGG_ETHER_LIPID_METABOLISM	0.174653265090483	0.470785657632515
CESC	AGPS	KEGG_PEROXISOME	0.27271230931205	0.57542590819535
CESC	ERBB4	KEGG_ERBB_SIGNALING_PATHWAY	0.439398034387176	0.708079601287194
CESC	ERBB4	KEGG_CALCIUM_SIGNALING_PATHWAY	0.330565399331379	0.624184418525368
CESC	ERBB4	KEGG_ENDOCYTOSIS	0.0502649629857172	0.273528207598099
CESC	AGAP1	KEGG_ENDOCYTOSIS	0.992713475850303	0.998495389115285
CESC	RASA1	KEGG_MAPK_SIGNALING_PATHWAY	0.290007506351737	0.591542886525156
CESC	RASA1	KEGG_AXON_GUIDANCE	0.495654954020181	0.746643990565469
CESC	APC	KEGG_WNT_SIGNALING_PATHWAY	0.825815247044684	0.930176912647889
CESC	APC	KEGG_REGULATION_OF_ACTIN_CYTOSKELETON	0.981740038598864	0.995245564574624
CESC	NSD1	KEGG_LYSINE_DEGRADATION	0.37570063942041	0.663128618871167
CESC	RELN	KEGG_FOCAL_ADHESION	0.663662706913042	0.850157912750585
CESC	RELN	KEGG_ECM_RECEPTOR_INTERACTION	0.091336245255442	0.354698547510041
CESC	INPPL1	KEGG_INOSITOL_PHOSPHATE_METABOLISM	0.108739804535964	0.383658230529335
CESC	INPPL1	KEGG_PHOSPHATIDYLINOSITOL_SIGNALING_SYSTEM	0.64839807364635	0.841323574005281
CESC	CHD8	KEGG_WNT_SIGNALING_PATHWAY	0.46688890756759	0.725479055889664
CESC	MYH7	KEGG_TIGHT_JUNCTION	0.290823039907568	0.591899311646858
CESC	MYH2	KEGG_TIGHT_JUNCTION	0.768189372189607	0.902521885512078
CESC	MYH3	KEGG_TIGHT_JUNCTION	0.142456925847893	0.432614825490478
CESC	NF1	KEGG_MAPK_SIGNALING_PATHWAY	0.946416977619869	0.981485036657261
CESC	OCRL	KEGG_INOSITOL_PHOSPHATE_METABOLISM	0.318160267421243	0.614441139112434
CESC	OCRL	KEGG_PHOSPHATIDYLINOSITOL_SIGNALING_SYSTEM	0.7930704501895	0.914412169256348
CESC	ABCA13	KEGG_ABC_TRANSPORTERS	0.343439194019554	0.635410100554972
CESC	PSD	KEGG_ENDOCYTOSIS	0.0562854538393038	0.287503238147596
CESC	FLT1	KEGG_CYTOKINE_CYTOKINE_RECEPTOR_INTERACTION	0.0725677655525652	0.324025817849973
CESC	FLT1	KEGG_ENDOCYTOSIS	0.0401978986758553	0.247697958537782
CESC	FLT1	KEGG_FOCAL_ADHESION	0.241843651290024	0.544626709230587
CESC	ADAR	KEGG_CYTOSOLIC_DNA_SENSING_PATHWAY	0.22451362179249	0.52790460086042
CESC	PARD3	KEGG_CHEMOKINE_SIGNALING_PATHWAY	0.882184481163679	0.95466550221552
CESC	PARD3	KEGG_NEUROACTIVE_LIGAND_RECEPTOR_INTERACTION	0.025002946043051	0.197624092070922
CESC	PARD3	KEGG_ENDOCYTOSIS	0.0372260185210364	0.240350597842344
CESC	PARD3	KEGG_ADHERENS_JUNCTION	0.0153149817837292	0.158502784015132
CESC	PARD3	KEGG_TIGHT_JUNCTION	0.164878043208093	0.461379497618557
CESC	SMC1A	KEGG_CELL_CYCLE	0.134068640639756	0.420833694572858
CESC	SMC1A	KEGG_OOCYTE_MEIOSIS	0.0356967336926254	0.236277630768913
CESC	ABCA1	KEGG_ABC_TRANSPORTERS	0.740031488542665	0.887546830294939
CESC	SKIV2L2	KEGG_RNA_DEGRADATION	0.215357931323094	0.517727295415942
CESC	ARHGAP5	KEGG_FOCAL_ADHESION	0.0427014511825029	0.254882413544282
CESC	ARHGAP5	KEGG_LEUKOCYTE_TRANSENDOTHELIAL_MIGRATION	0.618354204598986	0.825117707185114
CESC	B2M	KEGG_ANTIGEN_PROCESSING_AND_PRESENTATION	0.17116977717564	0.468410105860696
CESC	MYH1	KEGG_TIGHT_JUNCTION	0.36531418313857	0.654320962891287
CESC	UBR5	KEGG_UBIQUITIN_MEDIATED_PROTEOLYSIS	0.274460746030449	0.57699409746467
CESC	PAK2	KEGG_MAPK_SIGNALING_PATHWAY	0.610875678261467	0.821646500705523
CESC	PAK2	KEGG_ERBB_SIGNALING_PATHWAY	0.12601646684199	0.410787430321656
CESC	PAK2	KEGG_AXON_GUIDANCE	0.920811287530088	0.970141483664166
CESC	PAK2	KEGG_FOCAL_ADHESION	0.06993148552039	0.31938419831563
CESC	PAK2	KEGG_T_CELL_RECEPTOR_SIGNALING_PATHWAY	0.696536347351649	0.864684861535696
CESC	PAK2	KEGG_REGULATION_OF_ACTIN_CYTOSKELETON	0.384943332352312	0.670486866960194
CESC	ARHGAP35	KEGG_FOCAL_ADHESION	0.00505120114986546	0.0942434199229134
CESC	ARHGAP35	KEGG_LEUKOCYTE_TRANSENDOTHELIAL_MIGRATION	0.818365090920958	0.926616942712143
CESC	ARHGAP35	KEGG_REGULATION_OF_ACTIN_CYTOSKELETON	0.545012374659878	0.783235525519276
CESC	PLXNA2	KEGG_AXON_GUIDANCE	0.359516274223088	0.650714497444226
CESC	DCC	KEGG_AXON_GUIDANCE	0.322419524000651	0.618781739251969
CESC	EGFR	KEGG_MAPK_SIGNALING_PATHWAY	0.223476507333917	0.526560603770407
CESC	EGFR	KEGG_ERBB_SIGNALING_PATHWAY	0.791374217512551	0.914006446599165
CESC	EGFR	KEGG_CALCIUM_SIGNALING_PATHWAY	0.20592590237955	0.507743338169049
CESC	EGFR	KEGG_CYTOKINE_CYTOKINE_RECEPTOR_INTERACTION	0.0727265567049039	0.324526079540087
CESC	EGFR	KEGG_ENDOCYTOSIS	0.012755265214841	0.14568518225803
CESC	EGFR	KEGG_DORSO_VENTRAL_AXIS_FORMATION	0.89833187303967	0.960375896724294
CESC	EGFR	KEGG_FOCAL_ADHESION	0.18277361110539	0.480387278746025
CESC	EGFR	KEGG_ADHERENS_JUNCTION	0.0409871343269146	0.250758366752865
CESC	EGFR	KEGG_GAP_JUNCTION	0.638825205334255	0.836002198952675
CESC	EGFR	KEGG_REGULATION_OF_ACTIN_CYTOSKELETON	0.724953773959644	0.88042825249491
CESC	EGFR	KEGG_GNRH_SIGNALING_PATHWAY	0.117957785263242	0.397895457936831
CESC	NEDD4L	KEGG_UBIQUITIN_MEDIATED_PROTEOLYSIS	0.712143606982204	0.872908544764742
CESC	NEDD4L	KEGG_ENDOCYTOSIS	0.408087257080511	0.687281143803345
CESC	NEDD4L	KEGG_ALDOSTERONE_REGULATED_SODIUM_REABSORPTION	0.0961265409913536	0.362639040899252
CESC	ARHGEF12	KEGG_AXON_GUIDANCE	0.301390031754369	0.60057993476777
CESC	ARHGEF12	KEGG_REGULATION_OF_ACTIN_CYTOSKELETON	0.245959872954932	0.548596906217212
CESC	SPIRE2	KEGG_DORSO_VENTRAL_AXIS_FORMATION	0.0280529354912644	0.21076446053765
CESC	SI	KEGG_STARCH_AND_SUCROSE_METABOLISM	0.663335592154152	0.850053591418265
CESC	VCAN	KEGG_CELL_ADHESION_MOLECULES_CAMS	0.839880835590939	0.93594906988366
CESC	JAK2	KEGG_CHEMOKINE_SIGNALING_PATHWAY	0.536510698268252	0.777791120123302
CESC	JAK2	KEGG_JAK_STAT_SIGNALING_PATHWAY	0.0122349363951101	0.144301578349548
CESC	JAK2	KEGG_ADIPOCYTOKINE_SIGNALING_PATHWAY	0.00953500168171538	0.130738058431869
CESC	GABRG3	KEGG_NEUROACTIVE_LIGAND_RECEPTOR_INTERACTION	0.16978071791647	0.467421577612169
CESC	LCMT1	KEGG_HISTIDINE_METABOLISM	0.547409279509835	0.784868327690951
CESC	LCMT1	KEGG_TYROSINE_METABOLISM	0.171372695589255	0.468410105860696
CESC	LCMT1	KEGG_SELENOAMINO_ACID_METABOLISM	0.227954881423892	0.53230456974894
CESC	EPHA2	KEGG_AXON_GUIDANCE	0.732552613301923	0.88347752952055
CESC	AR	KEGG_OOCYTE_MEIOSIS	0.498757456030803	0.748136184046205
CESC	PIK3R1	KEGG_ERBB_SIGNALING_PATHWAY	0.771408203741382	0.903871466028356
CESC	PIK3R1	KEGG_CHEMOKINE_SIGNALING_PATHWAY	0.786853179253877	0.912764588693011
CESC	PIK3R1	KEGG_PHOSPHATIDYLINOSITOL_SIGNALING_SYSTEM	0.0568514929436093	0.288555920424813
CESC	PIK3R1	KEGG_MTOR_SIGNALING_PATHWAY	0.28361403291794	0.583970827022842
CESC	PIK3R1	KEGG_APOPTOSIS	0.0555765552889178	0.285634933606022
CESC	PIK3R1	KEGG_VEGF_SIGNALING_PATHWAY	0.693558593270717	0.862978859971815
CESC	PIK3R1	KEGG_FOCAL_ADHESION	0.246258810638363	0.548666197560035
CESC	PIK3R1	KEGG_TOLL_LIKE_RECEPTOR_SIGNALING_PATHWAY	0.928368613539304	0.973461087118724
CESC	PIK3R1	KEGG_JAK_STAT_SIGNALING_PATHWAY	0.022237021507871	0.186756681918289
CESC	PIK3R1	KEGG_NATURAL_KILLER_CELL_MEDIATED_CYTOTOXICITY	0.0838279801395523	0.343569403959561
CESC	PIK3R1	KEGG_T_CELL_RECEPTOR_SIGNALING_PATHWAY	0.296005797811269	0.594864224799723
CESC	PIK3R1	KEGG_B_CELL_RECEPTOR_SIGNALING_PATHWAY	0.0327519115605794	0.226856173289921
CESC	PIK3R1	KEGG_FC_EPSILON_RI_SIGNALING_PATHWAY	0.463908136531201	0.724688698352851
CESC	PIK3R1	KEGG_FC_GAMMA_R_MEDIATED_PHAGOCYTOSIS	0.0261162257047855	0.203072023945186
CESC	PIK3R1	KEGG_LEUKOCYTE_TRANSENDOTHELIAL_MIGRATION	0.734133179646185	0.884696826965727
CESC	PIK3R1	KEGG_NEUROTROPHIN_SIGNALING_PATHWAY	0.142527626926717	0.432614825490478
CESC	PIK3R1	KEGG_REGULATION_OF_ACTIN_CYTOSKELETON	0.597074751442	0.813785236946606
CESC	PIK3R1	KEGG_INSULIN_SIGNALING_PATHWAY	0.495516375005271	0.746643990565469
CESC	PIK3R1	KEGG_PROGESTERONE_MEDIATED_OOCYTE_MATURATION	0.879970414241592	0.953735711954285
CESC	PIK3R1	KEGG_ALDOSTERONE_REGULATED_SODIUM_REABSORPTION	0.881921279538209	0.954578736692875
CESC	MYH8	KEGG_TIGHT_JUNCTION	0.556854719369777	0.791205147077875
CESC	NOTCH1	KEGG_DORSO_VENTRAL_AXIS_FORMATION	0.106850868156483	0.379987430624706
CESC	NOTCH1	KEGG_NOTCH_SIGNALING_PATHWAY	0.216440348140838	0.519343626402305
CESC	FLT3	KEGG_CYTOKINE_CYTOKINE_RECEPTOR_INTERACTION	0.435429481666371	0.706027582384338
CESC	FLT3	KEGG_HEMATOPOIETIC_CELL_LINEAGE	0.823074061251586	0.929244512245364
CESC	MLH1	KEGG_MISMATCH_REPAIR	0.0587027262465468	0.294370647532111
CESC	POLA1	KEGG_PURINE_METABOLISM	0.0215345569364909	0.185792423005763
CESC	POLA1	KEGG_PYRIMIDINE_METABOLISM	0.65690916841509	0.846040310070473
CESC	POLA1	KEGG_DNA_REPLICATION	0.112654640163046	0.388914451651291
CESC	TSC2	KEGG_P53_SIGNALING_PATHWAY	0.0138494258445915	0.150820247447601
CESC	TSC2	KEGG_MTOR_SIGNALING_PATHWAY	0.170766651626856	0.468410105860696
CESC	TSC2	KEGG_INSULIN_SIGNALING_PATHWAY	0.464991426073229	0.724747791020027
CESC	AGAP2	KEGG_ENDOCYTOSIS	0.423699383933132	0.697694499651987
CESC	MTMR1	KEGG_FRUCTOSE_AND_MANNOSE_METABOLISM	0.308026148772875	0.605386509711216
CESC	MTMR1	KEGG_RIBOFLAVIN_METABOLISM	0.176900379822465	0.473457297280169
CESC	NOTCH2	KEGG_DORSO_VENTRAL_AXIS_FORMATION	0.464940416774294	0.724747791020027
CESC	NOTCH2	KEGG_NOTCH_SIGNALING_PATHWAY	0.070982448916512	0.3216977711691
CESC	ACACB	KEGG_PYRUVATE_METABOLISM	0.015418268667418	0.158900579610267
CESC	ACACB	KEGG_PROPANOATE_METABOLISM	0.46152824149516	0.724009099716959
CESC	ACACB	KEGG_INSULIN_SIGNALING_PATHWAY	0.335122991857894	0.628162636312102
CESC	ACACB	KEGG_ADIPOCYTOKINE_SIGNALING_PATHWAY	0.562342253755642	0.794455955648633
CESC	DHX38	KEGG_SPLICEOSOME	0.184724305954071	0.482945600457258
CESC	PDE3A	KEGG_PURINE_METABOLISM	0.200539751532835	0.501144850783609
CESC	PDE3A	KEGG_INSULIN_SIGNALING_PATHWAY	0.0913392689014441	0.354698547510041
CESC	PDE3A	KEGG_PROGESTERONE_MEDIATED_OOCYTE_MATURATION	0.789194642687576	0.913903550054796
CESC	ATP2B3	KEGG_CALCIUM_SIGNALING_PATHWAY	0.891520676329995	0.957671432344397
CESC	EPB41	KEGG_TIGHT_JUNCTION	0.0387366534338524	0.244467443853952
CESC	FLNA	KEGG_MAPK_SIGNALING_PATHWAY	0.201778200837723	0.502592664140727
CESC	FLNA	KEGG_FOCAL_ADHESION	0.223068405999724	0.526560603770407
CESC	MAGI3	KEGG_TIGHT_JUNCTION	0.0233360979633513	0.190787180825069
CESC	MYH15	KEGG_TIGHT_JUNCTION	0.214186443895	0.516602210515673
CESC	MAP3K5	KEGG_MAPK_SIGNALING_PATHWAY	0.0469711783927632	0.264526393586756
CESC	MAP3K5	KEGG_NEUROTROPHIN_SIGNALING_PATHWAY	0.180422860023406	0.477505492662967
CESC	MAP3K4	KEGG_MAPK_SIGNALING_PATHWAY	0.518194672125731	0.763962993607745
CESC	MAP3K4	KEGG_GNRH_SIGNALING_PATHWAY	0.0313043493018029	0.222813309736362
CESC	C5AR1	KEGG_NEUROACTIVE_LIGAND_RECEPTOR_INTERACTION	0.12900345195083	0.41447613175944
CESC	C5AR1	KEGG_COMPLEMENT_AND_COAGULATION_CASCADES	0.0263329531460916	0.203626661446686
CESC	MYO10	KEGG_FC_GAMMA_R_MEDIATED_PHAGOCYTOSIS	0.361609148356947	0.652185300955538
CESC	ERBB2	KEGG_ERBB_SIGNALING_PATHWAY	0.0987089584550096	0.365902610369724
CESC	ERBB2	KEGG_CALCIUM_SIGNALING_PATHWAY	0.00055816579210502	0.0246422654433392
CESC	ERBB2	KEGG_FOCAL_ADHESION	0.102798988319521	0.3742692735957
CESC	ERBB2	KEGG_ADHERENS_JUNCTION	0.000736998316350256	0.0298484318121854
CESC	TBL1XR1	KEGG_WNT_SIGNALING_PATHWAY	0.0544983423579862	0.283156128274979
CESC	FZD10	KEGG_WNT_SIGNALING_PATHWAY	0.493430123201369	0.745915579164204
CESC	FZD10	KEGG_MELANOGENESIS	0.0716922410075659	0.322052928071457
CESC	PIK3CA	KEGG_INOSITOL_PHOSPHATE_METABOLISM	0.0162891240896743	0.162576074544702
CESC	PIK3CA	KEGG_ERBB_SIGNALING_PATHWAY	0.39188180407957	0.675892157799899
CESC	PIK3CA	KEGG_CHEMOKINE_SIGNALING_PATHWAY	0.0472133690063646	0.265005833497286
CESC	PIK3CA	KEGG_PHOSPHATIDYLINOSITOL_SIGNALING_SYSTEM	0.0002933411027416	0.0151317691998443
CESC	PIK3CA	KEGG_MTOR_SIGNALING_PATHWAY	0.0599329946804762	0.296646172417407
CESC	PIK3CA	KEGG_APOPTOSIS	0.00156472583403451	0.048455166628378
CESC	PIK3CA	KEGG_VEGF_SIGNALING_PATHWAY	0.0406560166238294	0.249511345604353
CESC	PIK3CA	KEGG_FOCAL_ADHESION	0.0338328265749941	0.230274675876054
CESC	PIK3CA	KEGG_TOLL_LIKE_RECEPTOR_SIGNALING_PATHWAY	0.000446257877551275	0.0212268724270263
CESC	PIK3CA	KEGG_JAK_STAT_SIGNALING_PATHWAY	3.6621844450875e-12	1.19643565821009e-09
CESC	PIK3CA	KEGG_NATURAL_KILLER_CELL_MEDIATED_CYTOTOXICITY	4.52170376880189e-09	8.52254204577449e-07
CESC	PIK3CA	KEGG_T_CELL_RECEPTOR_SIGNALING_PATHWAY	0.251073264776926	0.554003716637266
CESC	PIK3CA	KEGG_B_CELL_RECEPTOR_SIGNALING_PATHWAY	0.0082902969313702	0.122924659946081
CESC	PIK3CA	KEGG_FC_EPSILON_RI_SIGNALING_PATHWAY	4.84766316752602e-05	0.00349352549300901
CESC	PIK3CA	KEGG_FC_GAMMA_R_MEDIATED_PHAGOCYTOSIS	2.18711339813873e-06	0.000220988643455234
CESC	PIK3CA	KEGG_LEUKOCYTE_TRANSENDOTHELIAL_MIGRATION	0.0323176929779416	0.225965771283832
CESC	PIK3CA	KEGG_NEUROTROPHIN_SIGNALING_PATHWAY	0.00502000370379347	0.0940014087806992
CESC	PIK3CA	KEGG_REGULATION_OF_ACTIN_CYTOSKELETON	0.00926013392737627	0.129246343712326
CESC	PIK3CA	KEGG_INSULIN_SIGNALING_PATHWAY	0.0210925174162596	0.183758011730454
CESC	PIK3CA	KEGG_PROGESTERONE_MEDIATED_OOCYTE_MATURATION	0.00234947397482721	0.0632337344162709
CESC	PIK3CA	KEGG_ALDOSTERONE_REGULATED_SODIUM_REABSORPTION	0.00195044826538391	0.0557853246201031
CESC	MAPK1	KEGG_MAPK_SIGNALING_PATHWAY	0.177252662213221	0.473882526555313
CESC	MAPK1	KEGG_ERBB_SIGNALING_PATHWAY	0.539614598538888	0.779708488910459
CESC	MAPK1	KEGG_CHEMOKINE_SIGNALING_PATHWAY	0.245802371696274	0.548414716101308
CESC	MAPK1	KEGG_OOCYTE_MEIOSIS	0.197766747663977	0.498280692507619
CESC	MAPK1	KEGG_MTOR_SIGNALING_PATHWAY	0.199526239882113	0.500432343543718
CESC	MAPK1	KEGG_DORSO_VENTRAL_AXIS_FORMATION	0.0300141810129673	0.218226252305707
CESC	MAPK1	KEGG_TGF_BETA_SIGNALING_PATHWAY	0.720449805839323	0.877589490550654
CESC	MAPK1	KEGG_AXON_GUIDANCE	0.441968761768322	0.710388623100393
CESC	MAPK1	KEGG_VEGF_SIGNALING_PATHWAY	0.0668962534105866	0.312570268046887
CESC	MAPK1	KEGG_FOCAL_ADHESION	0.994317186607796	0.998705990410052
CESC	MAPK1	KEGG_ADHERENS_JUNCTION	0.492487902214514	0.745130363735452
CESC	MAPK1	KEGG_GAP_JUNCTION	0.156377787144821	0.450516958202937
CESC	MAPK1	KEGG_TOLL_LIKE_RECEPTOR_SIGNALING_PATHWAY	0.0433489033373295	0.256714562905841
CESC	MAPK1	KEGG_NOD_LIKE_RECEPTOR_SIGNALING_PATHWAY	0.0064484502985212	0.107656924169619
CESC	MAPK1	KEGG_NATURAL_KILLER_CELL_MEDIATED_CYTOTOXICITY	0.000753736766065326	0.0300299757894563
CESC	MAPK1	KEGG_T_CELL_RECEPTOR_SIGNALING_PATHWAY	0.858812076104796	0.94554808352925
CESC	MAPK1	KEGG_B_CELL_RECEPTOR_SIGNALING_PATHWAY	0.340671365983144	0.633241946554667
CESC	MAPK1	KEGG_FC_EPSILON_RI_SIGNALING_PATHWAY	0.00326202082671699	0.0759627203467913
CESC	MAPK1	KEGG_FC_GAMMA_R_MEDIATED_PHAGOCYTOSIS	0.01622890050341	0.162140116038656
CESC	MAPK1	KEGG_LONG_TERM_POTENTIATION	0.0436921809404504	0.257031623244964
CESC	MAPK1	KEGG_NEUROTROPHIN_SIGNALING_PATHWAY	0.00858018958918537	0.123950084833182
CESC	MAPK1	KEGG_REGULATION_OF_ACTIN_CYTOSKELETON	0.00900563702833907	0.126634502890604
CESC	MAPK1	KEGG_INSULIN_SIGNALING_PATHWAY	0.0365560340500061	0.23792215979999
CESC	MAPK1	KEGG_GNRH_SIGNALING_PATHWAY	0.460649664555583	0.723606623190898
CESC	MAPK1	KEGG_PROGESTERONE_MEDIATED_OOCYTE_MATURATION	0.0341488952807678	0.231141797408015
CESC	MAPK1	KEGG_MELANOGENESIS	0.239985102645077	0.542832677365428
CESC	MAPK1	KEGG_ALDOSTERONE_REGULATED_SODIUM_REABSORPTION	0.366811745146987	0.655087812351607
CESC	CUL1	KEGG_CELL_CYCLE	0.0161143006639674	0.161743602105874
CESC	CUL1	KEGG_OOCYTE_MEIOSIS	0.576200496554121	0.800088201278401
CESC	CUL1	KEGG_UBIQUITIN_MEDIATED_PROTEOLYSIS	0.533442555709479	0.775592714509509
CESC	CUL1	KEGG_WNT_SIGNALING_PATHWAY	0.189676748202591	0.487375725280942
CESC	CUL1	KEGG_TGF_BETA_SIGNALING_PATHWAY	0.136571297609017	0.423879868865948
CESC	KIT	KEGG_CYTOKINE_CYTOKINE_RECEPTOR_INTERACTION	0.0339374087520724	0.230666118709474
CESC	KIT	KEGG_ENDOCYTOSIS	0.0912740312106812	0.354698547510041
CESC	KIT	KEGG_HEMATOPOIETIC_CELL_LINEAGE	0.750225038122116	0.893256197106863
CESC	KIT	KEGG_MELANOGENESIS	0.225311887429716	0.529008234339202
CESC	GNAI3	KEGG_CHEMOKINE_SIGNALING_PATHWAY	0.607696826771593	0.819600467756761
CESC	GNAI3	KEGG_AXON_GUIDANCE	0.330417481837205	0.624184418525368
CESC	GNAI3	KEGG_TIGHT_JUNCTION	0.439181696892793	0.708047656893532
CESC	GNAI3	KEGG_GAP_JUNCTION	0.673328924982281	0.855309109334431
CESC	GNAI3	KEGG_LEUKOCYTE_TRANSENDOTHELIAL_MIGRATION	0.967819724208813	0.990023367236572
CESC	GNAI3	KEGG_PROGESTERONE_MEDIATED_OOCYTE_MATURATION	0.995976391402632	0.99895219081368
CESC	GNAI3	KEGG_MELANOGENESIS	0.639079197887958	0.836152078293936
CESC	FUT9	KEGG_GLYCOSPHINGOLIPID_BIOSYNTHESIS_LACTO_AND_NEOLACTO_SERIES	0.752653234188137	0.894043673285412
CESC	FUT9	KEGG_GLYCOSPHINGOLIPID_BIOSYNTHESIS_GLOBO_SERIES	0.435429481666371	0.706027582384338
CESC	ERBB3	KEGG_ERBB_SIGNALING_PATHWAY	0.363730401871807	0.653394734007621
CESC	ERBB3	KEGG_CALCIUM_SIGNALING_PATHWAY	0.074787290962128	0.328970307339353
CESC	ERBB3	KEGG_ENDOCYTOSIS	0.0150220941860135	0.157368167335382
CESC	IQSEC2	KEGG_ENDOCYTOSIS	0.938468512080411	0.977507888719643
CESC	RPS6KA3	KEGG_MAPK_SIGNALING_PATHWAY	0.564694434986495	0.795115119536225
CESC	RPS6KA3	KEGG_OOCYTE_MEIOSIS	0.267505986811979	0.570086144106155
CESC	RPS6KA3	KEGG_MTOR_SIGNALING_PATHWAY	0.527155990895051	0.771603325382676
CESC	RPS6KA3	KEGG_LONG_TERM_POTENTIATION	0.0472425732545894	0.265005833497286
CESC	RPS6KA3	KEGG_NEUROTROPHIN_SIGNALING_PATHWAY	0.0912530292648705	0.354698547510041
CESC	RPS6KA3	KEGG_PROGESTERONE_MEDIATED_OOCYTE_MATURATION	0.672337965812554	0.854901972357141
CESC	FYN	KEGG_AXON_GUIDANCE	0.750306295403486	0.893256197106863
CESC	FYN	KEGG_FOCAL_ADHESION	0.0395674154642578	0.245754270573632
CESC	FYN	KEGG_ADHERENS_JUNCTION	0.0166870680182335	0.163823602741455
CESC	FYN	KEGG_NATURAL_KILLER_CELL_MEDIATED_CYTOTOXICITY	0.742288905252577	0.889064009828605
CESC	FYN	KEGG_T_CELL_RECEPTOR_SIGNALING_PATHWAY	0.116963269903606	0.396535639653165
CESC	FYN	KEGG_FC_EPSILON_RI_SIGNALING_PATHWAY	0.424733638962568	0.698693252009421
CESC	STK11	KEGG_MTOR_SIGNALING_PATHWAY	0.00702958960315487	0.113131375534517
CESC	STK11	KEGG_ADIPOCYTOKINE_SIGNALING_PATHWAY	0.744646619252455	0.890142885143714
CESC	ITGA4	KEGG_FOCAL_ADHESION	0.00897026004183494	0.126500026863344
CESC	ITGA4	KEGG_ECM_RECEPTOR_INTERACTION	0.661370942690082	0.848641299620455
CESC	ITGA4	KEGG_CELL_ADHESION_MOLECULES_CAMS	0.76267105059885	0.899403076274736
CESC	ITGA4	KEGG_HEMATOPOIETIC_CELL_LINEAGE	0.922319177516498	0.97048326229362
CESC	ITGA4	KEGG_LEUKOCYTE_TRANSENDOTHELIAL_MIGRATION	0.994352986272783	0.998705990410052
CESC	ITGA4	KEGG_INTESTINAL_IMMUNE_NETWORK_FOR_IGA_PRODUCTION	0.182552501862486	0.480063609003012
CESC	ITGA4	KEGG_REGULATION_OF_ACTIN_CYTOSKELETON	0.403633333859502	0.684401749778683
CESC	ABCA2	KEGG_ABC_TRANSPORTERS	0.612846488224066	0.822021134676895
CESC	ABCA2	KEGG_LYSOSOME	0.102854342254448	0.374331752111342
CESC	CHST1	KEGG_GLYCOSAMINOGLYCAN_BIOSYNTHESIS_KERATAN_SULFATE	0.784322133396269	0.912095542170958
CESC	LCT	KEGG_GALACTOSE_METABOLISM	0.768189372189607	0.902521885512078
CESC	SEMA3A	KEGG_AXON_GUIDANCE	0.474110468249885	0.731537027137241
CESC	RXRA	KEGG_PPAR_SIGNALING_PATHWAY	0.00645730144341618	0.107656924169619
CESC	RXRA	KEGG_ADIPOCYTOKINE_SIGNALING_PATHWAY	0.151324701743776	0.445051836893308
CESC	CACNA1C	KEGG_MAPK_SIGNALING_PATHWAY	0.152873360408751	0.446660175007831
CESC	CACNA1C	KEGG_CALCIUM_SIGNALING_PATHWAY	0.336894713638491	0.62975043054191
CESC	CACNA1C	KEGG_LONG_TERM_POTENTIATION	0.147871102968802	0.440459471002846
CESC	CACNA1C	KEGG_GNRH_SIGNALING_PATHWAY	0.00979747289885275	0.132814705230506
CESC	ACVRL1	KEGG_CYTOKINE_CYTOKINE_RECEPTOR_INTERACTION	0.085417703353112	0.346834460345225
CESC	ACVRL1	KEGG_TGF_BETA_SIGNALING_PATHWAY	0.133156551374519	0.420608454834112
CESC	GUCY2D	KEGG_PURINE_METABOLISM	0.280484298860524	0.581681467019043
CESC	GUCY2D	KEGG_OLFACTORY_TRANSDUCTION	0.20556574541514	0.507610283800853
CESC	ACTN4	KEGG_FOCAL_ADHESION	0.0616591868592828	0.301858986217698
CESC	ACTN4	KEGG_ADHERENS_JUNCTION	0.0172615327478206	0.16586302202097
CESC	ACTN4	KEGG_TIGHT_JUNCTION	0.566616115809773	0.795481806118046
CESC	ACTN4	KEGG_LEUKOCYTE_TRANSENDOTHELIAL_MIGRATION	0.244248557088126	0.547503766787168
CESC	ACTN4	KEGG_REGULATION_OF_ACTIN_CYTOSKELETON	0.646438084503917	0.839915435843489
CESC	JAG1	KEGG_NOTCH_SIGNALING_PATHWAY	0.598659811206865	0.814486578791864
CESC	ACSS1	KEGG_GLYCOLYSIS_GLUCONEOGENESIS	0.186567156703262	0.484799008388329
CESC	ACSS1	KEGG_PYRUVATE_METABOLISM	0.103381488709149	0.374716183409787
CESC	ACSS1	KEGG_PROPANOATE_METABOLISM	0.749252730812793	0.892613851800604
CESC	KIDINS220	KEGG_NEUROTROPHIN_SIGNALING_PATHWAY	0.83325286927398	0.933389821547041
CESC	RXFP2	KEGG_NEUROACTIVE_LIGAND_RECEPTOR_INTERACTION	0.564985126714247	0.795115119536225
CESC	CUL4A	KEGG_NUCLEOTIDE_EXCISION_REPAIR	0.987357913580091	0.9970219360188
CESC	CUL4A	KEGG_UBIQUITIN_MEDIATED_PROTEOLYSIS	0.126031813384065	0.410787430321656
CESC	COL6A6	KEGG_FOCAL_ADHESION	0.76068654726185	0.898220151093824
CESC	COL6A6	KEGG_ECM_RECEPTOR_INTERACTION	0.187279411401755	0.485672282454485
CESC	PLXNC1	KEGG_AXON_GUIDANCE	0.532595123895353	0.775165549346355
CESC	PHKA2	KEGG_CALCIUM_SIGNALING_PATHWAY	0.141799268725741	0.431741109904004
CESC	PHKA2	KEGG_INSULIN_SIGNALING_PATHWAY	0.0263329531460916	0.203626661446686
CESC	CTNNA2	KEGG_ADHERENS_JUNCTION	0.0120102914974551	0.143572264668977
CESC	CTNNA2	KEGG_TIGHT_JUNCTION	0.850232394887582	0.941024384425038
CESC	CTNNA2	KEGG_LEUKOCYTE_TRANSENDOTHELIAL_MIGRATION	0.127038455308283	0.411993417871764
COAD	HLA-B	KEGG_ENDOCYTOSIS	0.0433005801162208	0.256583425464982
COAD	HLA-B	KEGG_CELL_ADHESION_MOLECULES_CAMS	0.164621556897861	0.460934792625868
COAD	HLA-B	KEGG_ANTIGEN_PROCESSING_AND_PRESENTATION	0.708837117640039	0.872431753299858
COAD	HLA-B	KEGG_NATURAL_KILLER_CELL_MEDIATED_CYTOTOXICITY	0.475608962000163	0.73270094884684
COAD	MYH2	KEGG_TIGHT_JUNCTION	0.544421731595856	0.782926034313077
COAD	APC	KEGG_WNT_SIGNALING_PATHWAY	0.00215791076907761	0.0595765730921962
COAD	APC	KEGG_REGULATION_OF_ACTIN_CYTOSKELETON	0.0316433901986107	0.224087331890595
COAD	LRP6	KEGG_WNT_SIGNALING_PATHWAY	0.501151353058746	0.750479872476538
COAD	VANGL2	KEGG_WNT_SIGNALING_PATHWAY	0.637453807750499	0.835233582320223
COAD	ENPP1	KEGG_PURINE_METABOLISM	0.0817089308692983	0.34106866756814
COAD	ENPP1	KEGG_STARCH_AND_SUCROSE_METABOLISM	0.0423509584338169	0.254844117342678
COAD	ENPP1	KEGG_RIBOFLAVIN_METABOLISM	0.106557997784567	0.379583226428266
COAD	ENPP1	KEGG_NICOTINATE_AND_NICOTINAMIDE_METABOLISM	0.49913797507547	0.748477860115465
COAD	ENPP1	KEGG_PANTOTHENATE_AND_COA_BIOSYNTHESIS	0.303398348850946	0.601278582043788
COAD	ARAP2	KEGG_ENDOCYTOSIS	0.601951487259083	0.816119314791295
COAD	PTPRC	KEGG_CELL_ADHESION_MOLECULES_CAMS	0.910784936898951	0.964748636252912
COAD	PTPRC	KEGG_T_CELL_RECEPTOR_SIGNALING_PATHWAY	0.14588501986552	0.437455308338477
COAD	PTPRC	KEGG_FC_GAMMA_R_MEDIATED_PHAGOCYTOSIS	0.180714573238494	0.477665461788155
COAD	SEMA3D	KEGG_AXON_GUIDANCE	0.435040297778114	0.706027582384338
COAD	GRIA4	KEGG_NEUROACTIVE_LIGAND_RECEPTOR_INTERACTION	0.393914421011137	0.677087906055797
COAD	NLGN1	KEGG_CELL_ADHESION_MOLECULES_CAMS	0.347795841288162	0.640679878282687
COAD	PLAT	KEGG_COMPLEMENT_AND_COAGULATION_CASCADES	0.934061495654742	0.975776670103616
COAD	TP53	KEGG_MAPK_SIGNALING_PATHWAY	7.71583370317838e-11	1.99007595065398e-08
COAD	TP53	KEGG_CELL_CYCLE	3.83429441050743e-05	0.00282555785844987
COAD	TP53	KEGG_P53_SIGNALING_PATHWAY	1.19787736367035e-12	4.0484124280459e-10
COAD	TP53	KEGG_APOPTOSIS	0.000129917278471232	0.00781177451715672
COAD	TP53	KEGG_WNT_SIGNALING_PATHWAY	8.30231725054514e-08	1.21449270705363e-05
COAD	TP53	KEGG_NEUROTROPHIN_SIGNALING_PATHWAY	0.0332259823586063	0.22900692904128
COAD	F5	KEGG_COMPLEMENT_AND_COAGULATION_CASCADES	0.0174181880974654	0.166227518542608
COAD	PLK1	KEGG_CELL_CYCLE	0.043479763009143	0.256797210918594
COAD	PLK1	KEGG_OOCYTE_MEIOSIS	0.204012363015321	0.505781674201025
COAD	PLK1	KEGG_PROGESTERONE_MEDIATED_OOCYTE_MATURATION	0.0526673727784803	0.279610656945827
COAD	EPHB1	KEGG_AXON_GUIDANCE	0.952714881939002	0.983729304454715
COAD	NTRK3	KEGG_NEUROTROPHIN_SIGNALING_PATHWAY	0.136569582055277	0.423879868865948
COAD	SMAD4	KEGG_CELL_CYCLE	2.1666028577229e-05	0.00172641256980017
COAD	SMAD4	KEGG_WNT_SIGNALING_PATHWAY	8.94424002445777e-06	0.000775774305130182
COAD	SMAD4	KEGG_TGF_BETA_SIGNALING_PATHWAY	0.00405967725139761	0.0846572271083999
COAD	SMAD4	KEGG_ADHERENS_JUNCTION	0.001237509043249	0.0422607182330434
COAD	RYR2	KEGG_CALCIUM_SIGNALING_PATHWAY	0.0624340576452995	0.303298371102074
COAD	MGAM	KEGG_GALACTOSE_METABOLISM	0.805031379011603	0.920022451689916
COAD	MGAM	KEGG_STARCH_AND_SUCROSE_METABOLISM	0.001634914844928	0.0499183812932689
COAD	DUSP16	KEGG_MAPK_SIGNALING_PATHWAY	0.2844023846357	0.584894907140596
COAD	CACNA1F	KEGG_MAPK_SIGNALING_PATHWAY	0.720468768995506	0.877589490550654
COAD	CACNA1F	KEGG_CALCIUM_SIGNALING_PATHWAY	0.0877785916202162	0.351045804809574
COAD	CACNA1F	KEGG_GNRH_SIGNALING_PATHWAY	0.838654332133937	0.935527737780348
COAD	TNFSF13B	KEGG_CYTOKINE_CYTOKINE_RECEPTOR_INTERACTION	0.707936849345167	0.872107725041727
COAD	TNFSF13B	KEGG_INTESTINAL_IMMUNE_NETWORK_FOR_IGA_PRODUCTION	0.0446490813445746	0.259245051100815
COAD	DHODH	KEGG_PYRIMIDINE_METABOLISM	0.492039789902422	0.744798682598903
COAD	EP300	KEGG_CELL_CYCLE	0.107506416695978	0.381764634071478
COAD	EP300	KEGG_WNT_SIGNALING_PATHWAY	0.327711708439903	0.622341107231058
COAD	EP300	KEGG_NOTCH_SIGNALING_PATHWAY	0.87737421778369	0.953068482807871
COAD	EP300	KEGG_TGF_BETA_SIGNALING_PATHWAY	0.290711750665086	0.591899311646858
COAD	EP300	KEGG_ADHERENS_JUNCTION	0.0212439362363724	0.184441378360244
COAD	EP300	KEGG_JAK_STAT_SIGNALING_PATHWAY	0.101136811073687	0.370280868633996
COAD	EP300	KEGG_LONG_TERM_POTENTIATION	0.0294862407719799	0.216606333016765
COAD	EP300	KEGG_MELANOGENESIS	0.0093100621019184	0.129246343712326
COAD	MYH15	KEGG_TIGHT_JUNCTION	0.265204034946664	0.568145299784099
COAD	FYN	KEGG_AXON_GUIDANCE	0.609852071353101	0.820875350250248
COAD	FYN	KEGG_FOCAL_ADHESION	0.55251243127153	0.7875471697051
COAD	FYN	KEGG_ADHERENS_JUNCTION	0.0109623028162818	0.139353475878571
COAD	FYN	KEGG_NATURAL_KILLER_CELL_MEDIATED_CYTOTOXICITY	0.0529511481430372	0.27995670632342
COAD	FYN	KEGG_T_CELL_RECEPTOR_SIGNALING_PATHWAY	0.0950926981770928	0.360822119563951
COAD	FYN	KEGG_FC_EPSILON_RI_SIGNALING_PATHWAY	0.222650792032432	0.526454637258025
COAD	CACNA1C	KEGG_MAPK_SIGNALING_PATHWAY	0.866227311830563	0.949652559647802
COAD	CACNA1C	KEGG_CALCIUM_SIGNALING_PATHWAY	0.0425833846623842	0.254882413544282
COAD	CACNA1C	KEGG_LONG_TERM_POTENTIATION	0.0193196668847171	0.176575134608278
COAD	CACNA1C	KEGG_GNRH_SIGNALING_PATHWAY	0.315879227333462	0.612219497426098
COAD	CUL3	KEGG_UBIQUITIN_MEDIATED_PROTEOLYSIS	0.274197202568128	0.57699409746467
COAD	COL11A2	KEGG_FOCAL_ADHESION	0.993746712227156	0.998705990410052
COAD	COL11A2	KEGG_ECM_RECEPTOR_INTERACTION	0.88162396390945	0.954573184962055
COAD	CLCA2	KEGG_OLFACTORY_TRANSDUCTION	0.408209394624409	0.687281143803345
COAD	CACNA1E	KEGG_MAPK_SIGNALING_PATHWAY	0.308097940050969	0.605386509711216
COAD	CACNA1E	KEGG_CALCIUM_SIGNALING_PATHWAY	0.0235261888352979	0.191511774729863
COAD	ATP2A2	KEGG_CALCIUM_SIGNALING_PATHWAY	0.0115751112032227	0.142140755132982
COAD	FASN	KEGG_INSULIN_SIGNALING_PATHWAY	0.617974638727582	0.824835821077084
COAD	FBXW7	KEGG_UBIQUITIN_MEDIATED_PROTEOLYSIS	0.479353312898369	0.735233461614541
COAD	LAMA2	KEGG_FOCAL_ADHESION	0.471292812826227	0.728801019013861
COAD	LAMA2	KEGG_ECM_RECEPTOR_INTERACTION	0.896394405602578	0.959391405976405
COAD	NPR2	KEGG_PURINE_METABOLISM	0.743520099567115	0.889338600910092
COAD	MAGI1	KEGG_TIGHT_JUNCTION	0.838238191286407	0.935454932001167
COAD	C5	KEGG_COMPLEMENT_AND_COAGULATION_CASCADES	0.700309989111936	0.866633611526021
COAD	CTNNA2	KEGG_ADHERENS_JUNCTION	0.107721055914832	0.381835106336806
COAD	CTNNA2	KEGG_TIGHT_JUNCTION	0.282921123634324	0.583422797189253
COAD	CTNNA2	KEGG_LEUKOCYTE_TRANSENDOTHELIAL_MIGRATION	0.926706626526518	0.972342537906691
COAD	EPHA3	KEGG_AXON_GUIDANCE	0.899166250268391	0.960521139682195
COAD	CDH2	KEGG_CELL_ADHESION_MOLECULES_CAMS	0.622140831370462	0.827638181756541
COAD	WBSCR17	KEGG_O_GLYCAN_BIOSYNTHESIS	0.972613740778135	0.991016454243321
COAD	CFH	KEGG_COMPLEMENT_AND_COAGULATION_CASCADES	0.98564996058349	0.996607972780024
COAD	ELMO1	KEGG_CHEMOKINE_SIGNALING_PATHWAY	0.593562564461989	0.81126469916057
COAD	NFASC	KEGG_CELL_ADHESION_MOLECULES_CAMS	0.743405749765514	0.889310356823118
COAD	KDR	KEGG_CYTOKINE_CYTOKINE_RECEPTOR_INTERACTION	0.0040406640561839	0.0846572271083999
COAD	KDR	KEGG_ENDOCYTOSIS	0.0560337744281133	0.286931569054304
COAD	KDR	KEGG_VEGF_SIGNALING_PATHWAY	0.339560488883871	0.632170882776726
COAD	KDR	KEGG_FOCAL_ADHESION	0.952227407976041	0.983423148880013
COAD	RPTOR	KEGG_MTOR_SIGNALING_PATHWAY	0.69281624719348	0.862587911425724
COAD	RPTOR	KEGG_INSULIN_SIGNALING_PATHWAY	0.275928002216235	0.57852137264007
COAD	PIK3CD	KEGG_INOSITOL_PHOSPHATE_METABOLISM	0.221717774415254	0.525399170379157
COAD	PIK3CD	KEGG_ERBB_SIGNALING_PATHWAY	0.422652306560143	0.696907008175633
COAD	PIK3CD	KEGG_CHEMOKINE_SIGNALING_PATHWAY	0.199361199699514	0.500368532203569
COAD	PIK3CD	KEGG_PHOSPHATIDYLINOSITOL_SIGNALING_SYSTEM	0.0466863810101247	0.264526393586756
COAD	PIK3CD	KEGG_MTOR_SIGNALING_PATHWAY	0.254481770866831	0.557513659599688
COAD	PIK3CD	KEGG_APOPTOSIS	0.460296870047709	0.723540648624563
COAD	PIK3CD	KEGG_VEGF_SIGNALING_PATHWAY	0.332481656771269	0.625701366746392
COAD	PIK3CD	KEGG_FOCAL_ADHESION	0.743269511944881	0.889310356823118
COAD	PIK3CD	KEGG_TOLL_LIKE_RECEPTOR_SIGNALING_PATHWAY	0.0468006907754755	0.264526393586756
COAD	PIK3CD	KEGG_JAK_STAT_SIGNALING_PATHWAY	0.0197910167393452	0.178446876782265
COAD	PIK3CD	KEGG_NATURAL_KILLER_CELL_MEDIATED_CYTOTOXICITY	0.0364140727484088	0.237627213660747
COAD	PIK3CD	KEGG_T_CELL_RECEPTOR_SIGNALING_PATHWAY	0.2096973272208	0.512172616258286
COAD	PIK3CD	KEGG_B_CELL_RECEPTOR_SIGNALING_PATHWAY	0.667966133010665	0.852066173602486
COAD	PIK3CD	KEGG_FC_EPSILON_RI_SIGNALING_PATHWAY	0.0225304622090915	0.187072815726328
COAD	PIK3CD	KEGG_FC_GAMMA_R_MEDIATED_PHAGOCYTOSIS	0.0134337163949485	0.149109687867373
COAD	PIK3CD	KEGG_LEUKOCYTE_TRANSENDOTHELIAL_MIGRATION	0.290628544207603	0.591899311646858
COAD	PIK3CD	KEGG_NEUROTROPHIN_SIGNALING_PATHWAY	0.209321622350644	0.511866572020624
COAD	PIK3CD	KEGG_REGULATION_OF_ACTIN_CYTOSKELETON	0.499966166440908	0.749605078367346
COAD	PIK3CD	KEGG_INSULIN_SIGNALING_PATHWAY	0.604502050893568	0.817428890839937
COAD	PIK3CD	KEGG_PROGESTERONE_MEDIATED_OOCYTE_MATURATION	0.142501157802428	0.432614825490478
COAD	PIK3CD	KEGG_ALDOSTERONE_REGULATED_SODIUM_REABSORPTION	0.0164895476955351	0.163470357264878
COAD	VCAN	KEGG_CELL_ADHESION_MOLECULES_CAMS	0.877458446503011	0.953068482807871
COAD	DGKZ	KEGG_GLYCEROLIPID_METABOLISM	0.99026138542289	0.997897577475812
COAD	DGKZ	KEGG_GLYCEROPHOSPHOLIPID_METABOLISM	0.624719387853498	0.829044891368935
COAD	DGKZ	KEGG_PHOSPHATIDYLINOSITOL_SIGNALING_SYSTEM	0.016956419868858	0.164381672734597
COAD	ITPR2	KEGG_CALCIUM_SIGNALING_PATHWAY	0.000654843784850229	0.0274804541262194
COAD	ITPR2	KEGG_PHOSPHATIDYLINOSITOL_SIGNALING_SYSTEM	0.00156538948152651	0.048455166628378
COAD	ITPR2	KEGG_OOCYTE_MEIOSIS	0.8371993680973	0.934980743701189
COAD	ITPR2	KEGG_GAP_JUNCTION	0.223305376373122	0.526560603770407
COAD	ITPR2	KEGG_LONG_TERM_POTENTIATION	0.00303543975432726	0.0727392299074853
COAD	ITPR2	KEGG_GNRH_SIGNALING_PATHWAY	0.347911973216313	0.640679878282687
COAD	CHD8	KEGG_WNT_SIGNALING_PATHWAY	0.305442218951235	0.602827061607139
COAD	GABRA5	KEGG_NEUROACTIVE_LIGAND_RECEPTOR_INTERACTION	0.171077611844429	0.468410105860696
COAD	ACVR2A	KEGG_CYTOKINE_CYTOKINE_RECEPTOR_INTERACTION	0.227904866864221	0.53230456974894
COAD	ACVR2A	KEGG_TGF_BETA_SIGNALING_PATHWAY	0.070603900285773	0.321389290560689
COAD	GABRB3	KEGG_NEUROACTIVE_LIGAND_RECEPTOR_INTERACTION	0.696449762766376	0.864684861535696
COAD	CTNNA1	KEGG_ADHERENS_JUNCTION	0.0307390249359555	0.21974703384194
COAD	CTNNA1	KEGG_TIGHT_JUNCTION	0.334914654729587	0.627989005357697
COAD	CTNNA1	KEGG_LEUKOCYTE_TRANSENDOTHELIAL_MIGRATION	0.590579704666242	0.809548487473264
COAD	WHSC1L1	KEGG_LYSINE_DEGRADATION	0.435040297778114	0.706027582384338
COAD	LMO7	KEGG_ADHERENS_JUNCTION	0.819779537501846	0.927789751392101
COAD	VAV3	KEGG_CHEMOKINE_SIGNALING_PATHWAY	0.523229531823832	0.76884147547307
COAD	VAV3	KEGG_FOCAL_ADHESION	0.715228426099007	0.874755632965898
COAD	VAV3	KEGG_NATURAL_KILLER_CELL_MEDIATED_CYTOTOXICITY	0.0878669681813245	0.351073850446458
COAD	VAV3	KEGG_T_CELL_RECEPTOR_SIGNALING_PATHWAY	0.181588052617109	0.478813315054925
COAD	VAV3	KEGG_B_CELL_RECEPTOR_SIGNALING_PATHWAY	0.0305478710239693	0.219179856446503
COAD	VAV3	KEGG_FC_EPSILON_RI_SIGNALING_PATHWAY	0.64741132494189	0.840764628289895
COAD	VAV3	KEGG_FC_GAMMA_R_MEDIATED_PHAGOCYTOSIS	0.00402100246719159	0.0846572271083999
COAD	VAV3	KEGG_LEUKOCYTE_TRANSENDOTHELIAL_MIGRATION	0.218814471308817	0.522054681912784
COAD	VAV3	KEGG_REGULATION_OF_ACTIN_CYTOSKELETON	0.331729635485389	0.625006181736312
COAD	ITGA10	KEGG_FOCAL_ADHESION	0.760992232516201	0.898220151093824
COAD	ITGA10	KEGG_ECM_RECEPTOR_INTERACTION	0.0754096493436891	0.329590397492799
COAD	ITGA10	KEGG_REGULATION_OF_ACTIN_CYTOSKELETON	0.000979115700684893	0.036212501820425
COAD	ROCK2	KEGG_CHEMOKINE_SIGNALING_PATHWAY	0.159448325359457	0.455613130276396
COAD	ROCK2	KEGG_WNT_SIGNALING_PATHWAY	0.405434377240186	0.68511419505708
COAD	ROCK2	KEGG_TGF_BETA_SIGNALING_PATHWAY	0.438293585986339	0.707882756245566
COAD	ROCK2	KEGG_AXON_GUIDANCE	0.588255794877606	0.808171438967678
COAD	ROCK2	KEGG_FOCAL_ADHESION	0.453721720318722	0.719287390310916
COAD	ROCK2	KEGG_LEUKOCYTE_TRANSENDOTHELIAL_MIGRATION	0.890196225508229	0.957671432344397
COAD	ROCK2	KEGG_REGULATION_OF_ACTIN_CYTOSKELETON	0.634657807222107	0.833929637831327
COAD	LTBP1	KEGG_TGF_BETA_SIGNALING_PATHWAY	0.975459377000766	0.992284891389562
COAD	MSH2	KEGG_MISMATCH_REPAIR	0.265204034946664	0.568145299784099
COAD	LRP2	KEGG_HEDGEHOG_SIGNALING_PATHWAY	0.305265815045397	0.602827061607139
COAD	ATIC	KEGG_PURINE_METABOLISM	0.535813777785879	0.777195624697262
COAD	ATIC	KEGG_ONE_CARBON_POOL_BY_FOLATE	0.70095376947066	0.867101842052498
COAD	KAT2B	KEGG_NOTCH_SIGNALING_PATHWAY	0.206724840725504	0.509328849660801
COAD	EPHA6	KEGG_AXON_GUIDANCE	0.449213860538498	0.716009927978178
COAD	STAG1	KEGG_CELL_CYCLE	0.790793918189803	0.914006446599165
COAD	GUCY1A3	KEGG_PURINE_METABOLISM	0.409419779966375	0.687463296804941
COAD	GUCY1A3	KEGG_GAP_JUNCTION	0.11928733321351	0.400937981078742
COAD	PIK3R1	KEGG_ERBB_SIGNALING_PATHWAY	0.0931475726088692	0.358015434956677
COAD	PIK3R1	KEGG_CHEMOKINE_SIGNALING_PATHWAY	0.915954859903223	0.968127768814234
COAD	PIK3R1	KEGG_PHOSPHATIDYLINOSITOL_SIGNALING_SYSTEM	0.00627764659737936	0.105928614270582
COAD	PIK3R1	KEGG_MTOR_SIGNALING_PATHWAY	0.0765856441698643	0.331859245673565
COAD	PIK3R1	KEGG_APOPTOSIS	0.00696051637885226	0.112203981955808
COAD	PIK3R1	KEGG_VEGF_SIGNALING_PATHWAY	0.84863601147076	0.940766405642644
COAD	PIK3R1	KEGG_FOCAL_ADHESION	0.121437079055127	0.404595826367511
COAD	PIK3R1	KEGG_TOLL_LIKE_RECEPTOR_SIGNALING_PATHWAY	0.0644004355847031	0.307896911788134
COAD	PIK3R1	KEGG_JAK_STAT_SIGNALING_PATHWAY	0.00168586249810983	0.050857678709588
COAD	PIK3R1	KEGG_NATURAL_KILLER_CELL_MEDIATED_CYTOTOXICITY	0.00547691602638078	0.0970168352940488
COAD	PIK3R1	KEGG_T_CELL_RECEPTOR_SIGNALING_PATHWAY	0.256797118932675	0.559380718487582
COAD	PIK3R1	KEGG_B_CELL_RECEPTOR_SIGNALING_PATHWAY	0.0512454799788376	0.276117069418685
COAD	PIK3R1	KEGG_FC_EPSILON_RI_SIGNALING_PATHWAY	0.182192174862759	0.479411603974864
COAD	PIK3R1	KEGG_FC_GAMMA_R_MEDIATED_PHAGOCYTOSIS	0.000500952561640389	0.0228364467750579
COAD	PIK3R1	KEGG_LEUKOCYTE_TRANSENDOTHELIAL_MIGRATION	0.95009801693141	0.982372683188601
COAD	PIK3R1	KEGG_NEUROTROPHIN_SIGNALING_PATHWAY	0.114335585673442	0.391892279220281
COAD	PIK3R1	KEGG_REGULATION_OF_ACTIN_CYTOSKELETON	0.44495062909734	0.712628628454077
COAD	PIK3R1	KEGG_INSULIN_SIGNALING_PATHWAY	0.0788687536801934	0.335749290093249
COAD	PIK3R1	KEGG_PROGESTERONE_MEDIATED_OOCYTE_MATURATION	0.400984278678959	0.682631100774717
COAD	PIK3R1	KEGG_ALDOSTERONE_REGULATED_SODIUM_REABSORPTION	0.0216701095771905	0.186305915759688
COAD	DOCK2	KEGG_CHEMOKINE_SIGNALING_PATHWAY	0.0173377937129501	0.16606736340526
COAD	DOCK2	KEGG_FC_GAMMA_R_MEDIATED_PHAGOCYTOSIS	0.0229268413571996	0.188839642410684
COAD	PLG	KEGG_NEUROACTIVE_LIGAND_RECEPTOR_INTERACTION	0.0472817714860322	0.265005833497286
COAD	PLG	KEGG_COMPLEMENT_AND_COAGULATION_CASCADES	0.165107909423086	0.461821524045567
COAD	ABCA13	KEGG_ABC_TRANSPORTERS	0.610953378035467	0.821646500705523
COAD	SEMA3C	KEGG_AXON_GUIDANCE	0.467116450811338	0.725548072012983
COAD	PEX1	KEGG_PEROXISOME	0.370409466801017	0.65815503700449
COAD	PPP1R3A	KEGG_INSULIN_SIGNALING_PATHWAY	0.201598199637484	0.502380868204165
COAD	UNC5D	KEGG_AXON_GUIDANCE	0.51035153449735	0.75764244011035
COAD	GLDC	KEGG_GLYCINE_SERINE_AND_THREONINE_METABOLISM	0.107844973138978	0.38185580058096
COAD	ATM	KEGG_CELL_CYCLE	0.874986897927222	0.952821163519814
COAD	ATM	KEGG_P53_SIGNALING_PATHWAY	0.33345601445906	0.626335758024877
COAD	ATM	KEGG_APOPTOSIS	0.104010183175859	0.37531454663481
COAD	BRCA2	KEGG_HOMOLOGOUS_RECOMBINATION	0.814930310300639	0.924734694417004
COAD	RYR3	KEGG_CALCIUM_SIGNALING_PATHWAY	0.97417304815048	0.991986498173803
COAD	GUCY2D	KEGG_PURINE_METABOLISM	0.0192707382772281	0.176575134608278
COAD	GUCY2D	KEGG_OLFACTORY_TRANSDUCTION	0.0956667646977394	0.362015939026256
COAD	NF1	KEGG_MAPK_SIGNALING_PATHWAY	0.776272429222557	0.906283034998247
COAD	ROCK1	KEGG_CHEMOKINE_SIGNALING_PATHWAY	0.205040073217791	0.506962098286471
COAD	ROCK1	KEGG_WNT_SIGNALING_PATHWAY	0.676480834087579	0.856027473338872
COAD	ROCK1	KEGG_TGF_BETA_SIGNALING_PATHWAY	0.988861326323113	0.997409679869593
COAD	ROCK1	KEGG_AXON_GUIDANCE	0.874689792884879	0.952821163519814
COAD	ROCK1	KEGG_FOCAL_ADHESION	0.817215890509732	0.926080235057026
COAD	ROCK1	KEGG_LEUKOCYTE_TRANSENDOTHELIAL_MIGRATION	0.241123739468364	0.54440308005746
COAD	ROCK1	KEGG_REGULATION_OF_ACTIN_CYTOSKELETON	0.219049460026103	0.522106944969804
COAD	RAPGEF4	KEGG_LEUKOCYTE_TRANSENDOTHELIAL_MIGRATION	0.814930310300639	0.924734694417004
COAD	B2M	KEGG_ANTIGEN_PROCESSING_AND_PRESENTATION	0.30268438246879	0.601278582043788
COAD	MAP3K1	KEGG_MAPK_SIGNALING_PATHWAY	0.460901246990701	0.723606623190898
COAD	MAP3K1	KEGG_UBIQUITIN_MEDIATED_PROTEOLYSIS	0.0106846561950557	0.138335951608641
COAD	MAP3K1	KEGG_RIG_I_LIKE_RECEPTOR_SIGNALING_PATHWAY	0.0698839560985262	0.319315922480958
COAD	MAP3K1	KEGG_NEUROTROPHIN_SIGNALING_PATHWAY	0.189626919329013	0.487375725280942
COAD	MAP3K1	KEGG_GNRH_SIGNALING_PATHWAY	0.692488936120248	0.862399499735013
COAD	DGKI	KEGG_GLYCEROLIPID_METABOLISM	0.480921436895102	0.736893558460679
COAD	DGKI	KEGG_GLYCEROPHOSPHOLIPID_METABOLISM	0.895517676057368	0.958707672642082
COAD	DGKI	KEGG_PHOSPHATIDYLINOSITOL_SIGNALING_SYSTEM	0.0525549570865433	0.27938790779582
COAD	UBR5	KEGG_UBIQUITIN_MEDIATED_PROTEOLYSIS	0.178581110826586	0.475488581149516
COAD	COL5A1	KEGG_FOCAL_ADHESION	0.73842695237848	0.886698528956137
COAD	COL5A1	KEGG_ECM_RECEPTOR_INTERACTION	0.676700185693308	0.856027473338872
COAD	CCKBR	KEGG_CALCIUM_SIGNALING_PATHWAY	0.145202470480155	0.436591231785556
COAD	CCKBR	KEGG_NEUROACTIVE_LIGAND_RECEPTOR_INTERACTION	0.0802722021231649	0.337797663833517
COAD	SUV420H1	KEGG_LYSINE_DEGRADATION	0.894116691746437	0.958707672642082
COAD	LAMA3	KEGG_FOCAL_ADHESION	0.860507792442599	0.946346148309012
COAD	LAMA3	KEGG_ECM_RECEPTOR_INTERACTION	0.756038768270105	0.895491510392029
COAD	ASAP2	KEGG_ENDOCYTOSIS	0.577898886298058	0.801583213219256
COAD	ASAP2	KEGG_FC_GAMMA_R_MEDIATED_PHAGOCYTOSIS	0.0855181506290391	0.346834460345225
COAD	CTNND1	KEGG_ADHERENS_JUNCTION	0.0134043529813758	0.148952453027737
COAD	CTNND1	KEGG_LEUKOCYTE_TRANSENDOTHELIAL_MIGRATION	0.0302827457424656	0.218705493222033
COAD	SMAD2	KEGG_CELL_CYCLE	0.534495447456356	0.776439287211837
COAD	SMAD2	KEGG_WNT_SIGNALING_PATHWAY	0.135497620680919	0.423086836524521
COAD	SMAD2	KEGG_TGF_BETA_SIGNALING_PATHWAY	0.516801825365023	0.762597815477656
COAD	SMAD2	KEGG_ADHERENS_JUNCTION	0.0222178852745529	0.186755997921006
COAD	ABCA12	KEGG_ABC_TRANSPORTERS	0.633498329669876	0.833502232453736
COAD	SRGAP3	KEGG_AXON_GUIDANCE	0.899855107073811	0.960832324265216
COAD	AGL	KEGG_STARCH_AND_SUCROSE_METABOLISM	0.452160505330659	0.718353130830056
COAD	XRN1	KEGG_RNA_DEGRADATION	0.236617437531582	0.538908809034826
COAD	PRKDC	KEGG_NON_HOMOLOGOUS_END_JOINING	0.16110232159181	0.457597340787725
COAD	PRKDC	KEGG_CELL_CYCLE	0.121604458945945	0.404595826367511
COAD	SRGAP1	KEGG_AXON_GUIDANCE	0.433418281124398	0.705168089857275
COAD	COL4A1	KEGG_FOCAL_ADHESION	0.743211162346728	0.889310356823118
COAD	COL4A1	KEGG_ECM_RECEPTOR_INTERACTION	0.864337285953252	0.94876502296412
COAD	GABRG3	KEGG_NEUROACTIVE_LIGAND_RECEPTOR_INTERACTION	0.642618524667989	0.837319586277618
COAD	NEDD4L	KEGG_UBIQUITIN_MEDIATED_PROTEOLYSIS	0.426997571900253	0.700189654750394
COAD	NEDD4L	KEGG_ENDOCYTOSIS	0.0261523161589826	0.203072023945186
COAD	NEDD4L	KEGG_ALDOSTERONE_REGULATED_SODIUM_REABSORPTION	0.00545903677454872	0.0970168352940488
COAD	PRPF6	KEGG_SPLICEOSOME	0.0486596255516677	0.268683374665856
COAD	SMC1A	KEGG_CELL_CYCLE	0.036576683648143	0.23792215979999
COAD	SMC1A	KEGG_OOCYTE_MEIOSIS	0.105036245980976	0.377388824799631
COAD	ITGA4	KEGG_FOCAL_ADHESION	0.0395450407753285	0.245754270573632
COAD	ITGA4	KEGG_ECM_RECEPTOR_INTERACTION	0.190441007400346	0.487849533071299
COAD	ITGA4	KEGG_CELL_ADHESION_MOLECULES_CAMS	0.454955983688842	0.719441067409162
COAD	ITGA4	KEGG_HEMATOPOIETIC_CELL_LINEAGE	0.6983857740321	0.865673323800255
COAD	ITGA4	KEGG_LEUKOCYTE_TRANSENDOTHELIAL_MIGRATION	0.653000863038369	0.843667474115351
COAD	ITGA4	KEGG_INTESTINAL_IMMUNE_NETWORK_FOR_IGA_PRODUCTION	0.369193629434452	0.656879526759708
COAD	ITGA4	KEGG_REGULATION_OF_ACTIN_CYTOSKELETON	0.410975421136638	0.688027120407763
COAD	ARHGAP5	KEGG_FOCAL_ADHESION	0.619265170546619	0.826108334902329
COAD	ARHGAP5	KEGG_LEUKOCYTE_TRANSENDOTHELIAL_MIGRATION	0.26641973278971	0.568636716261313
COAD	NAGPA	KEGG_LYSOSOME	0.378145849832685	0.66490788294636
COAD	HGF	KEGG_CYTOKINE_CYTOKINE_RECEPTOR_INTERACTION	0.362449495165593	0.65268930294823
COAD	HGF	KEGG_FOCAL_ADHESION	0.109509879398372	0.384118300885882
COAD	BRAF	KEGG_MAPK_SIGNALING_PATHWAY	0.200883035620368	0.501703554348428
COAD	BRAF	KEGG_ERBB_SIGNALING_PATHWAY	0.0759164120259098	0.330691890784863
COAD	BRAF	KEGG_CHEMOKINE_SIGNALING_PATHWAY	0.375883710607019	0.663129815109179
COAD	BRAF	KEGG_MTOR_SIGNALING_PATHWAY	0.0340874239191216	0.231127541577506
COAD	BRAF	KEGG_FOCAL_ADHESION	0.000156699704991319	0.0093647183452434
COAD	BRAF	KEGG_NATURAL_KILLER_CELL_MEDIATED_CYTOTOXICITY	1.3122600518965e-09	2.73648101460374e-07
COAD	BRAF	KEGG_LONG_TERM_POTENTIATION	3.25533230783701e-09	6.25598273511971e-07
COAD	BRAF	KEGG_NEUROTROPHIN_SIGNALING_PATHWAY	0.00613134842807998	0.103967726546041
COAD	BRAF	KEGG_REGULATION_OF_ACTIN_CYTOSKELETON	0.155382486915027	0.449175757783963
COAD	BRAF	KEGG_INSULIN_SIGNALING_PATHWAY	0.16798830999718	0.466009510272008
COAD	BRAF	KEGG_PROGESTERONE_MEDIATED_OOCYTE_MATURATION	0.0148893686244171	0.156962194466836
COAD	KCNB1	KEGG_TASTE_TRANSDUCTION	0.92471903748677	0.971775802829019
COAD	PTEN	KEGG_INOSITOL_PHOSPHATE_METABOLISM	0.794163251317967	0.914510082157832
COAD	PTEN	KEGG_PHOSPHATIDYLINOSITOL_SIGNALING_SYSTEM	0.739451757267282	0.887396433571278
COAD	PTEN	KEGG_P53_SIGNALING_PATHWAY	0.00292404931317544	0.0712900679562997
COAD	PTEN	KEGG_FOCAL_ADHESION	0.0948320272206022	0.360653690234851
COAD	PTEN	KEGG_TIGHT_JUNCTION	0.00525819476149898	0.095836032143453
COAD	BMPR2	KEGG_CYTOKINE_CYTOKINE_RECEPTOR_INTERACTION	0.114713321386945	0.392017176748064
COAD	BMPR2	KEGG_TGF_BETA_SIGNALING_PATHWAY	0.0519302721828315	0.278254253389563
COAD	A2M	KEGG_COMPLEMENT_AND_COAGULATION_CASCADES	0.0798006537263306	0.337265869165832
COAD	MAP3K4	KEGG_MAPK_SIGNALING_PATHWAY	0.40507686009566	0.68511419505708
COAD	MAP3K4	KEGG_GNRH_SIGNALING_PATHWAY	0.21525982249255	0.517727295415942
COAD	OR1C1	KEGG_OLFACTORY_TRANSDUCTION	0.20414981156405	0.505781674201025
COAD	ADCY8	KEGG_PURINE_METABOLISM	0.00755031832322878	0.116720299504677
COAD	ADCY8	KEGG_CALCIUM_SIGNALING_PATHWAY	0.0115309145513726	0.142140755132982
COAD	ADCY8	KEGG_CHEMOKINE_SIGNALING_PATHWAY	0.686452897801144	0.859417266811491
COAD	ADCY8	KEGG_OOCYTE_MEIOSIS	0.352832308997154	0.645658643469778
COAD	ADCY8	KEGG_GAP_JUNCTION	0.800538811942609	0.917884990155535
COAD	ADCY8	KEGG_LONG_TERM_POTENTIATION	0.223485200175278	0.526560603770407
COAD	ADCY8	KEGG_TASTE_TRANSDUCTION	0.000959750247848089	0.0356307279513603
COAD	ADCY8	KEGG_GNRH_SIGNALING_PATHWAY	0.923550045299109	0.970706073021223
COAD	ADCY8	KEGG_PROGESTERONE_MEDIATED_OOCYTE_MATURATION	0.192396558137055	0.490296065080935
COAD	ADCY8	KEGG_MELANOGENESIS	0.153802308708268	0.447437665633781
COAD	EDC4	KEGG_RNA_DEGRADATION	0.494300031602621	0.746643990565469
COAD	ARHGAP35	KEGG_FOCAL_ADHESION	0.166001150543344	0.463203255601075
COAD	ARHGAP35	KEGG_LEUKOCYTE_TRANSENDOTHELIAL_MIGRATION	0.0418469390415781	0.253957801576784
COAD	ARHGAP35	KEGG_REGULATION_OF_ACTIN_CYTOSKELETON	0.0594371309911868	0.295108065270832
COAD	SEMA3F	KEGG_AXON_GUIDANCE	0.627233721602228	0.829465335176951
COAD	GHSR	KEGG_NEUROACTIVE_LIGAND_RECEPTOR_INTERACTION	0.305265815045397	0.602827061607139
COAD	ITPR3	KEGG_CALCIUM_SIGNALING_PATHWAY	0.115303264089866	0.392664104011389
COAD	ITPR3	KEGG_PHOSPHATIDYLINOSITOL_SIGNALING_SYSTEM	0.0160885233733368	0.161743602105874
COAD	ITPR3	KEGG_OOCYTE_MEIOSIS	0.781612548336912	0.910243089572965
COAD	ITPR3	KEGG_GAP_JUNCTION	0.704866043549725	0.869825494612576
COAD	ITPR3	KEGG_LONG_TERM_POTENTIATION	0.0605555299387541	0.298693884715515
COAD	ITPR3	KEGG_TASTE_TRANSDUCTION	0.000951110344290549	0.0355639610521278
COAD	ITPR3	KEGG_GNRH_SIGNALING_PATHWAY	0.462032346298153	0.724272503995624
COAD	INHBA	KEGG_CYTOKINE_CYTOKINE_RECEPTOR_INTERACTION	0.194341499031207	0.493840039410127
COAD	INHBA	KEGG_TGF_BETA_SIGNALING_PATHWAY	0.139314392918929	0.427629303162676
COAD	TAF1L	KEGG_BASAL_TRANSCRIPTION_FACTORS	0.324792113349225	0.619919669510371
COAD	CYP2C19	KEGG_ARACHIDONIC_ACID_METABOLISM	0.341340200155322	0.633627692002264
COAD	CYP2C19	KEGG_LINOLEIC_ACID_METABOLISM	0.111245226141699	0.386636333835033
COAD	CYP2C19	KEGG_RETINOL_METABOLISM	0.00523294911175643	0.095836032143453
COAD	CYP2C19	KEGG_METABOLISM_OF_XENOBIOTICS_BY_CYTOCHROME_P450	0.0768643476814844	0.33208228328648
COAD	CYP2C19	KEGG_DRUG_METABOLISM_CYTOCHROME_P450	0.0538095297424109	0.281405244448129
COAD	ACSS3	KEGG_PROPANOATE_METABOLISM	0.0466724998545677	0.264526393586756
COAD	TAOK2	KEGG_MAPK_SIGNALING_PATHWAY	0.230966569005651	0.534771750744093
COAD	ACE	KEGG_RENIN_ANGIOTENSIN_SYSTEM	0.0888523496335197	0.352780598136314
COAD	MYH7B	KEGG_TIGHT_JUNCTION	0.0127126633485885	0.145501450990923
COAD	RASA1	KEGG_MAPK_SIGNALING_PATHWAY	0.0730651405746984	0.325190230133037
COAD	RASA1	KEGG_AXON_GUIDANCE	0.345523978031265	0.637665031597635
COAD	RELN	KEGG_FOCAL_ADHESION	0.88381559377565	0.955152524112456
COAD	RELN	KEGG_ECM_RECEPTOR_INTERACTION	0.45884607497545	0.722244713659289
COAD	DCC	KEGG_AXON_GUIDANCE	0.589381465766417	0.809403575293371
COAD	TNC	KEGG_FOCAL_ADHESION	0.412447328386477	0.688770875024001
COAD	TNC	KEGG_ECM_RECEPTOR_INTERACTION	0.457070057052542	0.720911430507236
COAD	EPB41L3	KEGG_TIGHT_JUNCTION	0.020469844852329	0.181605691412891
COAD	DYNC1I1	KEGG_VASOPRESSIN_REGULATED_WATER_REABSORPTION	0.474086529384217	0.731537027137241
COAD	STUB1	KEGG_UBIQUITIN_MEDIATED_PROTEOLYSIS	0.0832520030421276	0.343173138739193
COAD	CACNA1B	KEGG_MAPK_SIGNALING_PATHWAY	0.0088772453581746	0.126278493113889
COAD	CACNA1B	KEGG_CALCIUM_SIGNALING_PATHWAY	0.395483728381381	0.6788424597686
COAD	CACNA1B	KEGG_TASTE_TRANSDUCTION	0.016698273557669	0.163823602741455
COAD	INPPL1	KEGG_INOSITOL_PHOSPHATE_METABOLISM	0.916358867272111	0.968327035917408
COAD	INPPL1	KEGG_PHOSPHATIDYLINOSITOL_SIGNALING_SYSTEM	0.696312337043577	0.864684861535696
COAD	NCAM2	KEGG_CELL_ADHESION_MOLECULES_CAMS	0.478540810764335	0.734341978150028
COAD	ROBO1	KEGG_AXON_GUIDANCE	0.357259484296674	0.648520385695467
COAD	GRM3	KEGG_NEUROACTIVE_LIGAND_RECEPTOR_INTERACTION	0.188874714285927	0.487019488217935
COAD	ATP6V0A4	KEGG_OXIDATIVE_PHOSPHORYLATION	0.158785771221447	0.454780638147692
COAD	ATP6V0A4	KEGG_LYSOSOME	0.666426357417542	0.851260864376102
COAD	TRPC1	KEGG_CALCIUM_SIGNALING_PATHWAY	0.0223579130549569	0.186871531996652
COAD	SLIT2	KEGG_AXON_GUIDANCE	0.100191192342709	0.368885753625429
COAD	RASGRF2	KEGG_MAPK_SIGNALING_PATHWAY	0.276062311651038	0.57852137264007
COAD	TLN1	KEGG_FOCAL_ADHESION	0.279136255270203	0.580852322272454
COAD	RASGRF1	KEGG_MAPK_SIGNALING_PATHWAY	0.0878241315572977	0.351045804809574
COAD	RASGRF1	KEGG_FOCAL_ADHESION	0.30752394171944	0.605213385399126
COAD	ACACA	KEGG_PYRUVATE_METABOLISM	0.276800095924586	0.578729507862393
COAD	ACACA	KEGG_PROPANOATE_METABOLISM	0.138989510413529	0.426899464607646
COAD	ACACA	KEGG_INSULIN_SIGNALING_PATHWAY	0.0221553568702602	0.186755997921006
COAD	APAF1	KEGG_P53_SIGNALING_PATHWAY	0.323460768698052	0.61917117381221
COAD	APAF1	KEGG_APOPTOSIS	0.045694118155512	0.262177714731769
COAD	OR6K2	KEGG_OLFACTORY_TRANSDUCTION	0.593562564461989	0.81126469916057
COAD	GNA12	KEGG_MAPK_SIGNALING_PATHWAY	0.898022607643701	0.960375896724294
COAD	GNA12	KEGG_REGULATION_OF_ACTIN_CYTOSKELETON	0.958252274547831	0.98643320479396
COAD	PPP2R1A	KEGG_OOCYTE_MEIOSIS	0.461188699978202	0.723796709125117
COAD	PPP2R1A	KEGG_WNT_SIGNALING_PATHWAY	0.837381135838226	0.935077191791096
COAD	PPP2R1A	KEGG_TGF_BETA_SIGNALING_PATHWAY	0.632436011163148	0.833088662596867
COAD	PPP2R1A	KEGG_TIGHT_JUNCTION	0.0577180686389687	0.291145028682724
COAD	FLT4	KEGG_CYTOKINE_CYTOKINE_RECEPTOR_INTERACTION	0.0130528789372762	0.147195109269848
COAD	FLT4	KEGG_FOCAL_ADHESION	0.0518445542669375	0.278254253389563
COAD	ABCA6	KEGG_ABC_TRANSPORTERS	0.123342445692874	0.406842752403295
COAD	SNRNP200	KEGG_SPLICEOSOME	0.98564996058349	0.996607972780024
COAD	TJP1	KEGG_ADHERENS_JUNCTION	0.086886871647833	0.349724118694214
COAD	TJP1	KEGG_TIGHT_JUNCTION	0.0385760590499076	0.243767862506863
COAD	TJP1	KEGG_GAP_JUNCTION	0.89170667472901	0.957766259618523
COAD	PFKP	KEGG_GLYCOLYSIS_GLUCONEOGENESIS	0.0192929248245047	0.176575134608278
COAD	PFKP	KEGG_PENTOSE_PHOSPHATE_PATHWAY	0.0553148338070625	0.284737755327216
COAD	PFKP	KEGG_FRUCTOSE_AND_MANNOSE_METABOLISM	0.00141369548321994	0.0454417342262292
COAD	PFKP	KEGG_GALACTOSE_METABOLISM	0.877399298958802	0.953068482807871
COAD	RAD50	KEGG_HOMOLOGOUS_RECOMBINATION	0.768585409935832	0.902521885512078
COAD	RAD50	KEGG_NON_HOMOLOGOUS_END_JOINING	0.516972879285429	0.762735389112824
COAD	CYP17A1	KEGG_STEROID_HORMONE_BIOSYNTHESIS	0.0629194381452505	0.304067658312
COAD	PGR	KEGG_OOCYTE_MEIOSIS	0.889050336439225	0.957536521696796
[truncated: 7,802 more rows]
