# Supplementary material for: Somatic mutations in early metazoan genes disrupt regulatory links between unicellular and multicellular genes in cancer
Source: eLife journal article supplement (doi:10.7554/elife.40947), 2019-02-25
Supplement: supp [file elife-40947-supp-v1.zip › elife_poa_e40947_Supplementary_File_6.txt]

Regulator	Regulator_class	Difference_in_median_dependency	p_value	Significant_by
ACTA2	Mixed_downstream	0.016184491	0.0448398486197928	Mutation
ADORA2B	UC_downstream	0.05643005	0.0327149507339391	Mutation
ARHGEF17	UC_downstream	-0.0109976775	0.0402493890577984	Mutation
BCL3	EM_downstream	-0.0087058379	0.0403249167889321	Mutation
BPTF	Mixed_downstream	-0.16098289975	0.025201220637309	Mutation
BRAF	EM_downstream	0.730762005	4.03762178297264e-14	Mutation
CCNT2	UC_downstream	0.18542788185	0.0186319572578448	Mutation
CDK9	UC_downstream	0.01510575	0.0154455823046658	Mutation
CDKN2A	Mixed_downstream	-0.02600058	0.0247191261829549	Mutation
CFD	EM_downstream	0.17549291915	0.0368393040329343	Mutation
CFTR	Mixed_downstream	-0.0031048059	0.0264734550287465	Mutation
CTCF	UC_downstream	-0.00764714999999994	0.0174380240064523	Mutation
CTNNB1	EM_downstream	0.3371331277	0.000204873701364351	Mutation
CYP1B1	EM_downstream	-0.0047456455	0.0358676458038894	Mutation
ERCC4	UC_downstream	0.1684279035	0.0485225032642831	Mutation
FBXW7	UC_downstream	0.01985526	0.0388445047550382	Mutation
GATA2	Mixed_downstream	-0.0020672229	0.0237818889182323	Mutation
GATA6	EM_downstream	0.011673527	0.0383608119192838	Mutation
GLI2	EM_downstream	0.017987304	0.0432823316903907	Mutation
GPR39	UC_downstream	0.03409993	0.0324908173109452	Mutation
HDAC5	UC_downstream	-0.01844933	0.0235953444977778	Mutation
HGF	Mixed_downstream	-0.00211184385	0.0311079686136235	Mutation
HIST1H2BJ	EM_downstream	0.0222000999999999	0.0493536026559446	Mutation
HIST2H3D	EM_downstream	-0.1848786	0.0313340384862642	Mutation
HOXA4	Mixed_downstream	0.009169781	0.0474523832079422	Mutation
IL10	Mixed_downstream	-0.0200308855	0.0225254834713564	Mutation
ITPKA	UC_downstream	0.06336907015	0.0458768692952955	Mutation
JAK2	EM_downstream	-0.0011161647	0.0102787869178249	Mutation
KDM5B	Mixed_downstream	-0.0043401875	0.0108405953389236	Mutation
KHSRP	Mixed_downstream	0.3095525	0.000327106611738694	Mutation
KRAS	Mixed_downstream	0.7274721545	5.90016505986023e-29	Mutation
LDHA	EM_downstream	-0.0054760453	0.0129381377716822	Mutation
MAP2K3	EM_downstream	-0.001993764	0.0172952504050617	Mutation
MAP2K5	Mixed_downstream	-0.0199650459	0.0236907225140402	Mutation
MAPK8	EM_downstream	-0.00043998917	0.0260721300599015	Mutation
MAT2B	Mixed_downstream	0.008149599	0.0129398709723748	Mutation
MLST8	Mixed_downstream	0.149175835	0.011804891457227	Mutation
MTNR1B	EM_downstream	-0.0075557451	0.0330512341512204	Mutation
NEUROD1	UC_downstream	-0.007105613	0.04092200821702	Mutation
NFE2L1	Mixed_downstream	-0.025551904	0.00583525042470345	Mutation
NGF	Mixed_downstream	0.1143161243	0.0373209694487288	Mutation
NRAS	Mixed_downstream	0.903258705	9.94742539635374e-12	Mutation
PIK3CA	Mixed_downstream	0.5950336075	2.531793221675e-11	Mutation
PIK3R1	EM_downstream	0.2366339485	4.26639162275022e-07	Mutation
POU2F1	Mixed_downstream	0.0746283185	0.00949034462599039	Mutation
PPRC1	Mixed_downstream	-0.11383943	0.0286420206797083	Mutation
PROX1	EM_downstream	-0.004615883	0.0205192080604423	Mutation
PTEN	Mixed_downstream	0.00028394151905	5.63423367127988e-10	Mutation
PTGES2	EM_downstream	-0.062714956	0.040465245309386	Mutation
PTGS2	Mixed_downstream	-0.00216722375	0.0124002848971559	Mutation
RB1	Mixed_downstream	0.0032256093	0.00436292908822971	Mutation
RXRG	EM_downstream	0.046429181	0.0403328412475154	Mutation
SF1	Mixed_downstream	-0.00441720000000001	0.021275539315524	Mutation
SHBG	EM_downstream	-0.0397623296	0.013936552976016	Mutation
SLC6A3	EM_downstream	-0.002419271	0.0252108612190325	Mutation
SMARCD3	Mixed_downstream	-0.0028508048	0.0179494448374701	Mutation
SPEN	EM_downstream	-0.0017713825	0.0164651246738872	Mutation
SPHK2	EM_downstream	0.147796652	0.0239858501977326	Mutation
SPP1	EM_downstream	-0.0038422635	0.0225038133404574	Mutation
SPZ1	Mixed_downstream	0.02741348	0.0475104989510751	Mutation
SSRP1	UC_downstream	-0.0450308	0.00233935950179434	Mutation
SUPT7L	Mixed_downstream	0.107737	0.0188922619698655	Mutation
TEK	EM_downstream	-0.00585393185	0.00641003705887401	Mutation
TFAP2A	Mixed_downstream	-0.009172578	0.00375804412742054	Mutation
TFDP1	Mixed_downstream	-0.28038427	0.0294264052216797	Mutation
TLX2	Mixed_downstream	0.14420030885	0.00442494188754281	Mutation
TNFSF11	EM_downstream	0.01353064	0.0209085682724952	Mutation
TP53	Mixed_downstream	0.0497197699998522	2.82224220000654e-26	Mutation
TRAP1	Mixed_downstream	-0.0159024175	0.0264592132895375	Mutation
USF2	EM_downstream	0.20350513	0.0491297645715504	Mutation
VHL	Mixed_downstream	-0.75338989	5.56929675951656e-05	Mutation
ZFPM1	Mixed_downstream	-0.0171417068	0.0419202495756646	Mutation
A1BG	EM_downstream	0.008450506	0.022191641667947	Amplification
ABCC1	UC_downstream	0.01563543325	0.0377162029429133	Amplification
ACTL6A	Mixed_downstream	-0.0138315	3.7905115621247e-05	Amplification
ADAM17	EM_downstream	0.01459751	0.0310035364761473	Amplification
ADAR	UC_downstream	-0.1764651645	0.0190385989642867	Amplification
ADORA2A	UC_downstream	0.0500418573	0.013550244977314	Amplification
ADORA2B	UC_downstream	0.17236711	0.0129796356986086	Amplification
AGAP2	EM_downstream	0.144855977	0.00231555676950743	Amplification
AKT2	EM_downstream	0.18393061025	6.40523580481295e-05	Amplification
ALK	EM_downstream	0.0235549588	0.0304421846771636	Amplification
ANAPC11	EM_downstream	-0.00214080000000005	0.0108044420192909	Amplification
ANAPC15	EM_downstream	-0.1323133	0.00865893897671628	Amplification
ANAPC2	EM_downstream	-0.0170939	0.0490917543808391	Amplification
AP1S1	Mixed_downstream	0.018117486	0.0142696338233348	Amplification
APOA1	EM_downstream	0.03081851945	0.000672158110019122	Amplification
ARHGEF17	UC_downstream	0.01805073	0.00687330546306924	Amplification
ARNTL2	EM_downstream	0.02840387	0.0166493841806781	Amplification
ARRB1	EM_downstream	0.0376268566	0.00332598246459852	Amplification
ASH2L	EM_downstream	-0.190884548	0.00359864184199769	Amplification
ATG7	Mixed_downstream	0.005720819	0.0411165785935159	Amplification
ATR	UC_downstream	-0.0635058000000001	0.00631765705373556	Amplification
BCL2	EM_downstream	-0.0104522036	0.0289970169900345	Amplification
BHLHE41	EM_downstream	0.0222477265	0.0494344345763123	Amplification
BMP7	EM_downstream	0.003942109	0.0309691940121218	Amplification
BRAF	EM_downstream	0.083465615	1.29707408063783e-05	Amplification
CALM1	Mixed_downstream	0.021720325	0.0092643211221637	Amplification
CALM3	Mixed_downstream	0.0445847033	0.0190116409504252	Amplification
CCL11	EM_downstream	0.0102523125	0.00569392572793606	Amplification
CCND1	EM_downstream	0.030418735	0.00262585598030536	Amplification
CCS	EM_downstream	0.126498976	0.000923452179662704	Amplification
CD4	EM_downstream	-0.0087924359	0.0128432160511934	Amplification
CDC16	EM_downstream	-0.00214955000000006	8.19794113742862e-05	Amplification
CDC26	EM_downstream	-0.16317207	0.0449035412086097	Amplification
CDK4	EM_downstream	0.357988422	0.00886488131081289	Amplification
CDK6	EM_downstream	0.352418335	0.000363866990295007	Amplification
CEBPB	Mixed_downstream	0.087398725	0.000306057920346869	Amplification
CEBPG	Mixed_downstream	0.00834634	0.0287614015078616	Amplification
CEBPZ	UC_downstream	-0.13407895	0.0213043166456683	Amplification
CIITA	EM_downstream	0.035975757	0.00851591226749291	Amplification
CNTF	Mixed_downstream	0.07237837	0.0023143378368023	Amplification
COPS5	EM_downstream	-0.00890695000000008	0.00100120940969778	Amplification
CRTC2	EM_downstream	0.0764972045	0.00420111105322211	Amplification
CRX	EM_downstream	0.1505914065	0.000243016200178737	Amplification
CSE1L	Mixed_downstream	-0.00971094999999988	0.035577102890806	Amplification
CSK	Mixed_downstream	-0.021408901	0.0262519587480248	Amplification
CTCF	UC_downstream	-0.00674319999999995	0.0480091956442556	Amplification
CYP2A13	UC_downstream	0.195533965	0.0390381169361723	Amplification
DDIT3	Mixed_downstream	0.3113162711	0.0176731192941737	Amplification
DEFA1	UC_downstream	-0.00067845355	3.90282453786732e-12	Amplification
DICER1	EM_downstream	-0.25244411	0.000645101459540158	Amplification
DNMT1	UC_downstream	-0.2217635035	0.0171615226348209	Amplification
DPP3	UC_downstream	0.04422731115	3.12536850373696e-05	Amplification
E2F3	Mixed_downstream	0.388102856	0.000229667641265807	Amplification
E4F1	Mixed_downstream	-0.4352765315	0.0135300237876936	Amplification
EBF2	Mixed_downstream	-0.003911167	0.0200879971538388	Amplification
ERBB2	UC_downstream	0.211420656	0.0075710426178726	Amplification
ERCC3	UC_downstream	-0.37434185	0.0152215602821638	Amplification
ERF	EM_downstream	0.008583016	0.0135302949374312	Amplification
F7	EM_downstream	0.0141335274	0.0133161245134128	Amplification
FADD	Mixed_downstream	0.229482453	4.71171781633355e-10	Amplification
FGF19	EM_downstream	0.03113548	2.76323670381962e-13	Amplification
FGFR2	EM_downstream	0.02509108	0.016886795504404	Amplification
FLT1	Mixed_downstream	-0.015684972	0.0492842597979203	Amplification
FOSB	Mixed_downstream	0.073119413	0.00526316046155021	Amplification
FOSL2	EM_downstream	0.3342890584	0.000989740191347263	Amplification
FOXG1	EM_downstream	-0.007821446	0.0276268214217804	Amplification
FOXH1	Mixed_downstream	0.01074952	0.0305668070765352	Amplification
FOXJ1	Mixed_downstream	0.0092952	0.0493827036061415	Amplification
FOXM1	Mixed_downstream	-0.1480983	0.0146835352412972	Amplification
FSHB	EM_downstream	0.007453422	0.00585958219232756	Amplification
GAB2	EM_downstream	0.1935997004	3.14394193198107e-08	Amplification
GABPA	Mixed_downstream	-0.4590034885	0.00274709940390604	Amplification
GABPB1	Mixed_downstream	-0.2600874168	0.041475111894336	Amplification
GABPB2	Mixed_downstream	0.0375266385	0.0446108271863263	Amplification
GAST	EM_downstream	0.04907485225	0.0140648297641778	Amplification
GATA4	EM_downstream	0.0324198045	0.00583525042470345	Amplification
GLI1	EM_downstream	0.3571611775	0.00523268043072277	Amplification
GNAI1	UC_downstream	0.0093290869	0.00798487486359143	Amplification
GNAI3	UC_downstream	0.05124312	0.0373048508903226	Amplification
GSTM1	EM_downstream	-0.01023944	0.0241130039470869	Amplification
GSTP1	EM_downstream	0.118077738	2.83290311645813e-08	Amplification
GTF2F2	UC_downstream	-0.36292619	0.0217091316791706	Amplification
GTF2H2	UC_downstream	-0.30640821	0.000501417865501283	Amplification
GTF3A	Mixed_downstream	-0.11965255	0.00464370945669231	Amplification
GUSB	Mixed_downstream	0.017472485	0.0358373800712633	Amplification
H2AFX	EM_downstream	-0.1929990455	0.0115338442109379	Amplification
HEY2	EM_downstream	0.09145621	0.0461163465795872	Amplification
HIPK1	EM_downstream	0.0928576005	0.0138498461646871	Amplification
HIST1H2AC	EM_downstream	0.03371404585	0.0137458304926796	Amplification
HIST1H2AD	EM_downstream	0.1030917385	0.0335727700603041	Amplification
HIST1H2AE	EM_downstream	0.309202	0.00772969793414358	Amplification
HIST1H2BB	EM_downstream	0.134867563	0.0313769078687022	Amplification
HIST1H2BD	EM_downstream	0.2206947545	0.00637192527175189	Amplification
HIST1H2BG	EM_downstream	0.076277305	0.0257372073738695	Amplification
HIST1H3B	EM_downstream	0.0753202915	0.0257372073738695	Amplification
HIST1H3E	EM_downstream	0.1367728505	0.00107594327432823	Amplification
HIST1H4D	EM_downstream	0.1000467341	0.0303259725953287	Amplification
HIST1H4I	EM_downstream	0.00259813465	0.0433549911348372	Amplification
HIST2H2BE	EM_downstream	0.116616904	0.00167388299299806	Amplification
HMGA2	EM_downstream	0.1148053118	0.0399565037399979	Amplification
HMOX1	Mixed_downstream	0.036781187	0.00397717406881643	Amplification
HNF1A	Mixed_downstream	0.21037330225	0.0306463849863835	Amplification
HR	Mixed_downstream	-0.005245171	0.0397237793504831	Amplification
IGF1R	Mixed_downstream	0.11800866	0.00220746243911387	Amplification
IKBKB	EM_downstream	-0.02656211215	0.0074178898021565	Amplification
IL4R	EM_downstream	0.08166314	0.00992235197717574	Amplification
ING4	EM_downstream	-0.0009240171	0.00244324249611935	Amplification
JUN	Mixed_downstream	0.2802759	0.0116738066887677	Amplification
KAT5	Mixed_downstream	-0.0888877199999999	0.000708827198906409	Amplification
KLF5	EM_downstream	0.13182484	0.0375910027093604	Amplification
KNG1	UC_downstream	-0.036341585	0.00957484548688882	Amplification
KRAS	Mixed_downstream	0.537668362	1.95958951079422e-05	Amplification
KRT8	UC_downstream	-0.14183692	0.0230669525757591	Amplification
LCN2	EM_downstream	0.033905565	0.000590750188268021	Amplification
LEP	EM_downstream	0.0126566722	0.0227037751378296	Amplification
LIN37	UC_downstream	0.1207858	0.0224730334838328	Amplification
MACROD1	UC_downstream	0.07034980055	0.00163295518625976	Amplification
MAFG	Mixed_downstream	0.0579719845	0.00120613156407429	Amplification
MAK	EM_downstream	0.0705544376	0.0111218770005173	Amplification
MDM2	EM_downstream	0.397925865	0.011834309978968	Amplification
MECOM	Mixed_downstream	0.0081589555	0.00461967241799418	Amplification
MEF2D	EM_downstream	0.0448157639	4.20685314580529e-05	Amplification
MET	EM_downstream	0.0021538415	0.0353327355949892	Amplification
MITF	EM_downstream	0.35357777	3.70985640821444e-09	Amplification
MT1A	EM_downstream	-0.053965501	0.00966677393408123	Amplification
MYCN	Mixed_downstream	0.845476925	4.52103453623555e-07	Amplification
NFE2	Mixed_downstream	0.4046910299	0.0228896231344488	Amplification
NFKBIB	EM_downstream	0.0981868275	0.00149425721623515	Amplification
NOX4	EM_downstream	0.02402012	0.00209775644566742	Amplification
NR1D1	EM_downstream	0.052641205	0.0180960797003694	Amplification
NR5A2	EM_downstream	-0.0084099447	0.0397743778351419	Amplification
NRF1	Mixed_downstream	-0.0316553000000001	0.00190187144385094	Amplification
ORMDL3	EM_downstream	0.117769402	5.54341864849865e-05	Amplification
P2RY11	EM_downstream	0.00280511765	0.0229296957942864	Amplification
P2RY6	UC_downstream	0.120749983	0.00024421623708546	Amplification
PAX2	Mixed_downstream	0.0218454036	0.043410424392358	Amplification
PAX3	Mixed_downstream	0.39722409	0.0017706741134957	Amplification
PAX8	Mixed_downstream	0.5641107089	9.23088709822239e-05	Amplification
PGR	Mixed_downstream	0.01723563	0.000827483797826099	Amplification
PHB	EM_downstream	-0.0288153	0.000710860488228229	Amplification
PLAUR	EM_downstream	0.0446116907	0.0123605485886257	Amplification
PLK1	EM_downstream	-0.0065736999999999	0.0435039125147171	Amplification
PML	EM_downstream	-0.006635708	0.0321811470213897	Amplification
POLR2B	Mixed_downstream	-0.00627940000000005	0.00224057315588733	Amplification
POLR2C	Mixed_downstream	-0.0082487	0.00643377134463898	Amplification
POLR2D	Mixed_downstream	-0.0225779999999999	0.0267695317830283	Amplification
POLR2H	Mixed_downstream	-0.028061	0.0166401256930519	Amplification
POLR2J	Mixed_downstream	-0.000670150000000036	0.00889187116458188	Amplification
POLR2K	Mixed_downstream	-0.0270772499999999	4.99671971284029e-06	Amplification
PPP2R1A	EM_downstream	-0.0177174684	0.0265107132496312	Amplification
PPP2R2A	UC_downstream	-0.14880417485	0.0334305345853266	Amplification
PPRC1	Mixed_downstream	-0.261838415	0.0413707506008759	Amplification
PRDM1	EM_downstream	-0.0175544498	0.0448398486197928	Amplification
PRDX2	EM_downstream	0.112509536	0.00147673320080638	Amplification
PRKAA2	Mixed_downstream	0.136171625	0.0204379712435295	Amplification
PUM2	EM_downstream	0.029464978	0.0387056402209251	Amplification
RAG1	EM_downstream	0.0490024728	0.0220746697143828	Amplification
RAG2	EM_downstream	0.011945935	0.0236596385025977	Amplification
RANBP9	EM_downstream	0.18528605	0.0123851137278166	Amplification
RB1CC1	EM_downstream	-0.05376692	0.00639033137406102	Amplification
RBBP5	EM_downstream	-0.0424646	0.0308207981554143	Amplification
RBBP8	Mixed_downstream	-0.1121616	0.000729482477690658	Amplification
RECK	EM_downstream	0.0172001745	0.000910336446532922	Amplification
RELB	Mixed_downstream	0.0689336515	0.0169333431781085	Amplification
REPIN1	Mixed_downstream	0.02097552	0.0160695751174271	Amplification
RORC	EM_downstream	0.00928879405	0.0350644713256245	Amplification
RUVBL1	Mixed_downstream	-0.000188999999999995	0.0449062514389722	Amplification
RUVBL2	Mixed_downstream	-0.003556	0.00176311976900168	Amplification
RYR1	EM_downstream	0.116463321	0.000119647525645863	Amplification
S100A11	UC_downstream	0.0172465	0.0192016338970885	Amplification
SAP18	UC_downstream	-0.0445014	0.018227663257708	Amplification
SETD1A	EM_downstream	-0.1917302	0.000140840002598886	Amplification
SF1	Mixed_downstream	-0.0020213	0.0230107223815192	Amplification
SIRT1	EM_downstream	0.02042461	0.0383608119192838	Amplification
SIRT5	EM_downstream	0.0258661181	0.0492110069245796	Amplification
SMARCB1	EM_downstream	-0.08638939	0.00536712026629592	Amplification
SMARCD3	Mixed_downstream	0.000929869	0.0458266107023563	Amplification
SNAI1	EM_downstream	0.012313325	0.0292675361131265	Amplification
SND1	EM_downstream	-0.002574139	0.0063376701319025	Amplification
SNW1	EM_downstream	-0.0116864	0.0450725490392491	Amplification
SPDEF	EM_downstream	0.053689405	0.00530298537889552	Amplification
SPHK1	EM_downstream	0.01110364315	0.0423535524915751	Amplification
SSRP1	UC_downstream	-0.0244585500000001	0.0473759478398544	Amplification
STAT5B	Mixed_downstream	0.0825289058	0.0346009837434678	Amplification
STAT6	Mixed_downstream	0.1297900745	0.00966910453295114	Amplification
SULT2A1	UC_downstream	0.0179370395	0.0179997656201205	Amplification
SUMO1	EM_downstream	0.095762906	0.0322972037857874	Amplification
SVIL	EM_downstream	0.02400114	0.0338155860957017	Amplification
TAF10	Mixed_downstream	-0.28987516	0.0123726060362901	Amplification
TBX5	EM_downstream	0.082266519	0.00510475111923201	Amplification
TEAD2	EM_downstream	0.01317793	0.0477789074555791	Amplification
TFAP2C	Mixed_downstream	0.061433721	0.0349387577996819	Amplification
TFDP2	Mixed_downstream	0.0127681465	0.0392016175728656	Amplification
TGFB1	EM_downstream	0.0818336424	0.00390774391147708	Amplification
TGIF1	Mixed_downstream	0.04458215	0.00975020656045746	Amplification
TGS1	Mixed_downstream	-0.0803132000000001	0.00742743643307505	Amplification
TIMP2	UC_downstream	0.0149102321	0.022160994020911	Amplification
TIPARP	Mixed_downstream	0.06466605	0.0101366937933608	Amplification
TMF1	EM_downstream	0.0426834726	4.04822786399111e-05	Amplification
TNIK	Mixed_downstream	-0.004060997	0.0424105045797684	Amplification
TP53BP2	Mixed_downstream	-0.03132768	0.0287945892162961	Amplification
TP63	Mixed_downstream	0.0247509327	0.00284573427009846	Amplification
TRH	EM_downstream	-0.004174112	0.0105290130813373	Amplification
TRIM24	EM_downstream	0.004927689	0.0468764612336415	Amplification
TRRAP	Mixed_downstream	-0.0170011999999999	2.09302940339562e-06	Amplification
TYR	UC_downstream	0.0061087805	0.000505310316354105	Amplification
UBA3	EM_downstream	-0.0363469199999999	0.0194479234933561	Amplification
UCN	EM_downstream	0.138196312	0.0301913112087662	Amplification
USF2	EM_downstream	0.15196051	0.00986491838083955	Amplification
YAP1	Mixed_downstream	0.232074124	0.00098721458948328	Amplification
ZNF318	EM_downstream	0.1888376726	0.00184336266493327	Amplification
ZNF461	EM_downstream	0.006928635	0.000187701538938841	Amplification
