# Supplementary figures and images for: Somatic mutations in early metazoan genes disrupt regulatory links between unicellular and multicellular genes in cancer
Source: eLife journal article supplement (doi:10.7554/elife.40947), 2019-02-25

UC-t regulators

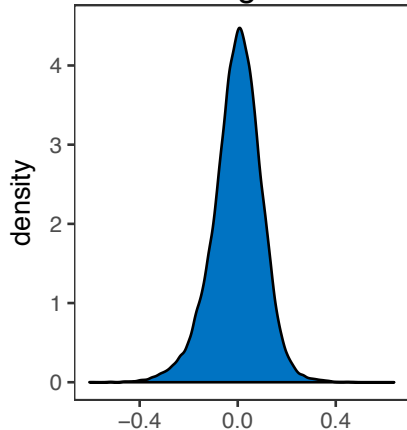

UC/EM-i regulators

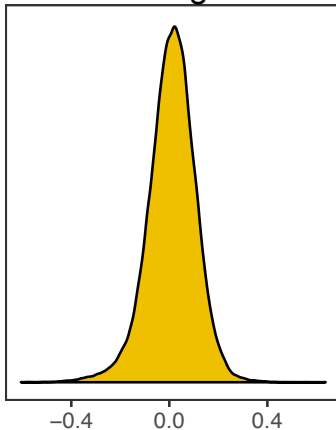

EM-t regulators

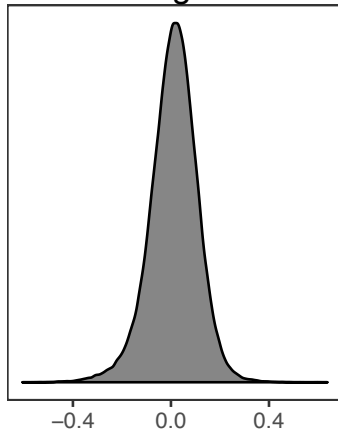

Correlation between dependency and IC50

Supplement: supp [file elife-40947-supp-v1.zip › elife_poa_e40947_Figure_5_figure_supplement_4.pdf]

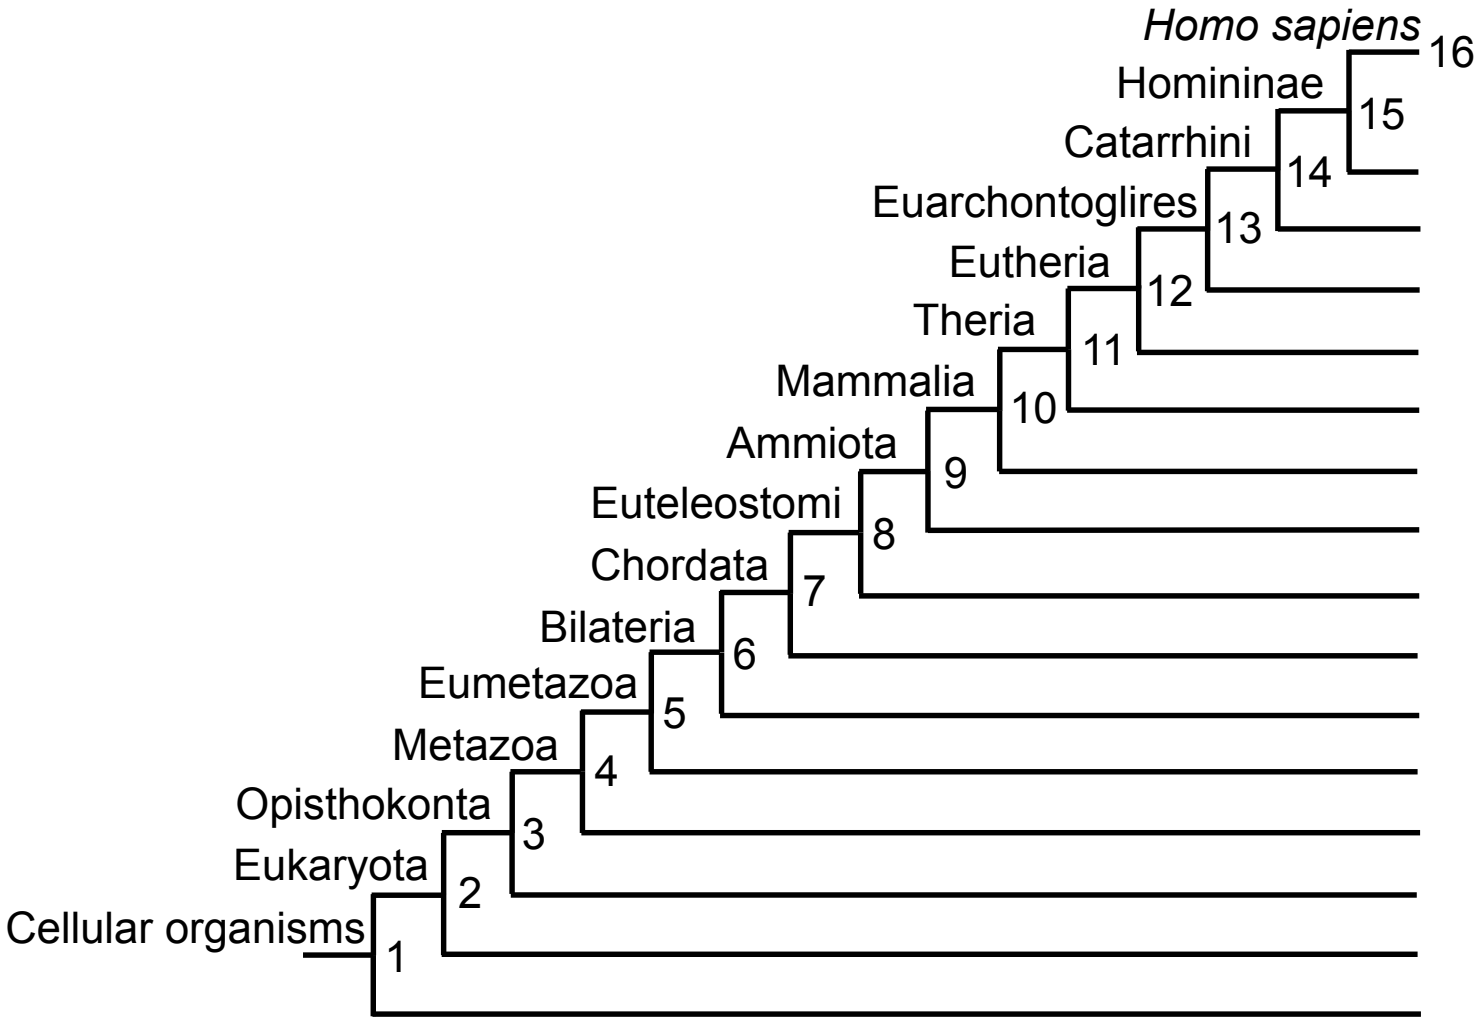

Supplement: supp [file elife-40947-supp-v1.zip › elife_poa_e40947_Figure_1_figure_supplement_2.pdf]

Fraction of non-recurrent genes with missense mutations

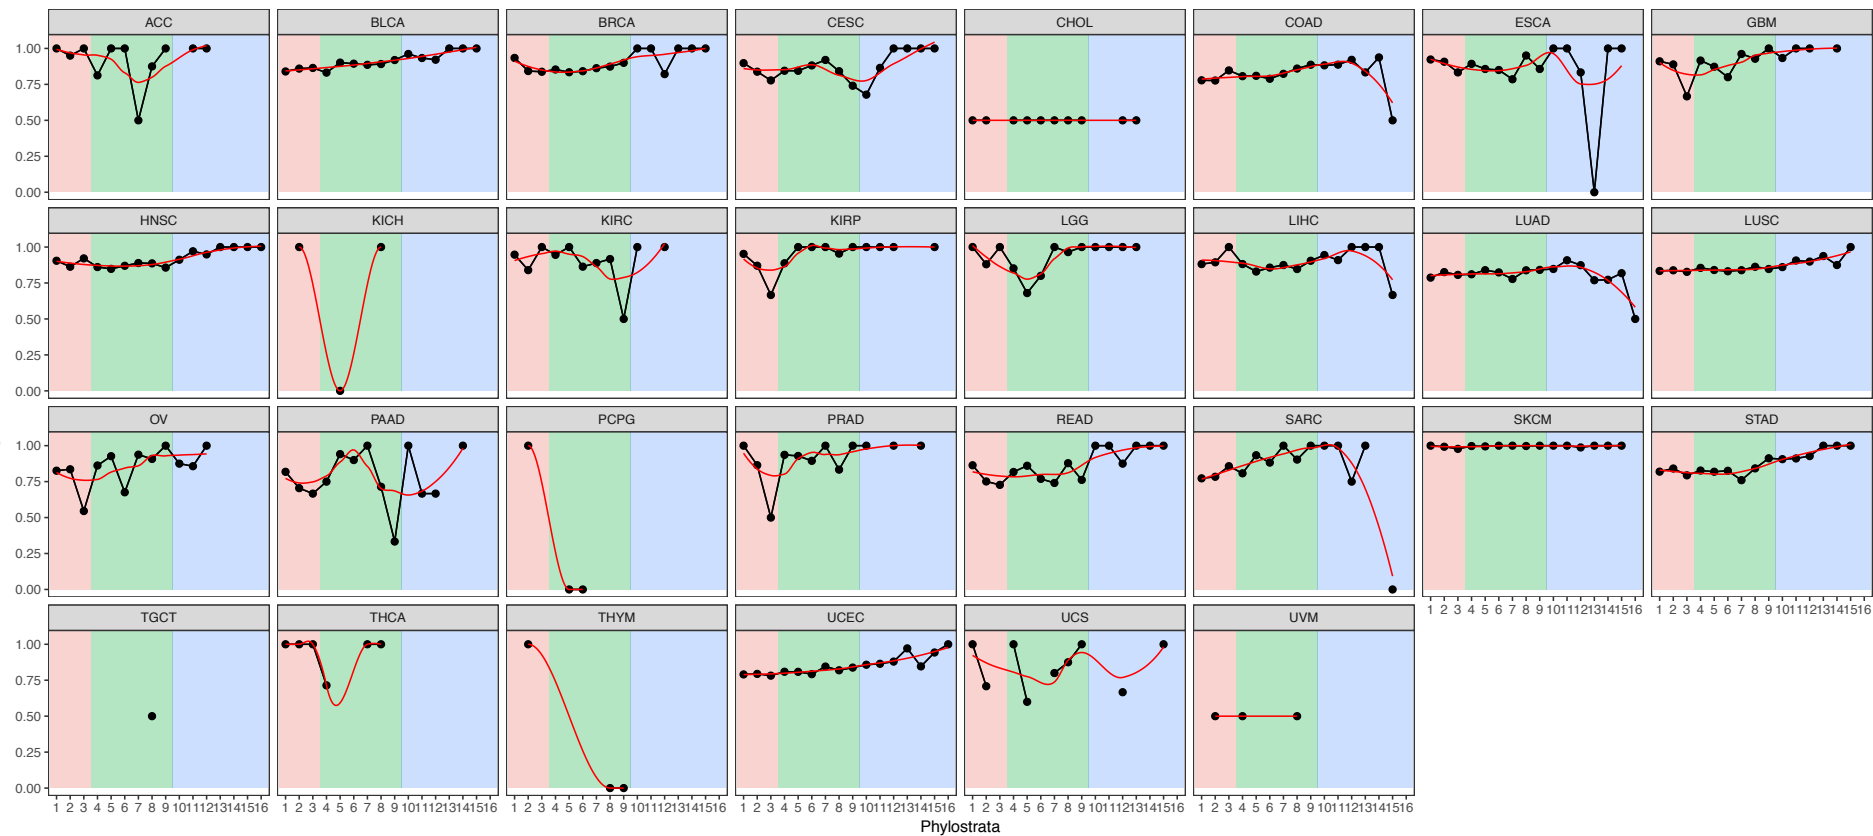

Supplement: supp [file elife-40947-supp-v1.zip › elife_poa_e40947_Figure_1_figure_supplement_7.pdf]

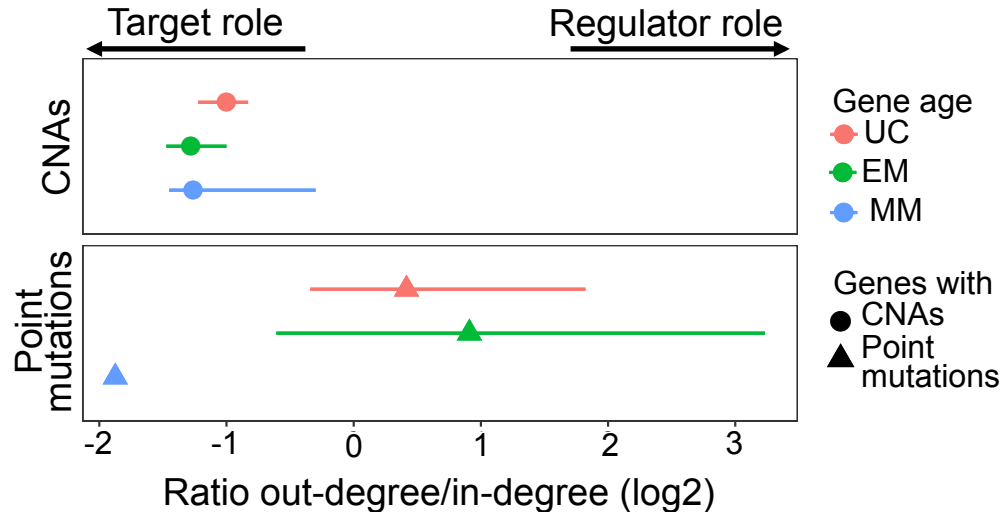

Supplement: supp [file elife-40947-supp-v1.zip › elife_poa_e40947_Figure_2_figure_supplement_6.pdf]

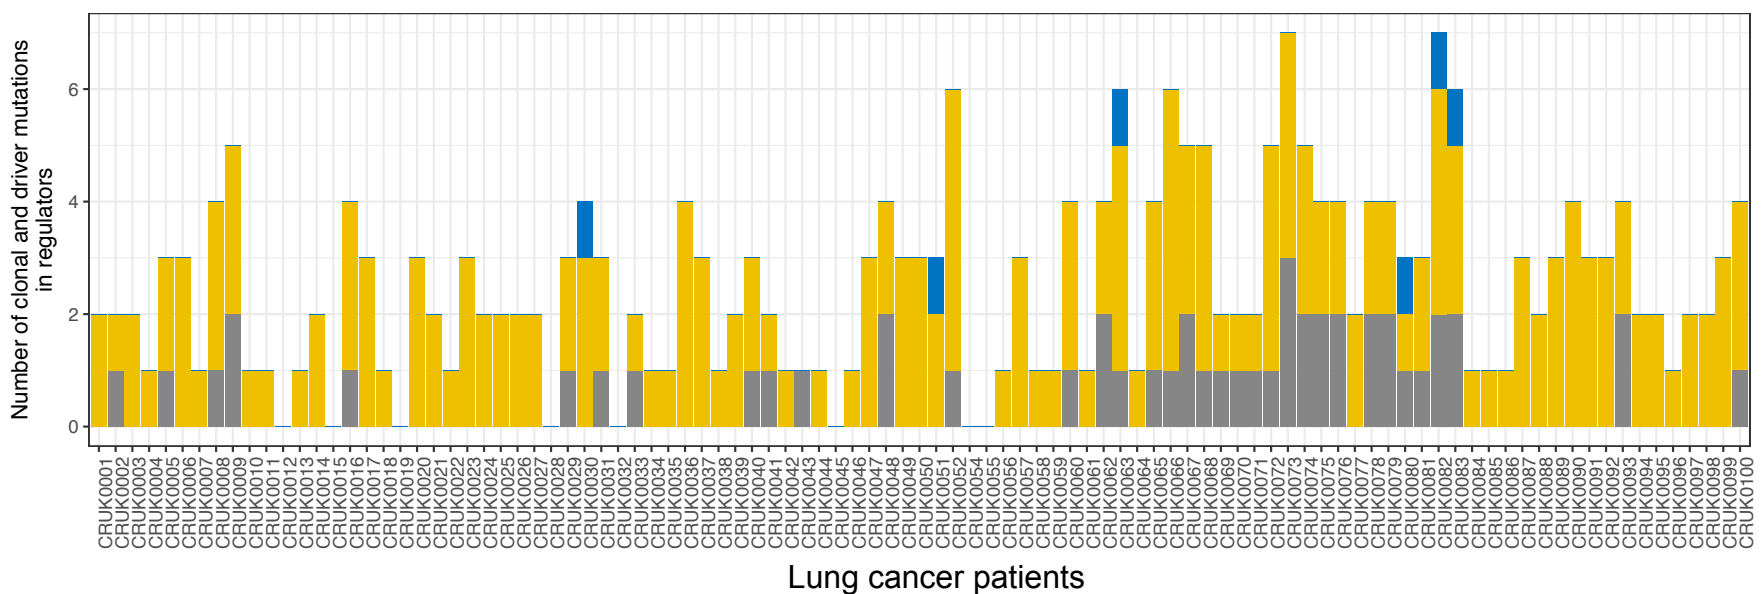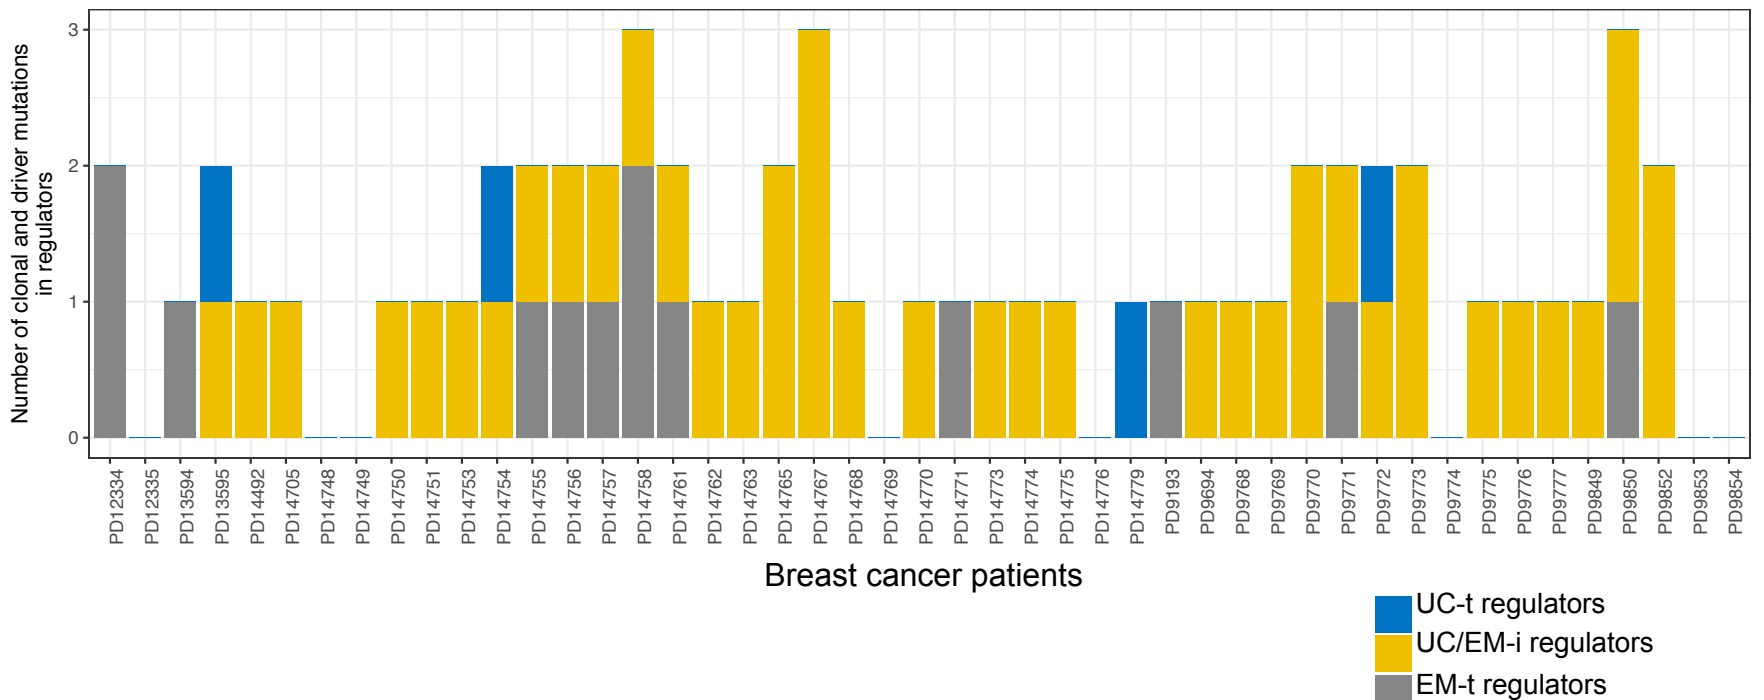

Supplement: supp [file elife-40947-supp-v1.zip › elife_poa_e40947_Figure_5_figure_supplement_1.pdf]

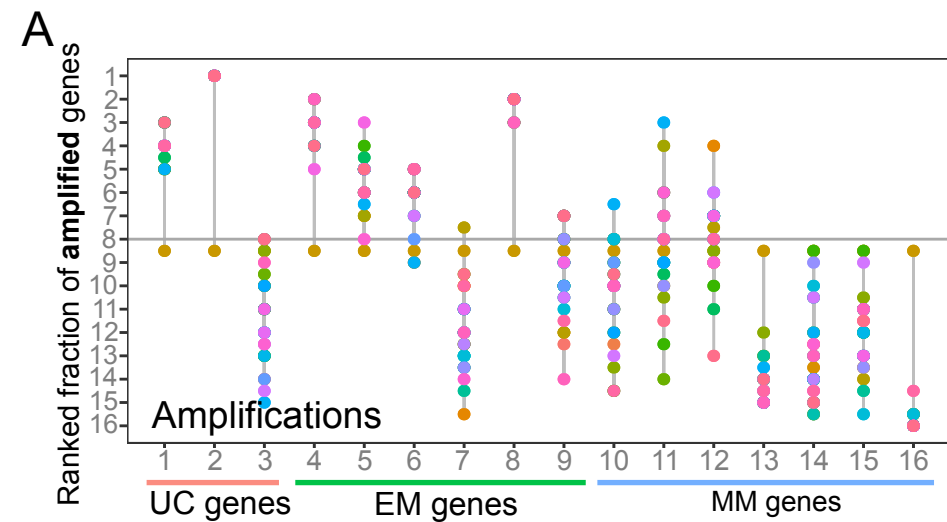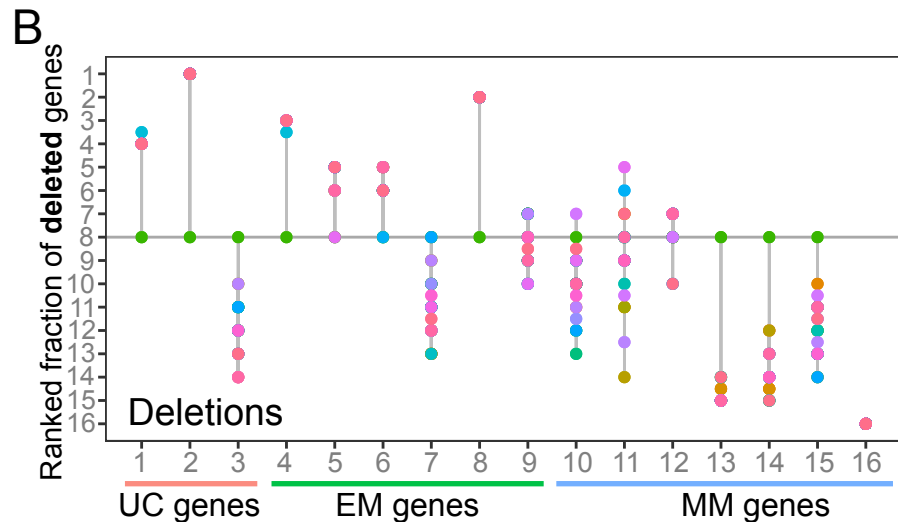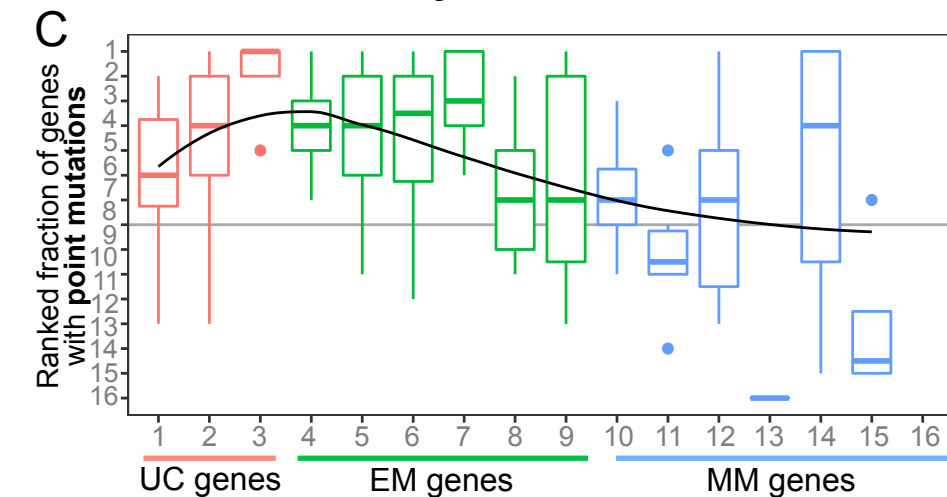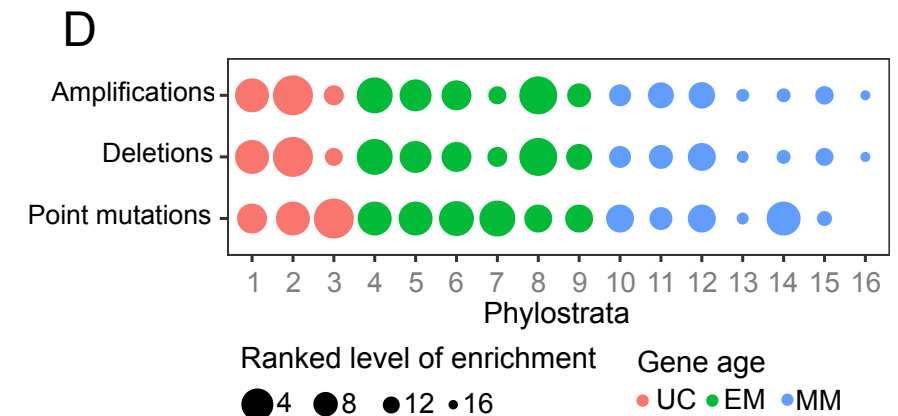

Supplement: supp [file elife-40947-supp-v1.zip › elife_poa_e40947_Figure_1_figure_supplement_4.pdf]

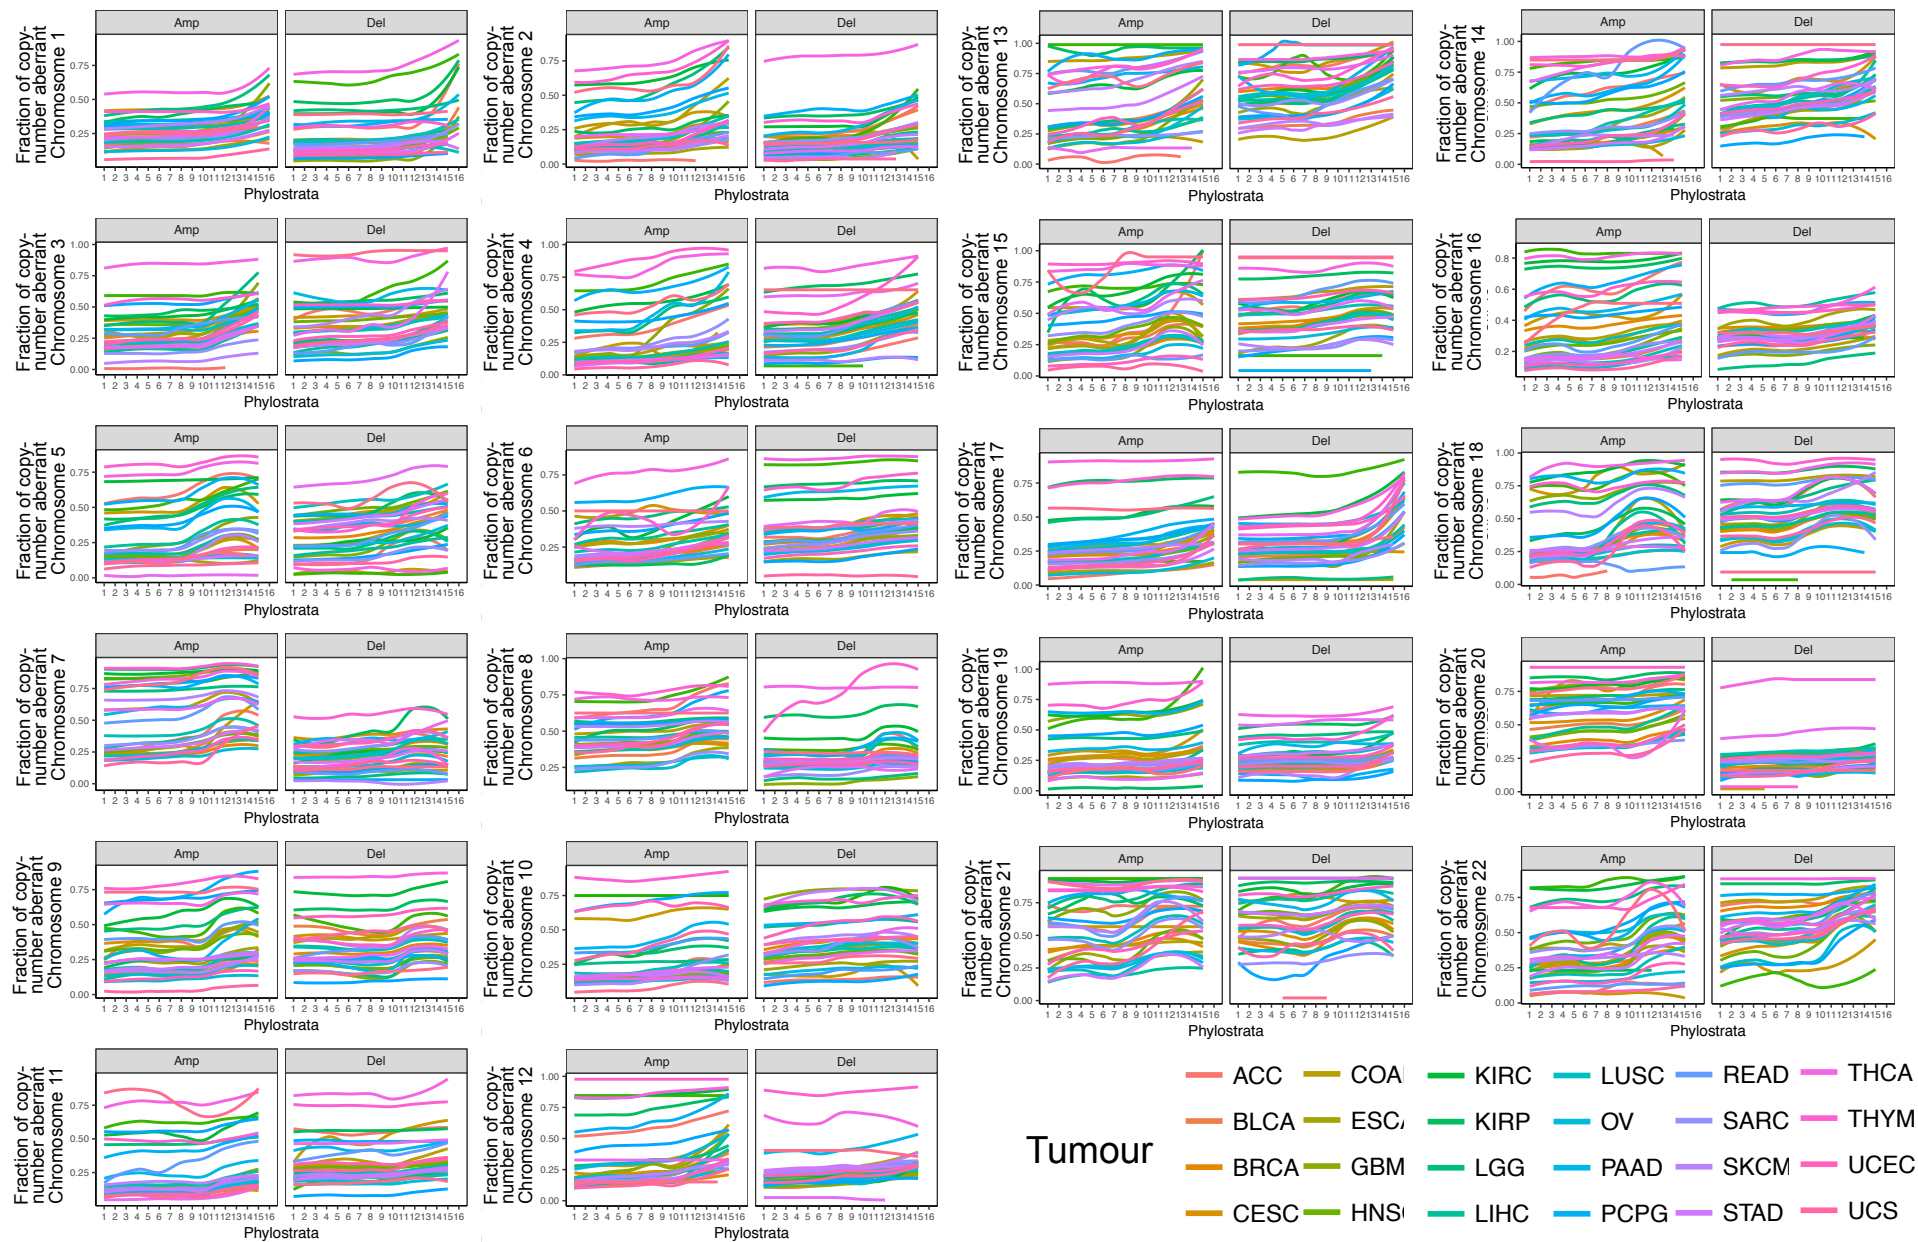

Supplement: supp [file elife-40947-supp-v1.zip › elife_poa_e40947_Figure_1_figure_supplement_9.pdf]

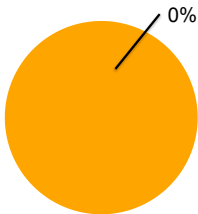

UC-t regulators

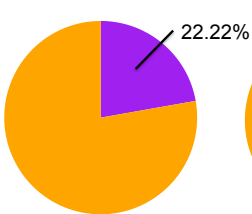

UC/EM-i regulators

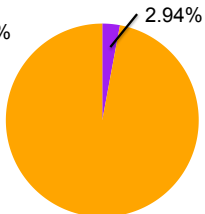

EM-t regulators

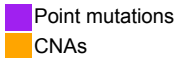

Supplement: supp [file elife-40947-supp-v1.zip › elife_poa_e40947_Figure_3_figure_supplement_2.pdf]

A

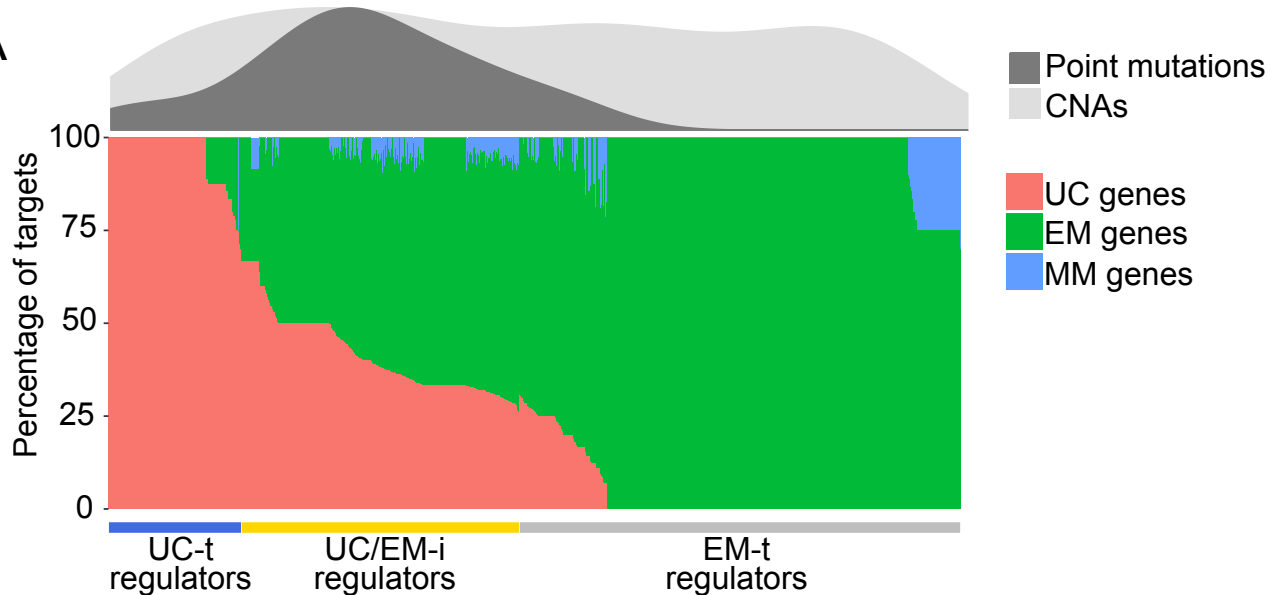

B

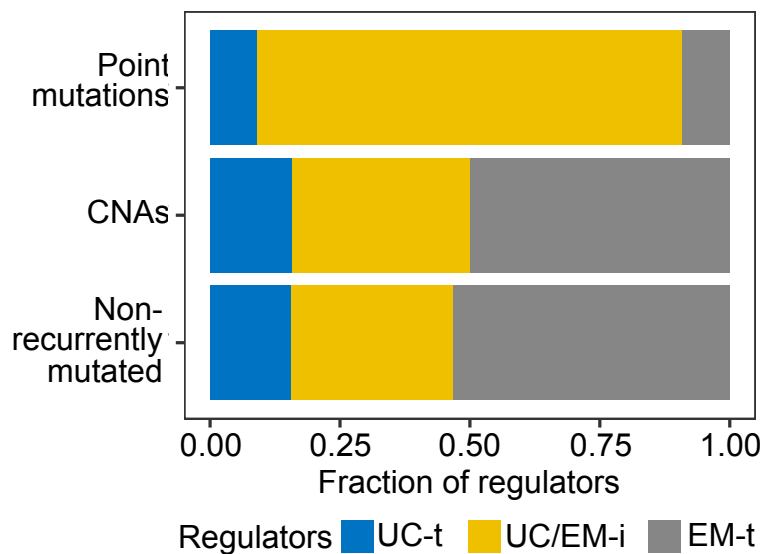

Supplement: supp [file elife-40947-supp-v1.zip › elife_poa_e40947_Figure_3_figure_supplement_1.pdf]

Regulators

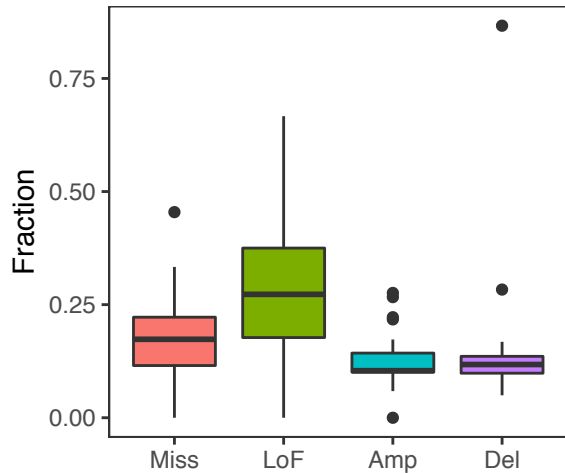

Targets

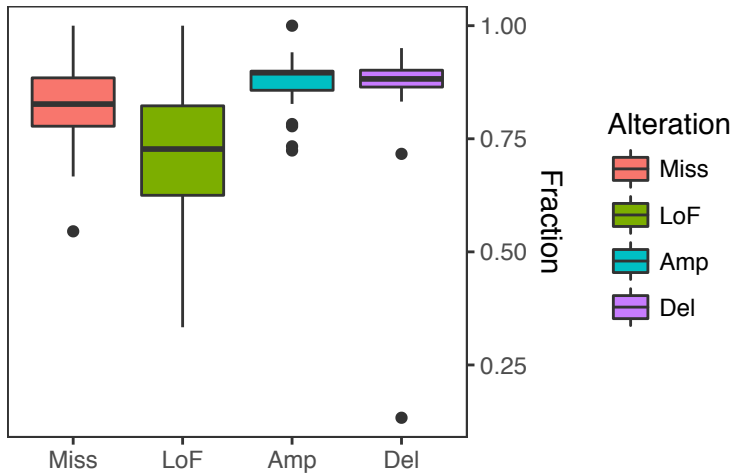

Supplement: supp [file elife-40947-supp-v1.zip › elife_poa_e40947_Figure_2_figure_supplement_4.pdf]

Correlation between drug sensitivity  
and PPRC1 dependency

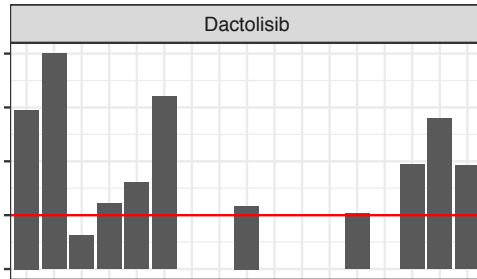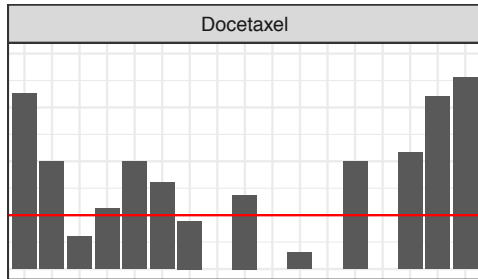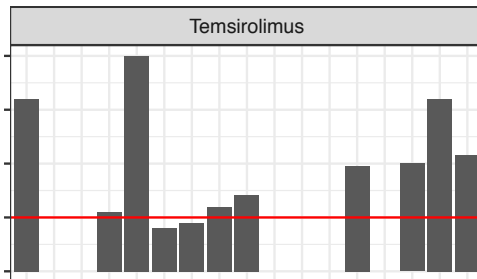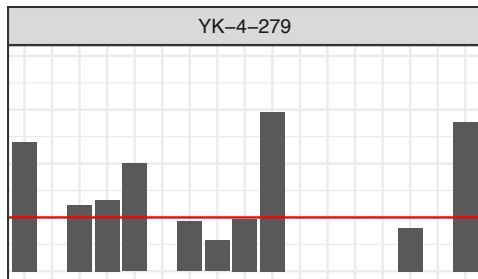

Cell line tissue type

Supplement: supp [file elife-40947-supp-v1.zip › elife_poa_e40947_Figure_5_figure_supplement_7.pdf]

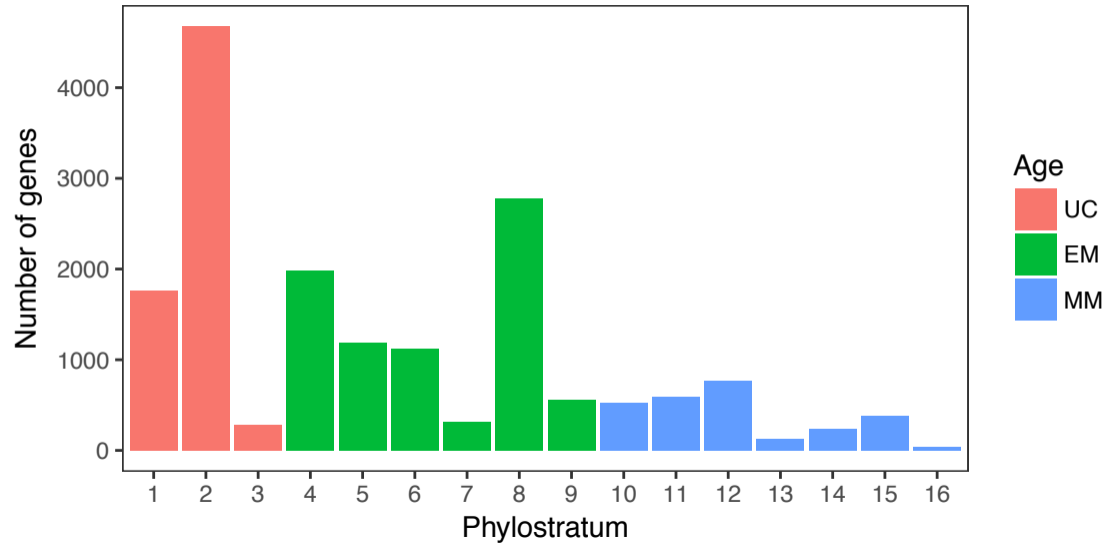

Supplement: supp [file elife-40947-supp-v1.zip › elife_poa_e40947_Figure_1_figure_supplement_3.pdf]

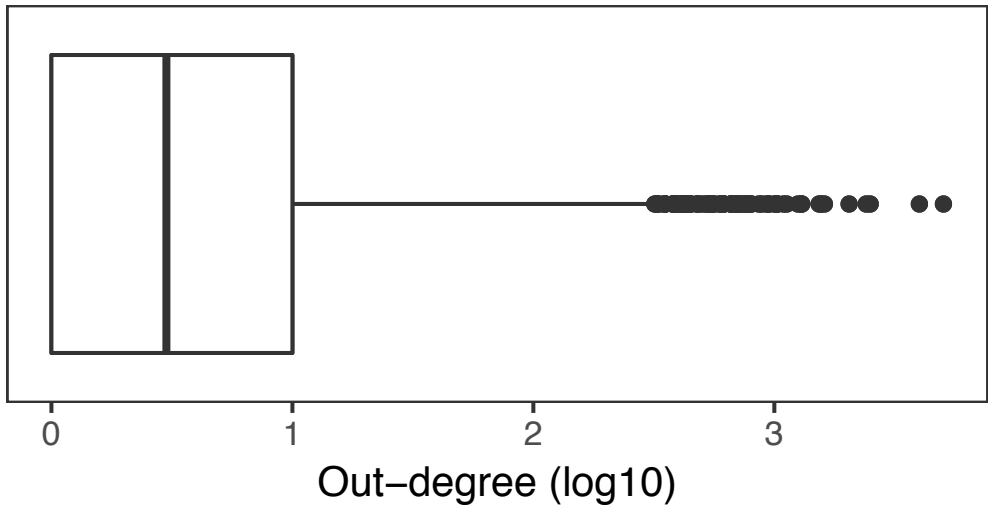

Supplement: supp [file elife-40947-supp-v1.zip › elife_poa_e40947_Figure_2_figure_supplement_1.pdf]

Fraction of non-recurrent genes

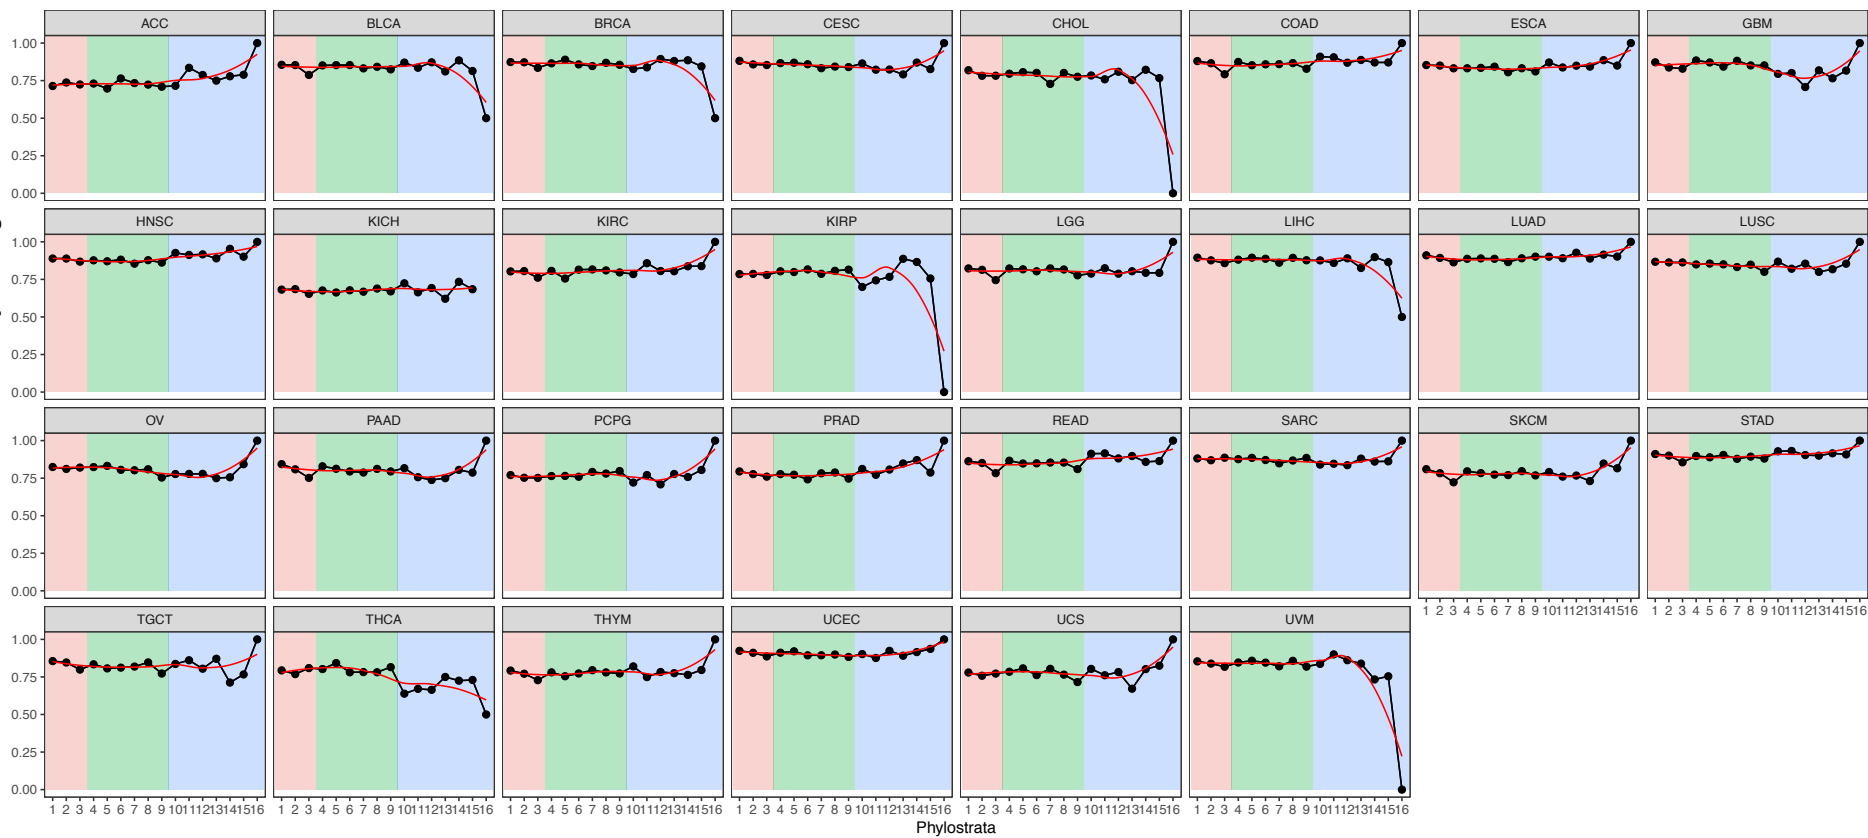

Supplement: supp [file elife-40947-supp-v1.zip › elife_poa_e40947_Figure_1_figure_supplement_5.pdf]

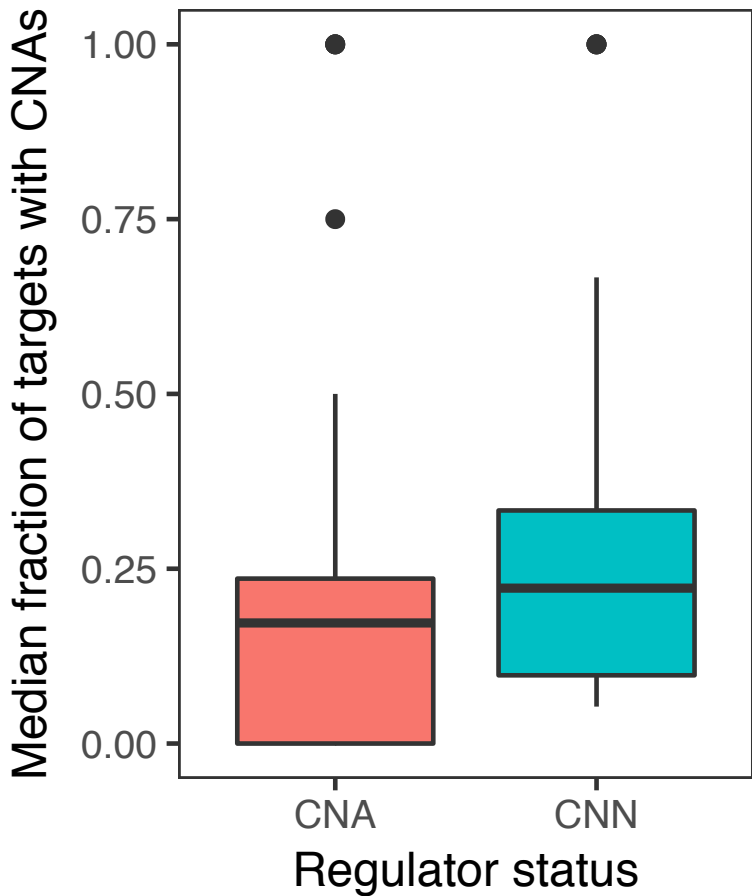

Supplement: supp [file elife-40947-supp-v1.zip › elife_poa_e40947_Figure_4_figure_supplement_3.pdf]

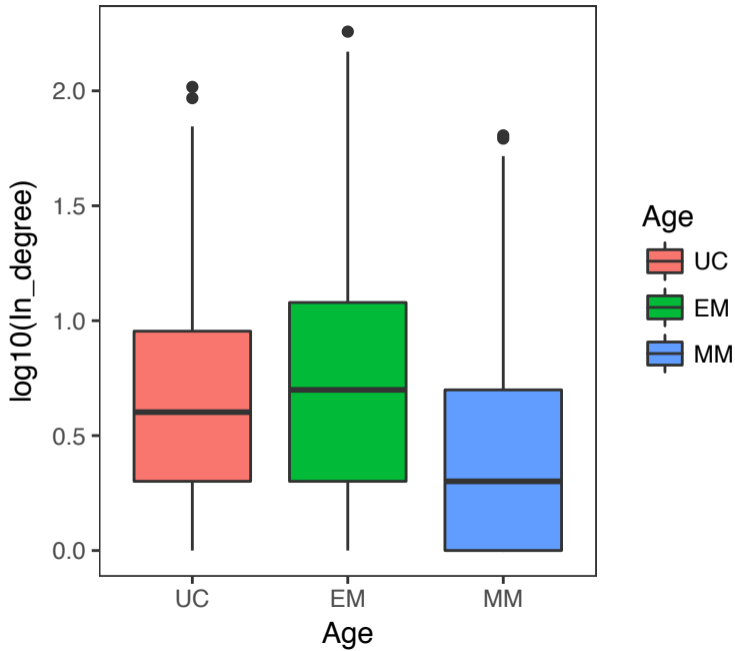

Supplement: supp [file elife-40947-supp-v1.zip › elife_poa_e40947_Figure_2_figure_supplement_3.pdf]

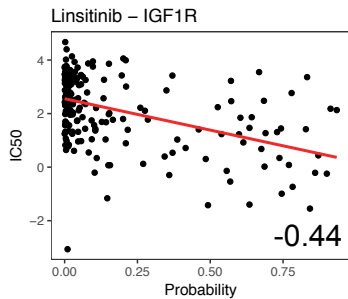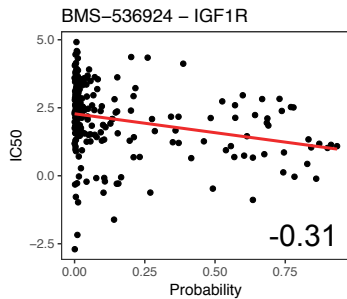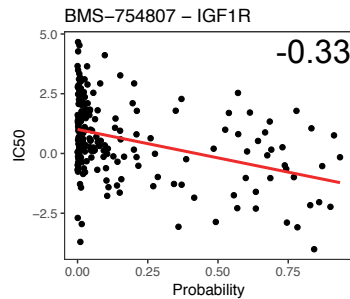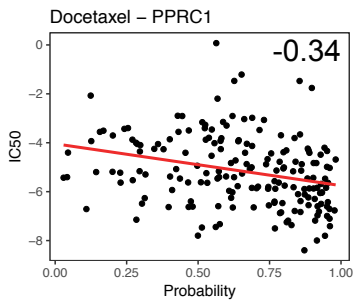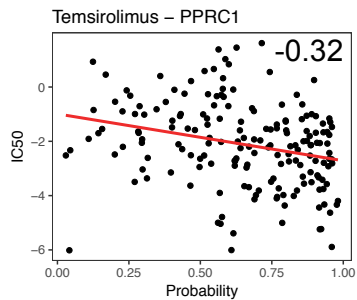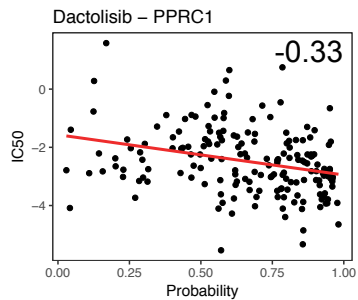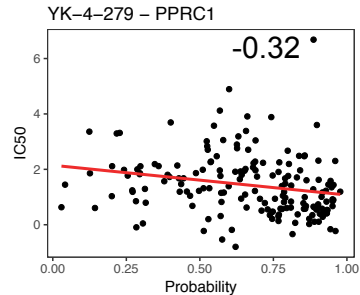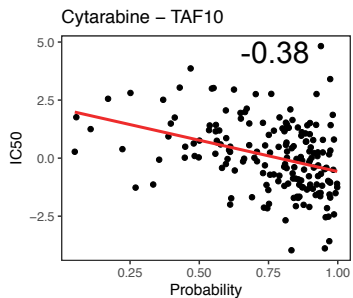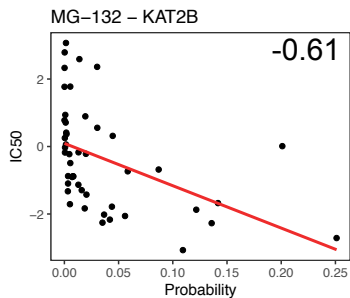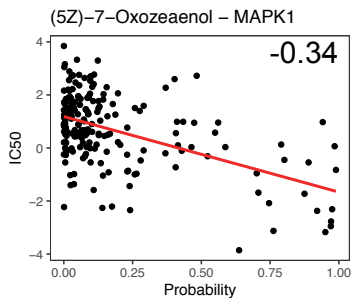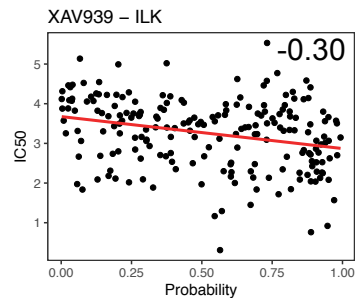

Supplement: supp [file elife-40947-supp-v1.zip › elife_poa_e40947_Figure_5_figure_supplement_5.pdf]

Fraction of non-recurrent genes with LoF mutations

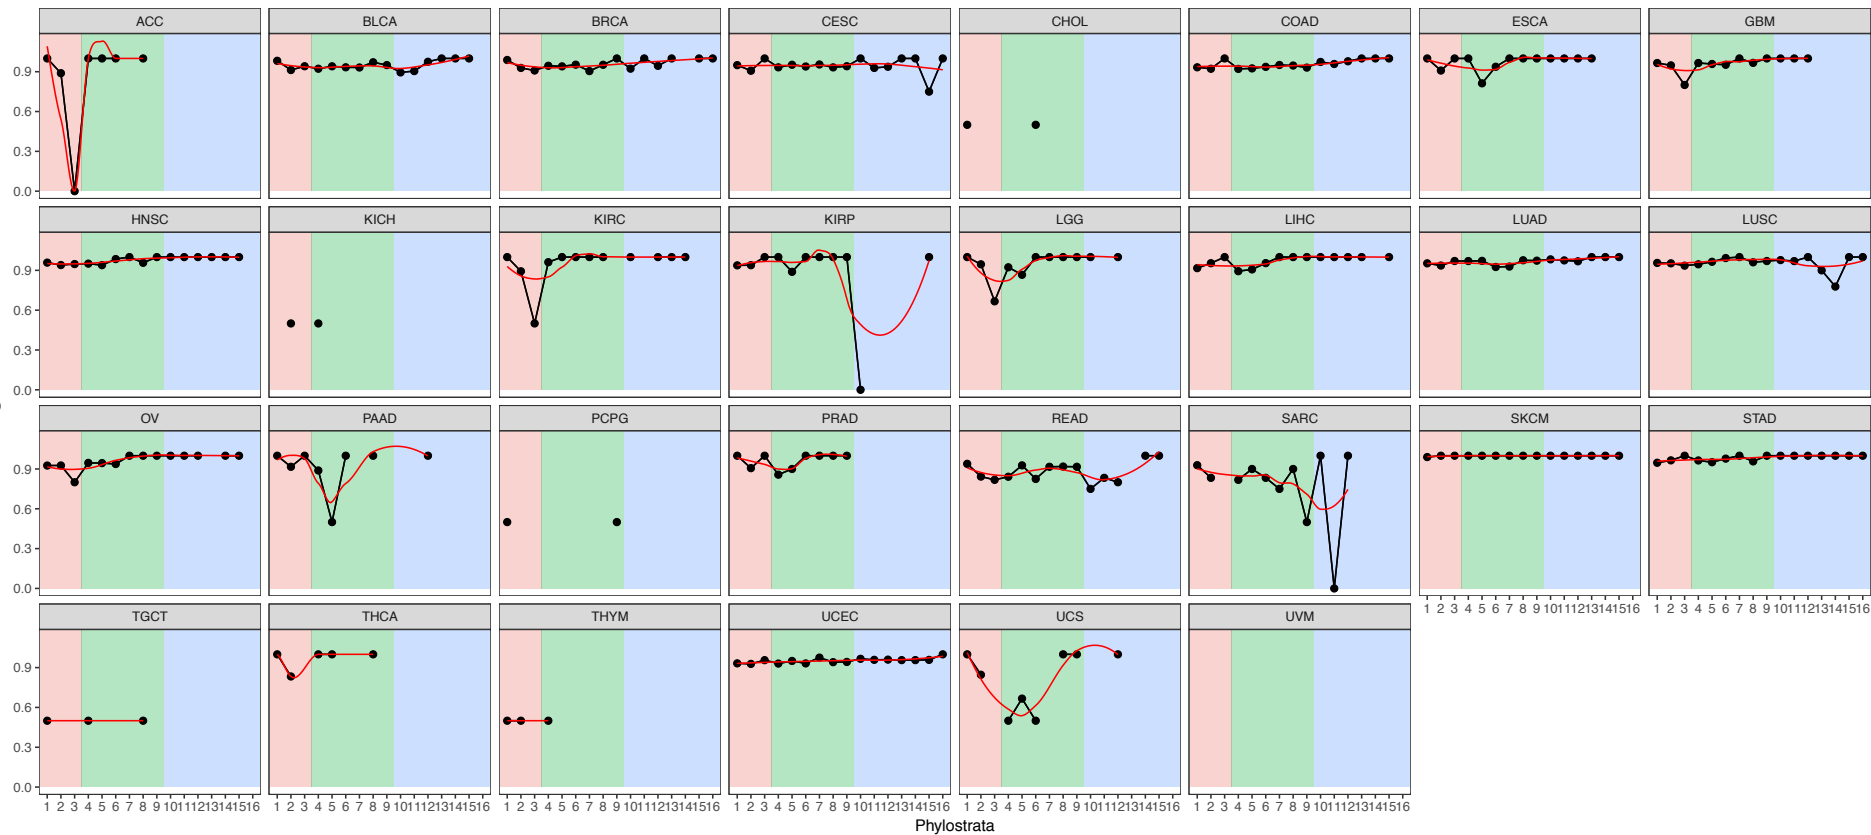

Supplement: supp [file elife-40947-supp-v1.zip › elife_poa_e40947_Figure_1_figure_supplement_8.pdf]

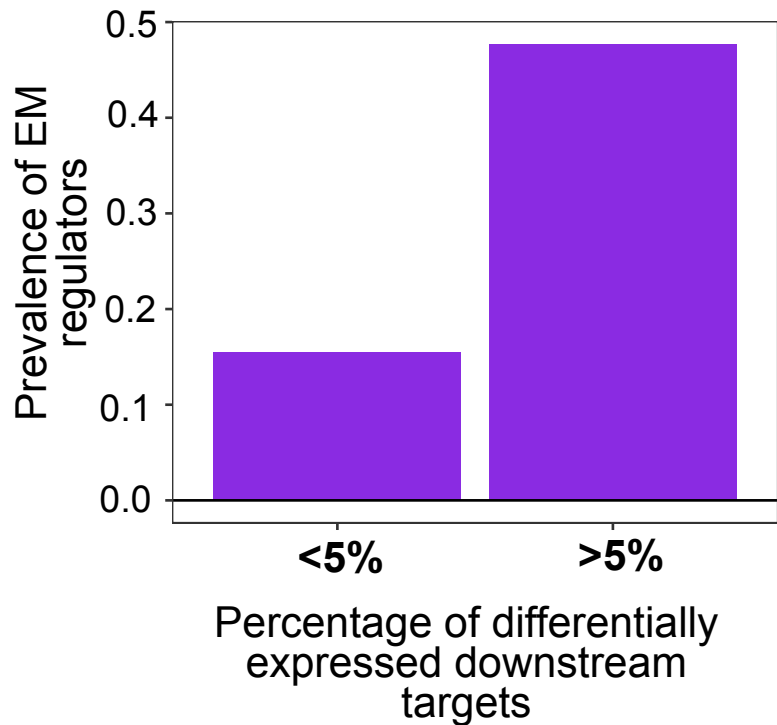

Supplement: supp [file elife-40947-supp-v1.zip › elife_poa_e40947_Figure_3_figure_supplement_3.pdf]

Fraction of non-recurrent deleted genes

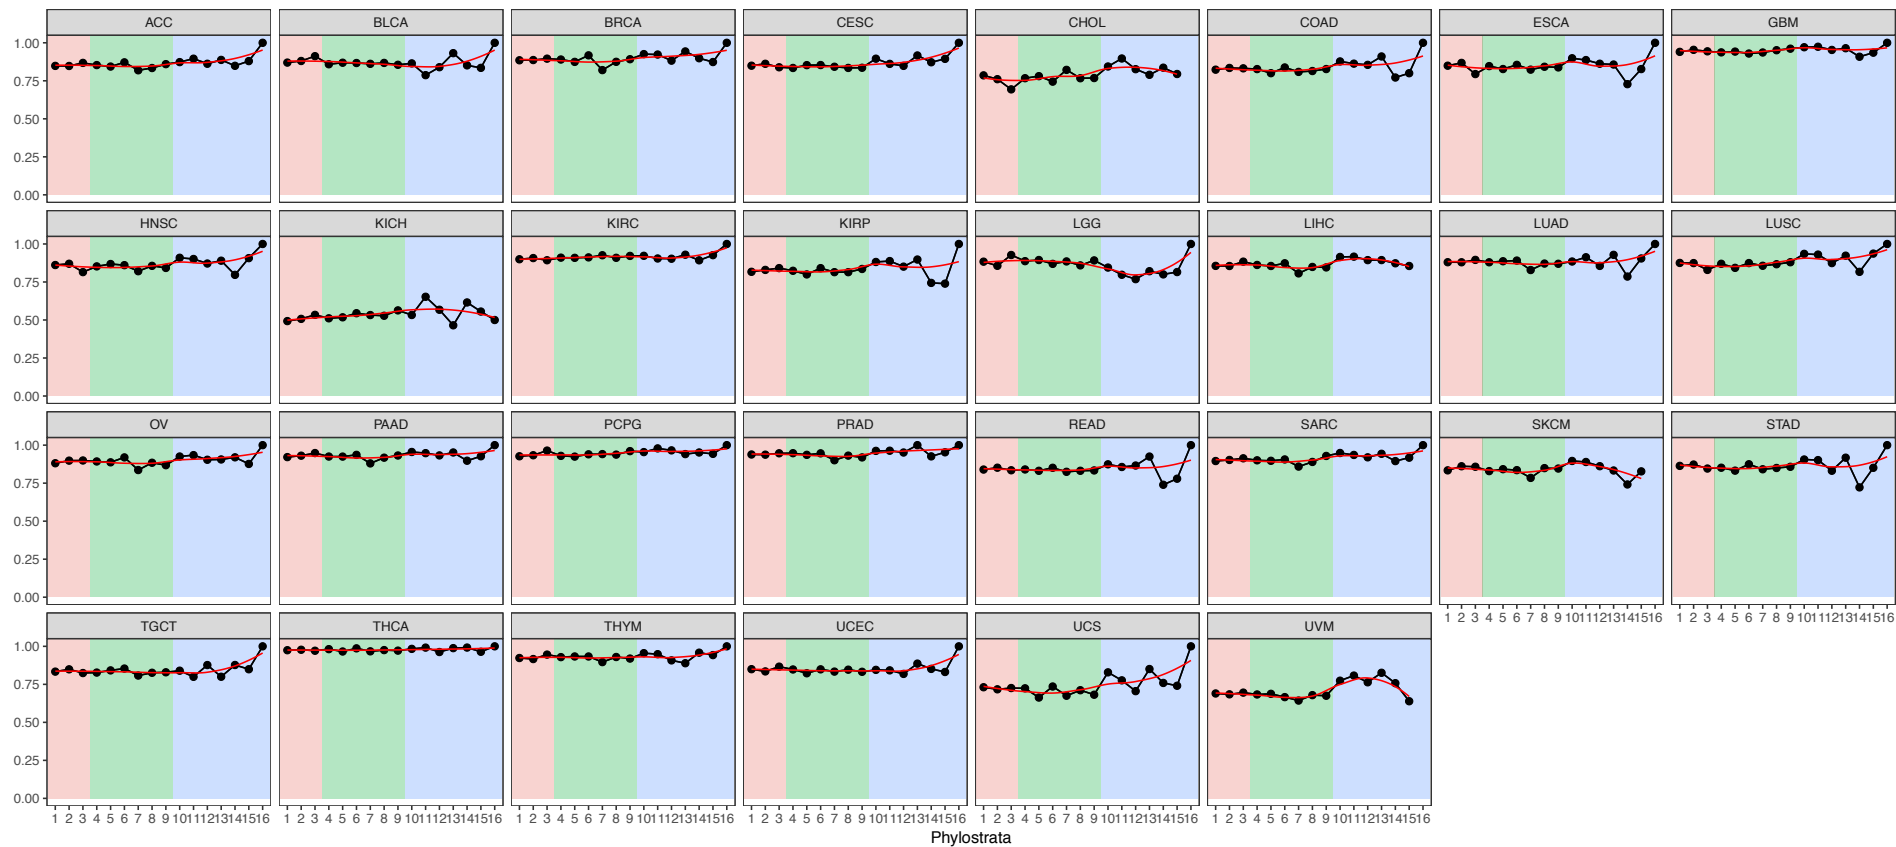

Supplement: supp [file elife-40947-supp-v1.zip › elife_poa_e40947_Figure_1_figure_supplement_6.pdf]

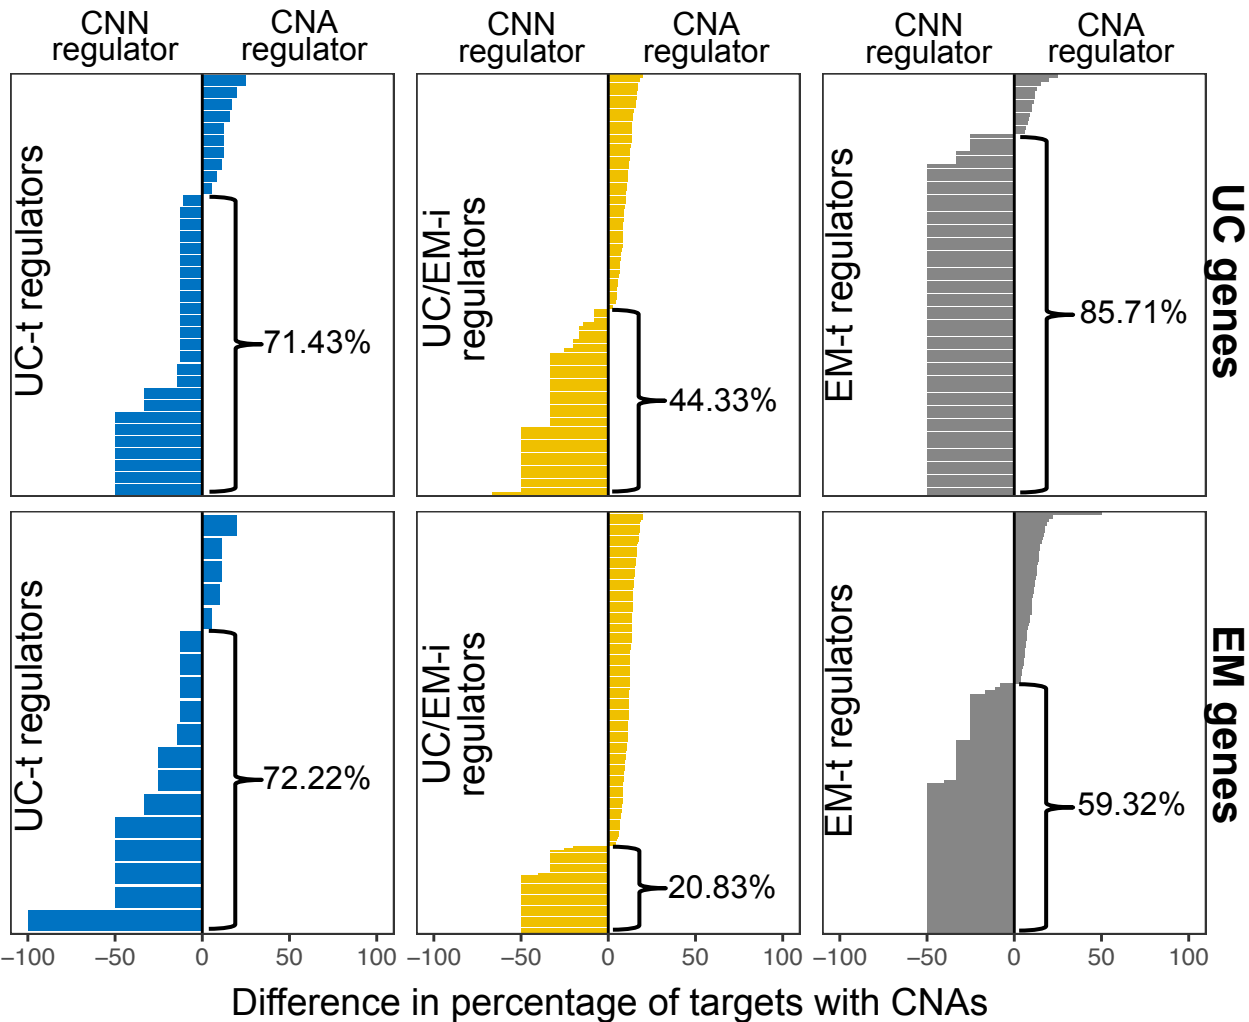

Supplement: supp [file elife-40947-supp-v1.zip › elife_poa_e40947_Figure_4_figure_supplement_4.pdf]

Difference in the percentage of differentially expressed targets and regulators

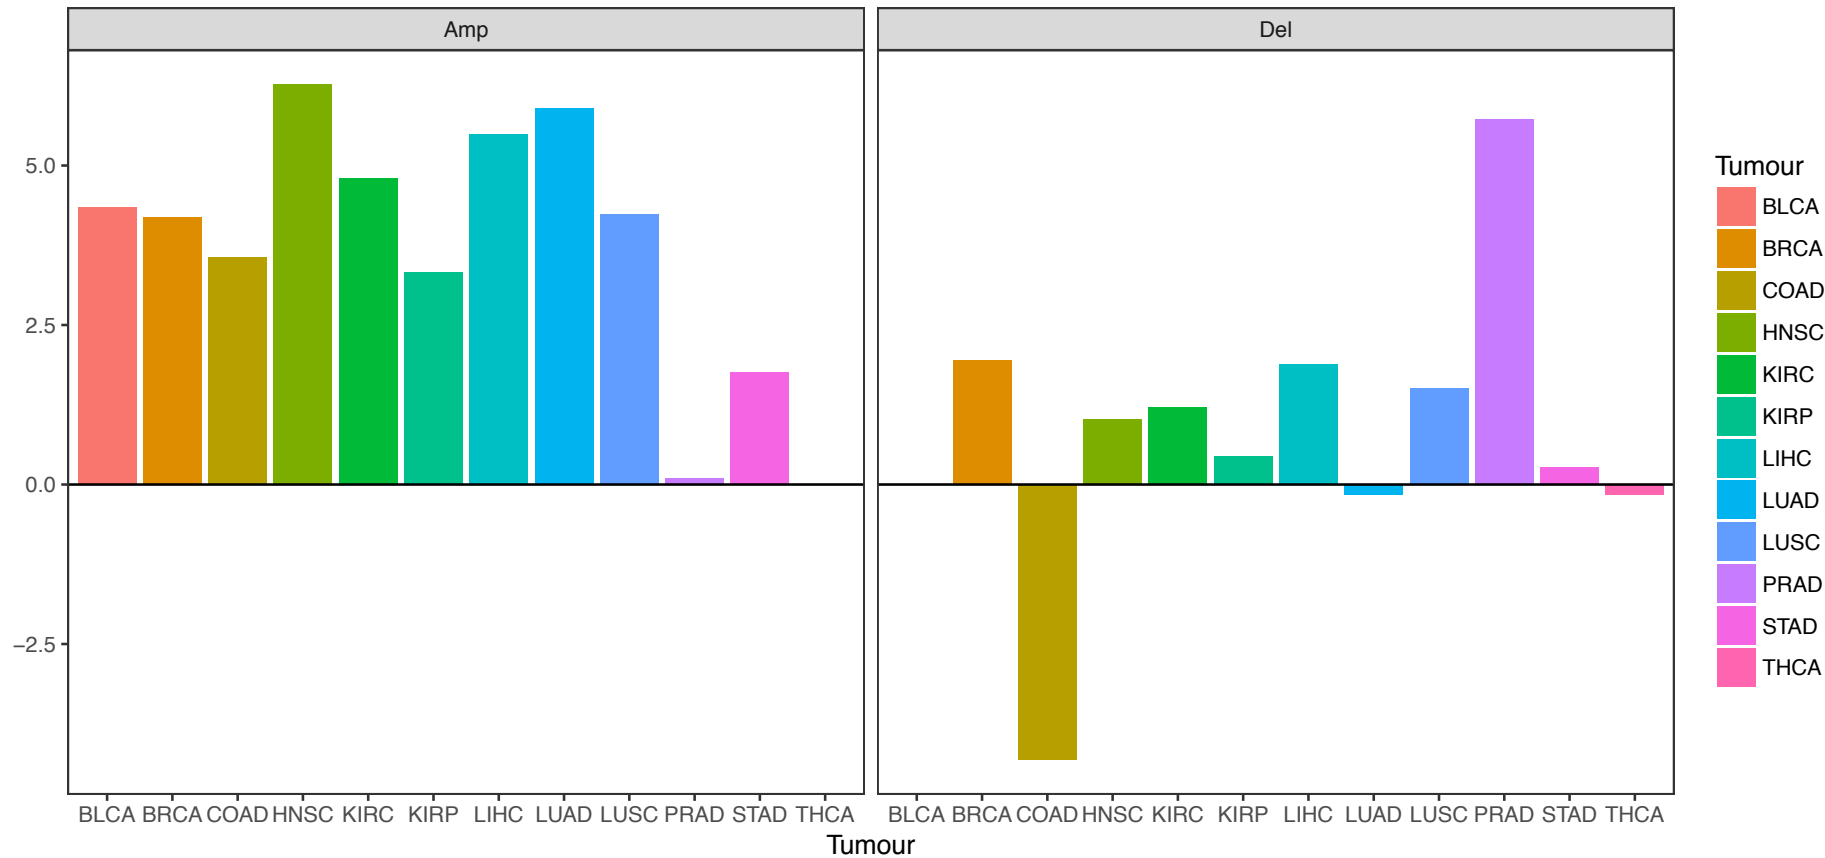

Supplement: supp [file elife-40947-supp-v1.zip › elife_poa_e40947_Figure_4_figure_supplement_1.pdf]

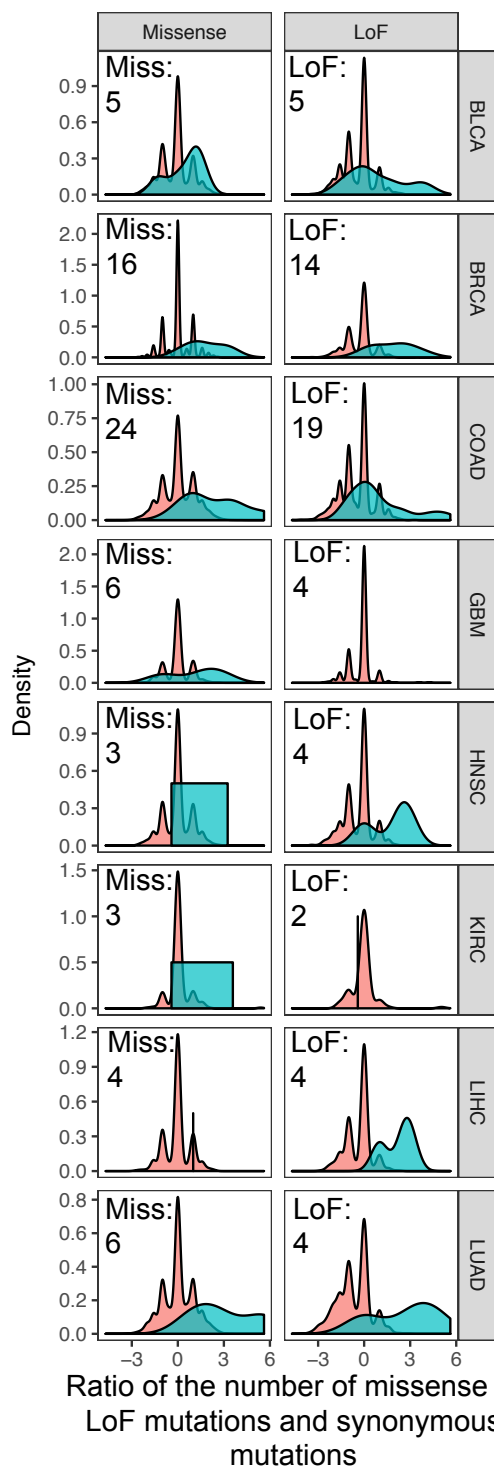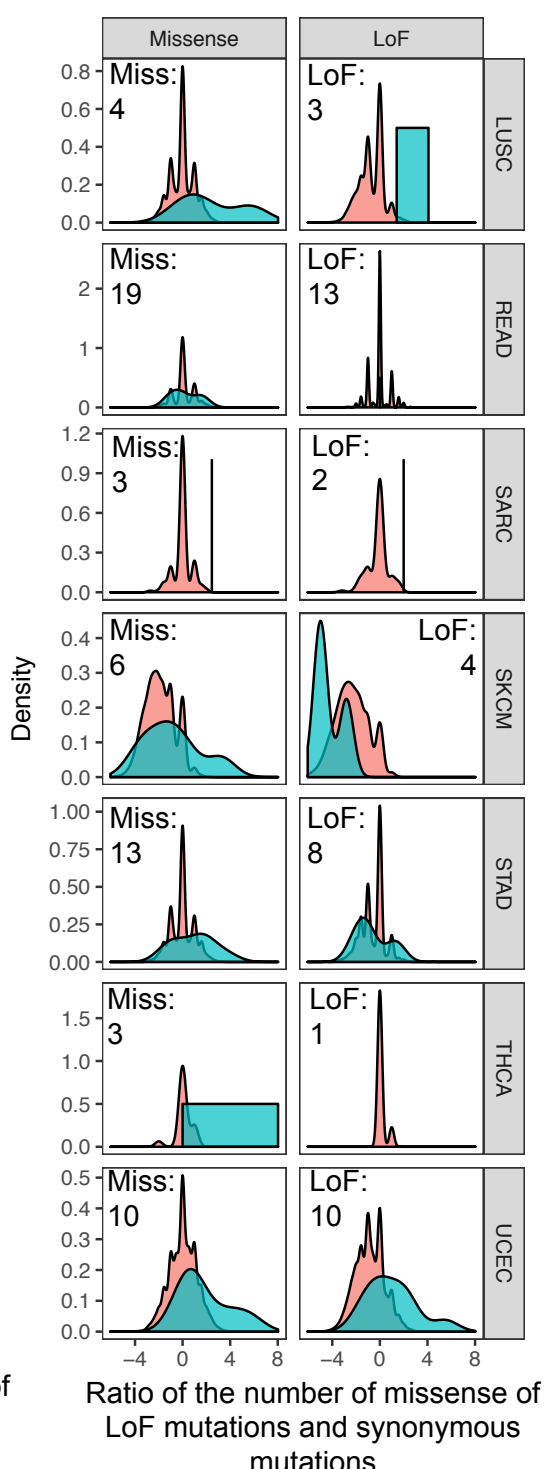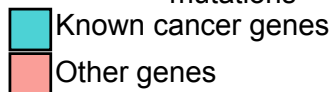

Supplement: supp [file elife-40947-supp-v1.zip › elife_poa_e40947_Figure_1_figure_supplement_1.pdf]

## Regulators

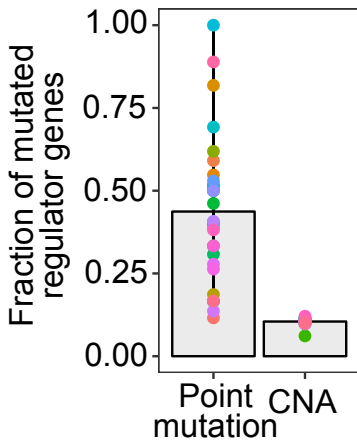

## Targets

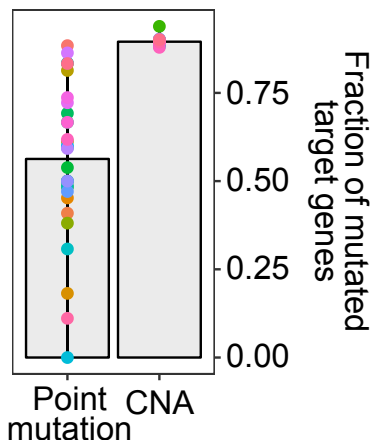

Supplement: supp [file elife-40947-supp-v1.zip › elife_poa_e40947_Figure_2_figure_supplement_5.pdf]

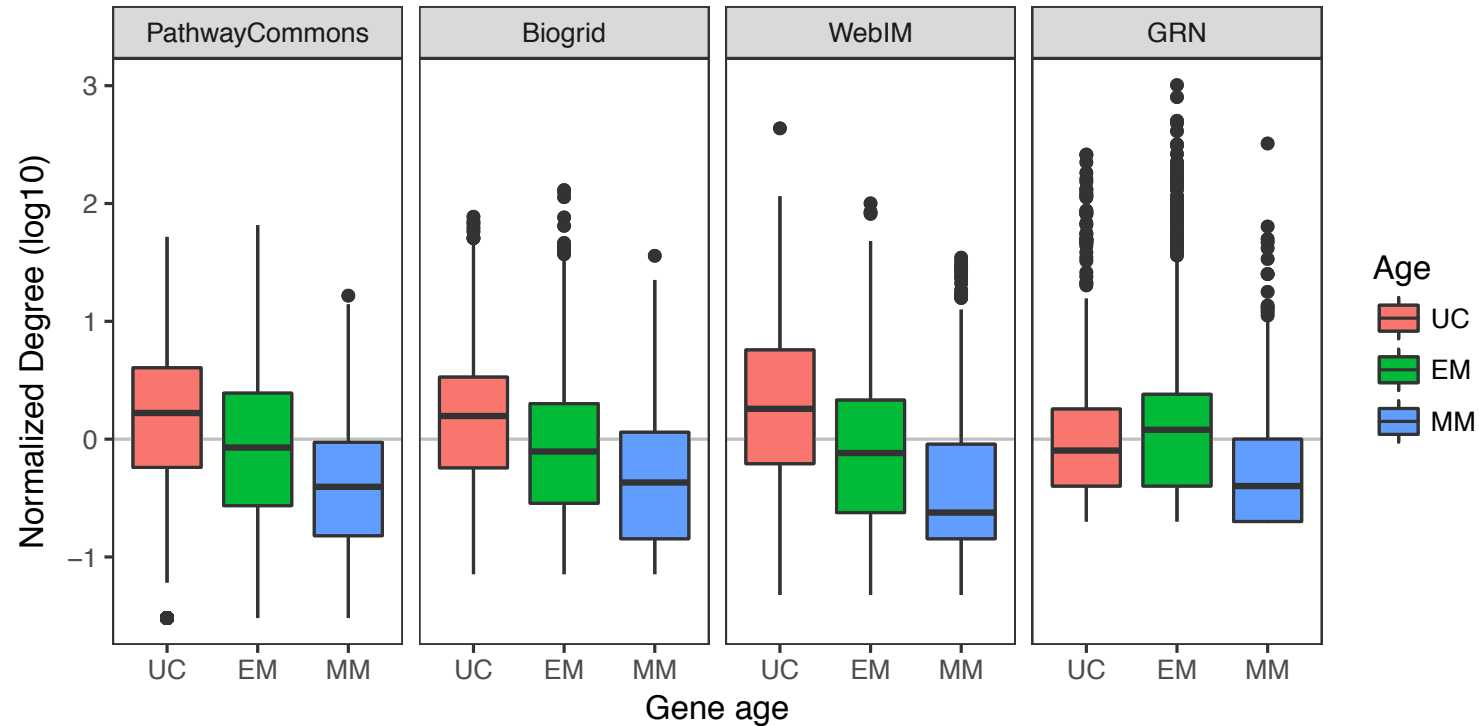

Supplement: supp [file elife-40947-supp-v1.zip › elife_poa_e40947_Figure_2_figure_supplement_2.pdf]
